# Supplementary material for: Postdiagnosis dietary factors, supplement use and breast cancer prognosis: Global Cancer Update Programme (CUP Global) systematic literature review and meta‐analysis
Source: PubMed Central journal article supplement — Int J Cancer. 2022 Oct 24;152(4):616–34. doi: 10.1002/ijc.34321 (PMC10092903; doi:10.1002/ijc.34321), 2022-10-24
Supplement: IJC-152-616-s001.pdf [file IJC-152-616-s001.pdf]

## SUPPORTING INFORMATION

### Post-diagnosis dietary factors, supplement use and breast cancer prognosis: Global Cancer Update Programme (CUP Global) systematic literature review and meta-analysis

Nerea Becerra-Tomás, Katia Balducci, Leila Abar, Dagfinn Aune, Margarita Cariolou, Darren C. Greenwood, Georgios Markozannes, Neesha Nanu, Rita Vieira, Edward L Giovannucci, Marc J Gunter, Alan A Jackson, Ellen Kampman, Vivien Lund, Kate Allen, Nigel T Brockton, Helen Croker, Daphne Katsikioti, Deirdre McGinley-Gieser, Panagiota Mitrou, Martin Wiseman, Amanda J Cross, Elio Riboli, Steven K Clinton, Anne McTiernan, Teresa Norat, Konstantinos K Tsilidis Doris S M Chan

|                                                                                                                                                                               |    |
|-------------------------------------------------------------------------------------------------------------------------------------------------------------------------------|----|
| APPENDIX 1 .....                                                                                                                                                              | 5  |
| Supplementary Table S1. PRISMA checklist .....                                                                                                                                | 5  |
| Supplementary Table S2A. Search terms used for PubMed .....                                                                                                                   | 7  |
| Supplementary Table S2B. Search terms used for Embase .....                                                                                                                   | 10 |
| Supplementary Table S3. Description of the potential influential sources of bias in cancer survival studies .....                                                             | 14 |
| Supplementary Table S4. Grading criteria for evidence on diet, nutrition, physical activity and survival in women with breast cancer .....                                    | 15 |
| Supplementary Table S5. Study characteristics of the included dietary intervention trials in breast cancer survivors .....                                                    | 17 |
| Supplementary Table S6. Main characteristics of dietary patterns of the included observational studies of dietary patterns, lifestyle scores and breast cancer prognosis..... | 21 |
| Supplementary Table S7. Descriptive table of the included observational studies of post-diagnosis dietary patterns, lifestyle scores and breast cancer prognosis .....        | 25 |
| Supplementary Table S8. Descriptive table of the included observational studies of post-diagnosis fruit and vegetable intake and breast cancer prognosis .....                | 62 |
| Supplementary Table S9. Descriptive table of the included observational studies of post-diagnosis whole grain intake and breast cancer prognosis .....                        | 79 |
| Supplementary Table S10. Descriptive table of the included observational studies of post-diagnosis meat intake and breast cancer prognosis.....                               | 81 |
| Supplementary Table S11. Descriptive table of the included observational studies of post-diagnosis fish intake and breast cancer prognosis .....                              | 86 |
| Supplementary Table S12. Descriptive table of the included observational studies of post-diagnosis milk and dairy product intake and breast cancer prognosis.....             | 88 |
| Supplementary Table S13. Descriptive table of the included observational studies of post-diagnosis soy and isoflavone intake and breast cancer prognosis .....                | 94 |

|                                                                                                                                                                              |     |
|------------------------------------------------------------------------------------------------------------------------------------------------------------------------------|-----|
| Supplementary Table S14. Descriptive table of the included observational studies of post-diagnosis carbohydrate intake and breast cancer prognosis.....                      | 111 |
| Supplementary Table S15. Descriptive table of the included observational studies of post-diagnosis protein intake and breast cancer prognosis.....                           | 120 |
| Supplementary Table S16. Descriptive table of the included observational studies of post-diagnosis fat intake and breast cancer prognosis .....                              | 126 |
| Supplementary Table S17. Descriptive table of the included observational studies of post-diagnosis fibre intake and breast cancer prognosis.....                             | 139 |
| Supplementary Table S18. Descriptive table of the included observational studies of post-diagnosis alcohol intake and breast cancer prognosis .....                          | 144 |
| Supplementary Table S19. Descriptive table of the included observational studies of post-diagnosis multivitamin use and breast cancer prognosis .....                        | 160 |
| Supplementary Table S20. Descriptive table of the included observational studies of post-diagnosis antioxidants use and breast cancer prognosis .....                        | 167 |
| Supplementary Table S21. Descriptive table of the included observational studies of post-diagnosis any vitamin or mineral use and breast cancer prognosis .....              | 173 |
| Supplementary Table S22. Descriptive table of the included observational studies of post-diagnosis single vitamin supplementation and breast cancer prognosis .....          | 179 |
| Supplementary Table S23. Descriptive table of the included observational studies of post-diagnosis vitamin D from diet and/or supplements and breast cancer prognosis .....  | 212 |
| Supplementary Table S24. Descriptive table of the included observational studies of post-diagnosis serum 25(OH)D and breast cancer prognosis.....                            | 216 |
| Supplementary Figure S1. Forest plot of prognostic outcomes for the highest compared with the lowest level of fruit and vegetable intake after breast cancer diagnosis ..... | 232 |
| Supplementary Figure S2. Forest plot of prognostic outcomes for the highest compared with the lowest level of wholegrains intake after breast cancer diagnosis .....         | 233 |
| Supplementary Figure S3. Forest plot of prognostic outcomes for the highest compared with the lowest level of meat intake after breast cancer diagnosis .....                | 234 |
| Supplementary Figure S4. Forest plot of prognostic outcomes for the highest compared with the lowest level of fish intake after breast cancer diagnosis.....                 | 235 |
| Supplementary Figure S5. Forest plot of all-cause mortality for the highest compared with the lowest level of dairy intake after breast cancer diagnosis .....               | 236 |
| Supplementary Figure S6. Forest plot of breast cancer mortality for the highest compared with the lowest level of dairy intake after breast cancer diagnosis .....           | 237 |
| Supplementary Figure S7. Forest plot of breast cancer recurrence for the highest compared with the lowest level of dairy intake after breast cancer diagnosis .....          | 238 |
| Supplementary Figure S8. Forest plot of breast cancer prognosis for the highest compared with the lowest level of carbohydrate intake after breast cancer diagnosis .....    | 239 |

|                                                                                                                                                                                         |     |
|-----------------------------------------------------------------------------------------------------------------------------------------------------------------------------------------|-----|
| Supplementary Figure S9. Nonlinear dose-response meta-analysis of post-diagnosis carbohydrate intake and breast cancer-specific mortality.....                                          | 240 |
| Supplementary Figure S10. Forest plot of all-cause mortality for the highest compared with the lowest level of protein intake after breast cancer diagnosis .....                       | 241 |
| Supplementary Figure S11. Forest plot of breast cancer mortality for the highest compared with the lowest level of protein intake after breast cancer diagnosis .....                   | 242 |
| Supplementary Figure S12. Forest plot of distant breast cancer recurrence for the highest compared with the lowest level of protein intake after breast cancer diagnosis .....          | 243 |
| Supplementary Figure S13. Forest plot of all-cause mortality for the highest compared with the lowest level of fat intake after breast cancer diagnosis .....                           | 244 |
| Supplementary Figure S14. Forest plot of breast cancer mortality for the highest compared with the lowest level of fat intake after breast cancer diagnosis .....                       | 245 |
| Supplementary Figure S15. Forest plot of all-cause mortality for the highest compared with the lowest level of fibre intake after breast cancer diagnosis. ....                         | 246 |
| Supplementary Figure S16. Forest plot of breast cancer mortality for the highest compared with the lowest level of fibre intake after breast cancer diagnosis .....                     | 247 |
| Supplementary Figure S17. Forest plot of all-cause mortality for the highest compared to the lowest level of alcohol intake after breast cancer diagnosis .....                         | 248 |
| Supplementary Figure S18. Forest plot of breast cancer mortality for the highest compared to the lowest level of alcohol intake after breast cancer diagnosis .....                     | 249 |
| Supplementary Figure S19. Forest plot of breast cancer recurrence for the highest compared to the lowest level of alcohol intake after breast cancer diagnosis .....                    | 250 |
| Supplementary Figure S20. Forest plot of second cancer for the highest compared to the lowest level of alcohol intake after breast cancer diagnosis .....                               | 251 |
| Supplementary Figure S21. Nonlinear dose-response meta-analyses of post-diagnosis alcohol intake and all-cause mortality .....                                                          | 252 |
| Supplementary Figure S22. Nonlinear dose-response meta-analyses of post-diagnosis alcohol intake and breast cancer mortality .....                                                      | 253 |
| Supplementary Figure S23. Forest plot of all-cause for the highest compared to the lowest level of vitamin D intake from diet and/or supplements after breast cancer diagnosis .....    | 254 |
| Supplementary Figure S24. Non-linear dose-response meta-analysis of post-diagnosis serum 25-hydroxyvitamin D and all-cause mortality .....                                              | 255 |
| Supplementary Figure S25. Meta-analysis for highest compared with the lowest level of post-diagnosis serum 25(OH)D collected before initiation treatment and all-cause mortality.....   | 256 |
| Supplementary Figure S26. Linear dose-response meta-analysis per 10 nmol/L increase of post-diagnosis serum 25(OH)D collected before initiation treatment and all-cause mortality ..... | 257 |

|                                                                                                                                                                                            |     |
|--------------------------------------------------------------------------------------------------------------------------------------------------------------------------------------------|-----|
| Supplementary Figure S27. Meta-analysis for highest compared with the lowest level of post-diagnosis serum 25(OH)D collected before initiation treatment and breast cancer mortality ..... | 258 |
| Supplementary Figure S28. Forest plot of breast cancer recurrence for the highest compared to the lowest level of serum 25(OH)D after breast cancer diagnosis .....                        | 259 |
| APPENDIX 2 .....                                                                                                                                                                           | 260 |
| Material and methods.....                                                                                                                                                                  | 260 |
| Outcome definition .....                                                                                                                                                                   | 260 |
| Risk of bias assessment.....                                                                                                                                                               | 260 |
| Statistical analysis .....                                                                                                                                                                 | 261 |
| References .....                                                                                                                                                                           | 263 |

## APPENDIX 1

### Supplementary Table S1. PRISMA checklist

| <b>PRISMA Checklist 2009</b>       |          |                                                                                                                                                                                                                                                                                                             |                                 |
|------------------------------------|----------|-------------------------------------------------------------------------------------------------------------------------------------------------------------------------------------------------------------------------------------------------------------------------------------------------------------|---------------------------------|
| <b>Section/topic</b>               | <b>#</b> | <b>Checklist item</b>                                                                                                                                                                                                                                                                                       | <b>Reported on page #</b>       |
| <b>TITLE</b>                       |          |                                                                                                                                                                                                                                                                                                             |                                 |
| Title                              | 1        | Identify the report as a systematic review, meta-analysis, or both.                                                                                                                                                                                                                                         | 1                               |
| <b>ABSTRACT</b>                    |          |                                                                                                                                                                                                                                                                                                             |                                 |
| Structured summary                 | 2        | Provide a structured summary including, as applicable: background; objectives; data sources; study eligibility criteria, participants, and interventions; study appraisal and synthesis methods; results; limitations; conclusions and implications of key findings; systematic review registration number. | 3                               |
| <b>INTRODUCTION</b>                |          |                                                                                                                                                                                                                                                                                                             |                                 |
| Rationale                          | 3        | Describe the rationale for the review in the context of what is already known.                                                                                                                                                                                                                              | 4                               |
| Objectives                         | 4        | Provide an explicit statement of questions being addressed with reference to participants, interventions, comparisons, outcomes, and study design (PICOS).                                                                                                                                                  | 4                               |
| <b>METHODS</b>                     |          |                                                                                                                                                                                                                                                                                                             |                                 |
| Protocol and registration          | 5        | Indicate if a review protocol exists, if and where it can be accessed (e.g., Web address), and, if available, provide registration information including registration number.                                                                                                                               | 5                               |
| Eligibility criteria               | 6        | Specify study characteristics (e.g., PICOS, length of follow-up) and report characteristics (e.g., years considered, language, publication status) used as criteria for eligibility, giving rationale.                                                                                                      | 5                               |
| Information sources                | 7        | Describe all information sources (e.g., databases with dates of coverage, contact with study authors to identify additional studies) in the search and date last searched.                                                                                                                                  | 5                               |
| Search                             | 8        | Present full electronic search strategy for at least one database, including any limits used, such that it could be repeated.                                                                                                                                                                               | Supplementary Material          |
| Study selection                    | 9        | State the process for selecting studies (i.e., screening, eligibility, included in systematic review, and, if applicable, included in the meta-analysis).                                                                                                                                                   | 5                               |
| Data collection process            | 10       | Describe method of data extraction from reports (e.g., piloted forms, independently, in duplicate) and any processes for obtaining and confirming data from investigators.                                                                                                                                  | 5                               |
| Data items                         | 11       | List and define all variables for which data were sought (e.g., PICOS, funding sources) and any assumptions and simplifications made.                                                                                                                                                                       | 5                               |
| Risk of bias in individual studies | 12       | Describe methods used for assessing risk of bias of individual studies (including specification of whether this was done at the study or outcome level), and how this information is to be used in any data synthesis.                                                                                      | 5                               |
| Summary measures                   | 13       | State the principal summary measures (e.g., risk ratio, difference in means).                                                                                                                                                                                                                               | 5                               |
| Synthesis of results               | 14       | Describe the methods of handling data and combining results of studies, if done, including measures of consistency (e.g., I <sup>2</sup> ) for each meta-analysis.                                                                                                                                          | 5-6, and Supplementary Material |

From: Moher D, Liberati A, Tetzlaff J, Altman DG, The PRISMA Group (2009). Preferred Reporting Items for Systematic Reviews and Meta-Analyses: The PRISMA Statement. PLoS Med 6(6): e1000097. doi:10.1371/journal.pmed1000097 For more information, visit: [www.prisma-statement.org](http://www.prisma-statement.org).

**Supplementary Table 1 PRISMA Checklist 2009**

| Section/topic                 | #  | Checklist item                                                                                                                                                                                           | Reported on page #                    |
|-------------------------------|----|----------------------------------------------------------------------------------------------------------------------------------------------------------------------------------------------------------|---------------------------------------|
| Risk of bias across studies   | 15 | Specify any assessment of risk of bias that may affect the cumulative evidence (e.g., publication bias, selective reporting within studies).                                                             | 6 and supplementary material          |
| Additional analyses           | 16 | Describe methods of additional analyses (e.g., sensitivity or subgroup analyses, meta-regression), if done, indicating which were pre-specified.                                                         | 6 and supplementary material          |
| <b>RESULTS</b>                |    |                                                                                                                                                                                                          |                                       |
| Study selection               | 17 | Give numbers of studies screened, assessed for eligibility, and included in the review, with reasons for exclusions at each stage, ideally with a flow diagram.                                          | 6 and Figure 1                        |
| Study characteristics         | 18 | For each study, present characteristics for which data were extracted (e.g., study size, PICOS, follow-up period) and provide the citations.                                                             | 6-12, and Supplementary tables S4-S22 |
| Risk of bias within studies   | 19 | Present data on risk of bias of each study and, if available, any outcome level assessment (see item 12).                                                                                                | SLR published online                  |
| Results of individual studies | 20 | For all outcomes considered (benefits or harms), present, for each study: (a) simple summary data for each intervention group (b) effect estimates and confidence intervals, ideally with a forest plot. | 6-12, and Supplementary material      |
| Synthesis of results          | 21 | Present results of each meta-analysis done, including confidence intervals and measures of consistency.                                                                                                  | 6-12, and Supplementary material      |
| Risk of bias across studies   | 22 | Present results of any assessment of risk of bias across studies (see Item 15).                                                                                                                          | -                                     |
| Additional analysis           | 23 | Give results of additional analyses, if done (e.g., sensitivity or subgroup analyses, meta-regression [see Item 16]).                                                                                    | 12                                    |
| <b>DISCUSSION</b>             |    |                                                                                                                                                                                                          |                                       |
| Summary of evidence           | 24 | Summarize the main findings including the strength of evidence for each main outcome; consider their relevance to key groups (e.g., healthcare providers, users, and policy makers).                     | 13-15, and Table 1                    |
| Limitations                   | 25 | Discuss limitations at study and outcome level (e.g., risk of bias), and at review-level (e.g., incomplete retrieval of identified research, reporting bias).                                            | 16-17                                 |
| Conclusions                   | 26 | Provide a general interpretation of the results in the context of other evidence, and implications for future research.                                                                                  | 13-15                                 |
| <b>FUNDING</b>                |    |                                                                                                                                                                                                          |                                       |
| Funding                       | 27 | Describe sources of funding for the systematic review and other support (e.g., supply of data); role of funders for the systematic review.                                                               | 18-19                                 |

## Supplementary Table S2A. Search terms used for PubMed

### a. Searching for mortality, survival, recurrence, second cancer

1. Recurrence [MeSH Terms] OR “Neoplasm Recurrence, Local” [MeSH Terms] OR “Disease Progression”[MeSH Terms] OR “Disease-Free Survival”[MeSH Terms] OR Mortality[MeSH Terms] OR Mortality [Subheading] OR “Survival Analysis” [MeSH Terms] OR recurrence [tiab] OR recurrences [tiab] OR relapse [tiab] OR relapses [tiab] OR survivor [tiab] OR survivors [tiab] OR progression [tiab] OR survival [tiab] OR mortality [tiab] OR death [tiab] OR second cancer [tiab]

### b. Searching for studies on breast cancer

(Search terms are those tested in the SLR for the WCRF Second Expert Report and the CUP)

2. Breast Neoplasms [MeSH Terms]

3. Breast AND (cancer\* OR neoplasm\* OR tumor\* OR tumor\* OR carcinoma\* OR adenocarcinoma\*)

4. mammary AND (cancer\* OR neoplasm\* OR tumor\* OR tumor\* OR carcinoma\* OR adenocarcinoma\*)

5. #2 OR #3 OR #4

### c. Search for all studies relating to diet, body fatness and physical activity

6. diet therapy[MeSH Terms] OR nutrition[MeSH Terms]

7. diet[tiab] OR diets[tiab] OR dietetic[tiab] OR dietary[tiab] OR eating[tiab] OR intake[tiab] OR nutrient\*[tiab] OR nutrition[tiab] OR vegetarian\*[tiab] OR vegan\*[tiab] OR "seventh day adventist"[tiab] OR macrobiotic[tiab]

8. “food and beverages” [MeSH Terms]

9. food\*[tiab] OR cereal\*[tiab] OR grain\*[tiab] OR granary[tiab] OR

wholegrain[tiab] OR wholewheat[tiab] OR roots[tiab] OR plantain\*[tiab] OR tuber[tiab]

OR tubers[tiab] OR vegetable\*[tiab] OR fruit\*[tiab] OR pulses[tiab] OR beans[tiab] OR

lentils[tiab] OR chickpeas[tiab] OR legume\*[tiab] OR soy[tiab] OR soya[tiab] OR

nut[tiab] OR nuts[tiab] OR peanut\*[tiab] OR groundnut\*[tiab] OR (seeds[tiab] AND (diet\*[tiab] OR food\*[tiab])) OR meat[tiab] OR beef[tiab] OR pork[tiab] OR lamb[tiab] OR poultry[tiab] OR chicken[tiab] OR turkey[tiab] OR duck[tiab] OR (fish[tiab] AND (diet\*[tiab] OR food\*[tiab])) OR ((fat[tiab] OR fats[tiab] OR fatty[tiab]) AND (diet\*[tiab] OR food\*[tiab] OR adipose[tiab] OR blood[tiab] OR serum[tiab] OR plasma[tiab])) OR egg[tiab] OR eggs[tiab] OR bread[tiab] OR (oils[tiab] AND (diet\*[tiab] OR food\*[tiab] OR adipose[tiab] OR blood[tiab] OR serum[tiab] OR plasma[tiab])) OR shellfish[tiab] OR seafood[tiab] OR sugar[tiab] OR syrup[tiab] OR dairy[tiab] OR milk[tiab] OR herbs[tiab] OR spices[tiab] OR chilli[tiab] OR chillis[tiab] OR pepper\*[tiab] OR condiments[tiab] OR tomato\*[tiab]

10. fluid intake[tiab] OR water[tiab] OR drinks[tiab] OR drinking[tiab] OR tea[tiab] OR coffee[tiab] OR caffeine[tiab] OR juice[tiab] OR beer[tiab] OR spirits[tiab] OR

liquor[tiab] OR wine[tiab] OR alcohol[tiab] OR alcoholic[tiab] OR beverage\*[tiab] OR

(ethanol[tiab] AND (drink\*[tiab] OR intake[tiab] OR consumption[tiab])) OR yerba mate[tiab] OR ilex paraguariensis[tiab]

11. pesticides[MeSH Terms] OR fertilizers[MeSH Terms] OR "veterinary drugs"[MeSH Terms]

12. pesticide\*[tiab] OR herbicide\*[tiab] OR DDT[tiab] OR fertiliser\*[tiab] OR fertilizer\*[tiab] OR organic[tiab] OR contaminants[tiab] OR contaminate\*[tiab] OR veterinary drug\*[tiab] OR polychlorinated dibenzofuran\*[tiab] OR PCDF\*[tiab] OR polychlorinated dibenzodioxin\*[tiab] OR PCDD\*[tiab] OR polychlorinated biphenyl\*[tiab] OR PCB\*[tiab] OR cadmium[tiab] OR arsenic[tiab] OR chlorinated hydrocarbon\*[tiab] OR microbial contamination\*[tiab]

13. food preservation[MeSH Terms]

14. (mycotoxin\*[tiab] OR aflatoxin\*[tiab] OR pickled[tiab] OR bottled[tiab] OR bottling[tiab] OR canned[tiab] OR canning[tiab] OR vacuum pack\*[tiab] OR refrigerate\*[tiab] OR refrigeration[tiab] OR cured[tiab] OR smoked[tiab] OR preserved[tiab] OR preservatives[tiab] OR nitrosamine[tiab] OR hydrogenation[tiab] OR fortified[tiab] OR additive\*[tiab] OR colouring\*[tiab] OR coloring\*[tiab] OR flavouring\*[tiab] OR flavoring\*[tiab] OR nitrates[tiab] OR nitrites[tiab] OR solvent[tiab] OR solvents[tiab] OR ferment\*[tiab] OR processed[tiab] OR antioxidant\*[tiab] OR genetic modif\*[tiab] OR genetically modif\*[tiab] OR vinyl chloride[tiab] OR packaging[tiab] OR labelling[tiab] OR phthalates[tiab]) AND (diet\*[tiab] OR food\*[tiab] OR adipose[tiab] OR blood[tiab] OR serum[tiab] OR plasma[tiab])

15. cookery[MeSH Terms]

16. cooking[tiab] OR cooked[tiab] OR grill[tiab] OR grilled[tiab] OR fried[tiab] OR fry[tiab] OR roast[tiab] OR bake[tiab] OR baked[tiab] OR stewing[tiab] OR stewed[tiab] OR casserol\*[tiab] OR broil[tiab] OR broiled[tiab] OR boiled[tiab] OR ((microwave[tiab] OR microwaved[tiab] OR re-heating[tiab] OR reheating[tiab] OR heating[tiab] OR re-heated[tiab] OR heated[tiab]) AND (diet\*[tiab] OR food\*[tiab])) OR poach[tiab] OR poached[tiab] OR steamed[tiab] OR barbecue\*[tiab] OR chargrill\*[tiab] OR heterocyclic amines[tiab] OR polycyclic aromatic hydrocarbons[tiab]

17. ((carbohydrates[MeSH Terms] OR proteins[MeSH Terms]) AND (diet\*[tiab] OR food\*[tiab])) OR sweetening agents[MeSH Terms]

18. (salt[tiab] OR salting[tiab] OR salted[tiab] OR fiber[tiab] OR fibre[tiab] OR polysaccharide\*[tiab] OR starch[tiab] OR starchy[tiab] OR carbohydrate\*[tiab] OR lipid\*[tiab] OR linoleic acid\*[tiab] OR sterols[tiab] OR stanols[tiab] OR sugar\*[tiab] OR sweetener\*[tiab] OR saccharin\*[tiab] OR



aspartame[tiab] OR acesulfame[tiab] OR cyclamates[tiab] OR maltose[tiab] OR mannitol[tiab] OR sorbitol[tiab] OR sucrose[tiab] OR xylitol[tiab] OR cholesterol[tiab] OR protein[tiab] OR proteins[tiab] OR hydrogenated dietary oils[tiab] OR hydrogenated lard[tiab] OR hydrogenated oils[tiab]) AND (diet\*[tiab] OR food\*[tiab] OR adipose[tiab] OR blood[tiab] OR serum[tiab] OR plasma[tiab])

19. vitamins[MeSH Terms]

20. supplements[tiab] OR supplement[tiab] OR vitamin\*[tiab] OR retinol[tiab] OR

carotenoid\*[tiab] OR tocopherol[tiab] OR folate\*[tiab] OR folic acid[tiab] OR methionine[tiab] OR riboflavin[tiab] OR thiamine[tiab] OR niacin[tiab] OR pyridoxine[tiab] OR cobalamin[tiab] OR mineral\*[tiab] OR (sodium[tiab] AND (diet\*[tiab] OR food\*[tiab])) OR iron[tiab] OR ((calcium[tiab] AND (diet\*[tiab] OR food\*[tiab] OR supplement\*[tiab])) OR selenium[tiab] OR (iodine[tiab] AND (diet\*[tiab] OR food\*[tiab] OR supplement\*[tiab] OR deficiency))) OR magnesium[tiab] OR potassium[tiab] OR zinc[tiab] OR copper[tiab] OR phosphorus[tiab] OR manganese[tiab] OR chromium[tiab] OR phytochemical[tiab] OR allium[tiab] OR isothiocyanate\*[tiab] OR glucosinolate\*[tiab] OR indoles[tiab] OR polyphenol\*[tiab] OR phytestrogen\*[tiab] OR genistein[tiab] OR saponin\*[tiab] OR coumarin\*[tiab] OR lycopene[tiab]

21. physical fitness[MeSH Terms] OR physical exertion[MeSH Terms] OR physical endurance[MeSH Terms] OR walking[MeSH Terms] OR exercise[MeSH Terms] OR muscle stretching exercises[MeSH Terms] OR tai ji[MeSH Terms] OR yoga[MeSH Terms] OR sedentary lifestyle[MeSH Terms]

22. recreational activit\*[tiab] OR household activit\*[tiab] OR occupational

activit\*[tiab] OR physical activit\*[tiab] OR physical inactivit\*[tiab] OR exercise[tiab]

OR exercising[tiab] OR energy intake[tiab] OR energy expenditure[tiab] OR energy

balance[tiab] OR energy density[tiab] OR sedentar\*[tiab] OR standing[tiab] OR sitting[tiab] OR television[tiab] OR aerobic activities[tiab] OR aerobic activity[tiab] OR cardiovascular activities[tiab] OR cardiovascular activity[tiab] OR endurance activities[tiab] OR endurance activity[tiab] OR resistance training[tiab] OR strength training[tiab] OR physical conditioning[tiab] OR functional training[tiab] OR leisure-time physical activity[tiab] OR lifestyle activities[tiab] OR lifestyle activity[tiab] OR qi gong[tiab] OR tai chi[tiab] OR tai ji[tiab] OR yoga[tiab] OR free living activities[tiab] OR free living activity[tiab] OR walk[tiab] OR walking[tiab]

23. body weight[MeSH Terms] OR anthropometry[MeSH Terms] OR body composition[MeSH Terms] OR body constitution[MeSH Terms] OR body size[MeSH Terms] OR body size[tiab]

24. weight loss[tiab] OR weight gain[tiab] OR anthropometry[tiab] OR birth weight[tiab] OR birthweight[tiab] OR birth-weight[tiab] OR child development[tiab] OR

height[tiab] OR body composition[tiab] OR body mass index[tiab] OR BMI[tiab] OR

obesity[tiab] OR obese[tiab] OR overweight[tiab] OR over-weight[tiab] OR over

weight[tiab] OR skinfold measurement\*[tiab] OR skinfold thickness[tiab] OR

DEXA[tiab] OR bio-impedence[tiab] OR waist circumference[tiab] OR hip circumference[tiab] OR waist hip ratio\*[tiab]

25. #6 OR #7 OR #8 OR #9 OR #10 OR #11 OR

#12 OR #13 OR #14 OR #15 OR #16 OR #17 OR #18 OR #19 OR #20 OR #21 OR #22 OR #23 OR #24

**d. Limiting to human studies:**

26. animal [MeSH Terms] NOT human [MeSH Terms]

27. #25 NOT #26

**e. Combining the searches for each cancer**

(a) AND (b) AND (c) AND (d)

i.e. #1 AND #5 AND #27

**Supplementary Table S2B. Search terms used for Embase**

**a. Searching for mortality, survival, recurrence, second cancer.**

- 1 \*Recurrent disease/
- 2 \*Disease exacerbation/
- 3 Disease free survival/
- 4 mortality/ or all-cause mortality/ or cancer mortality/ or cardiovascular mortality/ or mortality rate/ or premature mortality/
- 5 Survival analysis/
- 6 Relapse/
- 7 Survivor/
- 8 Second cancer/
- 9 (recur\$ or local recurrence or progression or relap\$ or prognos\$ or surviv\$ or mortality or death or (second\$ adj5 primar\$)).ab,ti.
- 10 1 or 2 or 3 or 4 or 5 or 6 or 7 or 8 or 9

**b. Searching for studies on breast cancer**

- 11 breast tumor/
- 12 (breast and (cancer\$ or neoplasm\$ or tumour\$ or tumor\$ or carcinoma\$ or adenocarcinoma\$)).tw,kw.

- 13 (mammary and (cancer\$ or neoplasm\$ or tumour\$ or tumor\$ or carcinoma\$ or adenocarcinoma\$)).tw,kw.
- 14 11 or 12 or 13

**c. Search for all studies relating to diet, body fatness and physical activity**

- 15 Diet therapy/
- 16 Nutrition/
- 17 (diet or diets or dietetic\$ or dietary or eating or intake or nutrient\$ or nutrition or vegetarian\$ or vegan\$ or (seventh adj1 day adj1 adventist) or macrobiotic).ab,ti.
- 18 15 or 16 or 17
- 19 Food/
- 20 (food\$ or cereal\$ or grain\$ or granary or wholegrain or wholewheat or roots or plantain\$ or tuber or tubers or vegetable\$ or fruit\$ or pulses or beans or lentils or chickpeas or legume\$ or soy or soya or nut or nuts or peanut\$ or groundnut\$ or (seeds and (diet\$ or food\$))).ab,ti.
- 21 (meat or beef or pork or lamb or poultry or chicken or turkey or duck or (fish and (diet\$ or food\$)) or ((fat or fats or fatty) and (diet\$ or food\$ or adipose or blood or serum or plasma)) or egg or eggs or bread or (oils and (diet\$ or food\$ or adipose or blood or serum or plasma)) or shellfish or seafood or sugar or syrup or dairy or milk or herbs or spices or chilli or chillis or pepper\$ or condiments or tomato\$).ab,ti.
- 22 19 or 20 or 21
- 23 Beverage/
- 24 (fluid intake or water or drinks or drinking or tea or coffee or caffeine or juice or beer or spirits or liquor or wine or alcohol or alcoholic or beverage\$ or (ethanol and (drink\$ or intake or consumption)) or yerba mate or ilex or paraguariensis).ab,ti.
- 25 23 or 24
- 26 \*Pesticide/
- 27 \*Fertilizer/
- 28 \*Veterinary drug/
- 29 (pesticide\$ or herbicide\$ or DDT or fertiliser\$ or fertilizer\$ or organic or contaminants or contaminate\$ or veterinary drug\$ or polychlorinated dibenzofuran\$ or PCDF\$ or polychlorinated dibenzodioxin\$ or PCDD\$ or polychlorinated biphenyl\$ or PCB\$ or cadmium or arsenic or chlorinated hydrocarbon\$ or microbial contamination\$).ab,ti.
- 30 26 or 27 or 28 or 29
- 31 Food Preservation/

- 32 ((mycotoxin\$ or aflatoxin\$ or pickled or bottled or bottling or canned or canning or vacuum pack\$ or refrigerate\$ or refrigeration or cured or smoked or preserved or preservatives or nitrosamine or hydrogenation or fortified or additive\$ or colouring\$ or coloring\$ or flavouring\$ or flavoring\$ or nitrates or nitrites or solvent or solvents or ferment\$ or processed or antioxidant\$ or genetic modif\$ or genetically modif\$ or vinyl chloride or packaging or labelling or phthalates) and (diet\$ or food\$ or adipose or blood or serum or plasma)).ab,ti.
- 33 31 or 32
- 34 Cooking/
- 35 (cooking or cooked or grill or grilled or fried or fry or roast or bake or baked or stewing or stewed or casserol\$ or broil or broiled or boiled or (microwave or microwaved or re-heating or reheating or heating or re-heated or heated and (diet\$ or food\$)) or poach or poached or steamed or barbecue\$ or chargrill\$ or heterocyclic amines or polycyclic aromatic hydrocarbons).ab,ti.
- 36 34 or 35
- 37 Carbohydrate/ and ((diet\$ or food\$).ab,ti.)
- 38 Protein/ and ((diet\$ or food\$).ab,ti.)
- 39 Sweetening agent/
- 40 ((salt or salting or salted or fiber or fibre or polysaccharide\$ or starch or starchy or carbohydrate\$ or lipid\$ or linoleic acid\$ or sterols or stanols or sugar\$ or sweetener\$ or saccharin\$ or aspartame or acesulfame or cyclamates or maltose or mannitol or sorbitol or sucrose or xylitol or cholesterol or hydrogenated dietary oils or hydrogenated lard or hydrogenated oils or protein\$) and (diet\$ or food\$ or adipose or blood or serum or plasma)).ab,ti.
- 41 37 or 38 or 39 or 40
- 42 Vitamins/
- 43 Vitamin D/ or (supplements or supplement or vitamin\$ or retinol or carotenoid\$ or tocopherol or folate\$ or folic acid or methionine or riboflavin or thiamine or niacin or pyridoxine or cobalamin or mineral\$ or (sodium and (diet\$ or food\$)) or iron or (calcium and (diet\$ or food\$ or supplement\$)) or selenium or (iodine and (diet\$ or food\$ or supplement\$ or deficiency)) or magnesium or potassium or zinc or copper or phosphorus or manganese or chromium or phytochemical or allium or isothiocyanate\$ or glucosinolate\$ or indoles or polyphenol\$ or phytoestrogen\$ or genistein or saponin\$ or coumarin\$ or lycopene).ab,ti.
- 44 42 or 43
- 45 \*Fitness/
- 46 Exercise/
- 47 \*Endurance/
- 48 Walking/
- 49 Stretching exercise/

- 50 Tai Chi/
- 51 Qigong/
- 52 Yoga/
- 53 Sedentary lifestyle/
- 54 (physical fitness or physical exertion or physical endurance or muscle stretching exercise\$ or recreational activit\$ or household activit\$ or occupational activit\$ or physical activit\$ or physical inactivit\$ or exercise\$ or exercising or energy intake or energy expenditure or energy balance or energy density or sedentar\$ or standing or sitting or television viewing or aerobic activit\$ or cardiovascular activit\$ or endurance activit\$ or resistance training or strength training or physical conditioning or functional training or leisure time physical activit\$ or lifestyle activit\$ or qigong or tai chi or tai ji or yoga or free living activit\$ or walk or walking).ab,ti.
- 55 45 or 46 or 47 or 48 or 49 or 50 or 51 or 52 or 53 or 54
- 56 Body weight/
- 57 Anthropometry/
- 58 Body Composition/
- 59 Body Constitution/
- 60 Body size/
- 61 (weight or weight loss or weight gain or anthropometry or birth weight or birthweight or birth weight or child development or height or body composition or fat distribution or body mass or BMI or obesity or obese or overweight or over weight or skinfold measurement\$ or skinfold thickness or DEXA or bio-impedence or waist circumference or hip circumference or waist hip ratio\$ or body size).ab,ti.
- 62 56 or 57 or 58 or 59 or 60 or 61
- 63 18 or 22 or 25 or 30 or 33 or 36 or 41 or 44 or 55 or 62
- 64 exp animal/
- 65 exp human/
- 66 64 not 65
- 67 63 not 66

**Combined**

- 68 10 and 14 and 67

**Supplementary Table S3. Description of the potential influential sources of bias in cancer survival studies**

| Bias type                                                                                      | Description                                                                                                                                                                                                                                                                                                                                                                                                                                                                                                                                                                                                                                                                                                                                                                                                                                                                                                                                                                                                                                                                                                                                                                                                                     |
|------------------------------------------------------------------------------------------------|---------------------------------------------------------------------------------------------------------------------------------------------------------------------------------------------------------------------------------------------------------------------------------------------------------------------------------------------------------------------------------------------------------------------------------------------------------------------------------------------------------------------------------------------------------------------------------------------------------------------------------------------------------------------------------------------------------------------------------------------------------------------------------------------------------------------------------------------------------------------------------------------------------------------------------------------------------------------------------------------------------------------------------------------------------------------------------------------------------------------------------------------------------------------------------------------------------------------------------|
| Selection bias                                                                                 | <p>Bias resulting from the inclusion in the analyses of participants who are different from the source population.</p> <p>Bias could arise from non-random allocation (in randomised clinical trials), self-selection, survival bias or differential loss to follow-up.</p>                                                                                                                                                                                                                                                                                                                                                                                                                                                                                                                                                                                                                                                                                                                                                                                                                                                                                                                                                     |
| <p>Information bias</p> <p>- Exposure measurement error</p> <p>- Outcome measurement error</p> | <p>Errors in measuring or classifying the exposures and outcomes</p> <ol style="list-style-type: none"> <li>1. The tool or method used to assess the exposure (or confounders) results in inaccurate measurement of exposures with regards to the actual value of the measure. The possibility of measurement error mainly arises from non-valid assessment methods.</li> <li>2. Bias may also occur due to deviations from the assigned exposures measurements, for instance, when the exposures may change over time, but it is only measured using a single baseline measurement. It could be minimised by updating the exposure at multiple follow-up times.</li> <li>3. Immortal time bias. It could arise when the non-exposed person-time is classified erroneously</li> </ol> <ol style="list-style-type: none"> <li>1. Detection bias due to different assessment methods across exposed and non-exposed groups. Recurrence is more likely to be affected by this bias than mortality.</li> <li>2. Systematic measurement error of the outcome related to the exposure. For example, differential attendance to clinical examinations for recurrence detection related to the lifestyle of the participants</li> </ol> |
| Residual confounding                                                                           | <p>Bias arising when common risk factors between the exposure and outcome are missing as covariates in the analysis</p> <ol style="list-style-type: none"> <li>1. Cancer stage and treatment affect the risk of mortality and/or recurrence and are associated with the exposures.</li> </ol>                                                                                                                                                                                                                                                                                                                                                                                                                                                                                                                                                                                                                                                                                                                                                                                                                                                                                                                                   |

**Supplementary Table S4. Grading criteria for evidence on diet, nutrition, physical activity and survival in women with breast cancer**

| Evidence grades         |                                            | GRADING CRITERIA FOR EVIDENCE ON DIET, NUTRITION, PHYSICAL ACTIVITY AND SURVIVAL IN WOMEN WITH BREAST CANCER                                                                                                                                                                                                                                                        | Het  | PB | Mec          |
|-------------------------|--------------------------------------------|---------------------------------------------------------------------------------------------------------------------------------------------------------------------------------------------------------------------------------------------------------------------------------------------------------------------------------------------------------------------|------|----|--------------|
| <b>Strong evidence</b>  | <b>Convincing</b>                          | Evidence of an effect from a meta-analysis of RCTs or at least two well-designed independent RCTs                                                                                                                                                                                                                                                                   | No   | No | Desirable    |
|                         | <b>Probable</b>                            | Evidence of an effect from a meta-analysis of RCTs or two well-designed RCTs                                                                                                                                                                                                                                                                                        | Some | No | Desirable    |
|                         |                                            | <b>OR</b> Evidence of an effect from one well-designed RCT and one well-designed cohort study                                                                                                                                                                                                                                                                       | No   | No | Required     |
|                         |                                            | <b>OR</b> Evidence from at least one well-designed pooled analysis of follow-up studies                                                                                                                                                                                                                                                                             | No   | No | Required     |
|                         |                                            | <b>OR</b> Evidence from at least two independent well-designed follow-up studies                                                                                                                                                                                                                                                                                    | No   | No | Required     |
| <b>Limited evidence</b> | <b>Limited suggestive</b>                  | Evidence from a meta-analysis of RCTs or at least two well-designed RCTs but the confidence interval may include the null                                                                                                                                                                                                                                           | Some | No | Not required |
|                         |                                            | <b>OR</b> Evidence from one well-designed RCT but the confidence interval may include the null                                                                                                                                                                                                                                                                      | No   | No | Required     |
|                         |                                            | <b>OR</b> Evidence of an effect from a pooled analysis of follow-up studies                                                                                                                                                                                                                                                                                         | Some | No | Not required |
|                         |                                            | <b>OR</b> Evidence from a pooled analysis of follow-up studies but the confidence interval may include the null                                                                                                                                                                                                                                                     | Some | No | Required     |
|                         |                                            | <b>OR</b> Evidence of an effect from at least one follow-up study                                                                                                                                                                                                                                                                                                   | No   | No | Required     |
|                         |                                            | <b>OR</b> Evidence of an effect from at least two follow-up studies                                                                                                                                                                                                                                                                                                 | No   | No | Not required |
|                         |                                            | <b>OR</b> Evidence from at least two follow-up studies but the confidence interval may include the null                                                                                                                                                                                                                                                             | Some | No | Required     |
|                         | <b>Limited – no conclusion</b>             | Any of the following reasons:<br>- Too few studies available<br>- Inconsistency of direction of effect<br>- Poor quality of studies                                                                                                                                                                                                                                 | -    | -  | -            |
| <b>Strong evidence</b>  | <b>Substantial effect on risk unlikely</b> | Evidence of the absence of an effect (a summary estimate close to 1.0) from any of the following:<br>a) A meta-analysis of RCTs<br>b) At least two well-designed independent RCTs<br>c) A well-designed pooled analysis of follow-up studies<br>d) At least two well-designed follow-up studies<br>- Absence of a dose response relationship (in follow-up studies) | No   | -  | Absence      |

**Het:** Substantial unexplained heterogeneity or some unexplained heterogeneity

**PB:** Publication bias

**Mec:** Strong and plausible mechanistic evidence is required, desirable but not required, not required, or absent

**Special upgrading factors:**

- Presence of a plausible biological gradient ('dose response') in the association. Such a gradient need not be linear or even in the same direction across the different levels of exposure, so long as this can be explained plausibly.
- A particularly large summary effect size (a relative risk of 2.0 or more, or 0.5 or less, depending on the unit of exposure), after appropriate control for confounders.
- Evidence from appropriately controlled experiments demonstrating one or more plausible and specific mechanisms.

- All plausible known residual confounders or biases including reverse causation would reduce a demonstrated effect, or suggest a spurious effect when results show no effect. Special considerations important for evidence for breast cancer survivors including the following potential confounding variables – the type of tumour, type of treatment, amount of treatment received, and the dissemination of the disease.



**Supplementary Table S5. Study characteristics of the included dietary intervention trials in breast cancer survivors**

| Author, Year, Study name, Country                                                 | Characteristics of study population                                                                                                             | Intervention and timeframe           | Follow-up time, Compliance                                                                                                                                                                          | Outcome                                                                                                                                                                    | Intervention vs control group                                                                                                                              | RR (95% CI)                                                                                                                                                                                               | Adjustments                                                         |
|-----------------------------------------------------------------------------------|-------------------------------------------------------------------------------------------------------------------------------------------------|--------------------------------------|-----------------------------------------------------------------------------------------------------------------------------------------------------------------------------------------------------|----------------------------------------------------------------------------------------------------------------------------------------------------------------------------|------------------------------------------------------------------------------------------------------------------------------------------------------------|-----------------------------------------------------------------------------------------------------------------------------------------------------------------------------------------------------------|---------------------------------------------------------------------|
| Reddy <sup>1</sup> 2005, WINS, USA (superseded by Chlebowski <sup>2</sup> , 2006) | Early-stage breast cancer (n=2437)<br>Age:48-79 years                                                                                           | Reducing fat intake to 15% of energy | Median 5 years                                                                                                                                                                                      | Secondary endpoint:<br>Overall survival<br><br>Primary endpoint:<br>Relapse-free survival events<br>Overall ER+<br>ER-<br><br>Secondary endpoint:<br>Disease-free survival | Reduced fat diet (n=975) vs comparison (minimal dietary counselling) (n=1,462)                                                                             | Overall survival<br>0.89 (0.65-1.21)<br><br>Relapse-free survival<br>0.76 (0.60-0.98)<br>0.85 (0.63-1.14)<br>0.58 (0.37-0.91)<br><br>Disease-free survival<br>0.81 (0.65-0.99)                            |                                                                     |
| Chlebowski <sup>2</sup> , 2006 WINS, USA                                          | Stage I-IIIa breast cancer (n=2,437)<br>Age:48-79 years<br>Peri- and postmenopausal women<br>Recruited within 1 year of breast cancer diagnosis | Reducing fat intake to 15% of energy | Median 60 months<br>Intervention: 45 lost and 170 withdrew<br>Comparison: 66 lost and 106 withdrew<br>Adherence: 80% of women provided dietary data for at least three time periods after baseline. | Secondary endpoint:<br>Overall survival (34 deaths without breast cancer recurrence)<br>Primary endpoint:<br>Relapse-free survival events:<br>277 events                   | Reduced fat diet (n=975) vs comparison (minimal dietary counselling) (n=1,462)<br><br>Overall ER positive<br>ER negative<br><br>PR positive<br>PR negative | Overall survival:<br>0.89 (0.65-1.21)<br><br>Relapse-free survival:<br>0.76 (0.60-0.98)<br>0.85 (0.63-1.14)<br>0.58 (0.37-0.91)<br>(P for interaction – 0.15)<br><br>0.83 (0.59-1.15)<br>0.54 (0.35-0.83) | Nodal status, systemic adjuvant therapy, tumor size, and mastectomy |

| Author, Year, Study name, Country             | Characteristics of study population                                                                                                                | Intervention and timeframe                                                | Follow-up time, Compliance                                                                        | Outcome                                                                      | Intervention vs control group                                                                                                                                                                                    | RR (95% CI)                                                                                                                                                                                                                                                                                                                                                                   | Adjustments                                                                                             |
|-----------------------------------------------|----------------------------------------------------------------------------------------------------------------------------------------------------|---------------------------------------------------------------------------|---------------------------------------------------------------------------------------------------|------------------------------------------------------------------------------|------------------------------------------------------------------------------------------------------------------------------------------------------------------------------------------------------------------|-------------------------------------------------------------------------------------------------------------------------------------------------------------------------------------------------------------------------------------------------------------------------------------------------------------------------------------------------------------------------------|---------------------------------------------------------------------------------------------------------|
|                                               |                                                                                                                                                    |                                                                           |                                                                                                   |                                                                              | ER+/PR+<br>ER+/PR-<br>ER-/PR+<br>ER-/PR-                                                                                                                                                                         | 0.83 (0.58-1.17)<br>0.73 (0.37-1.46)<br>0.57 (0.17-1.87)<br>0.44 (0.25-0.77)                                                                                                                                                                                                                                                                                                  |                                                                                                         |
| Pierce, 2007 <sup>3</sup> (a)<br>WHEL,<br>USA | Stage I-IIIa breast cancer (n=3,080)<br>Age:18-70 years<br>Pre-and postmenopausal women<br><br>Recruited within 4 years of breast cancer diagnosis | Diet rich in fruits, vegetables and fibre, and 15 to 20 % energy from fat | Mean 7.3 years<br>Intervention: 16 lost and 22 withdrew<br><br>Comparison: 8 lost and 19 withdrew | Overall survival: 315 deaths<br><br>Disease-free survival events: 518 events | Healthy pattern (n=1,537) vs. comparison (minimal dietary counselling) (n=1,551) (5-a-day dietary advice)<br>ER+/PR+<br>ER+/PR-<br>ER-/PR+<br>ER-/PR-<br><br>Overall<br>ER+/PR+<br>ER+/PR-<br>ER-/PR+<br>ER-/PR- | Overall survival:<br>Overall:<br>0.91 (0.72-1.15)<br>(P = 0.43)<br><br>By cancer types:<br>0.92 (0.68-1.26)<br>1.03 (0.57-1.85)<br>1.08 (0.41-2.83)<br>1.13 (0.74-1.73)<br><br>(P for interaction = 0.88)<br><br>Disease-free survival:<br>0.96 (0.80-1.14)<br>0.95 (0.76-1.20)<br>0.97 (0.60-1.56)<br>0.89 (0.42-1.88)<br>1.14 (0.80-1.61)<br><br>(P for interaction = 0.85) | Stratified by tumour stage, age, and clinical site; adjusted for antioestrogen use, oophorectomy status |

| Author, Year, Study name, Country                                    | Characteristics of study population                                                     | Intervention and timeframe                                                                                                                                  | Follow-up time, Compliance | Outcome                                                                                                                                                             | Intervention vs control group                                                                                                                                                    | RR (95% CI)                                                                                     | Adjustments                                                                                                                                               |
|----------------------------------------------------------------------|-----------------------------------------------------------------------------------------|-------------------------------------------------------------------------------------------------------------------------------------------------------------|----------------------------|---------------------------------------------------------------------------------------------------------------------------------------------------------------------|----------------------------------------------------------------------------------------------------------------------------------------------------------------------------------|-------------------------------------------------------------------------------------------------|-----------------------------------------------------------------------------------------------------------------------------------------------------------|
| Gold, 2009 <sup>4</sup><br>Secondary analysis of the WHEL study, USA | Stage I-IIIa breast cancer (n=2,967)<br>Age: 18-79 years<br>Within 4 years of diagnosis | Consume low-fat diet high in vegetables, fruit, and fiber                                                                                                   | 7.3 years                  | Additional breast cancer events (n=179)<br>No hot flushes reported at baseline<br><br>Additional breast cancer events (n = 313)<br>hot flushes reported at baseline |                                                                                                                                                                                  | 0.69 (0.51-0.93)<br>P= 0.02<br><br>0.77 (0.59-1.00)<br>P=0.05                                   | Menopausal status, tumor size and grade, number of positive lymph nodes, hormone receptor status, antiestrogen therapy, quality of life and clinical site |
| Pierce, 2009 <sup>5</sup><br>WHEL, USA                               | Early stage breast cancer (n=869)<br>< 4 years                                          | Daily intake of 5 vegetable servings, 16 oz of vegetable juice or vegetable servings equivalents, 3 fruit servings, 30 g fiber, and 15–20% energy from fat) | 7.3 years                  | Primary endpoint:<br>Additional breast cancer events (n=179)<br>Women without hot flushes                                                                           | Vegetables-fruits Q4 vs Q1<br>Intervention (n=72) vs Comparison (n=107)<br><br>Fibre<br>Q4 vs Q1<br>Intervention (n=72) vs Comparison (n=107)<br><br>Energy from fat<br>Q4 vs Q1 | 0.41 (0.19-0.86)<br>P=0.01<br><br>0.48 (0.26, 0.87)<br>P=0.02<br><br>0.75 (0.4, 1.43)<br>P=0.06 | Stage and grade of original tumour and antiestrogen therapy                                                                                               |

| Author, Year, Study name, Country                                                      | Characteristics of study population | Intervention and timeframe                        | Follow-up time, Compliance | Outcome                                 | Intervention vs control group                                                                                 | RR (95% CI)               | Adjustments                                           |
|----------------------------------------------------------------------------------------|-------------------------------------|---------------------------------------------------|----------------------------|-----------------------------------------|---------------------------------------------------------------------------------------------------------------|---------------------------|-------------------------------------------------------|
|                                                                                        |                                     |                                                   |                            |                                         | Intervention (n=72) vs Comparison (n=107)<br><br>Fibre-to-fat ratio Intervention (n=72) vs Comparison (n=107) | 0.38 (0.19-0.77)<br>=0.01 |                                                       |
| Rock <sup>6</sup> , 2009<br>WHEL,<br>USA<br>(superseded by Pierce, 2007 <sup>3</sup> ) | (n=3043)<br>mean age:51.3 years     | Low-fat diet high in vegetables, fruit, and fiber | Mean 7.12 years            | Additional breast cancer events (n=508) | Reduced fat diet vs comparison                                                                                | 1.06 (0.89-1.27)          | Stage, grade, tamoxifen use, plasma total carotenoids |

Abbreviations: WHEL; Women's Healthy Eating and Living, WHI, Women's Health Initiative, WINS, Women's Intervention Nutrition

**Supplementary Table S6. Main characteristics of dietary patterns of the included observational studies of dietary patterns, lifestyle scores and breast cancer prognosis**

| <b>PATTERNS</b>                                                                                                                                                                                                                                                                                                                                                                                                       | <b>Study, author, year</b>                                                                     |
|-----------------------------------------------------------------------------------------------------------------------------------------------------------------------------------------------------------------------------------------------------------------------------------------------------------------------------------------------------------------------------------------------------------------------|------------------------------------------------------------------------------------------------|
| <b>DATA-DRIVEN DIETARY PATTERNS</b>                                                                                                                                                                                                                                                                                                                                                                                   |                                                                                                |
| <b>Prudent pattern</b>                                                                                                                                                                                                                                                                                                                                                                                                |                                                                                                |
| Higher prudent pattern scores indicate diet with higher amounts of fruit, vegetables, whole grains, protein and fibre and low-fat dairy products, lower amounts of trans-unsaturated and saturated fats, lower glycaemic load                                                                                                                                                                                         | NHS Kroenke <sup>7</sup> , 2005(a)                                                             |
| Higher prudent pattern scores indicate a diet with higher intakes of fruits, vegetables, whole grains, and poultry                                                                                                                                                                                                                                                                                                    | LACE Kwan <sup>8</sup> , 2009                                                                  |
| Higher scores indicate a diet with higher intakes of leafy vegetables, non-leafy vegetables, fruits, potatoes and legumes                                                                                                                                                                                                                                                                                             | HKNKBCSS Lei <sup>9</sup> , 2021                                                               |
| <b>Western pattern</b>                                                                                                                                                                                                                                                                                                                                                                                                |                                                                                                |
| Higher western pattern scores indicate a diet with higher amounts of refined grains, red and processed meats, high-fat dairy, desserts, trans- and saturated fats, higher glycaemic load, and less protein and fibre                                                                                                                                                                                                  | NHS Kroenke <sup>7</sup> , 2005(a)                                                             |
| Higher western pattern scores indicate a diet with higher intakes of refined grains, red and processed meats                                                                                                                                                                                                                                                                                                          | LACE Kwan <sup>8</sup> , 2009                                                                  |
| Higher western pattern scores indicate a diet with high intakes of refined grain, red meat, oil, fish and seafood, cakes and snacks, cessed meat and eggs                                                                                                                                                                                                                                                             | HKNKBCSS Lei <sup>9</sup> , 2021                                                               |
| <b>LIFESTYLE PATTERN INDICES (DIET AND OTHER LIFESTYLE FACTORS)</b>                                                                                                                                                                                                                                                                                                                                                   |                                                                                                |
| <b>World Cancer Research Fund (WCRF) Score</b>                                                                                                                                                                                                                                                                                                                                                                        |                                                                                                |
| Higher score indicates higher concordance with the 2007 WCRF guidelines for cancer prevention; include recommendations for BMI, physical activity level, intakes of sugary beverages, fruit and vegetables, fibre, red and processed meats, alcohol, and sodium                                                                                                                                                       | IWHS Inoue-Choi <sup>10</sup> , 2013                                                           |
| <b>Healthy lifestyle pattern</b>                                                                                                                                                                                                                                                                                                                                                                                      |                                                                                                |
| Adherence to high level of fruit and vegetables intake and high level of physical activity                                                                                                                                                                                                                                                                                                                            | WHEL (control group) Pierce, 200 <sup>117</sup> (b)                                            |
| <b>DIETARY PATTERN INDICES</b>                                                                                                                                                                                                                                                                                                                                                                                        |                                                                                                |
| <b>Dietary inflammatory index (DII)</b>                                                                                                                                                                                                                                                                                                                                                                               |                                                                                                |
| Higher DII score indicate a more pro-inflammatory diet. Calculated using nutrients and bioactive compounds reported to be associated with biomarkers of inflammation: carbohydrate, protein, total fat, fibre, cholesterol, SFA, MUFA, PUFA, n-3 PUFA, n-6 PUFA, thiamine, riboflavin, niacin, vitamins B6, B12, A, C, D and E, carotene, folic acid, iron, magnesium, zinc, selenium, pepper, onion, garlic, ginger, | Jang <sup>12</sup> , 2018;<br>WHI Zheng <sup>13</sup> , 2018<br>PLCO Wang <sup>14</sup> , 2020 |

|                                                                                                                                                                                                                                                                                                                                                                                   |                                                                                                                                     |
|-----------------------------------------------------------------------------------------------------------------------------------------------------------------------------------------------------------------------------------------------------------------------------------------------------------------------------------------------------------------------------------|-------------------------------------------------------------------------------------------------------------------------------------|
| turmeric, alcohol, caffeine, and green tea and in the WHI also ginger, turmeric and pepper                                                                                                                                                                                                                                                                                        |                                                                                                                                     |
| <b>American Cancer Society (ACS) guidelines diet score</b>                                                                                                                                                                                                                                                                                                                        |                                                                                                                                     |
| Higher score indicates higher conformance with the ACS Nutrition and Physical Activity Guidelines for Cancer Prevention for intakes of fruits and vegetables, whole grains, and red and processed meats                                                                                                                                                                           | CPS-II<br>McCullough <sup>15</sup> , 2016<br><br>The Pathways study Ergas <sup>16</sup> , 2021                                      |
| <b>Healthy Eating Index (HEI)-2005</b>                                                                                                                                                                                                                                                                                                                                            |                                                                                                                                     |
| Higher score indicates higher conformance with the Dietary Guidelines for Americans-2005; use an energy-adjusted density approach for intakes of total fruit; whole fruit; total vegetables; dark-green vegetables, orange vegetables, legumes; total grains; whole grains, milk; meats; beans; oils; saturated fat; sodium and calories from solid fat, alcohol, and added sugar | HEAL George <sup>17</sup> , 2011 WHI<br>George <sup>18</sup> , 2014(a)<br><br>NHANES III<br><br>Karavasiloglou <sup>19</sup> , 2019 |
| <b>Healthy Eating Index (HEI)-2010</b>                                                                                                                                                                                                                                                                                                                                            |                                                                                                                                     |
| Higher score indicates higher conformance with the Dietary Guidelines for Americans 2010 using a density approach for intakes of total fruit; whole fruit; total vegetables; green vegetables beans; total protein foods; seafood, plant proteins, whole grains; dairy; fatty acids, refined grains, sodium and empty calories in the.                                            | WHI Sun <sup>20</sup> , 2018(a)                                                                                                     |
| <b>Healthy Eating Index (HEI)-2015</b>                                                                                                                                                                                                                                                                                                                                            |                                                                                                                                     |
| Higher score indicates higher conformance with the Dietary Guidelines for Americans 2015. Component densities were derived for total fruits, whole fruits, total vegetables, greens and beans, dairy, total protein, seafood and plant protein, refined grains, added sugars, fatty acids, sodium, and saturated fats                                                             | SBCSS Wang <sup>21</sup> , 2020<br><br>The Pathways study Ergas <sup>16</sup> , 2021                                                |
| <b>Alternative Healthy Eating Index (AHEI)</b>                                                                                                                                                                                                                                                                                                                                    |                                                                                                                                     |
| Adapted from the original HEI. Based on intakes of vegetables, fruits, nuts and soy, cereal fibre, ratio of white to red meat, trans fat, polyunsaturated: saturated fat ratio, alcohol, and duration of multivitamin use. A higher score indicates better diet quality                                                                                                           | NHS Kim <sup>22</sup> , 2011                                                                                                        |
| <b>Alternative Healthy Eating Index (AHEI)-2010</b>                                                                                                                                                                                                                                                                                                                               |                                                                                                                                     |
| Alternative to the HEI. Based on fruits and nutrients predictive of chronic disease risks: vegetables, fruits, whole grains, sugar-sweetened beverages, nuts and legumes, red and processed meats, trans Fats, long-chain (n-3) fats (EPA + DHA), and polyunsaturated fats, and alcohol                                                                                           | NHS Izano <sup>23</sup> , 2013                                                                                                      |
| <b>Diet quality index-revised (DQI-R)</b>                                                                                                                                                                                                                                                                                                                                         |                                                                                                                                     |
| Higher score indicated higher diet diversity and moderation based on intakes of grains, vegetables, fruits, total fat, saturated fat, cholesterol, iron, calcium, diet diversity, added fat and sugar                                                                                                                                                                             | NHS Kim <sup>22</sup> , 2011                                                                                                        |

|                                                                                                                                                                                                                                                                                                                                                                                                                                                                                                                                                                                                                                                                                                        |                                                                                                                    |
|--------------------------------------------------------------------------------------------------------------------------------------------------------------------------------------------------------------------------------------------------------------------------------------------------------------------------------------------------------------------------------------------------------------------------------------------------------------------------------------------------------------------------------------------------------------------------------------------------------------------------------------------------------------------------------------------------------|--------------------------------------------------------------------------------------------------------------------|
| <b>Recommended food score (RFS)</b>                                                                                                                                                                                                                                                                                                                                                                                                                                                                                                                                                                                                                                                                    |                                                                                                                    |
| Higher score indicates conformance to recommended foods. Calculated from intakes of fruits, vegetables, whole grains, low saturated fat proteins, and low fat dairy products                                                                                                                                                                                                                                                                                                                                                                                                                                                                                                                           | NHS Kim <sup>22</sup> , 2011                                                                                       |
| <b>Dietary Approaches to Stop Hypertension (DASH)</b>                                                                                                                                                                                                                                                                                                                                                                                                                                                                                                                                                                                                                                                  |                                                                                                                    |
| Higher score indicates more healthy eating pattern as recommended by the United States Department of Agriculture (more plant proteins, fruits and vegetables, moderate amounts of low-fat dairy products, and low amounts of sweets and sodium)                                                                                                                                                                                                                                                                                                                                                                                                                                                        | NHS Izano <sup>23</sup> , 2013<br>SBCSS Wang <sup>21</sup> , 2020<br>The Pathways study Ergas <sup>16</sup> , 2021 |
| <b>Alternate Mediterranean Diet Score (aMED)</b>                                                                                                                                                                                                                                                                                                                                                                                                                                                                                                                                                                                                                                                       |                                                                                                                    |
| Higher score is higher conformance to Mediterranean dietary pattern. Modified from the Mediterranean Score and calculated from intakes of vegetables, legumes, fruits, nuts, whole grains, fish, monounsaturated: saturated fat ratio, meat and dairy, and alcohol                                                                                                                                                                                                                                                                                                                                                                                                                                     | NHS Kim <sup>22</sup> , 2011<br>The Pathways study Ergas <sup>16</sup> , 2021                                      |
| <b>Trichopoulou Mediterranean Diet Score (MedDiet)</b>                                                                                                                                                                                                                                                                                                                                                                                                                                                                                                                                                                                                                                                 |                                                                                                                    |
| Higher score is higher conformance to Mediterranean dietary pattern calculated from intakes of legumes, vegetables, fruit and nuts, cereals, fish and seafood, meat and meat products, dairy products, the ratio of monounsaturated to saturated fats and alcohol                                                                                                                                                                                                                                                                                                                                                                                                                                      | NHANES III<br>Karavasiloglou <sup>19</sup> , 2019                                                                  |
| <b>Chinese Food Pagoda (CHFP)-2007 and 2016</b>                                                                                                                                                                                                                                                                                                                                                                                                                                                                                                                                                                                                                                                        |                                                                                                                    |
| Higher score is higher conformance to the Chinese food pagoda pattern. Calculated from salt, fats and oil, dairy products, beans, meat and poultry, fish, eggs, vegetables, fruits and grains                                                                                                                                                                                                                                                                                                                                                                                                                                                                                                          | SBCSS Wang <sup>21</sup> , 2020                                                                                    |
| <b>Diabetes risk reduction diet (DRRD)</b>                                                                                                                                                                                                                                                                                                                                                                                                                                                                                                                                                                                                                                                             |                                                                                                                    |
| Higher score is higher conformance to the diabetes risk reduction diet. Calculated from intakes of cereal fiber, coffee (caffeinated and decaffeinated), nuts, polyunsaturated:saturated fat ratio, whole fruits, glycemic index, trans-fat, SSBs/fruit juices, and red meat                                                                                                                                                                                                                                                                                                                                                                                                                           | NHSI and II Wang <sup>24</sup> , 2021                                                                              |
| <b>Plant-based dietary index (PDI)</b>                                                                                                                                                                                                                                                                                                                                                                                                                                                                                                                                                                                                                                                                 |                                                                                                                    |
| Higher score is higher conformance to a plant-based dietary index. Calculated from intakes of whole grains, fruits, vegetables, nuts, legumes, vegetable oils, tea, and coffee, fruit juices, refined grains, potatoes, sugar-sweetened beverages, sweets and desserts, dairy, animal fat, egg, meat, fish or seafood, and miscellaneous animal-based foods.<br><br>For PDI, positive scores are assigned to all plant foods. For healthy PDI, positive scores are assigned to healthful plant foods, and reverse scores are assigned to unhealthful plant foods. For unhealthy PDI, positive scores are assigned to unhealthful plant foods, and reverse scores are assigned to healthful plant foods | Pathways Study Anyene <sup>25</sup> , 2021                                                                         |

|                                                                                                                             |                              |
|-----------------------------------------------------------------------------------------------------------------------------|------------------------------|
| <b>Potential renal acid load (PRAL)</b>                                                                                     |                              |
| Higher score indicates a more acid-forming potential. Calculated from protein, phosphorus, potassium, magnesium and calcium | WHEL Wu <sup>26</sup> , 2020 |
| <b>Endogenous acid production (NEAP)</b>                                                                                    |                              |
| Higher score indicates a more acid-forming potential. Calculated from protein and potassium                                 | WHEL Wu <sup>26</sup> , 2020 |

Abbreviations: CPS-II, Cancer Prevention Study II Nutrition Cohort; HEAL, Health, Eating, Activity, and Lifestyle Study; HKNKBCSS, Hong Kong NTEC-KWC Breast Cancer Survival Study; IWHS, Iowa Women's Health Study; LACE, Life After Cancer Epidemiology; NHANES, National Health and Nutrition Examination Survey; NHS, Nurses' Health Study; PLCO, Prostate, Lung, Colorectal, and Ovarian Cancer Screening Trial; SBCSS, Shanghai Breast Cancer Study; WHEL; Women's Healthy Eating and Living, WHI, Women's Health Initiative



**Supplementary Table S7. Descriptive table of the included observational studies of post-diagnosis dietary patterns, lifestyle scores and breast cancer prognosis**

| Author, year, study name, country, WCRF Code              | Study description                                                                                        | Time of diagnosis and follow-up                                  | Disease characteristics treatment | Exposure assessment                                                           | Outcome (Events)                         | Contrast       | RR (95% CI)                       | Covariates                                                                                                                               |
|-----------------------------------------------------------|----------------------------------------------------------------------------------------------------------|------------------------------------------------------------------|-----------------------------------|-------------------------------------------------------------------------------|------------------------------------------|----------------|-----------------------------------|------------------------------------------------------------------------------------------------------------------------------------------|
| <b>Dietary Inflammatory Index (DII)</b>                   |                                                                                                          |                                                                  |                                   |                                                                               |                                          |                |                                   |                                                                                                                                          |
| Jang <sup>12</sup> 2018, South Korea                      | Prospective cohort of cancer survivors (n=511), mean age: 51.9 years, race: mostly Asian                 | Diagnosis: 2000-2017, follow-up: median 63 months, until 2018    | Stage 0-III                       | 24h recall, interviewed by trained dietitian at 5.4 months post-diagnosis     | All-cause mortality (n=44)               | 5.48 vs. -5.87 | 0.32 (1.11-0.93)<br>P trend=0.041 | Age, BMI, postmenopausal status, subtype, histological grade, tumour size, lymph node metastasis, AJCC stage, treatment, energy intake   |
|                                                           |                                                                                                          |                                                                  |                                   |                                                                               | Recurrence (n=88)                        |                | 0.43 (0.21-0.85)<br>P trend=0.019 |                                                                                                                                          |
|                                                           |                                                                                                          |                                                                  |                                   |                                                                               | Pre-menopausal women, recurrence (n=50)  |                | 0.30 (0.12-0.80)<br>P trend=0.014 |                                                                                                                                          |
|                                                           |                                                                                                          |                                                                  |                                   |                                                                               | Post-menopausal women, recurrence (n=38) |                | 0.78 (0.25-2.44)<br>P trend=0.669 |                                                                                                                                          |
| <b>Energy-adjusted Dietary Inflammatory Index (E-DII)</b> |                                                                                                          |                                                                  |                                   |                                                                               |                                          |                |                                   |                                                                                                                                          |
| Zheng <sup>13</sup> 2018, WHI, USA                        | Population-based cohort study (n=2150), age range: 50-79 years, post-menopausal 100%, race: mostly White | Recruitment: 1993-1998, follow-up: median 13.3 years, until 2015 | Invasive breast cancer            | FFQ, self-administered at 1.5 years post-diagnosis, diet in the past 3 months | All-cause mortality (n=580)              | 3.79 vs. -6.81 | 0.82 (0.63-1.05)<br>P trend=0.17  | Age, ER status, race/ethnicity, PR status, smoking status, income, cancer stage, education, years from cancer diagnosis to FFQ, physical |
|                                                           |                                                                                                          |                                                                  |                                   |                                                                               | Breast cancer-specific mortality (n=212) |                | 0.96 (0.62-1.49)<br>P trend=0.96  |                                                                                                                                          |
|                                                           |                                                                                                          |                                                                  |                                   |                                                                               | Cardiovascular disease mortality (n=103) |                | 0.44 (0.24-0.82)<br>P trend=0.005 |                                                                                                                                          |

| Author, year, study name, country, WCRF Code | Study description                                                                          | Time of diagnosis and follow-up             | Disease characteristic s treatment                                                            | Exposure assessment                                        | Outcome (Events)                                                       | Contrast          | RR (95% CI)                      | Covariates                                                                                                                                                                               |
|----------------------------------------------|--------------------------------------------------------------------------------------------|---------------------------------------------|-----------------------------------------------------------------------------------------------|------------------------------------------------------------|------------------------------------------------------------------------|-------------------|----------------------------------|------------------------------------------------------------------------------------------------------------------------------------------------------------------------------------------|
|                                              |                                                                                            |                                             |                                                                                               |                                                            |                                                                        |                   |                                  | activity, total energy intake, BMI, hormone replacement therapy use                                                                                                                      |
| Wang 2020 <sup>14</sup> , PLCO, USA          | Secondary analysis of clinical trials (n=1064), age range: 55-74 years, race: mostly White | Diagnosis: 1993-2001, follow-up: until 2011 | Invasive breast cancer in situ 20.1%, stage I 50.3%, II 26.6%, III 2.8%, ER+ 84.6%, PR+ 75.2% | FFQ, self-administered                                     | All-cause mortality (n=296)                                            | -4.1 vs -7.8      | 0.75 (0.55-0.99)                 | Age, BMI, diabetes, energy intake, ER status, hormone therapy, income, marital status, physical activity, PR status, race, smoking, stage, study arm, years from cancer diagnosis to FFQ |
|                                              |                                                                                            |                                             |                                                                                               |                                                            | Cancer specific mortality (n=100) ( <u>Competing risk regression</u> ) |                   | 0.68 (0.41-1.12)                 |                                                                                                                                                                                          |
|                                              |                                                                                            |                                             |                                                                                               |                                                            | All-cause mortality (n=296)                                            | Per 1 unit        | 0.94 (0.88-1.00)                 |                                                                                                                                                                                          |
|                                              |                                                                                            |                                             |                                                                                               |                                                            | Cancer specific mortality (n=100) ( <u>Competing risk regression</u> ) | 0.91 (0.82-1.00)  |                                  |                                                                                                                                                                                          |
| <b>Healthy Eating Index (HEI) 2015</b>       |                                                                                            |                                             |                                                                                               |                                                            |                                                                        |                   |                                  |                                                                                                                                                                                          |
| Wang 2020 <sup>21</sup> , SBCS, China        | Prospective cohort of cancer survivors (n=3450), age range: 25-70 years, pre- and          | Diagnosis: 2002-2006, follow-up: until 2017 | Stage I-IV                                                                                    | Semi-quantitative FFQ, 93 items, diet during the 12 months | Overall survival (n=374)                                               | 65.8 vs 38 points | 0.79 (0.57-1.10)<br>P trend=0.19 | Age, BMI, chemotherapy, comorbidity, education, energy intake, er status, her2                                                                                                           |
|                                              |                                                                                            |                                             |                                                                                               |                                                            | Breast cancer-specific mortality (n=252)                               |                   | 0.86 (0.58-1.27)<br>P trend=0.31 |                                                                                                                                                                                          |

| Author, year, study name, country, WCRF Code  | Study description                                                                                     | Time of diagnosis and follow-up                                 | Disease characteristic s treatment                                                                               | Exposure assessment                               | Outcome (Events)                         | Contrast          | RR (95% CI)                      | Covariates                                                                                                                                                                                                |
|-----------------------------------------------|-------------------------------------------------------------------------------------------------------|-----------------------------------------------------------------|------------------------------------------------------------------------------------------------------------------|---------------------------------------------------|------------------------------------------|-------------------|----------------------------------|-----------------------------------------------------------------------------------------------------------------------------------------------------------------------------------------------------------|
|                                               | post-menopausal, race: Chinese                                                                        |                                                                 |                                                                                                                  | preceding a 5-year post-diagnosis survey          | Recurrence (n=228)                       |                   | 0.89 (0.59-1.33)<br>P trend=0.23 | status, immunotherapy, income, marital status, menopausal status, other factors, physical activity, pr status, radiotherapy, stage                                                                        |
|                                               |                                                                                                       |                                                                 |                                                                                                                  |                                                   | Overall survival (n=374)                 | Per 5 points      | 0.94 (0.85-1.03)                 |                                                                                                                                                                                                           |
|                                               |                                                                                                       |                                                                 |                                                                                                                  |                                                   | Breast cancer-specific mortality (n=252) |                   | 0.94 (0.83-1.06)                 |                                                                                                                                                                                                           |
|                                               |                                                                                                       |                                                                 |                                                                                                                  |                                                   | Recurrence (n=228)                       |                   | 0.92 (0.81-1.05)                 |                                                                                                                                                                                                           |
| Ergas <sup>16</sup> 2021, Pathways Study, USA | Prospective cohort of cancer survivors (n=3660), age range: 24-94 years, race: White, Black and Other | Diagnosis: 2005-2013, follow-up: 40888 person-years, until 2018 | Stage I 54.9%, II 34.3%, III 9.5%, IV 1.5%. ER+ 83.9%, ER- 16.0%. PR+ 64.1%, PR- 35.7%. HER2+ 12.9%, HER2- 83.2% | FFQ, diet at an average 2.3 months post-diagnosis | Overall survival (n=621)                 | 80 vs 42.1 points | 0.81 (0.62-1.06)<br>P trend=0.12 | Age, BMI, chemotherapy, education, er status, ethnicity, her2 status, hormonal therapy, menopausal status, physical activity, pr status, race, radiotherapy, smoking, stage, surgery, total energy intake |
|                                               |                                                                                                       |                                                                 |                                                                                                                  |                                                   | Cancer specific mortality (n=312)        |                   | 0.84 (0.56-1.27)<br>P trend=0.44 | Age, education, ER status,                                                                                                                                                                                |

| Author, year, study name, country, WCRF Code | Study description | Time of diagnosis and follow-up | Disease characteristics treatment | Exposure assessment | Outcome (Events)                  | Contrast    | RR (95% CI)                       | Covariates                                                                                                                                                                                                |
|----------------------------------------------|-------------------|---------------------------------|-----------------------------------|---------------------|-----------------------------------|-------------|-----------------------------------|-----------------------------------------------------------------------------------------------------------------------------------------------------------------------------------------------------------|
|                                              |                   |                                 |                                   |                     | Recurrence (n=449)                |             | 1.24 (0.88-1.75)<br>P trend=0.30  | ethnicity, HER2 status, Menopausal status, Physical activity, PR status, Race, Smoking, stage, total energy intake                                                                                        |
|                                              |                   |                                 |                                   |                     | Other causes of death (n=322)     |             | 0.67 (0.48-0.94)<br>P trend=0.006 |                                                                                                                                                                                                           |
|                                              |                   |                                 |                                   |                     | Overall survival (n=621)          | Per 1 point | 0.99<br>P trend=0.12              | Age, BMI, chemotherapy, education, er status, ethnicity, her2 status, hormonal therapy, menopausal status, physical activity, pr status, race, radiotherapy, smoking, stage, surgery, total energy intake |
|                                              |                   |                                 |                                   |                     | Cancer specific mortality (n=312) |             | 0.99<br>P trend=0.44              | Age, education, ER status, ethnicity,                                                                                                                                                                     |
|                                              |                   |                                 |                                   |                     | Recurrence (n=449)                |             | 1.01<br>P trend=0.30              |                                                                                                                                                                                                           |

| Author, year, study name, country, WCRF Code | Study description                                                                | Time of diagnosis and follow-up                         | Disease characteristic s treatment | Exposure assessment                                                      | Outcome (Events)                                                                                                   | Contrast                                                           | RR (95% CI)                                              | Covariates                                                                                                                                    |
|----------------------------------------------|----------------------------------------------------------------------------------|---------------------------------------------------------|------------------------------------|--------------------------------------------------------------------------|--------------------------------------------------------------------------------------------------------------------|--------------------------------------------------------------------|----------------------------------------------------------|-----------------------------------------------------------------------------------------------------------------------------------------------|
|                                              |                                                                                  |                                                         |                                    |                                                                          | Other causes of death (n=322)                                                                                      |                                                                    | 0.98<br>P trend=0.06                                     | HER2 status, Menopausal status, Physical activity, PR status, Race, Smoking, stage, total energy intake                                       |
|                                              |                                                                                  |                                                         |                                    |                                                                          | ER positive Overall survival (n=502)                                                                               | 80 vs 42.1 points                                                  | 0.80 (0.60-1.06)<br>P trend=0.03                         | Age, education, ER status, ethnicity, HER2 status, menopausal status, physical activity, PR status, race, smoking, stage, total energy intake |
|                                              |                                                                                  |                                                         |                                    | ER negative Overall survival (n=132)                                     | 0.73 (0.38-1.40)<br>P trend=0.99                                                                                   |                                                                    |                                                          |                                                                                                                                               |
|                                              |                                                                                  |                                                         |                                    |                                                                          | ER positive Overall survival (n=502)                                                                               | Per 1 point                                                        | 0.99<br>P trend=0.03                                     | Age, education, ER status, ethnicity, HER2 status, menopausal status, physical activity, PR status, race, smoking, stage, total energy intake |
|                                              |                                                                                  |                                                         |                                    | ER negative Overall survival (n=132)                                     | 1.00<br>P trend=0.99                                                                                               |                                                                    |                                                          |                                                                                                                                               |
| <b>Healthy Eating Index (HEI) 2010</b>       |                                                                                  |                                                         |                                    |                                                                          |                                                                                                                    |                                                                    |                                                          |                                                                                                                                               |
| Sun <sup>20</sup> 2018(a), WHI, USA          | Population-based cohort study (n=2295), post-menopausal 100%, race: mostly White | Recruitment: 1993-1998, follow-up: 12 years, until 2015 | Invasive breast cancer             | FFQ, 122 items, self-administered at an average 1.8 years post-diagnosis | All-cause mortality (n=763)<br>Breast cancer-specific mortality (n=242)<br>Non-breast-cancer-related death (n=521) | HEI 2010 score increase (≥15%) vs. no change or stable (+/- 14.9%) | 1.00 (0.81-1.23)<br>0.98 (0.67-1.44)<br>0.96 (0.74-1.23) | Age at diagnosis, pre-diagnosis HEI-2010 score, pre-diagnosis total energy intake, change in total energy                                     |

| Author, year, study name, country, WCRF Code | Study description | Time of diagnosis and follow-up | Disease characteristics treatment | Exposure assessment                      | Outcome (Events)           | Contrast                                                                         | RR (95% CI)      | Covariates                                                                                                                                                                                                                                                                                                                                                                    |
|----------------------------------------------|-------------------|---------------------------------|-----------------------------------|------------------------------------------|----------------------------|----------------------------------------------------------------------------------|------------------|-------------------------------------------------------------------------------------------------------------------------------------------------------------------------------------------------------------------------------------------------------------------------------------------------------------------------------------------------------------------------------|
|                                              |                   |                                 |                                   |                                          | All-cause mortality (n=75) | HEI 2010 score decrease ( $\geq 15\%$ ) vs. no change or stable ( $\pm 14.9\%$ ) | 1.26 (0.99-1.62) | intake, race, ethnicity, education, income, cancer stage, oestrogen receptor status, progesterone receptor status, time from diagnosis to dietary intake assessment, pre-diagnosis smoking status, post-diagnosis smoking status, pre-diagnosis physical activity, pre-diagnosis alcohol intake, pre-diagnosis BMI, physical activity, use of postmenopausal hormone therapy, |
|                                              |                   |                                 |                                   | Breast cancer-specific mortality (n=27)  | 1.67 (1.10-2.54)           |                                                                                  |                  |                                                                                                                                                                                                                                                                                                                                                                               |
|                                              |                   |                                 |                                   | Non-breast-cancer related death (n=48)   | 1.19 (0.87-1.62)           |                                                                                  |                  |                                                                                                                                                                                                                                                                                                                                                                               |
|                                              |                   |                                 |                                   | All-cause mortality (n=763)              | Q4 vs Q1                   | 0.82 (0.66-1.02)                                                                 |                  |                                                                                                                                                                                                                                                                                                                                                                               |
|                                              |                   |                                 |                                   | Breast cancer-specific mortality (n=242) |                            | 0.97 (0.66-1.43)                                                                 |                  |                                                                                                                                                                                                                                                                                                                                                                               |
|                                              |                   |                                 |                                   | Non-breast cancer-related death (n=521)  |                            | 0.72 (0.55-0.94)                                                                 |                  |                                                                                                                                                                                                                                                                                                                                                                               |

| Author, year, study name, country, WCRF Code | Study description                                                                                        | Time of diagnosis and follow-up                                                                                  | Disease characteristic s treatment | Exposure assessment                                                                  | Outcome (Events)                         | Contrast        | RR (95% CI)                       | Covariates                                                                                                                                 |
|----------------------------------------------|----------------------------------------------------------------------------------------------------------|------------------------------------------------------------------------------------------------------------------|------------------------------------|--------------------------------------------------------------------------------------|------------------------------------------|-----------------|-----------------------------------|--------------------------------------------------------------------------------------------------------------------------------------------|
|                                              |                                                                                                          |                                                                                                                  |                                    |                                                                                      |                                          |                 |                                   | alcohol intake, BMI                                                                                                                        |
| <b>Healthy Eating Index (HEI) 2005</b>       |                                                                                                          |                                                                                                                  |                                    |                                                                                      |                                          |                 |                                   |                                                                                                                                            |
| George <sup>18</sup> 2014(a), WHI, USA       | Population-based cohort study (n=2317), age range: 50-79 years, post-menopausal 100%, race: mostly White | Recruitment 1993-1998, follow-up: median 9.6 years, 415 deaths, 188 from breast cancer, 227 from any other cause | Invasive breast cancer             | FFQ, 122 items, self-administered, assessment at on average 1.5 years post-diagnosis | All-cause mortality (n=415)              | 91 vs 34 points | 0.74 (0.55-0.99)<br>P trend=0.043 | Age at screening visit, WHI components, ethnicity, income, education, stage, oestrogen receptor status, progesterone receptor status, time |
|                                              |                                                                                                          |                                                                                                                  |                                    |                                                                                      | Breast cancer-specific mortality (n=188) |                 | 0.91 (0.60-1.40)<br>P trend=0.627 |                                                                                                                                            |
|                                              |                                                                                                          |                                                                                                                  |                                    |                                                                                      | Non-breast-cancer-related death (n=227)  |                 | 0.58 (0.38-0.87)<br>P trend=0.011 |                                                                                                                                            |

| Author, year, study name, country, WCRF Code       | Study description                                                                                       | Time of diagnosis and follow-up | Disease characteristics treatment | Exposure assessment | Outcome (Events)            | Contrast          | RR (95% CI)      | Covariates                                                                                                                                           |
|----------------------------------------------------|---------------------------------------------------------------------------------------------------------|---------------------------------|-----------------------------------|---------------------|-----------------------------|-------------------|------------------|------------------------------------------------------------------------------------------------------------------------------------------------------|
|                                                    |                                                                                                         |                                 |                                   |                     |                             |                   |                  | since diagnosis, energy intake, physical activity, alcohol intake, use of postmenopausal hormone therapy                                             |
| Karavasiloglou <sup>19</sup> 2019, NHANES III, USA | Retrospective cohort of cancer survivors (n=110), mean age: 53.7 years, race: mostly non-Hispanic White | Follow-up: median 16 years      |                                   | 24-Hour Recall      | All-cause mortality (n=121) | 5-9 vs 0-4 points | 0.49 (0.25-0.97) | Age, BMI, Energy intake, Marital status, Menopausal hormone therapy use, other factors, Physical activity, Race, Smoking, Socioeconomic status, Time |
|                                                    |                                                                                                         |                                 |                                   |                     |                             | Per 1 point       | 0.97 (0.95-0.99) |                                                                                                                                                      |



| Author, year, study name, country, WCRF Code        | Study description                                                                                 | Time of diagnosis and follow-up                                                    | Disease characteristic s treatment                                                                                                                                   | Exposure assessment                                           | Outcome (Events)                                                      | Contrast        | RR (95% CI)                          | Covariates                                                                    |
|-----------------------------------------------------|---------------------------------------------------------------------------------------------------|------------------------------------------------------------------------------------|----------------------------------------------------------------------------------------------------------------------------------------------------------------------|---------------------------------------------------------------|-----------------------------------------------------------------------|-----------------|--------------------------------------|-------------------------------------------------------------------------------|
|                                                     |                                                                                                   |                                                                                    |                                                                                                                                                                      |                                                               |                                                                       |                 |                                      | between cancer diagnosis and exposure assessment                              |
| George <sup>17</sup><br>2011, HEAL, USA             | Prospective cohort of cancer survivors (n=670), post-menopausal 61%, race: White, Black and Other | Diagnosis: 1995-1999, follow-up: average 6 years, 62 deaths, 24 from breast cancer | Invasive, localized 71.3%, regional 28.6%, ER+ 77.6% ER-, 22.3%. Surgery 23.8%, radiation 35.8%, chemotherapy1 2.2%, radiation and chemotherapy2 8%, tamoxifen 51.5% | FFQ, 122 items, self-administered at 30 months post-diagnosis | All-cause mortality (n=62)<br>Breast cancer-specific mortality (n=24) | 87 vs 35 points | 0.40 (0.17-0.94)<br>0.12 (0.02-0.99) | Energy intake, Physical activity, ethnicity, tumour stage, tamoxifen use, BMI |
| <b>Alternative Healthy Eating Index (AHEI) 2010</b> |                                                                                                   |                                                                                    |                                                                                                                                                                      |                                                               |                                                                       |                 |                                      |                                                                               |
| Izano <sup>23</sup><br>2013, NHS, USA               | Population-based cohort study (n=4013),                                                           | Diagnosis: 1980-2003, follow-up:                                                   | Stage I-III                                                                                                                                                          | FFQ, 116 items, at least 12                                   | Breast cancer-specific mortality (n=453)                              | Q5 vs Q1 score  | 1.07 (0.77-1.49)<br>P trend=0.82     | Time since diagnosis, age at diagnosis,                                       |

| Author, year, study name, country, WCRF Code | Study description                                                                | Time of diagnosis and follow-up                                                                                      | Disease characteristic s treatment | Exposure assessment                                                        | Outcome (Events)                        | Contrast | RR (95% CI)                        | Covariates                                                                                                                                                                                              |
|----------------------------------------------|----------------------------------------------------------------------------------|----------------------------------------------------------------------------------------------------------------------|------------------------------------|----------------------------------------------------------------------------|-----------------------------------------|----------|------------------------------------|---------------------------------------------------------------------------------------------------------------------------------------------------------------------------------------------------------|
|                                              | mixed mean age: 60 years, race: mostly White                                     | median 112 months, until 2010                                                                                        |                                    | months post-diagnosis and updated during follow-up, data beginning in 1984 | Non-breast-cancer-related death (n=528) |          | 0.57 (0.42-0.77)<br>P trend<.0001  | energy intake, BMI, BMI change, age at first birth, parity, oral contraceptive, menopausal status, HRT, smoking, stage of disease, radiation therapy, chemotherapy, hormonal therapy, physical activity |
| Kim <sup>22</sup> 2011, NHS, USA             | Population-based cohort study (n=2377), post-menopausal 100%, race: mostly White | Diagnosis: 1978-1998, follow-up: until 2004, 572 deaths, 302 from breast cancer, 139 from CVD, 131 from other causes | Stage I-III                        | FFQ, 116 items, at least 12 months post-diagnosis                          | All-cause mortality (n=572)             | Q5 vs Q1 | 0.85 (0.63 - 1.17)<br>P trend=0.46 | Time from diagnosis to exposure assessment, age, energy, BMI, oral contraceptive, smoking, physical activity, stage, categories of treatment, age at first birth, parity, menopausal status,            |
|                                              |                                                                                  |                                                                                                                      |                                    |                                                                            | Breast cancer-related death (n=302)     |          | 1.53 (0.98-2.39)<br>P trend=0.08   |                                                                                                                                                                                                         |
|                                              |                                                                                  |                                                                                                                      |                                    |                                                                            | Non-breast-cancer-related death (n=270) |          | 0.52 (0.32-0.83)<br>P trend=0.09   |                                                                                                                                                                                                         |

| Author, year, study name, country, WCRF Code | Study description | Time of diagnosis and follow-up | Disease characteristic s treatment | Exposure assessment                     | Outcome (Events)                 | Contrast                                   | RR (95% CI)                       | Covariates                                                                                                                                                                                                                             |
|----------------------------------------------|-------------------|---------------------------------|------------------------------------|-----------------------------------------|----------------------------------|--------------------------------------------|-----------------------------------|----------------------------------------------------------------------------------------------------------------------------------------------------------------------------------------------------------------------------------------|
|                                              |                   |                                 |                                    |                                         |                                  |                                            |                                   | postmenopausal hormone use                                                                                                                                                                                                             |
|                                              |                   |                                 |                                    |                                         | All-cause mortality (n=572)      | Diet Quality Index Revised (DQIR) Q5 vs Q1 | 0.78 (0.58-1.07)<br>P trend=0.18  | Time from diagnosis to exposure assessment, age, energy, BMI, oral contraceptive, smoking, physical activity, stage, categories of treatment, age at first birth, parity, menopausal status, postmenopausal hormone use, multivitamins |
|                                              |                   |                                 |                                    | Breast cancer-related death (n=302)     | 0.81 (0.53-1.24)<br>P trend=0.98 |                                            |                                   |                                                                                                                                                                                                                                        |
|                                              |                   |                                 |                                    | Non-breast-cancer-related death (n=270) | 0.85 (0.54-1.34)<br>P trend=0.24 |                                            |                                   |                                                                                                                                                                                                                                        |
|                                              |                   |                                 |                                    |                                         | All-cause mortality (n=572)      | Recommended Food Score (RFS) Q5 vs Q1      | 1.03 (0.74-1.42)<br>P trend=0.85  |                                                                                                                                                                                                                                        |
|                                              |                   |                                 |                                    | Breast cancer-related death (n=302)     | 1.54 (0.95-2.47)<br>P trend=0.02 |                                            |                                   |                                                                                                                                                                                                                                        |
|                                              |                   |                                 |                                    | Non-breast-cancer-related death (n=270) | 0.86 (0.54-1.37)<br>P trend=0.31 |                                            |                                   |                                                                                                                                                                                                                                        |
|                                              |                   |                                 |                                    |                                         | Distant breast cancer recurrence |                                            | 1.45 (0.94-2.23)<br>P trend=0.001 | contraceptive, smoking, physical activity, stage,                                                                                                                                                                                      |

| Author, year, study name, country, WCRF Code               | Study description                                                                    | Time of diagnosis and follow-up                                | Disease characteristic s treatment | Exposure assessment                                                                                          | Outcome (Events)                                                                    | Contrast | RR (95% CI)                                                          | Covariates                                                                                                                                                                                                                                      |
|------------------------------------------------------------|--------------------------------------------------------------------------------------|----------------------------------------------------------------|------------------------------------|--------------------------------------------------------------------------------------------------------------|-------------------------------------------------------------------------------------|----------|----------------------------------------------------------------------|-------------------------------------------------------------------------------------------------------------------------------------------------------------------------------------------------------------------------------------------------|
|                                                            |                                                                                      |                                                                |                                    |                                                                                                              |                                                                                     |          |                                                                      | categories of treatment, age at first birth, parity, menopausal status, postmenopausal hormone use, multivitamins, alcohol intake                                                                                                               |
| <b>Dietary Approaches to Stop Hypertension (DASH) Diet</b> |                                                                                      |                                                                |                                    |                                                                                                              |                                                                                     |          |                                                                      |                                                                                                                                                                                                                                                 |
| Izano <sup>23</sup><br>2013, NHS, USA                      | Population-based cohort study (n=7717), mixed mean age: 60 years, race: mostly White | Diagnosis: 1980-2003, follow-up: median 112 months, until 2010 | Stage I-III                        | FFQ, 116 items, at least 12 months after diagnosis and updated during follow-up, diet data beginning in 1984 | Breast cancer-specific mortality (n=453)<br>Non-breast-cancer-related death (n=528) | Q5 vs Q1 | 0.85 (0.61-1.19)<br>P trend=0.93<br>0.72 (0.53-0.99)<br>P trend=0.03 | Time since diagnosis, age at diagnosis, energy intake, BMI, BMI change, age at first birth, parity, oral contraceptive, menopausal status, HRT, smoking, stage of disease, radiation therapy, chemotherapy, hormonal therapy, physical activity |

| Author, year, study name, country, WCRF Code | Study description                                                                                                | Time of diagnosis and follow-up             | Disease characteristic s treatment | Exposure assessment                                                                                               | Outcome (Events)                                                                           | Contrast           | RR (95% CI)                      | Covariates                                                                                                                                                                                                        |
|----------------------------------------------|------------------------------------------------------------------------------------------------------------------|---------------------------------------------|------------------------------------|-------------------------------------------------------------------------------------------------------------------|--------------------------------------------------------------------------------------------|--------------------|----------------------------------|-------------------------------------------------------------------------------------------------------------------------------------------------------------------------------------------------------------------|
| Wang <sup>21</sup><br>2020, SBCS, China      | Prospective cohort of cancer survivors (n=3450), age range: 25-70 years, pre- and post-menopausal, race: Chinese | Diagnosis: 2002-2006, follow-up: until 2017 | Stage I-IV                         | Semi-quantitative FFQ, 93 items, assessment of diet during the 12 months preceding a 5-year post-diagnosis survey | Overall survival (n=374)                                                                   | 49.3 vs 8.3 points | 0.66 (0.49-0.91)<br>P trend=0.01 | Age, BMI, chemotherapy, comorbidity, education, energy intake, er status, HER2 status, immunotherapy, income, marital status, menopausal status, other factors, physical activity, PR status, radiotherapy, stage |
|                                              |                                                                                                                  |                                             |                                    |                                                                                                                   | Breast cancer-specific mortality (n=252)<br>Recurrence (n=228)                             |                    | 0.63 (0.44-0.92)<br>P trend=0.01 |                                                                                                                                                                                                                   |
|                                              |                                                                                                                  |                                             |                                    |                                                                                                                   | Overall survival (n=374)<br>Breast cancer-specific mortality (n=252)<br>Recurrence (n=228) |                    | 0.60 (0.40-0.90)<br>P trend=0.01 |                                                                                                                                                                                                                   |
|                                              |                                                                                                                  |                                             |                                    |                                                                                                                   | Overall survival (n=374)                                                                   | Per 5 points       | 0.93 (0.87-0.98)                 |                                                                                                                                                                                                                   |
|                                              |                                                                                                                  |                                             |                                    |                                                                                                                   | Breast cancer-specific mortality (n=252)<br>Recurrence (n=228)                             |                    | 0.91 (0.85-0.98)                 |                                                                                                                                                                                                                   |
|                                              |                                                                                                                  |                                             |                                    |                                                                                                                   | TNM I-II Overall survival (n=295)                                                          |                    | 0.92 (0.85-0.99)                 |                                                                                                                                                                                                                   |
|                                              |                                                                                                                  |                                             |                                    |                                                                                                                   | TNM III-IV Overall survival (n=59)                                                         |                    | 0.91 (0.85-0.97)                 |                                                                                                                                                                                                                   |
|                                              |                                                                                                                  |                                             |                                    |                                                                                                                   | TNM I-II Breast cancer-specific mortality (n=194)                                          |                    | 1.04 (0.87-1.24)                 |                                                                                                                                                                                                                   |
|                                              |                                                                                                                  |                                             |                                    |                                                                                                                   | TNM III-IV Breast cancer-specific mortality (n=44)                                         |                    | 0.88 (0.81-0.96)                 |                                                                                                                                                                                                                   |
|                                              |                                                                                                                  |                                             |                                    |                                                                                                                   | TNM I-II Recurrence (n=185)                                                                |                    | 1.08 (0.86-1.34)                 |                                                                                                                                                                                                                   |
|                                              | 0.92 (0.82-1.02)                                                                                                 |                                             |                                    |                                                                                                                   |                                                                                            |                    |                                  |                                                                                                                                                                                                                   |

| Author, year, study name, country, WCRF Code           | Study description                                                                                    | Time of diagnosis and follow-up                                 | Disease characteristic s treatment                                                                                        | Exposure assessment               | Outcome (Events)                  | Contrast        | RR (95% CI)                       | Covariates                                                                                                                                                                                                |
|--------------------------------------------------------|------------------------------------------------------------------------------------------------------|-----------------------------------------------------------------|---------------------------------------------------------------------------------------------------------------------------|-----------------------------------|-----------------------------------|-----------------|-----------------------------------|-----------------------------------------------------------------------------------------------------------------------------------------------------------------------------------------------------------|
|                                                        |                                                                                                      |                                                                 |                                                                                                                           |                                   | TNM III-IV<br>Recurrence (n=106)  |                 | 0.92 (0.82-1.05)                  |                                                                                                                                                                                                           |
| Ergas <sup>16</sup><br>2021,<br>Pathways<br>Study, USA | Prospective cohort of cancer survivors (n=3660), age range: 24-94 years race: White, Black and Other | Diagnosis: 2005-2013, follow-up: 40888 person-years, until 2018 | Stage I 54.9%, II 34.3%, III 9.5%, IV 1.5%.<br>ER+ 83.9%, ER- 16.0%.<br>PR+ 64.1%, PR- 35.7%.<br>HER2+ 12.9%, HER2- 83.2% | FFQ, at 2.3 months post-diagnosis | Overall survival (n=621)          | 28 vs 10 points | 0.80 (0.61-1.05)<br>P trend=0.10  | Age, BMI, chemotherapy, education, er status, ethnicity, her2 status, hormonal therapy, menopausal status, physical activity, pr status, race, radiotherapy, smoking, stage, surgery, total energy intake |
|                                                        |                                                                                                      |                                                                 |                                                                                                                           |                                   | Cancer specific mortality (n=312) |                 | 0.93 (0.63-1.39)<br>P trend=0.68  | Age, education, ER status, ethnicity, HER2 status, Menopausal status,                                                                                                                                     |
|                                                        |                                                                                                      |                                                                 |                                                                                                                           |                                   | Recurrence (n=449)                |                 | 1.02 (0.73-1.41)<br>P trend=0.95  | Physical activity, PR status, Race, Smoking, stage, total energy intake                                                                                                                                   |
|                                                        |                                                                                                      |                                                                 |                                                                                                                           |                                   | Other causes of death (n=322)     |                 | 0.55 (0.38-0.79)<br>P trend=0.002 |                                                                                                                                                                                                           |

| Author, year, study name, country, WCRF Code | Study description | Time of diagnosis and follow-up | Disease characteristics treatment | Exposure assessment | Outcome (Events)                  | Contrast    | RR (95% CI)          | Covariates                                                                                                                                                                                                |
|----------------------------------------------|-------------------|---------------------------------|-----------------------------------|---------------------|-----------------------------------|-------------|----------------------|-----------------------------------------------------------------------------------------------------------------------------------------------------------------------------------------------------------|
|                                              |                   |                                 |                                   |                     | Overall survival (n=621)          | Per 1 point | 0.98<br>P trend=0.10 | Age, BMI, chemotherapy, education, er status, ethnicity, her2 status, hormonal therapy, menopausal status, physical activity, pr status, race, radiotherapy, smoking, stage, surgery, total energy intake |
|                                              |                   |                                 |                                   |                     | Cancer specific mortality (n=312) |             | 0.99<br>P trend=0.68 | Age, education, ER status,                                                                                                                                                                                |
|                                              |                   |                                 |                                   |                     | Recurrence (n=449)                |             | 1.0<br>P trend=0.95  | ethnicity, HER2 status, Menopausal status,                                                                                                                                                                |
|                                              |                   |                                 |                                   |                     | Other causes of death (n=322)     |             | 0.96<br>P trend=0.02 | Physical activity, PR status, Race, Smoking, stage, total energy intake                                                                                                                                   |

| Author, year, study name, country, WCRF Code | Study description                                                        | Time of diagnosis and follow-up                               | Disease characteristic s treatment                          | Exposure assessment                  | Outcome (Events)                     | Contrast             | RR (95% CI)                      | Covariates                                                                                                                                    |
|----------------------------------------------|--------------------------------------------------------------------------|---------------------------------------------------------------|-------------------------------------------------------------|--------------------------------------|--------------------------------------|----------------------|----------------------------------|-----------------------------------------------------------------------------------------------------------------------------------------------|
|                                              |                                                                          |                                                               |                                                             |                                      | ER positive Overall survival (n=502) | 28 vs 10 points      | 0.70 (0.52-0.95)<br>P trend=0.02 | Age, education, er status, ethnicity, her2 status, menopausal status, physical activity, pr status, race, smoking, stage, total energy intake |
|                                              |                                                                          |                                                               |                                                             | ER negative Overall survival (n=132) | 1.25 (0.64-2.43)<br>P trend=0.55     |                      |                                  |                                                                                                                                               |
|                                              |                                                                          |                                                               |                                                             | ER positive Overall survival (n=502) | Per 1 point                          | 0.98<br>P trend=0.02 |                                  |                                                                                                                                               |
|                                              |                                                                          |                                                               |                                                             | ER negative Overall survival (n=132) |                                      | 1.01<br>P trend=0.55 |                                  |                                                                                                                                               |
| <b>High-Fat Diet</b>                         |                                                                          |                                                               |                                                             |                                      |                                      |                      |                                  |                                                                                                                                               |
| Mohseny <sup>27</sup> 2019, Iran             | Retrospective cohort of cancer survivors (n=1276)                        | Diagnosis: 2004-2015, follow-up: maximum 10 years, until 2015 | Stage I-IV                                                  |                                      | Overall survival                     | Yes vs no            | 2.73 (1.06-7.03)                 | Age, education, ER status, other factors, PR status, stage, tumour size                                                                       |
| Baghestani <sup>28</sup> 2015, Iran          | Retrospective cohort of cancer survivors (n=366), age range: 17-84 years |                                                               | Stage I 24.9%, II 47.0%, III 28.1%, HER2-75.4%, HER2+ 24.6% |                                      | Breast cancer mortality              | Yes vs no            | 2.83<br>P trend=0.033            |                                                                                                                                               |
| <b>Diabetes Risk Reduction Diet</b>          |                                                                          |                                                               |                                                             |                                      |                                      |                      |                                  |                                                                                                                                               |
| Wang <sup>24</sup> 2021, NHS I and II, USA   | Population-based cohort study (n=8482),                                  | Diagnosis: 1980-2020, 1991-2015,                              | Stage I-III                                                 | Semi-quantitative FFQ, first         | Overall survival (n=2600)            | 33 vs 19 points      | 0.66 (0.58-0.76)<br>P trend=0.02 | Age, age at menarche, alcohol intake,                                                                                                         |



| Author, year, study name, country, WCRF Code | Study description                            | Time of diagnosis and follow-up              | Disease characteristic s treatment | Exposure assessment                                                      | Outcome (Events)                   | Contrast                         | RR (95% CI)                      | Covariates                                                                                                                                                                                                                                                                                                                         |
|----------------------------------------------|----------------------------------------------|----------------------------------------------|------------------------------------|--------------------------------------------------------------------------|------------------------------------|----------------------------------|----------------------------------|------------------------------------------------------------------------------------------------------------------------------------------------------------------------------------------------------------------------------------------------------------------------------------------------------------------------------------|
|                                              | pre- and post-menopausal, race: mostly White | follow-up: median 14 years, until 2016, 2017 |                                    | assessment at median 3 years post-diagnosis and every 4 years thereafter | Cancer specific mortality (n=1042) |                                  | 0.80 (0.65-0.97)<br>P trend=0.02 | aspirin use, BMI, chemotherapy, er status, family history of breast cancer, hormonal therapy, menopausal hormone therapy use, menopausal status, oral contraceptive, personal history of benign breast disease, parity, physical activity, pre-diagnosis BMI, radiotherapy, smoking, stage, total energy intake, year of diagnosis |
|                                              |                                              |                                              |                                    | Overall survival (n=2467)                                                | High/high vs low/low               | 0.87 (0.79-0.96)                 |                                  |                                                                                                                                                                                                                                                                                                                                    |
|                                              |                                              |                                              |                                    | Cancer specific mortality (n=986)                                        |                                    | 0.94 (0.81-1.10)                 |                                  |                                                                                                                                                                                                                                                                                                                                    |
|                                              |                                              |                                              |                                    | Premenopausal Cancer specific mortality (n=301)                          | Q5 vs Q1                           | 0.68 (0.47-0.99)<br>P trend=0.10 |                                  |                                                                                                                                                                                                                                                                                                                                    |
|                                              |                                              |                                              |                                    | Postmenopausal Cancer specific mortality (n=678)                         |                                    | 0.81 (0.63-1.04)<br>P trend=0.02 |                                  |                                                                                                                                                                                                                                                                                                                                    |
|                                              |                                              |                                              |                                    | Stage I Cancer specific mortality (n=294)                                |                                    | 0.85 (0.58-1.26)<br>P trend=0.02 |                                  |                                                                                                                                                                                                                                                                                                                                    |
|                                              |                                              |                                              |                                    | Stage II Cancer specific mortality (n=406)                               |                                    | 0.76 (0.55-1.05)<br>P trend=0.02 |                                  |                                                                                                                                                                                                                                                                                                                                    |
|                                              |                                              |                                              |                                    | Stage III Cancer specific mortality (n=342)                              |                                    | 0.77 (0.53-1.11)<br>P trend=0.02 |                                  |                                                                                                                                                                                                                                                                                                                                    |
| <b>Potential Renal Acid Load (PRAL)</b>      |                                              |                                              |                                    |                                                                          |                                    |                                  |                                  |                                                                                                                                                                                                                                                                                                                                    |

| Author, year, study name, country, WCRF Code | Study description                                               | Time of diagnosis and follow-up                                | Disease characteristic s treatment | Exposure assessment                         | Outcome (Events)                                        | Contrast | RR (95% CI)                      | Covariates                                                                                                                                                                                                                                                               |
|----------------------------------------------|-----------------------------------------------------------------|----------------------------------------------------------------|------------------------------------|---------------------------------------------|---------------------------------------------------------|----------|----------------------------------|--------------------------------------------------------------------------------------------------------------------------------------------------------------------------------------------------------------------------------------------------------------------------|
| Wu <sup>29</sup> , 2020, WHEL, USA           | Secondary analysis of clinical trials (n=3081)                  | Diagnosis: 1991-1996, follow-up: average 7.3 years, until 2006 | Stage I-III A                      | 24-h dietary recalls collected by telephone | Recurrence (n=517) ( <u>Competing risk regression</u> ) | Q4 vs Q1 | 0.86 (0.67-1.12)<br>P trend=0.41 | Age at diagnosis, race, education, intervention group, menopausal status at baseline, total calorie intake, alcohol intake, smoking status, pack-years, physical activity, BMI, tumor stage, tumor size, ER status, PR status, tamoxifen use, radiotherapy, chemotherapy |
| Wu <sup>26</sup> , 2020, WHEL, USA           | Secondary analysis of clinical trials (n=2950), post-menopausal | Diagnosis: 1991-1996, follow-up: average 7.3 years, until 2006 | Stage I-III A                      | 24-h dietary recalls collected by telephone | Total mortality (n=295)                                 | Q4 vs Q1 | 0.77 (0.52-1.15)<br>P trend=0.09 | Age, alcohol intake, BMI, chemotherapy, education, ER and PR status, intervention                                                                                                                                                                                        |

| Author, year, study name, country, WCRF Code | Study description                              | Time of diagnosis and follow-up                                | Disease characteristic s treatment | Exposure assessment                         | Outcome (Events)                                                                                     | Contrast | RR (95% CI)                      | Covariates                                                                                                                                                                                                  |
|----------------------------------------------|------------------------------------------------|----------------------------------------------------------------|------------------------------------|---------------------------------------------|------------------------------------------------------------------------------------------------------|----------|----------------------------------|-------------------------------------------------------------------------------------------------------------------------------------------------------------------------------------------------------------|
|                                              | >79%, race: mostly White                       |                                                                |                                    |                                             | Breast cancer-specific mortality (n=249) ( <u>Competing risk regression</u> )                        |          | 0.79 (0.52-1.20)<br>P trend=0.09 | group, menopausal status, number of comorbidities, pack years, physical activity, race/ethnicity, radiotherapy, tamoxifen use, total caloric intake, tumour size, tumour stage                              |
|                                              |                                                |                                                                |                                    |                                             | Recurrence (n=490) ( <u>Competing risk regression</u> . Results superseded by Wu <sup>29</sup> 2020) |          | 0.92 (0.70, 1.20)<br>P trend=0.5 |                                                                                                                                                                                                             |
| <b>Net Endogenous Acid Production (NEAP)</b> |                                                |                                                                |                                    |                                             |                                                                                                      |          |                                  |                                                                                                                                                                                                             |
| Wu <sup>29</sup> , 2020, WHEL, USA           | Secondary analysis of clinical trials (n=3081) | Diagnosis: 1991-1996, follow-up: average 7.3 years, until 2006 | Stage I-III A                      | 24-h dietary recalls collected by telephone | Recurrence (n=517) ( <u>Competing risk regression</u> )                                              | Q4 vs Q1 | 0.84 (0.65-1.10)<br>P trend=0.25 | Age at diagnosis, race, education, intervention group, menopausal status at baseline, total calorie intake, alcohol intake, smoking status, pack-years, physical activity, BMI, tumor stage, tumor size, ER |

| Author, year, study name, country, WCRF Code | Study description                                                                        | Time of diagnosis and follow-up                                | Disease characteristic s treatment | Exposure assessment                    | Outcome (Events)                                                                                         | Contrast | RR (95% CI)                      | Covariates                                                                                                                                                                                                                                                       |
|----------------------------------------------|------------------------------------------------------------------------------------------|----------------------------------------------------------------|------------------------------------|----------------------------------------|----------------------------------------------------------------------------------------------------------|----------|----------------------------------|------------------------------------------------------------------------------------------------------------------------------------------------------------------------------------------------------------------------------------------------------------------|
|                                              |                                                                                          |                                                                |                                    |                                        |                                                                                                          |          |                                  | status, PR status, tamoxifen use, radiotherapy, chemotherapy                                                                                                                                                                                                     |
| Wu <sup>26</sup> 2020, WHEL, USA             | Secondary analysis of clinical trials (n=1950), post-menopausal >79%, race: mostly White | Diagnosis: 1991-1996, follow-up: average 7.3 years, until 2006 | Stage I-III A                      | Interview, self-reported questionnaire | Total mortality (n=295)                                                                                  | Q4 vs Q1 | 0.65 (0.44-0.96)<br>P trend=0.03 | Age, alcohol intake, BMI, chemotherapy, education, ER and PR status, intervention group, menopausal status, number of comorbidities, pack years, physical activity, race/ethnicity, radiotherapy, tamoxifen use, total caloric intake, tumour size, tumour stage |
|                                              |                                                                                          |                                                                |                                    |                                        | Breast cancer-specific mortality (n=249)<br>( <u>Competing risk regression</u> )                         |          | 0.66 (0.43-0.99)<br>P trend=0.04 |                                                                                                                                                                                                                                                                  |
|                                              |                                                                                          |                                                                |                                    |                                        | Recurrence (n=490)<br>( <u>Competing risk regression</u> ). Results superseded by Wu <sup>29</sup> 2020) |          | 0.87 (0.67-1.14)<br>P trend=0.4  |                                                                                                                                                                                                                                                                  |
| <b>Alternative Mediterranean Diet (aMED)</b> |                                                                                          |                                                                |                                    |                                        |                                                                                                          |          |                                  |                                                                                                                                                                                                                                                                  |
| Kim <sup>22</sup> 2011, NHS, USA             | Population-based cohort study (n=2377),                                                  | Diagnosis: 1978-1998,                                          | Stage I-III                        | FFQ, at least 12 months                | All-cause mortality (n=572)                                                                              | Q5 vs Q1 | 0.87 (0.64-1.17)<br>P trend=0.34 | Time from diagnosis to exposure                                                                                                                                                                                                                                  |

| Author, year, study name, country, WCRF Code  | Study description                                                                                   | Time of diagnosis and follow-up | Disease characteristic s treatment                                                                               | Exposure assessment | Outcome (Events)                                                               | Contrast        | RR (95% CI)                                                          | Covariates                                                                                                                                                                                             |
|-----------------------------------------------|-----------------------------------------------------------------------------------------------------|---------------------------------|------------------------------------------------------------------------------------------------------------------|---------------------|--------------------------------------------------------------------------------|-----------------|----------------------------------------------------------------------|--------------------------------------------------------------------------------------------------------------------------------------------------------------------------------------------------------|
|                                               | mean age 23.77 years, post-menopausal 100%, race: mostly White                                      | follow-up: until 2004           |                                                                                                                  | after diagnosis     | Breast cancer-related death (n=302)<br>Non-breast-cancer-related death (n=270) |                 | 1.15 (0.74-1.77)<br>P trend=0.21<br>0.80 (0.50-1.26)<br>P trend=0.10 | assessment, age, energy, BMI, oral contraceptive, smoking, physical activity, stage, categories of treatment, age at first birth, parity, menopausal status, postmenopausal hormone use, multivitamins |
| Ergas <sup>16</sup> 2021, Pathways Study, USA | Prospective cohort of cancer survivors (n=3660), mean age: 59.7 years, race: White, Black and Other | Diagnosis: 2005-2013            | Stage I 54.9%, II 34.3%, III 9.5%, IV 1.5%, ER+ 83.9%, ER- 16.0%. PR+ 64.1%, PR- 35.7%. HER2+ 12.9%, HER2- 83.2% | FFQ, 139 items      | Overall survival (n=621)                                                       | 6-9 vs 0 points | 0.87 (0.66-1.14)<br>P trend=0.27                                     | Age, BMI, chemotherapy, education, ER status, ethnicity, HER2 status, hormonal therapy, menopausal status, physical activity, PR status, race, radiation delivery, smoking,                            |

| Author, year, study name, country, WCRF Code | Study description | Time of diagnosis and follow-up | Disease characteristic s treatment | Exposure assessment | Outcome (Events)                  | Contrast    | RR (95% CI)                      | Covariates                                                                                                                                                                                  |
|----------------------------------------------|-------------------|---------------------------------|------------------------------------|---------------------|-----------------------------------|-------------|----------------------------------|---------------------------------------------------------------------------------------------------------------------------------------------------------------------------------------------|
|                                              |                   |                                 |                                    |                     |                                   |             |                                  | stage, surgery, total energy intake                                                                                                                                                         |
|                                              |                   |                                 |                                    |                     | Cancer specific mortality (n=312) |             | 0.79 (0.57-1.16)<br>P trend=0.25 | Age, education, menopausal status, ER status, HER2 status,                                                                                                                                  |
|                                              |                   |                                 |                                    |                     | Recurrence (n=449)                |             | 1.08 (0.79-1.47)<br>P trend=0.46 | physical activity, PR status, race and ethnicity, smoking, total energy, tumor stage                                                                                                        |
|                                              |                   |                                 |                                    |                     | Other causes of death (n=322)     |             | 0.73 (0.50-1.05)<br>P trend=0.08 |                                                                                                                                                                                             |
|                                              |                   |                                 |                                    |                     | Overall survival (n=621.0)        | Per 1 point | 0.97<br>P trend=0.27             | Age, BMI, chemotherapy, education, ER status, ethnicity, HER2 status, hormonal therapy, menopausal status, physical activity, PR status, race, radiation delivery, smoking, stage, surgery, |

| Author, year, study name, country, WCRF Code | Study description | Time of diagnosis and follow-up | Disease characteristics treatment | Exposure assessment                    | Outcome (Events)                                        | Contrast             | RR (95% CI)                      | Covariates                                                                                                                                                                                  |
|----------------------------------------------|-------------------|---------------------------------|-----------------------------------|----------------------------------------|---------------------------------------------------------|----------------------|----------------------------------|---------------------------------------------------------------------------------------------------------------------------------------------------------------------------------------------|
|                                              |                   |                                 |                                   |                                        |                                                         |                      |                                  | total energy intake                                                                                                                                                                         |
|                                              |                   |                                 |                                   |                                        | Cancer specific mortality (n=312)<br>Recurrence (n=449) |                      | 0.96<br>P trend=0.25             | Age, education, menopausal status, ER status, HER2 status, physical activity, PR status, race and ethnicity, smoking, total energy, tumor stage                                             |
|                                              |                   |                                 |                                   | Other causes of death (n=322)          |                                                         | 1.02<br>P trend=0.46 |                                  |                                                                                                                                                                                             |
|                                              |                   |                                 |                                   |                                        |                                                         | 0.94<br>P trend=0.08 |                                  |                                                                                                                                                                                             |
|                                              |                   |                                 |                                   |                                        | ER positive Overall survival (n=502.0)                  | 6-9 vs 0 points      | 0.75 (0.55-1.01)<br>P trend=0.08 | Age, BMI, chemotherapy, education, ER status, ethnicity, HER2 status, hormonal therapy, menopausal status, physical activity, PR status, race, radiation delivery, smoking, stage, surgery, |
|                                              |                   |                                 |                                   | ER negative Overall survival (n=132.0) |                                                         |                      | 0.92 (0.49-1.71)<br>P trend=0.72 |                                                                                                                                                                                             |
|                                              |                   |                                 |                                   | ER positive Overall survival (n=502.0) | Per 1 point                                             | 0.95<br>P trend=0.08 |                                  |                                                                                                                                                                                             |
|                                              |                   |                                 |                                   | ER negative Overall survival (n=502.0) |                                                         |                      | 1.02<br>P trend=0.63             |                                                                                                                                                                                             |

| Author, year, study name, country, WCRF Code         | Study description                                                                                                      | Time of diagnosis and follow-up                                | Disease characteristic s treatment                                            | Exposure assessment | Outcome (Events)                  | Contrast          | RR (95% CI)      | Covariates                                                                                                                                                                                            |
|------------------------------------------------------|------------------------------------------------------------------------------------------------------------------------|----------------------------------------------------------------|-------------------------------------------------------------------------------|---------------------|-----------------------------------|-------------------|------------------|-------------------------------------------------------------------------------------------------------------------------------------------------------------------------------------------------------|
|                                                      |                                                                                                                        |                                                                |                                                                               |                     |                                   |                   |                  | total energy intake                                                                                                                                                                                   |
| <b>Trichopoulos Mediterranean Diet (ModiMed)</b>     |                                                                                                                        |                                                                |                                                                               |                     |                                   |                   |                  |                                                                                                                                                                                                       |
| Karavasiloglou <sup>19</sup> , 2019, NHANES III, USA | Retrospective cohort of cancer survivors (n=110), mean age: 53.7 years, race: mostly White                             | Recruitment: 1988-1995, follow-up: median 16 years, until 2011 |                                                                               | 24-Hour Diet Recall | All-cause mortality               | 5-9 vs 0-4 points | 0.78 (0.47-1.32) | Age, BMI, energy intake, marital status, menopausal hormone therapy use, Other factors, physical activity, race, smoking, socioeconomic status, time between cancer diagnosis and exposure assessment |
|                                                      |                                                                                                                        |                                                                |                                                                               |                     |                                   | Per 1 point       | 0.97 (0.82-1.16) |                                                                                                                                                                                                       |
| <b>Plant-Based Dietary Index (PDI)</b>               |                                                                                                                        |                                                                |                                                                               |                     |                                   |                   |                  |                                                                                                                                                                                                       |
| Anyene <sup>25</sup> 2021, Pathways Study, USA       | Prospective cohort of cancer survivors (n=3646), mean age: 60 years, post-menopausal 71%, race: White, Black and Other | Diagnosis: 2005-2013, follow-up: median 9.2 years, until 2018  | Stage I 55%, II 34%, III 9.5%, IV 1.5%, ER+ 84%, ER-16%, HER2+ 13%, HER2- 83% | FFQ, 139 items      | All-cause mortality (n=653)       | Per 10 units      | 0.96 (0.82-1.11) | Age at baseline, education, er status, menopausal status, physical activity, race, smoking, stage, total energy intake                                                                                |
|                                                      |                                                                                                                        |                                                                |                                                                               |                     | Cancer specific mortality (n=323) |                   | 1.17 (0.98-1.39) |                                                                                                                                                                                                       |
|                                                      |                                                                                                                        |                                                                |                                                                               |                     | Recurrence (n=461)                |                   | 1.17 (0.98-1.39) |                                                                                                                                                                                                       |
|                                                      |                                                                                                                        |                                                                |                                                                               |                     | Other causes of death (n=330)     |                   | 0.90 (0.73-1.11) |                                                                                                                                                                                                       |
| <b>Healthy Plant-Based Dietary Index (hPDI)</b>      |                                                                                                                        |                                                                |                                                                               |                     |                                   |                   |                  |                                                                                                                                                                                                       |



| Author, year, study name, country, WCRF Code            | Study description                                                                                                      | Time of diagnosis and follow-up                               | Disease characteristic s treatment                                            | Exposure assessment                          | Outcome (Events)                        | Contrast                   | RR (95% CI)                      | Covariates                                                                                                             |
|---------------------------------------------------------|------------------------------------------------------------------------------------------------------------------------|---------------------------------------------------------------|-------------------------------------------------------------------------------|----------------------------------------------|-----------------------------------------|----------------------------|----------------------------------|------------------------------------------------------------------------------------------------------------------------|
| Anyene <sup>25</sup><br>2021,<br>Pathways<br>Study, USA | Prospective cohort of cancer survivors (n=3646), mean age: 60 years, post-menopausal 71%, race: White, Black and Other | Diagnosis: 2005-2013, follow-up: median 9.2 years, until 2018 | Stage I 55%, II 34%, III 9.5%, IV 1.5%, ER+ 84%, ER-16%, HER2+ 13%, HER2- 83% | FFQ, 139 items                               | All-cause mortality (n=653)             | Per 10 units               | 0.93 (0.83-1.05)                 | Age at baseline, education, er status, menopausal status, physical activity, race, smoking, stage, total energy intake |
|                                                         |                                                                                                                        |                                                               |                                                                               |                                              | Cancer specific mortality (n=323)       |                            | 1.07 (0.91-1.25)                 |                                                                                                                        |
|                                                         |                                                                                                                        |                                                               |                                                                               |                                              | Recurrence (n=461)                      |                            | 1.11 (0.97-1.26)                 |                                                                                                                        |
|                                                         |                                                                                                                        |                                                               |                                                                               |                                              | Other causes of death (n=330)           |                            | 0.83 (0.71-0.96)                 |                                                                                                                        |
| <b>Unhealthy Plant-Based Dietary Index (uPDI)</b>       |                                                                                                                        |                                                               |                                                                               |                                              |                                         |                            |                                  |                                                                                                                        |
| Anyene <sup>25</sup><br>2021,<br>Pathways<br>Study, USA | Prospective cohort of cancer survivors (n=3646), mean age: 60 years, post-menopausal 71%, race: White, Black and Other | Diagnosis: 2005-2013, follow-up: median 9.2 years, until 2018 | Stage I 55%, II 34%, III 9.5%, IV 1.5%, ER+ 84%, ER-16%, HER2+ 13%, HER2- 83% | FFQ, 139 items                               | All-cause mortality (n=653)             | Per 10 units               | 1.07 (0.96-1.20)                 | Age at baseline, education, er status, menopausal status, physical activity, race, smoking, stage, total energy intake |
|                                                         |                                                                                                                        |                                                               |                                                                               |                                              | Cancer specific mortality (n=323)       |                            | 0.94 (0.80-1.10)                 |                                                                                                                        |
|                                                         |                                                                                                                        |                                                               |                                                                               |                                              | Recurrence (n=461)                      |                            | 0.90 (0.79-1.03)                 |                                                                                                                        |
|                                                         |                                                                                                                        |                                                               |                                                                               |                                              | Other causes of death (n=330)           |                            | 1.2 (1.02-1.41)                  |                                                                                                                        |
| <b>WCRF/AICR Recommendations</b>                        |                                                                                                                        |                                                               |                                                                               |                                              |                                         |                            |                                  |                                                                                                                        |
| Inoue-Choi <sup>10</sup><br>2013, IWHS,<br>USA          | Population-based cohort study (n=938), age range: 72-99 years, post-menopausal                                         | Diagnosis: 1986-2002, follow-up: until 2009                   | Invasive breast cancer                                                        | FFQ, 127 items, assessment at an average 8.6 | All-cause mortality (n=203)             | Adherence summary Q4 vs Q1 | 0.61 (0.39-0.96)<br>P trend=0.01 | Age, total number of comorbid conditions, perceived general health,                                                    |
|                                                         |                                                                                                                        |                                                               |                                                                               |                                              | Breast cancer-specific mortality (n=75) |                            | 0.88 (0.41-1.91)<br>P trend=0.65 |                                                                                                                        |

| Author, year, study name, country, WCRF Code               | Study description                                                                  | Time of diagnosis and follow-up                                                                   | Disease characteristic s treatment                                                                                                                                | Exposure assessment                                           | Outcome (Events)                                 | Contrast           | RR (95% CI)                      | Covariates                                                                                                                                                                                   |
|------------------------------------------------------------|------------------------------------------------------------------------------------|---------------------------------------------------------------------------------------------------|-------------------------------------------------------------------------------------------------------------------------------------------------------------------|---------------------------------------------------------------|--------------------------------------------------|--------------------|----------------------------------|----------------------------------------------------------------------------------------------------------------------------------------------------------------------------------------------|
|                                                            | 100%, race: mostly White                                                           |                                                                                                   |                                                                                                                                                                   | years post-diagnosis                                          | Cardiovascular disease specific mortality (n=66) |                    | 0.67 (0.33-1.37)<br>P trend=0.10 | current smoking, cancer stage, cancer type, cancer treatment, subsequent cancer diagnosis before 2004, current cancer treatment, and person-years since cancer diagnosis                     |
| <b>American Cancer Society (ACS) Guidelines Diet Score</b> |                                                                                    |                                                                                                   |                                                                                                                                                                   |                                                               |                                                  |                    |                                  |                                                                                                                                                                                              |
| McCullough <sup>1</sup><br><sup>5</sup> 2016, CPS-II, USA  | Population-based cohort study (n=2152), age range: 40-93 years, race: mostly White | Diagnosis: 1992-2011, follow-up: mean 9.9 years, 640 deaths, 192 from breast cancer, 129 from CVD | Local 77.3%, regional 22.7%, grade well differentiated 22.6%, moderately differentiated 39.0%, poorly or unknown 23.7%, ER+:79.5%; ER-:9.7%; PR+:57.2%; PR-:21.1% | FFQ, self-administered at a minimum of 1 year after diagnosis | Total mortality (n=640)                          | 6-9 vs 0-2 points  | 0.93 (0.73-1.18)<br>P trend=0.26 | Age at diagnosis, diagnosis year, tumour stage, tumour grade, oestrogen and progesterone receptor status, initial delivered treatment, BMI, smoking status, physical activity, energy intake |
|                                                            |                                                                                    |                                                                                                   |                                                                                                                                                                   |                                                               |                                                  | Per 2 points       | 0.96 (0.88-1.03)                 |                                                                                                                                                                                              |
|                                                            |                                                                                    |                                                                                                   |                                                                                                                                                                   |                                                               | Breast cancer-specific mortality (n=192)         | 6-9 vs. 0-2 points | 1.44 (0.90-2.30)<br>P trend=0.22 |                                                                                                                                                                                              |
|                                                            |                                                                                    |                                                                                                   |                                                                                                                                                                   |                                                               |                                                  | Per 2 points       | 1.09 (0.95-1.26)                 |                                                                                                                                                                                              |
|                                                            |                                                                                    |                                                                                                   |                                                                                                                                                                   |                                                               | Cardiovascular disease (n=129)                   | 6-9 vs 0-2 points  | 0.81 (0.47-1.39)<br>P trend=0.55 |                                                                                                                                                                                              |
|                                                            |                                                                                    |                                                                                                   |                                                                                                                                                                   |                                                               |                                                  | Per 2 points       | 0.95 (0.79-1.14)                 |                                                                                                                                                                                              |

| Author, year, study name, country, WCRF Code | Study description | Time of diagnosis and follow-up | Disease characteristic s treatment | Exposure assessment                      | Outcome (Events)                                           | Contrast                                          | RR (95% CI)                      | Covariates                                                                                                                                                                                                                                                   |
|----------------------------------------------|-------------------|---------------------------------|------------------------------------|------------------------------------------|------------------------------------------------------------|---------------------------------------------------|----------------------------------|--------------------------------------------------------------------------------------------------------------------------------------------------------------------------------------------------------------------------------------------------------------|
|                                              |                   |                                 |                                    |                                          | Other causes (n=319)                                       | 6-9 vs 0-2 points                                 | 0.78 (0.56-1.07)<br>P trend=0.03 |                                                                                                                                                                                                                                                              |
|                                              |                   |                                 |                                    |                                          |                                                            | Per 2 points                                      | 0.88 (0.79-0.99)                 |                                                                                                                                                                                                                                                              |
|                                              |                   |                                 |                                    |                                          | Total mortality (n=640)                                    | Component score: % of total whole grain, Q4 vs Q1 | 1.09 (0.86-1.38)<br>P trend=0.75 | Age at diagnosis, diagnosis year, tumour stage, tumour grade, oestrogen and progesterone receptor status, initial delivered treatment, BMI, smoking status, physical activity, energy intake, fruit and vegetable consumption, red and processed meat intake |
|                                              |                   |                                 |                                    | Breast cancer-specific mortality (n=192) | 1.24 (0.81-1.88)<br>P trend=0.39                           |                                                   |                                  |                                                                                                                                                                                                                                                              |
|                                              |                   |                                 |                                    | Cardiovascular disease mortality (n=129) | 1.43 (0.82-2.50)<br>P trend=0.44                           |                                                   |                                  |                                                                                                                                                                                                                                                              |
|                                              |                   |                                 |                                    | Other causes (n=319)                     | 0.91 (0.64-1.29)<br>P trend=0.57                           |                                                   |                                  |                                                                                                                                                                                                                                                              |
|                                              |                   |                                 |                                    | Total mortality (n=640)                  | Component score: Fruit and vegetable intake, 3 vs 0 points | 1.03 (0.80-1.33)<br>P trend=0.55                  |                                  |                                                                                                                                                                                                                                                              |
|                                              |                   |                                 |                                    | Breast cancer-specific mortality (n=192) |                                                            | 1.31 (0.83-2.06)<br>P trend=0.19                  |                                  |                                                                                                                                                                                                                                                              |
|                                              |                   |                                 |                                    | Cardiovascular disease mortality (n=129) |                                                            | 0.80 (0.45-1.44)<br>P trend=0.85                  |                                  |                                                                                                                                                                                                                                                              |
|                                              |                   |                                 |                                    | Other causes (n=319)                     |                                                            | 0.93 (0.65-1.34)<br>P trend=0.73                  |                                  |                                                                                                                                                                                                                                                              |
|                                              |                   |                                 |                                    | Total mortality (n=640)                  | Component score: Red and processed                         | 0.64 (0.49, 0.84)<br>P trend=0.01                 |                                  |                                                                                                                                                                                                                                                              |

| Author, year, study name, country, WCRF Code  | Study description                                                                                  | Time of diagnosis and follow-up | Disease characteristic s treatment                                                                               | Exposure assessment                      | Outcome (Events)                         | Contrast              | RR (95% CI)                       | Covariates                                                                                                                                                                                                      |
|-----------------------------------------------|----------------------------------------------------------------------------------------------------|---------------------------------|------------------------------------------------------------------------------------------------------------------|------------------------------------------|------------------------------------------|-----------------------|-----------------------------------|-----------------------------------------------------------------------------------------------------------------------------------------------------------------------------------------------------------------|
|                                               |                                                                                                    |                                 |                                                                                                                  |                                          | Breast cancer-specific mortality (n=192) | meat intake, Q1 vs Q4 | 0.88 (0.54, 1.43)<br>P trend=0.60 |                                                                                                                                                                                                                 |
|                                               |                                                                                                    |                                 |                                                                                                                  | Cardiovascular disease mortality (n=129) | 0.52 (0.27, 0.98)<br>P trend=0.11        |                       |                                   |                                                                                                                                                                                                                 |
|                                               |                                                                                                    |                                 |                                                                                                                  | Other causes (n=319)                     | 0.57 (0.39, 0.82)<br>P trend=0.02        |                       |                                   |                                                                                                                                                                                                                 |
| Ergas <sup>16</sup> 2021, Pathways Study, USA | Prospective cohort of cancer survivors (n=3660), mean age:59.7 years, race: White, Black and Other | Diagnosis: 2005-2013            | Stage I 54.9%, II 34.3%, III 9.5%, IV 1.5%, ER+ 83.9%, ER- 16.0%. PR+ 64.1%, PR- 35.7%, HER2+ 12.9%, HER2- 83.2% | FFQ                                      | Overall survival (n=621)                 | 7-9 vs 0 points       | 0.77 (0.59-1.01)<br>P trend=0.07  | Age, BMI, chemotherapy, education, ER status, ethnicity, HER2 status, hormonal therapy, menopausal status, physical activity, PR status, race, radiation delivery, smoking, stage, surgery, total energy intake |
|                                               |                                                                                                    |                                 |                                                                                                                  |                                          | Cancer specific mortality (n=312)        |                       | 0.75 (0.52-1.09)<br>P trend=0.29  | Age, education, ER status, ethnicity,                                                                                                                                                                           |

| Author, year, study name, country, WCRF Code | Study description | Time of diagnosis and follow-up | Disease characteristics treatment | Exposure assessment | Outcome (Events)                  | Contrast    | RR (95% CI)                      | Covariates                                                                                                                                                                                                      |
|----------------------------------------------|-------------------|---------------------------------|-----------------------------------|---------------------|-----------------------------------|-------------|----------------------------------|-----------------------------------------------------------------------------------------------------------------------------------------------------------------------------------------------------------------|
|                                              |                   |                                 |                                   |                     | Recurrence (n=449)                |             | 1.19 (0.89-1.57)<br>P trend=0.55 | HER2 status, menopausal status, physical activity, PR status, race, smoking, stage, total energy intake                                                                                                         |
|                                              |                   |                                 |                                   |                     | Other causes of death (n=322)     |             | 0.69 (0.48-0.98)<br>P trend=0.03 |                                                                                                                                                                                                                 |
|                                              |                   |                                 |                                   |                     | Overall survival (n=621)          | Per 1 point | 0.96<br>P trend=0.07             | Age, BMI, chemotherapy, education, ER status, ethnicity, HER2 status, hormonal therapy, menopausal status, physical activity, PR status, race, radiation delivery, smoking, stage, surgery, total energy intake |
|                                              |                   |                                 |                                   |                     | Cancer specific mortality (n=312) |             | 0.97<br>P trend=0.29             | Age, education, ER status, ethnicity, HER2 status,                                                                                                                                                              |
|                                              |                   |                                 |                                   |                     | Recurrence (n=449)                |             | 1.01<br>P trend=0.55             |                                                                                                                                                                                                                 |

| Author, year, study name, country, WCRF Code | Study description                                                                      | Time of diagnosis and follow-up | Disease characteristic s treatment | Exposure assessment   | Outcome (Events)                         | Contrast            | RR (95% CI)                      | Covariates                                                                                                                                                                                    |
|----------------------------------------------|----------------------------------------------------------------------------------------|---------------------------------|------------------------------------|-----------------------|------------------------------------------|---------------------|----------------------------------|-----------------------------------------------------------------------------------------------------------------------------------------------------------------------------------------------|
|                                              |                                                                                        |                                 |                                    |                       | Other causes of death (n=322)            |                     | 1.00<br>P trend=0.03             | menopausal status, physical activity, PR status, race, smoking, stage, total energy intake                                                                                                    |
|                                              |                                                                                        |                                 |                                    |                       | ER positive Overall survival (n=502)     | 7-9 vs 0 points     | 0.68 (0.51-0.91)<br>P trend=0.01 |                                                                                                                                                                                               |
|                                              |                                                                                        |                                 |                                    |                       | ER negative Overall survival (n=132)     |                     | 1.05 (0.59-1.89)<br>P trend=0.63 |                                                                                                                                                                                               |
|                                              |                                                                                        |                                 |                                    |                       | ER positive Overall survival (n=502)     | Per 1 point         | 0.94<br>P trend=0.01             |                                                                                                                                                                                               |
|                                              |                                                                                        |                                 |                                    |                       | ER negative Overall survival (n=502)     |                     | 1.02<br>P trend=0.63             |                                                                                                                                                                                               |
| <b>Chinese Food Pagoda (CHFP) 2007 Score</b> |                                                                                        |                                 |                                    |                       |                                          |                     |                                  |                                                                                                                                                                                               |
| Wang <sup>21</sup><br>2020, SBCS, China      | Prospective cohort of cancer survivors (n=3450), age range: 25-70 years, race: Chinese | Diagnosis: 2002-2006            |                                    | Semi-quantitative FFQ | Overall survival (n=374)                 | 39.2 vs 14.5 points | 0.66 (0.48-0.89)<br>P trend=0.01 | Age, BMI, chemotherapy, comorbidity, education, energy intake, ER status, HER2 status, immunotherapy, income, marital status, menopausal status, other factors, physical activity, PR status, |
|                                              |                                                                                        |                                 |                                    |                       | Breast cancer-specific mortality (n=252) |                     | 0.58 (0.40-0.84)<br>P trend=0.01 |                                                                                                                                                                                               |
|                                              |                                                                                        |                                 |                                    |                       | Recurrence (n=228)                       |                     | 0.64 (0.44-0.93)<br>P trend=0.01 |                                                                                                                                                                                               |
|                                              |                                                                                        |                                 |                                    |                       | Overall survival (n=252)                 | Per 5 points        | 0.87 (0.79-0.96)                 |                                                                                                                                                                                               |
|                                              |                                                                                        |                                 |                                    |                       | Breast cancer-specific mortality (n=252) |                     | 0.86 (0.76-0.97)                 |                                                                                                                                                                                               |
|                                              |                                                                                        |                                 |                                    |                       | Recurrence (n=228)                       |                     | 0.84 (0.74-0.95)                 |                                                                                                                                                                                               |

| Author, year, study name, country, WCRF Code | Study description                                                                      | Time of diagnosis and follow-up | Disease characteristic s treatment | Exposure assessment   | Outcome (Events)                                   | Contrast            | RR (95% CI)                   | Covariates                                                                                                                                                               |
|----------------------------------------------|----------------------------------------------------------------------------------------|---------------------------------|------------------------------------|-----------------------|----------------------------------------------------|---------------------|-------------------------------|--------------------------------------------------------------------------------------------------------------------------------------------------------------------------|
|                                              |                                                                                        |                                 |                                    |                       | TNM I-II Overall survival (n=295)                  |                     | 0.87 (0.78-0.98)              | radiotherapy, stage                                                                                                                                                      |
|                                              |                                                                                        |                                 |                                    |                       | TNM III-IV Overall survival (n=59)                 |                     | 0.89 (0.66-1.21)              |                                                                                                                                                                          |
|                                              |                                                                                        |                                 |                                    |                       | TNM I-II Breast cancer-specific mortality (n=194)  |                     | 0.84 (0.73-0.96)              |                                                                                                                                                                          |
|                                              |                                                                                        |                                 |                                    |                       | TNM III-IV Breast cancer-specific mortality (n=44) |                     | 0.93 (0.63-0.96)              |                                                                                                                                                                          |
|                                              |                                                                                        |                                 |                                    |                       | TNM I-II Recurrence (n=185)                        |                     | 0.81 (0.70-0.93)              |                                                                                                                                                                          |
|                                              |                                                                                        |                                 |                                    |                       | TNM III-IV Recurrence (n=29)                       |                     | 1.23 (0.73-2.09)              |                                                                                                                                                                          |
| <b>Chinese Food Pagoda (CHFP) 2016 Score</b> |                                                                                        |                                 |                                    |                       |                                                    |                     |                               |                                                                                                                                                                          |
| Wang <sup>21</sup><br>2020, SBCS, China      | Prospective cohort of cancer survivors (n=3450), age range: 25-70 years, race: Chinese | Diagnosis: 2002-2006            |                                    | Semi-quantitative FFQ | Overall survival (n=374.0)                         | 35.7 vs 13.2 points | 0.75 (0.55-1.01) P trend=0.01 | Age, BMI, chemotherapy, comorbidity, education, energy intake, ER status, HER2 status, immunotherapy, income, marital status, menopausal status, other factors, physical |
|                                              |                                                                                        |                                 |                                    |                       | Breast cancer-specific mortality (n=252.0)         |                     | 0.70 (0.48-1.01) P trend=0.01 |                                                                                                                                                                          |
|                                              |                                                                                        |                                 |                                    |                       | Recurrence (n=228.0)                               | 35.7 vs 14 points   | 0.67 (0.45-0.99) P trend=0.01 |                                                                                                                                                                          |
|                                              |                                                                                        |                                 |                                    |                       | Overall survival (n=374)                           | Per 5 points        | 0.87 (0.79-0.96)              |                                                                                                                                                                          |
|                                              |                                                                                        |                                 |                                    |                       | Breast cancer-specific mortality (n=252)           |                     | 0.85 (0.76-0.96)              |                                                                                                                                                                          |

| Author, year, study name, country, WCRF Code | Study description                                                                                               | Time of diagnosis and follow-up                   | Disease characteristic s treatment                                                                                                                | Exposure assessment                                                                                                                               | Outcome (Events)                         | Contrast                                                       | RR (95% CI)                      | Covariates                                                                                                                                       |
|----------------------------------------------|-----------------------------------------------------------------------------------------------------------------|---------------------------------------------------|---------------------------------------------------------------------------------------------------------------------------------------------------|---------------------------------------------------------------------------------------------------------------------------------------------------|------------------------------------------|----------------------------------------------------------------|----------------------------------|--------------------------------------------------------------------------------------------------------------------------------------------------|
|                                              |                                                                                                                 |                                                   |                                                                                                                                                   |                                                                                                                                                   | Recurrence (n=228.0)                     |                                                                | 0.84 (0.74-0.95)                 | activity, PR status, radiotherapy, stage                                                                                                         |
| <b>Fasting</b>                               |                                                                                                                 |                                                   |                                                                                                                                                   |                                                                                                                                                   |                                          |                                                                |                                  |                                                                                                                                                  |
| Marinac <sup>30</sup><br>2016,<br>WHEL, USA  | Secondary analysis of clinical trials (n=2413), age range: 27-70 years, post-menopausal 82%, race: mostly White | Recruitment: 1995-2007, follow-up: mean 7.3 years | Stage I 37.8%, II 46.2%, III 16%, well differentiated 16.1%, moderately 40.5%, poorly 36.8%, unspecified 6.6%, no current or planned chemotherapy | 24-hour recall. At baseline, year 1, and year 4, collected by telephone on random days during a 3-week period, stratified for weekend vs weekdays | All-cause mortality (n=420)              | Eating episodes per day<br>Per additional daily eating episode | 0.99 (0.89-1.10)<br>P trend=0.86 | Age, race, education, comorbidity, tumour stage, grade, radiotherapy, tamoxifen use, calories, menopausal status, study site, intervention group |
|                                              |                                                                                                                 |                                                   |                                                                                                                                                   |                                                                                                                                                   | Breast cancer-specific mortality (n=329) |                                                                | 1.00 (0.89-1.13)<br>P trend=0.96 |                                                                                                                                                  |
|                                              |                                                                                                                 |                                                   |                                                                                                                                                   |                                                                                                                                                   | Breast cancer recurrence (n=390)         |                                                                | 0.97 (0.87-1.08)<br>P trend=0.60 |                                                                                                                                                  |
|                                              |                                                                                                                 |                                                   |                                                                                                                                                   |                                                                                                                                                   | All-cause mortality (n=420)              | Eating after 8pm, yes vs no                                    | 0.97 (0.76-1.24)<br>P trend=0.80 |                                                                                                                                                  |
|                                              |                                                                                                                 |                                                   |                                                                                                                                                   |                                                                                                                                                   | Breast cancer-specific mortality (n=329) |                                                                | 0.98 (0.74-1.28)<br>P trend=0.86 |                                                                                                                                                  |
|                                              |                                                                                                                 |                                                   |                                                                                                                                                   |                                                                                                                                                   | Breast cancer recurrence (n=390)         |                                                                | 0.97 (0.76-1.24)<br>P trend=0.81 |                                                                                                                                                  |
|                                              |                                                                                                                 |                                                   |                                                                                                                                                   |                                                                                                                                                   | All-cause mortality (n=420)              | Nightly fasting, <13 vs ≥13 hours/night                        | 1.22 (0.95-1.56)<br>P trend=0.12 |                                                                                                                                                  |
|                                              |                                                                                                                 |                                                   |                                                                                                                                                   |                                                                                                                                                   | Breast cancer-specific mortality (n=329) |                                                                | 1.21 (0.91-1.60)<br>P trend=0.19 |                                                                                                                                                  |



| Author, year, study name, country, WCRF Code | Study description                                                                                                | Time of diagnosis and follow-up                                                                                                           | Disease characteristic s treatment                                                                                                                              | Exposure assessment                                                                                                            | Outcome (Events)                         | Contrast | RR (95% CI)                      | Covariates                                                                                                                                                 |
|----------------------------------------------|------------------------------------------------------------------------------------------------------------------|-------------------------------------------------------------------------------------------------------------------------------------------|-----------------------------------------------------------------------------------------------------------------------------------------------------------------|--------------------------------------------------------------------------------------------------------------------------------|------------------------------------------|----------|----------------------------------|------------------------------------------------------------------------------------------------------------------------------------------------------------|
|                                              |                                                                                                                  |                                                                                                                                           |                                                                                                                                                                 |                                                                                                                                | Breast cancer recurrence (n=390)         |          | 1.36 (1.05-1.76)<br>P trend=0.02 |                                                                                                                                                            |
| <b>Prudent Dietary Pattern</b>               |                                                                                                                  |                                                                                                                                           |                                                                                                                                                                 |                                                                                                                                |                                          |          |                                  |                                                                                                                                                            |
| Kwan <sup>8</sup><br>2009,<br>LACE, USA      | Prospective cohort of cancer survivors (n=1901), age range: 18-79 years, post-menopausal 65%, race: mostly White | Diagnosis: 1997-2000, follow-up: mean 4.2 years, 226 deaths, 128 from breast cancer, 29 from cardiovascular disease, 69 from other causes | Stage I 48%, IIA 32.7%, IIB 16.3%, IIIA 3%, ER+/PR+ 68.1%, ER+/PR- 14.6%, ER-/PR+ 1.9%, ER-/PR- 15.5%, treatment completed except for adjuvant hormonal therapy | Semi-quantitative FFQ, 122 items, self-administered, diet over the last 12 months assessed at 11- and 39-months post-diagnosis | All-cause mortality (n=213)              | Q4 vs Q1 | 0.57 (0.36-0.90)<br>P trend=0.02 | Age at diagnosis, energy intake, race, BMI, physical activity, smoking, menopausal status, weight change, tumour stage, hormone receptor status, treatment |
|                                              |                                                                                                                  |                                                                                                                                           |                                                                                                                                                                 |                                                                                                                                | Breast cancer-specific mortality (n=121) |          | 0.79 (0.43-1.43)<br>P trend=0.57 |                                                                                                                                                            |
|                                              |                                                                                                                  |                                                                                                                                           |                                                                                                                                                                 |                                                                                                                                | Additional breast cancer events (n=256)  |          | 0.95 (0.63-1.43)<br>P trend=0.94 |                                                                                                                                                            |
|                                              |                                                                                                                  |                                                                                                                                           |                                                                                                                                                                 |                                                                                                                                | Non-breast-cancer-related death (n=92)   |          | 0.35 (0.17-0.73)<br>P trend=0.03 |                                                                                                                                                            |
| Kroenke <sup>7</sup><br>2005(a),<br>NHS      | Population-based cohort study (n=2619), age range: 30-55 years, race: mostly White                               | Diagnosis: 1982-1998, follow-up: median 9 years, until 2002 414 deaths, 242 from breast cancer, 172 from other causes                     | Invasive breast cancer                                                                                                                                          | FFQ, diet measured closest to and at least 12 months after breast cancer diagnosis                                             | All-cause mortality (n=414)              | Q5 vs Q1 | 0.78 (0.54-1.12)<br>P trend=0.25 | Age, BMI, energy intake, smoking, physical activity, age of menarche, oral contraceptive, menopausal status, hormonal therapy,                             |
|                                              |                                                                                                                  |                                                                                                                                           |                                                                                                                                                                 |                                                                                                                                | Breast cancer-specific mortality (n=242) |          | 1.07 (0.66-1.73)<br>P trend=0.57 |                                                                                                                                                            |
|                                              |                                                                                                                  |                                                                                                                                           |                                                                                                                                                                 |                                                                                                                                | Non-breast-cancer-related death(n=172)   |          | 0.54 (0.31-0.95)<br>P trend=0.03 |                                                                                                                                                            |

| Author, year, study name, country, WCRF Code | Study description                                                                                        | Time of diagnosis and follow-up                                              | Disease characteristic s treatment                                     | Exposure assessment | Outcome (Events)                              | Contrast | RR (95% CI)                      | Covariates                                                                                                                                                                                                        |
|----------------------------------------------|----------------------------------------------------------------------------------------------------------|------------------------------------------------------------------------------|------------------------------------------------------------------------|---------------------|-----------------------------------------------|----------|----------------------------------|-------------------------------------------------------------------------------------------------------------------------------------------------------------------------------------------------------------------|
|                                              |                                                                                                          |                                                                              |                                                                        |                     |                                               |          |                                  | tamoxifen use, chemotherapy, birth index, age at menopause, tumour stage                                                                                                                                          |
| Lei <sup>9</sup> 2021, HKBCSS, China         | Prospective cohort cancer survivors (n=1226), mean age: 52.3 years, post-menopausal 48.5%, race: Chinese | Diagnosis:2011-2014, follow-up: median 54.1 months, loss to follow-up: 10.4% | Stage I 31.6%, II 48.2%, III 19.7%, ER+ 73.6%, PR + 56.4%, HER2+ 27.2% | FFQ                 | Overall mortality (n=98.0)                    | Q3 vs Q1 | 1.45 (0.82-2.56)<br>P trend=0.20 | Age at follow-up interview, BMI, chemotherapy, comorbidity, ER status, HER2 status, histology, hormonal therapy, menopausal status, physical activity, PR status, radiotherapy, total energy intake, tumour stage |
|                                              |                                                                                                          |                                                                              |                                                                        |                     | Breast cancer-specific mortality (n=88.0)     |          | 1.37 (0.76-2.49)<br>P trend=0.30 |                                                                                                                                                                                                                   |
|                                              |                                                                                                          |                                                                              |                                                                        |                     | Recurrence (n=165.0)                          |          | 1.01 (0.64-1.59)<br>P trend=0.99 |                                                                                                                                                                                                                   |
|                                              |                                                                                                          |                                                                              |                                                                        |                     | HR+ Overall mortality (n=70.0)                |          | 1.31 (0.68-2.54)<br>P trend=0.42 |                                                                                                                                                                                                                   |
|                                              |                                                                                                          |                                                                              |                                                                        |                     | HR- Overall mortality (n=26.0)                |          | 1.89 (0.54-6.64)<br>P trend=0.32 |                                                                                                                                                                                                                   |
|                                              |                                                                                                          |                                                                              |                                                                        |                     | HR+ Breast cancer-specific mortality (n=64.0) |          | 1.36 (0.68-2.73)<br>P trend=0.39 |                                                                                                                                                                                                                   |
|                                              |                                                                                                          |                                                                              |                                                                        |                     | HR- Breast cancer-specific mortality (n=22.0) |          | 1.79 (0.44-7.35)<br>P trend=0.45 |                                                                                                                                                                                                                   |
|                                              |                                                                                                          |                                                                              |                                                                        |                     | HR+ Recurrence (n=117.0)                      |          | 1.17 (0.71-1.94)<br>P trend=0.53 |                                                                                                                                                                                                                   |

| Author, year, study name, country, WCRF Code | Study description                                                                                                | Time of diagnosis and follow-up                                                                                                                              | Disease characteristic s treatment                                                                          | Exposure assessment                                                                                                           | Outcome (Events)                          | Contrast | RR (95% CI)                      | Covariates                                                                                                                                                 |
|----------------------------------------------|------------------------------------------------------------------------------------------------------------------|--------------------------------------------------------------------------------------------------------------------------------------------------------------|-------------------------------------------------------------------------------------------------------------|-------------------------------------------------------------------------------------------------------------------------------|-------------------------------------------|----------|----------------------------------|------------------------------------------------------------------------------------------------------------------------------------------------------------|
|                                              |                                                                                                                  |                                                                                                                                                              |                                                                                                             |                                                                                                                               | HR- Recurrence (n=45.0)                   |          | 0.81 (0.32-2.05)<br>P trend=0.51 |                                                                                                                                                            |
| <b>Western dietary pattern</b>               |                                                                                                                  |                                                                                                                                                              |                                                                                                             |                                                                                                                               |                                           |          |                                  |                                                                                                                                                            |
| Kwan <sup>8</sup> 2009, LACE, USA            | Prospective cohort of cancer survivors (n=1901), age range: 18-79 years, post-menopausal 65%, race: mostly White | Diagnosis: 1997-2000, follow-up: mean 4.2 years<br>226 deaths, 128 breast cancer mortality, 29 deaths from cardiovascular disease, 69 other causes of deaths | Stage I 48%, IIA 32.7%, IIB 16.3%, IIIA 3%<br>68.1%, ER+/PR+, 14.6%, ER+/PR-, 1.9%, ER-/PR+, 15.5%, ER-/PR- | Semi-quantitative FFQ, 122 items, self-administered, diet over the last 12 months assessed at 11 and 39 months post-diagnosis | Overall death (n=226)                     | Q4 vs Q1 | 1.53 (0.93-2.54)<br>P trend=0.05 | Age at diagnosis, energy intake, race, BMI, physical activity, smoking, menopausal status, weight change, tumour stage, hormone receptor status, treatment |
|                                              |                                                                                                                  |                                                                                                                                                              |                                                                                                             |                                                                                                                               | Breast cancer-specific mortality (n=128)  |          | 1.20 (0.62-2.32)<br>P trend=0.60 |                                                                                                                                                            |
|                                              |                                                                                                                  |                                                                                                                                                              |                                                                                                             |                                                                                                                               | Recurrence (n=268)                        |          | 0.98 (0.62-1.54)<br>P trend=0.94 |                                                                                                                                                            |
|                                              |                                                                                                                  |                                                                                                                                                              |                                                                                                             |                                                                                                                               | Non-breast-cancer-related death (n=69)    |          | 2.15 (0.97-4.77)<br>P trend=0.02 |                                                                                                                                                            |
| Lei <sup>9</sup> 2021, HKBCSS, China         | Prospective cohort of cancer survivors (n=1226), mean age: 52.3 years, post-menopausal 48.5%, race: Chinese      | Diagnosis:2011-2014, follow-up: median 54.1 months, loss to follow-up: 10.4%                                                                                 | Stage I 31.6%, II 48.2%, III 19.7%, ER + 73.6%, PR+ 56.4%, HER2+ 27.2%                                      | FFQ                                                                                                                           | Overall mortality (n=98.0)                | Q3 vs Q1 | 0.79 (0.41-1.52)<br>P trend=0.48 | Age at follow-up interview, BMI, chemotherapy, comorbidity, ER status, HER2 status, histology, hormonal therapy, Menopausal status,                        |
|                                              |                                                                                                                  |                                                                                                                                                              |                                                                                                             |                                                                                                                               | Breast cancer-specific mortality (n=88.0) |          | 0.90 (0.45-1.77)<br>P trend=0.75 |                                                                                                                                                            |
|                                              |                                                                                                                  |                                                                                                                                                              |                                                                                                             |                                                                                                                               | Recurrence (n=165.0)                      |          | 1.03 (0.61-1.75)<br>P trend=0.89 |                                                                                                                                                            |

| Author, year, study name, country, WCRF Code | Study description                                                                  | Time of diagnosis and follow-up                                                                                        | Disease characteristic s treatment | Exposure assessment                                                                | Outcome (Events)                              | Contrast | RR (95% CI)                      | Covariates                                                                                                                                                  |
|----------------------------------------------|------------------------------------------------------------------------------------|------------------------------------------------------------------------------------------------------------------------|------------------------------------|------------------------------------------------------------------------------------|-----------------------------------------------|----------|----------------------------------|-------------------------------------------------------------------------------------------------------------------------------------------------------------|
|                                              |                                                                                    |                                                                                                                        |                                    |                                                                                    | HR+ Overall mortality (n=70.0)                |          | 0.75 (0.35-1.60)<br>P trend=0.46 | physical activity, PR status, radiotherapy, total energy intake, tumour stage                                                                               |
|                                              |                                                                                    |                                                                                                                        |                                    |                                                                                    | HR- Overall mortality (n=26.0)                |          | 0.65 (0.16-2.65)<br>P trend=0.55 |                                                                                                                                                             |
|                                              |                                                                                    |                                                                                                                        |                                    |                                                                                    | HR+ Breast cancer-specific mortality (n=64.0) |          | 0.87 (0.39-1.95)<br>P trend=0.77 |                                                                                                                                                             |
|                                              |                                                                                    |                                                                                                                        |                                    |                                                                                    | HR- Breast cancer-specific mortality (n=22.0) |          | 0.93 (0.20-4.26)                 |                                                                                                                                                             |
|                                              |                                                                                    |                                                                                                                        |                                    |                                                                                    | HR+ Recurrence (n=117.0)                      |          | 1.21 (0.67-2.17)<br>P trend=0.50 |                                                                                                                                                             |
|                                              |                                                                                    |                                                                                                                        |                                    |                                                                                    | HR- Recurrence (n=45.0)                       |          | 0.65 (0.22-1.93)<br>P trend=0.43 |                                                                                                                                                             |
| Kroenke <sup>7</sup> 2005(a), NHS, USA       | Population-based cohort study (n=2619), age range: 30-55 years, race: mostly White | Diagnosis: 1982-1998, follow-up: median 9 years, until 2002, 414 deaths, 242 from breast cancer, 172 from other causes | Invasive breast cancer             | FFQ, diet measured closest to and at least 12 months after breast cancer diagnosis | All-cause mortality (n=414)                   | Q5 vs Q1 | 1.53 (1.03-2.29)<br>P trend=0.08 | Age, BMI, energy intake, smoking, physical activity, age of menarche, oral contraceptive, menopausal status, hormonal therapy, tamoxifen use, chemotherapy, |
|                                              |                                                                                    |                                                                                                                        |                                    |                                                                                    | Breast cancer-specific mortality (n=242)      |          | 1.01 (0.60-1.70)<br>P trend=0.99 |                                                                                                                                                             |
|                                              |                                                                                    |                                                                                                                        |                                    |                                                                                    | Non-breast-cancer-related death (n=172)       |          | 2.31 (1.23-4.32)<br>P trend=0.04 |                                                                                                                                                             |

| Author, year, study name, country, WCRF Code | Study description                                                                                                | Time of diagnosis and follow-up                                                                                                                     | Disease characteristic s treatment                                                                                                        | Exposure assessment                                    | Outcome (Events)         | Contrast                                                                        | RR (95% CI)      | Covariates                                                                 |
|----------------------------------------------|------------------------------------------------------------------------------------------------------------------|-----------------------------------------------------------------------------------------------------------------------------------------------------|-------------------------------------------------------------------------------------------------------------------------------------------|--------------------------------------------------------|--------------------------|---------------------------------------------------------------------------------|------------------|----------------------------------------------------------------------------|
|                                              |                                                                                                                  |                                                                                                                                                     |                                                                                                                                           |                                                        |                          |                                                                                 |                  | birth index, age at menopause, tumour stage                                |
| <b>Healthy Pattern</b>                       |                                                                                                                  |                                                                                                                                                     |                                                                                                                                           |                                                        |                          |                                                                                 |                  |                                                                            |
| Pierce <sup>11</sup> 2007(b), WHEL, USA      | Secondary analysis of clinical trials (n=1490), mean age: 50 years, pre- and post-menopausal, race: mostly White | Diagnosis: 1991-2000, follow-up: average 6.7 years, until 2005, 135 deaths, 118 from breast cancer, 10 from other cancers, 7 from non-cancer causes | Stage I 40%, II 45%, III 15%, grade I 15.9%, II 39.8%, III 35.8%, unknown 8.3%, ER+/PR+ 63.1%, ER+/PR- 10.8%, ER-/PR+ 5.1%, ER-/PR- 20.8% | 24-hour recall, at an average 20 months post-diagnosis | Overall morality (n=135) | Healthy pattern (fruit and vegetables, physical activity), high/high vs low/low | 0.56 (0.31-0.98) | Age, alcohol intake, receptor status, time from diagnosis to randomization |

Abbreviations: CPS-II, Cancer Prevention Study II Nutrition Cohort; HEAL, Health, Eating, Activity, and Lifestyle Study; IWHS, Iowa Women's Health Study; LACE, Life After Cancer Epidemiology; NHS, Nurses' Health Study; WHI, Women's Health Initiative; WHEL; Women's Healthy Eating and Living,

**Supplementary Table S8. Descriptive table of the included observational studies of post-diagnosis fruit and vegetable intake and breast cancer prognosis**

| Author, year, study name, country, WCRF Code      | Study description                | Time of diagnosis and follow-up                                                | Disease characteristics treatment   | Exposure assessment                                       | Outcome (Events)                           | Contrast                | RR (95% CI)      | Covariates                                                                                                                                                                                                                                                                                    |
|---------------------------------------------------|----------------------------------|--------------------------------------------------------------------------------|-------------------------------------|-----------------------------------------------------------|--------------------------------------------|-------------------------|------------------|-----------------------------------------------------------------------------------------------------------------------------------------------------------------------------------------------------------------------------------------------------------------------------------------------|
| <b>Fruit and vegetables</b>                       |                                  |                                                                                |                                     |                                                           |                                            |                         |                  |                                                                                                                                                                                                                                                                                               |
| Farvid <sup>31</sup> MS, 2020, NHS and NHSII, USA | Population-based cohort (n=8927) | Diagnosed: 1980-2010 (NHS) and 1991-2011 (NHSII); follow Up: Median 11.5 years | Invasive breast cancer. Stage I-III | FFQ 1980-2010 to 2014 (NHS) and 1991-2011 to 2015 (NHSII) | All-cause mortality (n=2521.0)             | 7.4 vs 2.2 serving/ day | 0.82 (0.71-0.94) | Age at diagnosis, age at menopause, alcohol intake, aspirin use, BMI change, calendar year, chemotherapy, diagnosis year, er/pr status, hormonal therapy, menopausal status, oral contraceptive, physical activity, prediagnosis BMI, race, radiotherapy, smoking, stage, study, time between |
|                                                   |                                  |                                                                                |                                     |                                                           | Cancer specific mortality (n=1070.0)       |                         | P trend=0.004    |                                                                                                                                                                                                                                                                                               |
|                                                   |                                  |                                                                                |                                     |                                                           | All-cause mortality (n=2521)               | Per 2 serving day       | 0.88 (0.71-1.09) |                                                                                                                                                                                                                                                                                               |
|                                                   |                                  |                                                                                |                                     |                                                           | Cancer specific mortality (n=1070.0)       |                         | P trend=0.55     |                                                                                                                                                                                                                                                                                               |
|                                                   |                                  |                                                                                |                                     |                                                           | Cardiovascular disease mortality (n=301.0) | 7.4 vs 2.2 serving/ day | 0.93 (0.88-0.98) |                                                                                                                                                                                                                                                                                               |
|                                                   |                                  |                                                                                |                                     |                                                           | ER positive All-cause mortality (n=1847)   |                         | 0.98 (0.90-1.06) |                                                                                                                                                                                                                                                                                               |
|                                                   |                                  |                                                                                |                                     |                                                           | ER negative All-cause mortality (n=445)    | Per 2 serving day       | 0.96 (0.63-1.45) |                                                                                                                                                                                                                                                                                               |
|                                                   | P trend=0.48                     |                                                                                |                                     |                                                           |                                            |                         |                  |                                                                                                                                                                                                                                                                                               |
|                                                   |                                  | 0.92 (0.87-0.98)                                                               |                                     |                                                           |                                            |                         |                  |                                                                                                                                                                                                                                                                                               |
|                                                   |                                  | 0.88 (0.77-1.00)                                                               |                                     |                                                           |                                            |                         |                  |                                                                                                                                                                                                                                                                                               |

| Author, year, study name, country, WCRF Code | Study description | Time of diagnosis and follow-up | Disease characteristics treatment | Exposure assessment | Outcome (Events)                                    | Contrast | RR (95% CI)      | Covariates                               |
|----------------------------------------------|-------------------|---------------------------------|-----------------------------------|---------------------|-----------------------------------------------------|----------|------------------|------------------------------------------|
|                                              |                   |                                 |                                   |                     | Stage I<br>All-cause mortality<br>(n=1279)          |          | 0.88 (0.82-0.95) | cancer diagnosis and exposure assessment |
|                                              |                   |                                 |                                   |                     | Stage II<br>All-cause mortality<br>(n=794)          |          | 0.91 (0.83-1.00) |                                          |
|                                              |                   |                                 |                                   |                     | Stage III<br>All-cause mortality<br>(n=448)         |          | 1.02 (0.89-1.15) |                                          |
|                                              |                   |                                 |                                   |                     | ER positive<br>Cancer specific mortality<br>(n=769) |          | 0.99 (0.90-1.08) |                                          |
|                                              |                   |                                 |                                   |                     | ER negative<br>Cancer specific mortality<br>(n=212) |          | 0.95 (0.79-1.13) |                                          |
|                                              |                   |                                 |                                   |                     | Stage I<br>Cancer specific mortality<br>(n=339)     |          | 0.93 (0.80-1.07) |                                          |
|                                              |                   |                                 |                                   |                     | Stage II<br>Cancer specific mortality<br>(n=397)    |          | 0.91 (0.79-1.03) |                                          |

| Author, year, study name, country, WCRF Code                                   | Study description                                      | Time of diagnosis and follow-up                                            | Disease characteristics treatment                                                                                                                                                                                                                                                                                       | Exposure assessment                                                                                                                                                                                                                                                                                                                                                  | Outcome (Events)                                                                                                                                                                        | Contrast                                                                                           | RR (95% CI)                                                                                                                                              | Covariates                                                                                                                                                                                                              |
|--------------------------------------------------------------------------------|--------------------------------------------------------|----------------------------------------------------------------------------|-------------------------------------------------------------------------------------------------------------------------------------------------------------------------------------------------------------------------------------------------------------------------------------------------------------------------|----------------------------------------------------------------------------------------------------------------------------------------------------------------------------------------------------------------------------------------------------------------------------------------------------------------------------------------------------------------------|-----------------------------------------------------------------------------------------------------------------------------------------------------------------------------------------|----------------------------------------------------------------------------------------------------|----------------------------------------------------------------------------------------------------------------------------------------------------------|-------------------------------------------------------------------------------------------------------------------------------------------------------------------------------------------------------------------------|
|                                                                                |                                                        |                                                                            |                                                                                                                                                                                                                                                                                                                         |                                                                                                                                                                                                                                                                                                                                                                      | Stage III Cancer specific mortality (n=334)                                                                                                                                             |                                                                                                    | 1.05 (0.91-1.21)                                                                                                                                         |                                                                                                                                                                                                                         |
| McCullough <sup>1</sup><br><sup>5</sup> ML, 2016, CPS-II Nutrition Cohort, USA | Population-based cohort, (n= 2152) mean age:70.7 years | Recruitment between baseline (1992-1993) and June 2011 Follow up= 19 years | Locally and regionally staged breast cancer ER+ 79.5%; ER- 9.7%; PR+ 57.2%; PR- 21.1%, local: 77.3%, regional: 22.7% grade at diagnosis: well differentiated 22.6%, moderately differentiated: 39.0%; poorly or undifferentiated: 23.7%, surgery: 86.1%, chemotherapy: 22.9%, radiation: 56.0%, targeted therapy: 62.4% | 68-item block FFQ with baseline survey in 1992 (12 months post-diagnosis to allow for completion of active treatment) and modified 152-item Harvard FFQ with follow-up surveys between 1999-2003<br>The mean SD time between 1992 baseline to diagnosis was 8.4 ± 4.8 years and from breast cancer diagnosis to post-diagnostic diet assessment was 3.3 ± 1.5 years. | All-cause mortality (n=640)<br><br>Breast cancer-specific mortality (n=192)<br><br>Mortality not including breast cancer or CVD (n=319)<br><br>Cardiovascular disease mortality (n=129) | Combination of meeting “five a day” and consuming a variety of fruits and vegetables 3 vs. 0 score | 1.03 (0.80-1.33)<br>P trend=0.55<br><br>1.31 (0.83-2.06)<br>P trend=0.19<br><br>0.93 (0.65-1.34)<br>P trend=0.73<br><br>0.80 (0.45-1.44)<br>P trend=0.85 | Age at diagnosis, diagnosis year, tumour stage, grade, oestrogen and progesterone receptor status, initial treatment, BMI, smoking status, physical activity, energy intake, total grain, red and processed meat intake |



| Author, year, study name, country, WCRF Code      | Study description                                                                                                                                                                                                                                                                               | Time of diagnosis and follow-up                                                                                                                                                                         | Disease characteristics treatment                                                                                                                                                                                                                                                                | Exposure assessment                                                                                                                                                                                   | Outcome (Events)                                  | Contrast                             | RR (95% CI)                                          | Covariates                                                                                                               |
|---------------------------------------------------|-------------------------------------------------------------------------------------------------------------------------------------------------------------------------------------------------------------------------------------------------------------------------------------------------|---------------------------------------------------------------------------------------------------------------------------------------------------------------------------------------------------------|--------------------------------------------------------------------------------------------------------------------------------------------------------------------------------------------------------------------------------------------------------------------------------------------------|-------------------------------------------------------------------------------------------------------------------------------------------------------------------------------------------------------|---------------------------------------------------|--------------------------------------|------------------------------------------------------|--------------------------------------------------------------------------------------------------------------------------|
| Pierce <sup>11</sup> JP, 2007(b), WHEL            | Follow-up study of 1490 women age ≤70 years, average age, 50 years Randomly assigned to the control group in a dietary trial within 48 months of diagnosis (average, 24 months) between 1995 and 2000. Enrolment was an average of 2 years post-diagnosis all have completed primary treatments | Diagnosed: 1991-2000 Follow up= 6.7 years, until 2005. 135 total deaths, 118 breast cancer mortality, 10 deaths from other cancers, 7 non-cancer deaths, 236 breast cancer events Lost-to-follow up n=7 | Early stage breast cancer 40% stage I (≥1cm), 45% stage II, 15% stage III, 15.9%. 63.1% ER+/PR+, 10.8% ER+/PR-, 5.1%ER-/PR+, 20.8% ER-/PR-. Grade I 39.8%, grade II 35.8%, grade III 8.3%, unknown 31.4%, none-chemotherapy, 25.7% nonanthracycline, 42.8% anthracycline; 42% adjuvant tamoxifen | At baseline four 24-hr dietary recalls on random days during a 3-week period telephone-based dietary assessment Use plasma carotenoid concentrations to validate reported fruit and vegetables intake | Mortality (n=135)                                 | 6.94-19.96 vs. 0.33-3.43 serving/day | 0.63<br>P categorical =0.02                          | Univariate (age) stage, grade, BMI, physical activity, were not statistically significant in initial multivariate models |
| <b>Fruits</b>                                     |                                                                                                                                                                                                                                                                                                 |                                                                                                                                                                                                         |                                                                                                                                                                                                                                                                                                  |                                                                                                                                                                                                       |                                                   |                                      |                                                      |                                                                                                                          |
| Farvid <sup>31</sup> MS, 2020, NHS and NHSII, USA | Population-based cohort (n=8927)                                                                                                                                                                                                                                                                | Diagnosed: 1980-2010 (NHS) and 1991-2011 (NHSII) follow Up: Median 11.5 years                                                                                                                           | Invasive breast cancer, Stage I-III                                                                                                                                                                                                                                                              | FFQ 1980-2010 to 2014 (NHS) and 1991-2011 to 2015 (NHSII)                                                                                                                                             | All-cause mortality (n=2521.0)<br>Cancer specific | 2.8 vs 0.5 serving/ day              | 0.93 (0.81-1.07)<br>P trend=0.18<br>1.03 (0.83-1.26) | Age at diagnosis, age at menopause, alcohol intake, aspirin use,                                                         |

| Author, year, study name, country, WCRF Code | Study description | Time of diagnosis and follow-up | Disease characteristics treatment | Exposure assessment | Outcome (Events)                           | Contrast                | RR (95% CI)                      | Covariates                                                                                                                                                                                                                                                            |
|----------------------------------------------|-------------------|---------------------------------|-----------------------------------|---------------------|--------------------------------------------|-------------------------|----------------------------------|-----------------------------------------------------------------------------------------------------------------------------------------------------------------------------------------------------------------------------------------------------------------------|
|                                              |                   |                                 |                                   |                     | mortality (n=1070.0)                       |                         | P trend=0.93                     | BMI change, calendar year, chemotherapy, diagnosis year, er/pr status, hormonal therapy, menopausal status, oral contraceptive, physical activity, prediagnosis BMI, race, radiotherapy, smoking, stage, study, time between cancer diagnosis and exposure assessment |
|                                              |                   |                                 |                                   |                     | All-cause mortality (n=2521)               | Per 2 serving day       | 0.93 (0.83-1.03)                 |                                                                                                                                                                                                                                                                       |
|                                              |                   |                                 |                                   |                     | Cancer specific mortality (n=1070.0)       |                         | 1.01 (0.85-1.19)                 |                                                                                                                                                                                                                                                                       |
|                                              |                   |                                 |                                   |                     | Cardiovascular disease mortality (n=311.0) | 2.8 vs 0.5 serving/ day | 1.27 (0.85-1.88)<br>P trend=0.39 |                                                                                                                                                                                                                                                                       |
|                                              |                   |                                 |                                   |                     | ER positive All-cause mortality (n=1847)   | Per 2 serving day       | 0.94 (0.83-1.07)                 |                                                                                                                                                                                                                                                                       |
|                                              |                   |                                 |                                   |                     | ER negative All-cause mortality (n=445)    |                         | 0.82 (0.62-1.08)                 |                                                                                                                                                                                                                                                                       |
|                                              |                   |                                 |                                   |                     | Stage I All-cause mortality (n=1279)       |                         | 0.79 (0.68-0.93)                 |                                                                                                                                                                                                                                                                       |
|                                              |                   |                                 |                                   |                     | Stage II All-cause mortality (n=794)       |                         | 1.00 (0.82-1.23)                 |                                                                                                                                                                                                                                                                       |
|                                              |                   |                                 |                                   |                     | ER positive Cancer specific                |                         | 1.02 (0.84-1.24)                 |                                                                                                                                                                                                                                                                       |

| Author, year, study name, country, WCRF Code          | Study description                                                                                                                        | Time of diagnosis and follow-up                                      | Disease characteristics treatment | Exposure assessment                                                                                                                                   | Outcome (Events)                              | Contrast        | RR (95% CI)         | Covariates                              |
|-------------------------------------------------------|------------------------------------------------------------------------------------------------------------------------------------------|----------------------------------------------------------------------|-----------------------------------|-------------------------------------------------------------------------------------------------------------------------------------------------------|-----------------------------------------------|-----------------|---------------------|-----------------------------------------|
|                                                       |                                                                                                                                          |                                                                      |                                   |                                                                                                                                                       | mortality (n=769)                             |                 |                     |                                         |
|                                                       |                                                                                                                                          |                                                                      |                                   |                                                                                                                                                       | ER negative Cancer specific mortality (n=212) |                 | 0.93 (0.64-1.36)    |                                         |
|                                                       |                                                                                                                                          |                                                                      |                                   |                                                                                                                                                       | Stage I Cancer specific mortality (n=339)     |                 | 0.87 (0.61-1.16)    |                                         |
|                                                       |                                                                                                                                          |                                                                      |                                   |                                                                                                                                                       | Stage II Cancer specific mortality (n=397)    |                 | 0.94 (0.72-1.24)    |                                         |
|                                                       |                                                                                                                                          |                                                                      |                                   |                                                                                                                                                       | Stage III Cancer specific mortality (n=334)   |                 | 1.21 (0.89-1.65)    |                                         |
| Williams <sup>32</sup> PT, 2014, NRWHS, United States | Prospective cohort (n= 986) breast cancer survivors identified through the baseline questionnaires of the National Runners' and Walkers' | Follow up= 9.1 years (9.08 ± 0.83 years), 46 died from breast cancer | No specific information provided  | Self-reported information on diet using a baseline questionnaire mean 7.9± 7.3 years after diagnosis questions on intake of meat, fruit, correlations | Breast cancer-specific mortality (n=46)       | Per 1 piece/day | 1.104 (0.866-1.346) | Age, race, exercise (runner vs. Walker) |

| Author, year, study name, country, WCRF Code           | Study description                                                                                                  | Time of diagnosis and follow-up                                                                                             | Disease characteristics treatment                                                                                                          | Exposure assessment                                                                                             | Outcome (Events)                                                   | Contrast                | RR (95% CI)                                                                         | Covariates                                                                                                                                                                                                          |
|--------------------------------------------------------|--------------------------------------------------------------------------------------------------------------------|-----------------------------------------------------------------------------------------------------------------------------|--------------------------------------------------------------------------------------------------------------------------------------------|-----------------------------------------------------------------------------------------------------------------|--------------------------------------------------------------------|-------------------------|-------------------------------------------------------------------------------------|---------------------------------------------------------------------------------------------------------------------------------------------------------------------------------------------------------------------|
|                                                        | Health Surveys, survivors diagnosed 7.9 years before baseline                                                      |                                                                                                                             |                                                                                                                                            | for these diets were obtained from a 4-day diet records from 100 men (r=0.46 for red meat and r=0.38 for fruit) |                                                                    |                         |                                                                                     |                                                                                                                                                                                                                     |
| Beasley <sup>33</sup><br>JM, 2011, CWLS, United States | Follow up of cases of population-based case-control studies (n= 4441) age range: 20-79 years, 73.3% postmenopausal | Diagnosed: 1987-1999, follow up= 5.5 years, until 2005, 525 deaths, 137 from breast cancer, 132 from cardiovascular disease | Primary invasive breast cancer, 72.8% local, 27.2% regional, surgery 97.9%, radiotherapy 49.8%, hormonal therapy 57.8%, chemotherapy 31.9% | Validated 126-item FFQ of post-diagnosis behaviour from 1998-2001                                               | All-cause survival (n = 525)<br><br>Breast cancer survival (n=137) | 2.5 vs. 0.1 serving/day | 1.38 (0.80 - 1.30)<br><br>P trend=0.67<br><br>1.39 (0.64- 2.99)<br><br>P trend=0.16 | Age, residence, menopausal status, smoking, tumour stage, alcohol intake, history of hormonal replacement therapy, interval between diagnosis and diet assessment, BMI, physical activity, breast cancer treatment, |

| Author, year, study name, country, WCRF Code                                                        | Study description                                                                                                    | Time of diagnosis and follow-up                                                                      | Disease characteristics treatment    | Exposure assessment                                                                                                                                                                                                      | Outcome (Events)            | Contrast  | RR (95% CI)                            | Covariates                                                                                                                                                                                                                                                                       |
|-----------------------------------------------------------------------------------------------------|----------------------------------------------------------------------------------------------------------------------|------------------------------------------------------------------------------------------------------|--------------------------------------|--------------------------------------------------------------------------------------------------------------------------------------------------------------------------------------------------------------------------|-----------------------------|-----------|----------------------------------------|----------------------------------------------------------------------------------------------------------------------------------------------------------------------------------------------------------------------------------------------------------------------------------|
|                                                                                                     |                                                                                                                      |                                                                                                      |                                      |                                                                                                                                                                                                                          |                             |           |                                        | energy intake                                                                                                                                                                                                                                                                    |
| Holmes <sup>34</sup><br>MD, 1999, NHS, United States<br>(superseded by Farvid <sup>31</sup> , 2020) | Cancer survivors of population-based prospective cohort study (n= 1982) pre- and post-menopausal. Mean age: 54 years | Diagnosed: 1976-1990, mean follow up=157 months, until 1994, 378 deaths, 326 breast cancer mortality | Invasive breast carcinoma, grade 1-3 | Validated FFQ's in 1980, 1984, 1986, and 1990<br>Intakes of total calories, alcohol and 83 nutrients were assessed, mean interval between diagnosis of breast carcinoma and diet assessment was 24 months (SD=18 months) | All-cause mortality (n=378) | Q4 vs. Q1 | 1.07 (0.77 - 1.49)<br><br>P trend=0.40 | Age, time between exposure assessment and cancer diagnosis, calendar year of diagnosis, oral contraceptive use, postmenopausal hormone therapy use, smoking, age at first birth and parity, number of metastatic lymph nodes, tumour size, BMI, menopausal status, energy intake |

| Author, year, study name, country, WCRF Code    | Study description                | Time of diagnosis and follow-up                                              | Disease characteristics treatment   | Exposure assessment                                       | Outcome (Events)                           | Contrast                | RR (95% CI)                       | Covariates                                                                                                                                                                                                                                                                       |
|-------------------------------------------------|----------------------------------|------------------------------------------------------------------------------|-------------------------------------|-----------------------------------------------------------|--------------------------------------------|-------------------------|-----------------------------------|----------------------------------------------------------------------------------------------------------------------------------------------------------------------------------------------------------------------------------------------------------------------------------|
| <b>Vegetables</b>                               |                                  |                                                                              |                                     |                                                           |                                            |                         |                                   |                                                                                                                                                                                                                                                                                  |
| Farvid <sup>31</sup> , 2020, NHS and NHSII, USA | Population-based cohort (n=8927) | Diagnosed:1980-2010 (NHS) and 1991-2011 (NHSII) follow Up: Median 11.5 years | Invasive breast cancer. Stage I-III | FFQ 1980-2010 to 2014 (NHS) and 1991-2011 to 2015 (NHSII) | All-cause mortality (n=2521.0)             | 5.1 vs 1.4 serving/ day | 0.84 (0.72-0.97)<br>P trend=0.001 | Age at diagnosis, age at menopause, alcohol intake, aspirin use, BMI change, calendar year, chemotherapy, diagnosis year, ER/PR status, hormonal therapy, menopausal status, oral contraceptive, physical activity, prediagnosis BMI, race, radiotherapy, smoking, stage, study, |
|                                                 |                                  |                                                                              |                                     |                                                           |                                            | Per 2 serving day       | 0.89 (0.82-0.95)                  |                                                                                                                                                                                                                                                                                  |
|                                                 |                                  |                                                                              |                                     |                                                           | Cancer specific mortality (n=1070.0)       |                         | 0.94 (0.84-1.05)                  |                                                                                                                                                                                                                                                                                  |
|                                                 |                                  |                                                                              |                                     |                                                           | Cardiovascular disease mortality (n=311.0) | 5.1 vs 1.4 serving/ day | 0.76 (0.49-1.16)<br>P trend=0.08  |                                                                                                                                                                                                                                                                                  |
|                                                 |                                  |                                                                              |                                     |                                                           | ER positive All-cause mortality (n=1847)   | Per 2 serving day       | 0.88 (0.81-0.96)                  |                                                                                                                                                                                                                                                                                  |
|                                                 |                                  |                                                                              |                                     |                                                           | ER negative All-cause mortality (n=445)    |                         | 0.84 (0.70-1.01)                  |                                                                                                                                                                                                                                                                                  |
|                                                 |                                  |                                                                              |                                     |                                                           | Stage I All-cause mortality (n=1279)       |                         | 0.89 (0.77-0.95)                  |                                                                                                                                                                                                                                                                                  |

| Author, year, study name, country, WCRF Code | Study description | Time of diagnosis and follow-up | Disease characteristics treatment | Exposure assessment | Outcome (Events)                              | Contrast | RR (95% CI)      | Covariates                                            |
|----------------------------------------------|-------------------|---------------------------------|-----------------------------------|---------------------|-----------------------------------------------|----------|------------------|-------------------------------------------------------|
|                                              |                   |                                 |                                   |                     | Stage II All-cause mortality (n=794)          |          | 0.86 (0.75-0.98) | time between cancer diagnosis and exposure assessment |
|                                              |                   |                                 |                                   |                     | Stage III All-cause mortality (n=448)         |          | 0.92 (0.77-1.09) |                                                       |
|                                              |                   |                                 |                                   |                     | ER positive Cancer specific mortality (n=769) |          | 0.95 (0.83-1.08) |                                                       |
|                                              |                   |                                 |                                   |                     | ER negative Cancer specific mortality (n=212) |          | 0.95 (0.74-1.22) |                                                       |
|                                              |                   |                                 |                                   |                     | Stage I Cancer specific mortality (n=339)     |          | 0.96 (0.79-1.17) |                                                       |
|                                              |                   |                                 |                                   |                     | Stage II Cancer specific mortality (n=397)    |          | 0.84 (0.70-1.01) |                                                       |
|                                              |                   |                                 |                                   |                     | Stage III Cancer specific mortality (n=334)   |          | 0.96 (0.79-1.16) |                                                       |

| Author, year, study name, country, WCRF Code | Study description                                                                    | Time of diagnosis and follow-up                                                    | Disease characteristics treatment | Exposure assessment                                                                                                                                                                                                | Outcome (Events)              | Contrast                                  | RR (95% CI)                                            | Covariates                                                                                                                                                             |
|----------------------------------------------|--------------------------------------------------------------------------------------|------------------------------------------------------------------------------------|-----------------------------------|--------------------------------------------------------------------------------------------------------------------------------------------------------------------------------------------------------------------|-------------------------------|-------------------------------------------|--------------------------------------------------------|------------------------------------------------------------------------------------------------------------------------------------------------------------------------|
| Nechuta <sup>35</sup> S, 2013, ABCPP         | Pooled analysis of 4 cohorts: LACE, WHEL, NHS, SBCSS (n=11390), mean age: 56.9 years | Diagnosed between 1990-2006, mean follow up= 9 years, 1725 deaths 1421 recurrences | Invasive breast cancer            | FFQ, mean of 22 months post-diagnosis, validated for major nutrients and/or food groups or based on a validated questionnaire SBCSS 29 items, WHEL Arizona Food Frequency Questionnaire 153-items, LACE >100 items | <b>Cruciferous vegetables</b> |                                           |                                                        | Age at diagnosis, ER/PR status, TNM stage, chemotherapy, surgery, radiotherapy, hormonal therapy, smoking, BMI, exercise, menopausal status, race/ethnicity, education |
|                                              |                                                                                      |                                                                                    |                                   |                                                                                                                                                                                                                    | Total mortality (n=1725)      | ≥78 vs. <39 g/ day                        | 1.03 (0.88-1.20)<br>P trend=0.82                       |                                                                                                                                                                        |
|                                              |                                                                                      |                                                                                    |                                   |                                                                                                                                                                                                                    | Total mortality ER-positive   | Q4 vs Q1<br>Q4 vs Q1<br>≥78 vs. <39 g/day | 0.93 (0.79-1.09)<br>P trend=0.35                       |                                                                                                                                                                        |
|                                              |                                                                                      |                                                                                    |                                   |                                                                                                                                                                                                                    | Total mortality ER-negative   |                                           | 1.11 (0.84-1.45)<br>P trend=0.13<br>P-interaction=0.53 |                                                                                                                                                                        |
|                                              |                                                                                      |                                                                                    |                                   |                                                                                                                                                                                                                    | Total mortality Stage I-II    |                                           | 1.02 (0.87-1.20)<br>P trend=0.60                       |                                                                                                                                                                        |
|                                              |                                                                                      |                                                                                    |                                   |                                                                                                                                                                                                                    | Total mortality Sage III      |                                           | 0.94 (0.73-1.22)<br>P trend=0.72<br>P-interaction=0.76 |                                                                                                                                                                        |
|                                              |                                                                                      |                                                                                    |                                   |                                                                                                                                                                                                                    | Total mortality Tamoxifen     |                                           | 0.91 (0.76-1.10)<br>P trend=0.30                       |                                                                                                                                                                        |
|                                              |                                                                                      |                                                                                    |                                   |                                                                                                                                                                                                                    | Total mortality               |                                           | 1.04 (0.74-1.47)                                       |                                                                                                                                                                        |



| Author, year, study name, country, WCRF Code | Study description | Time of diagnosis and follow-up | Disease characteristics treatment | Exposure assessment | Outcome (Events)                     | Contrast | RR (95% CI)                                            | Covariates |
|----------------------------------------------|-------------------|---------------------------------|-----------------------------------|---------------------|--------------------------------------|----------|--------------------------------------------------------|------------|
|                                              |                   |                                 |                                   |                     | No tamoxifen                         |          | P trend=0.87<br>P interaction=0.28                     |            |
|                                              |                   |                                 |                                   |                     | Breast cancer mortality              |          | 1.09 (0.92–1.30)<br>P trend=0.72                       |            |
|                                              |                   |                                 |                                   |                     | Breast cancer recurrence (n=1421)    |          | 1.05 (0.89–1.24)<br>P trend=0.60                       |            |
|                                              |                   |                                 |                                   |                     | Breast cancer recurrence (n=1421)    |          | 1.05 (0.89–1.24)<br>P trend=0.60                       |            |
|                                              |                   |                                 |                                   |                     | Breast cancer recurrence ER-positive |          | 1.05 (0.88–1.25)<br>P trend=0.65                       |            |
|                                              |                   |                                 |                                   |                     | Breast cancer recurrence ER-negative |          | 1.26 (0.92–1.72)<br>P trend=0.27<br>P interaction=0.77 |            |
|                                              |                   |                                 |                                   |                     | Breast cancer recurrence Stage I-II  |          | 1.14 (0.95–1.36)<br>P trend=0.28                       |            |

| Author, year, study name, country, WCRF Code                 | Study description                                                                     | Time of diagnosis and follow-up                                                            | Disease characteristics treatment                                                                       | Exposure assessment                                                       | Outcome (Events)                      | Contrast                 | RR (95% CI)                                            | Covariates                                                |
|--------------------------------------------------------------|---------------------------------------------------------------------------------------|--------------------------------------------------------------------------------------------|---------------------------------------------------------------------------------------------------------|---------------------------------------------------------------------------|---------------------------------------|--------------------------|--------------------------------------------------------|-----------------------------------------------------------|
|                                                              |                                                                                       |                                                                                            |                                                                                                         |                                                                           | Breast cancer recurrence Stage III    |                          | 1.05 (0.79-1.39)<br>P trend=0.82<br>P interaction=0.44 |                                                           |
|                                                              |                                                                                       |                                                                                            |                                                                                                         |                                                                           | Breast cancer recurrence Tamoxifen    |                          | 1.02 (0.84-1.24)<br>P trend=0.76                       |                                                           |
|                                                              |                                                                                       |                                                                                            |                                                                                                         |                                                                           | Breast cancer recurrence No tamoxifen |                          | 1.19 (0.80-1.75)<br>P trend=0.78<br>P interaction=0.53 |                                                           |
|                                                              |                                                                                       |                                                                                            |                                                                                                         |                                                                           | Non-breast cancer related mortality   |                          | 0.86 (0.69-1.08)<br>P trend=0.77                       |                                                           |
| Beasley <sup>33</sup><br>JM, 2011,<br>CWLS,<br>United States | Follow up of cases of population-based case-control study (n= 4441), age range: 20-79 | Diagnosed: 1987-1999, 42% of women completed the FFQ Follow up= 5.5 years, until 2005, 525 | Primary invasive breast cancer 72.8% local, 27.2% regional, surgery 97.9%, radiotherapy 49.8%, hormonal | Using a validated 126-item FFQ of post-diagnosis behaviour from 1998-2001 | <b>Cruciferous vegetables</b>         |                          |                                                        | Age, residence, menopausal status, smoking, tumour stage, |
|                                                              |                                                                                       |                                                                                            |                                                                                                         |                                                                           | All-cause survival                    | 0.7 vs. 0.1 serving/ day | 1.02 (0.8 - 1.3)<br>P trend=0.35                       |                                                           |
|                                                              |                                                                                       |                                                                                            |                                                                                                         |                                                                           | Breast cancer-                        |                          | 0.95 (0.59-1.54)                                       |                                                           |

| Author, year, study name, country, WCRF Code | Study description                                                                                                                                                                                      | Time of diagnosis and follow-up                                 | Disease characteristics treatment                                                                                                                                                                         | Exposure assessment                                                                                                                                           | Outcome (Events)                                 | Contrast                 | RR (95% CI)                        | Covariates                                                                                                                                                              |
|----------------------------------------------|--------------------------------------------------------------------------------------------------------------------------------------------------------------------------------------------------------|-----------------------------------------------------------------|-----------------------------------------------------------------------------------------------------------------------------------------------------------------------------------------------------------|---------------------------------------------------------------------------------------------------------------------------------------------------------------|--------------------------------------------------|--------------------------|------------------------------------|-------------------------------------------------------------------------------------------------------------------------------------------------------------------------|
|                                              | years, post-menopausal (73.3%)                                                                                                                                                                         | deaths, 137 from breast cancer, 132 from cardiovascular disease | therapy 57.8%, chemotherapy 31.9%                                                                                                                                                                         |                                                                                                                                                               | specific mortality                               |                          | P trend=0.86                       | alcohol intake, history of hormonal replacement therapy, interval between diagnosis and diet assessment, BMI, physical activity, breast cancer treatment, energy intake |
|                                              |                                                                                                                                                                                                        |                                                                 |                                                                                                                                                                                                           |                                                                                                                                                               | <b>Vegetables</b>                                |                          |                                    |                                                                                                                                                                         |
|                                              |                                                                                                                                                                                                        |                                                                 |                                                                                                                                                                                                           |                                                                                                                                                               | All-cause survival                               | 2.5 vs. 0.4 serving/ day | 1.44 (0.91-2.27)<br>P trend=0.35   |                                                                                                                                                                         |
|                                              |                                                                                                                                                                                                        |                                                                 |                                                                                                                                                                                                           |                                                                                                                                                               | Breast cancer-specific mortality                 |                          | 0.96 (0.38-2.45)<br>P trend=0.43   |                                                                                                                                                                         |
| Thomson <sup>36</sup> CA, 2011, WHEL         | Patients in the control arms of a randomised controlled trial of the effect of plant-based dietary patterns (n= 3080), Peri-, pre-, and postmenopausal, mean age: 51.2 years, enrolled on average 23.5 | Clinical trial conducted: 1995-2006, follow up = 7.3 years      | Invasive breast cancer 74.2% ER+, 24.5% ER-, 1.3% not done/unknown. AJCC stages: 38.5% I, 33.2% IIA, 12.5% IIB, 12.1% IIIA, 3.7% IIIC. Chemotherapy 70%, radiotherapy 61.5%, current tamoxifen use: 59.5% | Pre-scheduled 24 hours recall, questionnaire collected via telephone from study-trained dietary assessors over a 3-week period including weekday and weekends | <b>Cruciferous vegetable</b>                     | T3 vs. T1                |                                    | Time from diagnosis to study entry, menopausal status, intervention status, cancer stage, oestrogen receptor status, chemotherapy, BMI,                                 |
|                                              |                                                                                                                                                                                                        |                                                                 |                                                                                                                                                                                                           |                                                                                                                                                               | Breast cancer recurrence (n=487)                 |                          | 0.85 (0.69-1.06)                   |                                                                                                                                                                         |
|                                              |                                                                                                                                                                                                        |                                                                 |                                                                                                                                                                                                           |                                                                                                                                                               | Breast cancer recurrence Tamoxifen users (N=257) |                          | 0.65 (0.47-0.89)                   |                                                                                                                                                                         |
|                                              |                                                                                                                                                                                                        |                                                                 |                                                                                                                                                                                                           |                                                                                                                                                               | Breast cancer recurrence                         |                          | 1.08 (0.79-1.47)<br>P interaction= |                                                                                                                                                                         |

| Author, year, study name, country, WCRF Code      | Study description                                                                          | Time of diagnosis and follow-up                                          | Disease characteristics treatment    | Exposure assessment                                                                    | Outcome (Events)                                        | Contrast                     | RR (95% CI)                            | Covariates                                                  |
|---------------------------------------------------|--------------------------------------------------------------------------------------------|--------------------------------------------------------------------------|--------------------------------------|----------------------------------------------------------------------------------------|---------------------------------------------------------|------------------------------|----------------------------------------|-------------------------------------------------------------|
|                                                   | months post-diagnosis, completed treatment for Stage I, II or III (AJCC VI classification) |                                                                          |                                      |                                                                                        | Non-users of tamoxifen (n=230)                          |                              | 0.005                                  | physical activity, clinical site, tamoxifen use             |
|                                                   |                                                                                            |                                                                          |                                      |                                                                                        | <b>Vegetables</b>                                       |                              |                                        |                                                             |
|                                                   |                                                                                            |                                                                          |                                      |                                                                                        | Breast cancer recurrence (n=487)                        | T3 vs. T1                    | 0.69 (0.55-0.87)                       |                                                             |
|                                                   |                                                                                            |                                                                          |                                      |                                                                                        | Breast cancer recurrence Tamoxifen users (N=257)        |                              | 0.56 (0.41-0.77)                       |                                                             |
|                                                   |                                                                                            |                                                                          |                                      |                                                                                        | Breast cancer recurrence Non-users of tamoxifen (n=230) |                              | 0.77 (0.56-1.08)<br>P interaction=0.04 |                                                             |
| Holmes <sup>34</sup> MD, 1999, NHS, United States | Cancer survivors of population-based prospective cohort study                              | Diagnosed: 1976-1990, follow up= 157 months, until 1994, 378 deaths, 326 | Invasive breast carcinoma; grade 1-3 | Validated Food frequency questionnaires in 1980, 1984, 1986, and 1990 Intakes of total | <b>Vegetables</b>                                       |                              |                                        | Age, time between exposure assessment and cancer diagnosis, |
|                                                   |                                                                                            |                                                                          |                                      |                                                                                        | All-cause mortality (n=378)                             | >4.20 vs. ≤2.12 servings/day | 0.81 (0.59-1.11)<br>P trend=0.07       |                                                             |

| Author, year, study name, country, WCRF Code       | Study description                                                              | Time of diagnosis and follow-up                                                                                | Disease characteristics treatment                                                          | Exposure assessment                                                                                                                                    | Outcome (Events)                                                              | Contrast             | RR (95% CI)                      | Covariates                                                                                                                                                                                                           |
|----------------------------------------------------|--------------------------------------------------------------------------------|----------------------------------------------------------------------------------------------------------------|--------------------------------------------------------------------------------------------|--------------------------------------------------------------------------------------------------------------------------------------------------------|-------------------------------------------------------------------------------|----------------------|----------------------------------|----------------------------------------------------------------------------------------------------------------------------------------------------------------------------------------------------------------------|
| (superseded by Farvid <sup>31</sup> , 2020)        | (n= 1982) pre- and post-menopausal, mean age: 54 years                         | breast cancer mortality                                                                                        |                                                                                            | calories, alcohol and 83 nutrients were assessed, mean interval between diagnosis of breast carcinoma and diet assessment was 24 months (SD=18 months) | All-cause mortality With metastasis (N=250)                                   | Q4 vs Q1             | 0.90 (0.60-1.33)<br>P trend=0.53 | calendar year of diagnosis, oral contraceptive use, postmenopausal hormone therapy use, smoking, age at first birth and parity, number of metastatic lymph nodes, tumour size, BMI, menopausal status, energy intake |
|                                                    |                                                                                |                                                                                                                |                                                                                            |                                                                                                                                                        | All-cause mortality Without metastasis (N=128)                                |                      | 0.62 (0.36-1.07)<br>P trend=0.02 |                                                                                                                                                                                                                      |
| Hebert <sup>37</sup> J, 1998, MSKCC, United States | Prospective cohort of breast cancer survivors (n=95) pre- and post-menopausal, | Diagnosed: 1982-1984, follow up= 10 years, until 1991, 109 had a recurrence of their diseases, 87 total death, | Early-stage breast cancer, 57.1% ER+. TNM, 39.7%, stage I, 40.6% stage II, 19.7% stage III | 34-item semi-quantitative FFQ at cancer diagnosis and after two years when women were free from cancer                                                 | <b>Vegetable's change</b><br>Breast cancer-specific mortality Post-menopausal | 1 piece increase/day | 0.31<br>P=0.08                   | Tumour stage, age, vegetables, nbmis (proxy of total energy intake)                                                                                                                                                  |

| Author, year, study name, country, WCRF Code | Study description    | Time of diagnosis and follow-up | Disease characteristics treatment | Exposure assessment | Outcome (Events)                         | Contrast | RR (95% CI)    | Covariates |
|----------------------------------------------|----------------------|---------------------------------|-----------------------------------|---------------------|------------------------------------------|----------|----------------|------------|
|                                              | mean age: 52.2 years | 73 breast cancer mortality      |                                   |                     | Breast cancer recurrence Post-menopausal |          | 0.46<br>P=0.08 |            |

Abbreviations: ABCPP, After Breast Cancer Pooling Project; BCFR; Breast Cancer Family Registry; CWLS, Collaborative Women's Longevity Study; LACE, Life After Cancer Epidemiology; NHS, Nurses' Health Study; SBCCS, Shanghai Breast Cancer Genetics Study; WHEL; Women's Healthy Eating and Living

**Supplementary Table S9. Descriptive table of the included observational studies of post-diagnosis wholegrain intake and breast cancer prognosis**

| Publication , WCRF Code                    | Study description                                                                  | Time of diagnosis and follow-up                                                                            | Disease characteristics treatment                                                       | Exposure assessment                                           | Outcome (Events)                | Comparison                      | RR (95% CI)      | Covariates                                                                                                                                                       |                                                                                                                             |                  |
|--------------------------------------------|------------------------------------------------------------------------------------|------------------------------------------------------------------------------------------------------------|-----------------------------------------------------------------------------------------|---------------------------------------------------------------|---------------------------------|---------------------------------|------------------|------------------------------------------------------------------------------------------------------------------------------------------------------------------|-----------------------------------------------------------------------------------------------------------------------------|------------------|
| <b>Dairy Foods</b>                         |                                                                                    |                                                                                                            |                                                                                         |                                                               |                                 |                                 |                  |                                                                                                                                                                  |                                                                                                                             |                  |
| Andersen <sup>38</sup> 2020, DCH           | Population-based cohort study (n=977) Mean age: 66 years                           | Diagnosis year 1993 – 2013 Follow up = 7 years 175 total deaths, 121 breast cancer deaths, 152 recurrences | ER positive 78%, negative 16%, missing 6%                                               | FFQ, at baseline, 5 years after diagnosis                     | All-cause mortality (n=175)     | Continuous per 50g/day increase | 0.99 (0.88-1.12) | Age at diagnosis, year at diagnosis, time of follow-up since diagnosis, alcohol, smoking, physical activity, BMI, education tumour size, nodal status, ER status |                                                                                                                             |                  |
|                                            |                                                                                    |                                                                                                            |                                                                                         |                                                               | Breast cancer mortality (n=121) |                                 | 1.05 (0.93-1.21) |                                                                                                                                                                  |                                                                                                                             |                  |
|                                            |                                                                                    |                                                                                                            |                                                                                         |                                                               | Recurrence (n=152)              |                                 | 0.98 (0.83-1.13) |                                                                                                                                                                  |                                                                                                                             |                  |
|                                            |                                                                                    |                                                                                                            |                                                                                         |                                                               | All-cause mortality (n=175)     | Pre- to post-diagnosis changes  | 0.94 (0.84-1.06) |                                                                                                                                                                  | Age at diagnosis, year at diagnosis, time of follow-up since diagnosis, alcohol, smoking, physical activity, BMI, education |                  |
|                                            |                                                                                    |                                                                                                            |                                                                                         |                                                               | Breast cancer mortality (n=121) |                                 | 50g/day          |                                                                                                                                                                  |                                                                                                                             | 0.96 (0.84-1.11) |
|                                            |                                                                                    |                                                                                                            |                                                                                         |                                                               | Recurrence (n=152)              |                                 | 0.92 (0.79-1.07) |                                                                                                                                                                  |                                                                                                                             |                  |
| McCullough <sup>15</sup> 2016, CPS-II, USA | Population-based cohort study (n=2152), age range: 40-93 years, race: mostly White | Diagnosis: 1992-2011, follow-up: mean 9.9 years, 640 deaths, 192 from breast cancer, 129 from CVD          | Local 77.3%, regional 22.7%, grade well differentiated 22.6%, moderately differentiated | FFQ, self-administered at a minimum of 1 year after diagnosis | All-cause mortality (n=640)     | Q4 vs Q1                        | 1.09 (0.86-1.38) | age at diagnosis, diagnosis year, tumor stage, tumor grade, ER status, PR status, treatment, BMI, smoking status,                                                |                                                                                                                             |                  |
|                                            |                                                                                    |                                                                                                            |                                                                                         |                                                               | Breast cancer mortality (n=192) |                                 | 1.24 (0.81-1.88) |                                                                                                                                                                  |                                                                                                                             |                  |

| Publication , WCRF Code                           | Study description                                                                                                             | Time of diagnosis and follow-up                   | Disease characteristics treatment                                                                                                                     | Exposure assessment                                                        | Outcome (Events)                         | Comparison    | RR (95% CI)                      | Covariates                                                                                                                                                                                             |
|---------------------------------------------------|-------------------------------------------------------------------------------------------------------------------------------|---------------------------------------------------|-------------------------------------------------------------------------------------------------------------------------------------------------------|----------------------------------------------------------------------------|------------------------------------------|---------------|----------------------------------|--------------------------------------------------------------------------------------------------------------------------------------------------------------------------------------------------------|
|                                                   |                                                                                                                               |                                                   | 39.0%, poorly or unknown 23.7%, ER+:79.5%; ER-:9.7%; PR+:57.2%; PR-:21.1%                                                                             |                                                                            | Cardiovascular disease mortality (n=129) |               | 1.43 (0.82-2.5)                  | physical activity, energy intake, fruit and vegetable intake, red and processed meat                                                                                                                   |
|                                                   |                                                                                                                               |                                                   |                                                                                                                                                       |                                                                            | Other causes of death                    |               | 0.91 (0.64-1.29)                 |                                                                                                                                                                                                        |
| Beasley <sup>33</sup> , 2011, CWLS, United States | Follow up of cases of (population-based) case-control study (n=4441)<br>Age range: 20-79 years, 73% Post-menopausal 99% White | Diagnosis year: 1998-2001<br>Follow up= 5.5 years | Primary invasive breast cancer; Stages: 72.8% local, 27.2% regional, Surgery: 97.9%; Radiotherapy: 49.8%; Hormonal therapy: 57.8%; Chemotherapy:31.9% | Validated FFQ (126 items), 1-16 years after diagnosis (42% within 5 years) | All-cause mortality (n=525)              | 57 vs 7 g/day | 0.79 (0.59-1.08)<br>P trend=0.20 | Age, residence, menopausal status, smoking, stage, alcohol intake, hormonal therapy, interval between diagnosis and baseline interview, BMI, physical activity, breast cancer treatment, energy intake |
|                                                   |                                                                                                                               |                                                   |                                                                                                                                                       |                                                                            | Breast cancer mortality (n=137)          |               | 0.83 (0.46-1.48)<br>P trend=0.30 |                                                                                                                                                                                                        |

Abbreviations: CPS-II, Cancer Prevention Study-II Nutrition Cohort; CWLS, Collaborative Women's Longevity Study; DCH, Diet Cancer and Health study.



**Supplementary Table S10. Descriptive table of the included observational studies of post-diagnosis meat intake and breast cancer prognosis**

| Author, year, study name, country, WCRF Code | Study description                                                                                                                           | Time of diagnosis and follow-up | Disease characteristics treatment                                                  | Exposure assessment                                                                                               | Outcome (Events)             | Contrast                                  | RR (95% CI)                         | Covariates                                                                                                                                                                                                               |
|----------------------------------------------|---------------------------------------------------------------------------------------------------------------------------------------------|---------------------------------|------------------------------------------------------------------------------------|-------------------------------------------------------------------------------------------------------------------|------------------------------|-------------------------------------------|-------------------------------------|--------------------------------------------------------------------------------------------------------------------------------------------------------------------------------------------------------------------------|
| Holmes <sup>39</sup><br>MD, 2017,<br>NHS     | Prospective cohort (n=6348)<br>Mixed age range: 30-55 years. Patients were observed until death or June 1st, 2010, whichever occurred first | Follow up = 16 years            | Radiation therapy 54.6%, tamoxifen use 69%, chemo 35.8%<br>At baseline: ER +ve 81% | FFQ. Diet over the past year, assessed in baseline and follow-up questionnaires at least 12 months post-diagnosis | All-cause mortality          | <b>Red meat</b><br>Q5 vs. Q1              | 1.13 (0.96 - 1.33)<br>P trend =0.28 | Age, time since diagnosis, energy intake, BMI, weight change, age at first birth, parity, oral contraceptive, menopausal status, hormone therapy, aspirin use, tumour stage, radiation therapy, treatment, calendar year |
|                                              |                                                                                                                                             |                                 |                                                                                    |                                                                                                                   | Breast cancer mortality      |                                           | 1.08 (0.86 - 1.37)<br>P trend=0.84  |                                                                                                                                                                                                                          |
|                                              |                                                                                                                                             |                                 |                                                                                    |                                                                                                                   | Distant recurrence           |                                           | 1.03 (0.83 - 1.29)<br>P trend=0.93  |                                                                                                                                                                                                                          |
|                                              |                                                                                                                                             |                                 |                                                                                    |                                                                                                                   | All-cause mortality          | <b>Processed meat</b><br>Q5 vs. Q1        | 0.99 (0.84 - 1.16)<br>P trend=0.6   |                                                                                                                                                                                                                          |
|                                              |                                                                                                                                             |                                 |                                                                                    |                                                                                                                   | Breast cancer mortality      |                                           | 0.91 (0.73 - 1.14)<br>P trend=0.83  |                                                                                                                                                                                                                          |
|                                              |                                                                                                                                             |                                 |                                                                                    |                                                                                                                   | Distant recurrence           |                                           | 0.97 (0.79 - 1.20)<br>P trend=0.8   |                                                                                                                                                                                                                          |
|                                              |                                                                                                                                             |                                 |                                                                                    |                                                                                                                   | All-cause mortality          | <b>Meat</b><br>Q5 vs. Q1                  | 0.94 (0.79 - 1.11)<br>P trend=0.31  |                                                                                                                                                                                                                          |
|                                              |                                                                                                                                             |                                 |                                                                                    |                                                                                                                   | Breast cancer mortality      |                                           | 0.90 (0.70 - 1.15)<br>P trend=0.18  |                                                                                                                                                                                                                          |
|                                              |                                                                                                                                             |                                 |                                                                                    |                                                                                                                   | Distant recurrence           |                                           | 0.87 (0.69 - 1.09)<br>P trend=0.1   |                                                                                                                                                                                                                          |
|                                              |                                                                                                                                             |                                 |                                                                                    |                                                                                                                   | All-cause mortality (n=1847) | <b>Poultry</b><br>Q5 vs. Q1 servings/ day | 0.93 (0.79 - 1.08)<br>P trend=0.48  |                                                                                                                                                                                                                          |

| Author, year, study name, country, WCRF Code | Study description                                                                                      | Time of diagnosis and follow-up                                                    | Disease characteristics treatment                                                                                               | Exposure assessment                                                                                                       | Outcome (Events)                   | Contrast                                                                                                     | RR (95% CI)                        | Covariates                                                                                                                       |
|----------------------------------------------|--------------------------------------------------------------------------------------------------------|------------------------------------------------------------------------------------|---------------------------------------------------------------------------------------------------------------------------------|---------------------------------------------------------------------------------------------------------------------------|------------------------------------|--------------------------------------------------------------------------------------------------------------|------------------------------------|----------------------------------------------------------------------------------------------------------------------------------|
|                                              |                                                                                                        |                                                                                    |                                                                                                                                 |                                                                                                                           | Breast cancer mortality (n=919)    |                                                                                                              | 0.88 (0.70 - 1.10)<br>P trend=0.76 |                                                                                                                                  |
|                                              |                                                                                                        |                                                                                    |                                                                                                                                 |                                                                                                                           | Distant recurrence (n=1046)        |                                                                                                              | 0.85 (0.69 - 1.05)<br>P trend=0.39 |                                                                                                                                  |
|                                              |                                                                                                        |                                                                                    |                                                                                                                                 |                                                                                                                           | All-cause mortality (n=1847)       | <b>Poultry (with skin)</b><br>Q5 vs. Q1 servings/ day                                                        | 0.87 (0.74 - 1.01)<br>P trend=0.06 |                                                                                                                                  |
|                                              |                                                                                                        |                                                                                    |                                                                                                                                 | Breast cancer mortality (n=919)                                                                                           | 0.73 (0.59 - 0.91)<br>P trend=0.02 |                                                                                                              |                                    |                                                                                                                                  |
|                                              |                                                                                                        |                                                                                    |                                                                                                                                 |                                                                                                                           | All-cause mortality (n=1847)       | <b>Poultry (without skin)</b><br>Q5 vs. Q1 servings/ day                                                     | 1.06 (0.91 - 1.23)<br>P trend=0.08 |                                                                                                                                  |
|                                              |                                                                                                        |                                                                                    |                                                                                                                                 | Breast cancer mortality (n=919)                                                                                           | 1.16 (0.93 - 1.43)<br>P trend=0.06 |                                                                                                              |                                    |                                                                                                                                  |
| Parada <sup>40</sup> H Jr, 2017, LIBCSP, USA | Population-based prospective study (n= 1508) Pre- and post-menopausal Mean age: 58.8 years. Until 2014 | 1996-1997 Follow up= 17.6 years 597 deaths of which 237 were breast cancer related | In situ: 235 Invasive: 1273 ≤2cm 75.5% >2cm 24.5% Radiation 60.9% Chemotherapy 41.4% Hormone therapy 61.1% ER- 26.7%, ER+ 73.3% | Interview and questionnaire. Consumption of grilled, barbecued and smoked meat; pre- and post-diagnosis changes in intake | All-cause mortality (n=428)        | <b>Total grilled, barbecued, and smoked meat intake</b><br>High/high vs. low/low intake (pre/post-diagnosis) | 1.31 (0.96 - 1.78)                 | Age at diagnosis, marital status, Income, alcohol intake, BMI, physical activity, tumour size, lymph node involvement, oestrogen |
|                                              |                                                                                                        |                                                                                    |                                                                                                                                 |                                                                                                                           | Breast cancer mortality (n=126)    |                                                                                                              | 1.08 (0.63 – 1.83)                 |                                                                                                                                  |
|                                              |                                                                                                        |                                                                                    |                                                                                                                                 |                                                                                                                           | All-cause mortality (n=428)        | <b>Grilled, barbecued beef, lamb and pork intake</b>                                                         | 1.14 (0.87 - 1.51)                 |                                                                                                                                  |

| Author, year, study name, country, WCRF Code                    | Study description                 | Time of diagnosis and follow-up                                                      | Disease characteristics treatment                                                          | Exposure assessment                                                  | Outcome (Events)                                                   | Contrast                                                              | RR (95% CI)                                                                 | Covariates                                                              |
|-----------------------------------------------------------------|-----------------------------------|--------------------------------------------------------------------------------------|--------------------------------------------------------------------------------------------|----------------------------------------------------------------------|--------------------------------------------------------------------|-----------------------------------------------------------------------|-----------------------------------------------------------------------------|-------------------------------------------------------------------------|
|                                                                 |                                   |                                                                                      |                                                                                            |                                                                      | Breast cancer mortality (n=126)                                    | High/high vs. low/low intake (pre/post-diagnosis)                     | 1.24 (0.76 - 2.03)                                                          | receptor status                                                         |
|                                                                 |                                   |                                                                                      |                                                                                            |                                                                      | All-cause mortality (n=428)                                        | <b>Smoked beef, lamb, and pork intake</b>                             | 1.20 (0.91 - 1.59)                                                          |                                                                         |
|                                                                 |                                   |                                                                                      |                                                                                            |                                                                      | Breast cancer mortality (n=126)                                    | High/high vs. low/low intake (pre/post-diagnosis)                     | 1.19 (0.71 - 1.99)                                                          |                                                                         |
|                                                                 |                                   |                                                                                      |                                                                                            |                                                                      | All-cause mortality (n=428)                                        | <b>Grilled, barbecued poultry and fish intake</b>                     | 1.06 (0.79-1.43)                                                            |                                                                         |
|                                                                 |                                   |                                                                                      |                                                                                            |                                                                      | Breast cancer mortality (n=126)                                    | High/high vs. low/low intake                                          | 1.11 (0.66-1.88)                                                            |                                                                         |
|                                                                 |                                   |                                                                                      |                                                                                            |                                                                      | All-cause mortality (n=428)                                        | <b>Smoked poultry and fish</b>                                        | 0.88 (0.64-1.20)                                                            |                                                                         |
|                                                                 |                                   |                                                                                      |                                                                                            |                                                                      | Breast cancer mortality (n=126)                                    | Any/any vs. none/none intake                                          | 0.55 (0.31 – 0.97)                                                          |                                                                         |
| McCullough <sup>15</sup> ML, 2016, CPS-II Nutrition Cohort, USA | (n= 2152)<br>Mean age: 70.7 years | Follow up= 19 years.<br>Among the 4,452 women included in the analytic cohort, 1,204 | Local: 77.3%, regional: 22.7%<br>Grade at diagnosis: well differentiated 22.6%, moderately | FFQ – Block<br>On average 8.4 years before diagnosis<br>Minimum of 1 | All-cause mortality (n=640)<br><br>Breast cancer mortality (n=192) | <b>Red and processed meat intake</b><br><2.24 vs. ≥5.11 servings/week | 0.64 (0.49 - 0.84)<br><br>P trend=0.01<br>0.88 (0.54 - 1.43)<br>P trend=0.6 | Age at diagnosis, diagnosis year, tumour stage, tumour grade, oestrogen |

| Author, year, study name, country, WCRF Code                 | Study description                                                     | Time of diagnosis and follow-up                                                                                                                                                                                                                 | Disease characteristics treatment                                                                                                                                                                                                                           | Exposure assessment                                  | Outcome (Events)                                                                       | Contrast                              | RR (95% CI)                                                              | Covariates                                                                                                                                                         |
|--------------------------------------------------------------|-----------------------------------------------------------------------|-------------------------------------------------------------------------------------------------------------------------------------------------------------------------------------------------------------------------------------------------|-------------------------------------------------------------------------------------------------------------------------------------------------------------------------------------------------------------------------------------------------------------|------------------------------------------------------|----------------------------------------------------------------------------------------|---------------------------------------|--------------------------------------------------------------------------|--------------------------------------------------------------------------------------------------------------------------------------------------------------------|
|                                                              |                                                                       | deaths occurred, 398 specifically due to breast cancer, and 233 due to CVD. In the analytic cohort of 2,152 women with post-diagnostic diet information, there were 640 deaths during follow-up, 192 breast cancer specific deaths, and 129 CVD | differentiated 39.0%; poorly or undifferentiated 23.7%<br>Surgery: yes 86.1%; no 0.2%<br>Chemotherapy: yes 22.9%; no 56.4%<br>Radiation: yes 56.0%; no 28.5%<br>Targeted therapy: yes 62.4%; no 3.7%<br>ER+:79.5%;<br>ER-:9.7%;<br>PR+:57.2%;<br>PR-:21.1%. | year after diagnosis                                 | Cardiovascular disease (n=129)<br>Mortality not including breast cancer or CVD (n=319) |                                       | 0.52 (0.27 - 0.98)<br>P trend=0.11<br>0.57 (0.39 - 0.82)<br>P trend=0.02 | and progesterone receptor status, initial delivered treatment, BMI, smoking status, physical activity, energy intake, fruit and vegetable consumption, total grain |
| Williams <sup>32</sup><br>PT, 2014,<br>NRWHS                 | (n= 986)                                                              | Follow up= 9.1 years. 46 women died from breast cancer                                                                                                                                                                                          |                                                                                                                                                                                                                                                             | Questionnaire average 7.9 years post diagnosis       | Breast cancer mortality (n=46)                                                         | <b>Meat</b><br>Per 1 serving/day      | 0.53 (0.17 - 1.41)                                                       | Age, race, exercise                                                                                                                                                |
| Beasley <sup>33</sup><br>JM, 2011,<br>CWLS,<br>United States | Follow up of cases of population-based case-control studies (n= 4441) | Follow up= 5.5 years 525 deaths, 137 breast cancer deaths, 132 deaths from                                                                                                                                                                      | In situ: 0<br>Invasive: 4441<br>Stages: 72.8% local, 27.2% regional<br>Surgery: 97.9% yes                                                                                                                                                                   | FFQ within 5 years (range: 1–16 years) of diagnosis' | All-cause survival                                                                     | <b>Meat</b><br>Q4 vs. Q1 serving/ day | 1.12 (0.83 - 1.51)<br>P trend=0.46                                       | Age, residence, menopausal status, smoking, stage, alcohol intake,                                                                                                 |

| Author, year, study name, country, WCRF Code       | Study description                                                                                                              | Time of diagnosis and follow-up                                                                                                                | Disease characteristics treatment                                                            | Exposure assessment                              | Outcome (Events)                 | Contrast                                             | RR (95% CI)                                   | Covariates                                                                                                                          |
|----------------------------------------------------|--------------------------------------------------------------------------------------------------------------------------------|------------------------------------------------------------------------------------------------------------------------------------------------|----------------------------------------------------------------------------------------------|--------------------------------------------------|----------------------------------|------------------------------------------------------|-----------------------------------------------|-------------------------------------------------------------------------------------------------------------------------------------|
|                                                    | Mixed age range: 20-79 years<br>1998-2001 until 2005                                                                           | cardiovascular disease                                                                                                                         | Radiotherapy: 49.8% yes<br>Hormonal therapy: 57.8% yes<br>Chemotherapy: 31.9% yes            |                                                  | Breast cancer mortality (n=137)  |                                                      | 0.89 (0.50 - 1.60)<br>P trend=0.94            | hormonal therapy, interval between diagnosis and baseline interview, BMI, physical activity, breast cancer treatment, energy intake |
| Hebert <sup>37</sup> J, 1998, MSKCC, United States | Prospective cohort study of cancer survivors (n= 469)<br>Pre- (47.3%) and postmenopausal<br>Mean age:52.2 years<br>White 86.8% | 1982-1984<br>Follow up= 10 years max<br>87 deaths<br>73 breast cancer deaths<br>109 recurrences<br>Vital status obtained for all but one woman | Early-stage invasive breast cancer<br>TNM stage I 39.7%<br>II 40.6%, IIIa 19.7%<br>ER+ 57.1% | Measured at diagnosis and 2 years post-diagnosis | Breast cancer recurrence (n=109) | <b>Meat (all red meat including liver and bacon)</b> | 1.12 (0.66 – 1.89) P trend=0.67               | Stage, estrogen receptor, age, BMI, butter/margarine/lard, beer, menopausal status                                                  |
|                                                    |                                                                                                                                |                                                                                                                                                |                                                                                              |                                                  | Breast cancer mortality (n = 73) |                                                      | Premenopausal 1.93 (0.89 – 4.15) P trend=0.09 |                                                                                                                                     |
|                                                    |                                                                                                                                |                                                                                                                                                |                                                                                              |                                                  |                                  |                                                      | 1.43 (0.74 – 2.79) P trend=0.29               |                                                                                                                                     |
|                                                    | Premenopausal 2.60 (0.96 – 7.03) P trend=0.06                                                                                  |                                                                                                                                                |                                                                                              |                                                  |                                  |                                                      |                                               |                                                                                                                                     |

Abbreviations: CPS-II, Cancer Prevention Study II Nutrition Cohort; CWLS, Collaborative Women's Longevity Study; LIBCSP, Long Island Breast Cancer Study Project; NHS, Nurses' Health Study; NRWHS, National Runner's and Walker's Health study

**Supplementary Table S11. Descriptive table of the included observational studies of post-diagnosis fish intake and breast cancer prognosis**

| Author, year, study name, country, WCRF Code             | Study description                                                                                                                             | Time of diagnosis and follow-up                                                           | Disease characteristics treatment                                                                                                                 | Exposure assessment                                                                                                          | Outcome (Events)                | Contrast                                                                                  | RR (95% CI)                        | Covariates                                                                                                                                                                                                               |
|----------------------------------------------------------|-----------------------------------------------------------------------------------------------------------------------------------------------|-------------------------------------------------------------------------------------------|---------------------------------------------------------------------------------------------------------------------------------------------------|------------------------------------------------------------------------------------------------------------------------------|---------------------------------|-------------------------------------------------------------------------------------------|------------------------------------|--------------------------------------------------------------------------------------------------------------------------------------------------------------------------------------------------------------------------|
| Holmes <sup>39</sup><br>MD, 2017,<br>NHS,<br>USA         | Prospective cohort (n= 6348)<br>Mixed age range: 30-55years.<br>Patients were observed until death or June 1st 2010, whichever occurred first | Follow up= 16 years                                                                       | At baseline: ER +ve 81%<br>Radiation therapy 54.6%, tamoxifen use 69%, chemo 35.8%                                                                | FFQ, diet over the past year, assessed in baseline and follow-up questionnaires at least 12 months post-diagnosis            | All-cause mortality (n=1847)    | Fish Q5 vs. Q1 servings/day                                                               | 0.96 (0.82 - 1.13)<br>P trend=0.82 | Age, time since diagnosis, energy intake, BMI, weight change, age at first birth, parity, oral contraceptive, menopausal status, hormone therapy, aspirin use, tumour stage, radiation therapy, treatment, calendar year |
|                                                          |                                                                                                                                               |                                                                                           |                                                                                                                                                   |                                                                                                                              | Breast cancer mortality (n=919) |                                                                                           | 0.99 (0.80 - 1.24)<br>P trend=0.64 |                                                                                                                                                                                                                          |
|                                                          |                                                                                                                                               |                                                                                           |                                                                                                                                                   |                                                                                                                              | Distant recurrence (n=1046)     |                                                                                           | 0.93 (0.76 - 1.15)<br>P trend=0.87 |                                                                                                                                                                                                                          |
| Parada <sup>40</sup><br>H Jr,<br>2017,<br>LIBCSP,<br>USA | Population-based prospective study (n= 1508)<br>Pre and post-menopausal<br>Mean age: 58.8 years. Until 2014                                   | 1996-1997<br>Follow up = 17.6 years<br>597 deaths of which 237 were breast cancer related | In situ: 235<br>Invasive: 1273<br>≤2cm 75.5% >2cm 24.5%<br>Radiation 60.9%<br>Chemotherapy 41.4%<br>Hormone therapy 61.1%<br>ER- 26.7%, ER+ 73.3% | Interview and questionnaire.<br>Consumption of grilled, barbecued and smoked meat; pre- and post-diagnosis changes in intake | All-cause mortality (n=428)     | Grilled, barbecued poultry, and fish intake<br>High/high vs. low-low (pre/post-diagnosis) | 1.06 (0.79 - 1.43)                 | Age at diagnosis, marital status, income, alcohol intake, BMI, physical activity, tumour size, lymph node involvement, and oestrogen receptor status                                                                     |
|                                                          |                                                                                                                                               |                                                                                           |                                                                                                                                                   |                                                                                                                              | Breast cancer mortality (n=126) |                                                                                           | 1.11 (0.66 - 1.88)                 |                                                                                                                                                                                                                          |
|                                                          |                                                                                                                                               |                                                                                           |                                                                                                                                                   |                                                                                                                              | All- cause mortality (n=428)    |                                                                                           | 0.88 (0.64 - 1.20)                 |                                                                                                                                                                                                                          |

| Author, year, study name, country, WCRF Code | Study description | Time of diagnosis and follow-up | Disease characteristics treatment | Exposure assessment | Outcome (Events)                | Contrast                                   | RR (95% CI)        | Covariates |
|----------------------------------------------|-------------------|---------------------------------|-----------------------------------|---------------------|---------------------------------|--------------------------------------------|--------------------|------------|
|                                              |                   |                                 |                                   |                     | Breast cancer mortality (n=126) | Any/any vs. none/none (pre/post-diagnosis) | 0.55 (0.31 - 0.97) |            |

Abbreviations: LIBCSP, Long Island Breast Cancer Study Project; NHS, Nurses' Health Study

**Supplementary Table S12. Descriptive table of the included observational studies of post-diagnosis milk and dairy product intake and breast cancer prognosis**

| Publication , WCRF Code                                                                               | Study description                                                          | Time of diagnosis and follow-up                                                                                             | Disease characteristics treatment         | Exposure assessment                                                                 | Outcome (Events)                | Comparison                       | RR (95% CI)        | Covariates                                                                                                                                                       |                                                                                                                             |                  |
|-------------------------------------------------------------------------------------------------------|----------------------------------------------------------------------------|-----------------------------------------------------------------------------------------------------------------------------|-------------------------------------------|-------------------------------------------------------------------------------------|---------------------------------|----------------------------------|--------------------|------------------------------------------------------------------------------------------------------------------------------------------------------------------|-----------------------------------------------------------------------------------------------------------------------------|------------------|
| <b>Dairy Foods</b>                                                                                    |                                                                            |                                                                                                                             |                                           |                                                                                     |                                 |                                  |                    |                                                                                                                                                                  |                                                                                                                             |                  |
| Andersen <sup>38</sup><br>2020, DCH                                                                   | Population-based cohort study (n=977)<br>Mean age: 66 years                | Diagnosis year 1993 – 2013<br>Follow up = 7 years<br>175 total deaths, 121 breast cancer deaths, 152 recurrences            | ER positive 78%, negative 16%, missing 6% | FFQ, at baseline, 5 years after diagnosis                                           | All-cause mortality (n=175)     | Continuous per 200g/day increase | 0.99 (0.90-1.09)   | Age at diagnosis, year at diagnosis, time of follow-up since diagnosis, alcohol, smoking, physical activity, BMI, education tumour size, nodal status, ER status |                                                                                                                             |                  |
|                                                                                                       |                                                                            |                                                                                                                             |                                           |                                                                                     | Breast cancer mortality (n=121) |                                  | 0.99 (0.87-1.12)   |                                                                                                                                                                  |                                                                                                                             |                  |
|                                                                                                       |                                                                            |                                                                                                                             |                                           |                                                                                     | Recurrence (n=152)              |                                  | 0.93 (0.80-1.07)   |                                                                                                                                                                  |                                                                                                                             |                  |
|                                                                                                       |                                                                            |                                                                                                                             |                                           |                                                                                     | All-cause mortality (n=175)     | Pre- to post-diagnosis changes   | 0.97 (0.87-1.07)   |                                                                                                                                                                  | Age at diagnosis, year at diagnosis, time of follow-up since diagnosis, alcohol, smoking, physical activity, BMI, education |                  |
|                                                                                                       |                                                                            |                                                                                                                             |                                           |                                                                                     | Breast cancer mortality (n=121) |                                  | 200g/day           |                                                                                                                                                                  |                                                                                                                             | 0.99 (0.88-1.13) |
|                                                                                                       |                                                                            |                                                                                                                             |                                           |                                                                                     | Recurrence (n=152)              |                                  | 0.95 (0.82-1.10)   |                                                                                                                                                                  |                                                                                                                             |                  |
| Holmes <sup>39</sup> , 2017, NHS, United States<br><br>Superseded by Holmes 1999 for the linear dose- | Prospective cohort (n=6348)<br>Age range: 30-55<br>Pre- and postmenopausal | Diagnosis year: 1976 - 2004<br>Follow up= 16 years<br>1847 total deaths, 919 breast cancer deaths, 1046 distant recurrences | Stage: I to III                           | Validated semiquantitative FFQ (61 to 116 items), at least 12 months post-diagnosis | All-cause mortality (n=1847)    | Q5 vs. Q1                        | 1.01 (0.86 - 1.19) | Age at diagnosis, time since diagnosis, energy intake, BMI, weight change, age at first birth, parity, oral contraceptive use, menopausal status, hormone        |                                                                                                                             |                  |
|                                                                                                       |                                                                            |                                                                                                                             |                                           |                                                                                     | Breast cancer mortality (n=919) |                                  | P trend=0.46       |                                                                                                                                                                  |                                                                                                                             |                  |
|                                                                                                       |                                                                            |                                                                                                                             |                                           |                                                                                     |                                 | 1.01 (0.8 - 1.28)                | P trend=0.87       |                                                                                                                                                                  |                                                                                                                             |                  |



| Publication , WCRF Code                           | Study description                                                            | Time of diagnosis and follow-up                                                                              | Disease characteristics treatment                                                                            | Exposure assessment                                                                                                                                  | Outcome (Events)                    | Comparison               | RR (95% CI)                        | Covariates                                                                                                                                                                                                                                                                                                                  |
|---------------------------------------------------|------------------------------------------------------------------------------|--------------------------------------------------------------------------------------------------------------|--------------------------------------------------------------------------------------------------------------|------------------------------------------------------------------------------------------------------------------------------------------------------|-------------------------------------|--------------------------|------------------------------------|-----------------------------------------------------------------------------------------------------------------------------------------------------------------------------------------------------------------------------------------------------------------------------------------------------------------------------|
| response meta-analysis                            |                                                                              |                                                                                                              |                                                                                                              |                                                                                                                                                      | Distant recurrence (n=1046)         |                          | 0.91 (0.73 - 1.14)<br>P trend=0.45 | therapy use, aspirin use, alcohol, smoking, physical activity, tumour stage, radiation treatment, other treatment, calendar year                                                                                                                                                                                            |
| Kroenke <sup>41</sup> , 2013, LACE, United States | Prospective cohort (n=1893) Age range: 18-70 75% postmenopausal Mostly white | Diagnosis year: 2000-2002 Follow up = 11.8 years 349 recurrences, 372 total deaths, 189 breast cancer deaths | AJCC stage I-IIIa invasive breast cancer Completed breast cancer treatment, except adjuvant hormonal therapy | Validated semi-quantitative FFQ (120 items), baseline FFQ at 11-39 months and follow-up FFQ at 6 years post-diagnosis for diet in previous 12 months | All-cause mortality (n=372)         | ≥2.0 vs. <1 servings/day | 1.39 (1.02 - 1.90)<br>P trend=0.05 | Age at diagnosis, time from diagnosis to exposure assessment, age, race, education, tumour stage, tumour size, her-2/neu, nodal status, ER status, chemotherapy, radiotherapy, tamoxifen use, menopausal status, smoking, BMI, physical activity, energy intake, alcohol intake, fibre, fruit, comorbidity, red meat intake |
|                                                   |                                                                              |                                                                                                              |                                                                                                              |                                                                                                                                                      | Breast cancer mortality (n=189)     |                          | 1.26 (0.81 - 1.95)<br>P trend=0.32 |                                                                                                                                                                                                                                                                                                                             |
|                                                   |                                                                              |                                                                                                              |                                                                                                              |                                                                                                                                                      | Breast cancer recurrence (n=349)    |                          | 1.13 (0.83 - 1.54)<br>P trend=0.38 |                                                                                                                                                                                                                                                                                                                             |
|                                                   |                                                                              |                                                                                                              |                                                                                                              |                                                                                                                                                      | Non-breast cancer mortality (n=183) |                          | 1.54 (0.99 - 2.39)<br>P trend=0.07 |                                                                                                                                                                                                                                                                                                                             |

| Publication , WCRF Code                                                                                                             | Study description                                                                                                          | Time of diagnosis and follow-up                 | Disease characteristics treatment                                                                                                                      | Exposure assessment                                                        | Outcome (Events)                                                   | Comparison                   | RR (95% CI)                                                                         | Covariates                                                                                                                                                                                                                          |
|-------------------------------------------------------------------------------------------------------------------------------------|----------------------------------------------------------------------------------------------------------------------------|-------------------------------------------------|--------------------------------------------------------------------------------------------------------------------------------------------------------|----------------------------------------------------------------------------|--------------------------------------------------------------------|------------------------------|-------------------------------------------------------------------------------------|-------------------------------------------------------------------------------------------------------------------------------------------------------------------------------------------------------------------------------------|
| Beasley <sup>33</sup> , 2011, CWLS, United States                                                                                   | Follow up of cases of (population-based) case-control study (n=4441) Age range: 20-79 years, 73% Post-menopausal 99% White | Diagnosis year: 1998-2001 Follow up= 5.5 years  | Primary invasive breast cancer; Stages: 72.8% local, 27.2% regional, Surgery: 97.9%; Radiotherapy: 49.8%; Hormonal therapy: 57.8%; Chemotherapy: 31.9% | Validated FFQ (126 items), 1-16 years after diagnosis (42% within 5 years) | All-cause mortality (n=525)<br><br>Breast cancer mortality (n=137) | 4 vs. 0.7 servings/ day      | 1.18 (0.9 - 1.54)<br><br>P trend=0.27<br><br>0.94 (0.56 - 1.59)<br><br>P trend=0.99 | Age, residence, menopausal status, smoking, stage, alcohol intake, hormonal therapy, interval between diagnosis and baseline interview, BMI, physical activity, breast cancer treatment, energy intake                              |
| Holmes <sup>34</sup> MD, 1999, NHS, United States,<br><br>Superseded by Holmes <sup>39</sup> , 2017 for the high vs low forest plot | Population-based prospective cohort study (n= 1982) Pre- and postmenopausal Mean age: 54 years                             | Diagnosis year: 1976-1990 Follow up= 157 months | Invasive breast carcinoma 62% no lymph node metastases                                                                                                 | FFQ (up to 2 years after diagnosis)                                        | All- cause mortality (n=378)                                       | ≥2.15 vs. ≤0.92 servings/day | 0.72 (0.52 – 1.00)<br><br>P trend=0.04                                              | Age, time between exposure assessment and cancer diagnosis, year of diagnosis, oral contraceptive, hormonal therapy, smoking, age at first birth, nodal status, tumour size, BMI, menopausal status, energy intake, dietary factors |
| <b>High Fat Dairy</b>                                                                                                               |                                                                                                                            |                                                 |                                                                                                                                                        |                                                                            |                                                                    |                              |                                                                                     |                                                                                                                                                                                                                                     |

| Publication , WCRF Code                           | Study description                                                                      | Time of diagnosis and follow-up                     | Disease characteristics treatment                                                                            | Exposure assessment                                                                                          | Outcome (Events)                | Comparison                 | RR (95% CI)                          | Covariates                                                                                                                                                                                                                                                                                 |
|---------------------------------------------------|----------------------------------------------------------------------------------------|-----------------------------------------------------|--------------------------------------------------------------------------------------------------------------|--------------------------------------------------------------------------------------------------------------|---------------------------------|----------------------------|--------------------------------------|--------------------------------------------------------------------------------------------------------------------------------------------------------------------------------------------------------------------------------------------------------------------------------------------|
| Holmes <sup>39</sup> , 2017, NHS, United States   | Prospective cohort (n= 6348)<br>Age range: 30-55<br>Pre- and postmenopausal            | Diagnosis year: 1976 - 2004<br>Follow up= 16 years  | Stage: I to III                                                                                              | Validated semiquantitative FFQ (61 to 116 items), at least 12 months post-diagnosis                          | All-cause mortality (n=1847)    | 2.49 vs. 0.33 servings/day | 1.12 (0.96 - 1.31)<br>P trend=0.32   | Age at diagnosis, time since diagnosis, energy intake, BMI, weight change, age at first birth, parity, oral contraceptive use, menopausal status, hormone therapy use, aspirin use, alcohol, smoking, physical activity, tumour stage, radiation treatment, other treatment, calendar year |
|                                                   |                                                                                        |                                                     |                                                                                                              |                                                                                                              | Breast cancer mortality (n=919) |                            | 1.24 (0.98 - 1.56)<br>P trend=0.05   |                                                                                                                                                                                                                                                                                            |
|                                                   |                                                                                        |                                                     |                                                                                                              |                                                                                                              | Distant recurrence (n=1046)     |                            | 1.09 (0.88 - 1.35)<br>P trend=0.3    |                                                                                                                                                                                                                                                                                            |
| Kroenke <sup>41</sup> , 2013, LACE, United States | Prospective cohort (n= 1893)<br>Age range: 18-70<br>75% postmenopausal<br>Mostly white | Diagnosis year: 2000-2002<br>Follow up = 11.8 years | AJCC stage I-IIIa invasive breast cancer Completed breast cancer treatment, except adjuvant hormonal therapy | Validated semi-quantitative FFQ (120 items), baseline FFQ at 11-39 months and follow-up FFQ at 6 years post- | All-cause mortality (n=372)     | ≥1.0 vs. <0.5 servings/day | 1.64 (1.24 - 2.17)<br>P trends≤0.001 | Age at diagnosis, time from diagnosis to exposure assessment, race, education, tumour stage, tumour size, her-2/neu, nodal status, ER status, chemotherapy, radiotherapy,                                                                                                                  |
|                                                   |                                                                                        |                                                     |                                                                                                              |                                                                                                              | Breast cancer mortality (n=189) |                            | 1.49 (1.00 - 2.24)<br>P trend=0.05   |                                                                                                                                                                                                                                                                                            |

| Publication , WCRF Code                         | Study description                                                           | Time of diagnosis and follow-up                    | Disease characteristics treatment | Exposure assessment                                                                | Outcome (Events)                    | Comparison                 | RR (95% CI)                         | Covariates                                                                                                                                                                                                                                                                                 |
|-------------------------------------------------|-----------------------------------------------------------------------------|----------------------------------------------------|-----------------------------------|------------------------------------------------------------------------------------|-------------------------------------|----------------------------|-------------------------------------|--------------------------------------------------------------------------------------------------------------------------------------------------------------------------------------------------------------------------------------------------------------------------------------------|
|                                                 |                                                                             |                                                    |                                   | diagnosis for diet in previous 12 months                                           | Breast cancer recurrence (n=349)    |                            | 1.22 (0.91 - 1.65)<br>P trend=0.18  | tamoxifen use, menopausal status, smoking, BMI, physical activity, energy intake, alcohol intake, fibre, fruit, comorbidity, red meat intake, low-fat dairy                                                                                                                                |
|                                                 |                                                                             |                                                    |                                   |                                                                                    | Non-breast cancer mortality (n=183) |                            | 1.67 (1.13 – 2.47)<br>P trend=0.007 |                                                                                                                                                                                                                                                                                            |
| <b>Low Fat Dairy</b>                            |                                                                             |                                                    |                                   |                                                                                    |                                     |                            |                                     |                                                                                                                                                                                                                                                                                            |
| Holmes <sup>39</sup> , 2017, NHS, United States | Prospective cohort (n= 6348)<br>Age range: 30-55<br>Pre- and postmenopausal | Diagnosis year: 1976 - 2004<br>Follow up= 16 years | Stage: I to III                   | Validated semiquantitative FFQ (61 to 116 items) at least 12 months post-diagnosis | All-cause mortality (n=1847)        | 2.15 vs. 0.14 servings/day | 0.92 (0.79 - 1.07)<br>P trend=0.1   | Age at diagnosis, time since diagnosis, energy intake, BMI, weight change, age at first birth, parity, oral contraceptive use, menopausal status, hormone therapy use, aspirin use, alcohol, smoking, physical activity, tumour stage, radiation treatment, other treatment, calendar year |
|                                                 |                                                                             |                                                    |                                   |                                                                                    | Breast cancer mortality (n=919)     |                            | 0.83 (0.67 - 1.04)<br>P trend=0.03  |                                                                                                                                                                                                                                                                                            |
|                                                 |                                                                             |                                                    |                                   |                                                                                    | Distant recurrence (n=1046)         |                            | 0.84 (0.69 - 1.04)<br>P trend=0.04  |                                                                                                                                                                                                                                                                                            |

| Publication , WCRF Code                           | Study description                                                             | Time of diagnosis and follow-up                  | Disease characteristics treatment                                                                            | Exposure assessment                                                                                                                                  | Outcome (Events)                    | Comparison                 | RR (95% CI)                        | Covariates                                                                                                                                                                                                                                                                                                                             |
|---------------------------------------------------|-------------------------------------------------------------------------------|--------------------------------------------------|--------------------------------------------------------------------------------------------------------------|------------------------------------------------------------------------------------------------------------------------------------------------------|-------------------------------------|----------------------------|------------------------------------|----------------------------------------------------------------------------------------------------------------------------------------------------------------------------------------------------------------------------------------------------------------------------------------------------------------------------------------|
| Kroenke <sup>41</sup> , 2013, LACE, United States | Prospective cohort (n= 1893) Age range: 18-70 75% postmenopausal Mostly white | Diagnosis year: 2000-2002 Follow up = 11.8 years | AJCC stage I-IIIa invasive breast cancer Completed breast cancer treatment, except adjuvant hormonal therapy | Validated semi-quantitative FFQ (120 items), baseline FFQ at 11-39 months and follow-up FFQ at 6 years post-diagnosis for diet in previous 12 months | All- cause mortality (n=372)        | ≥1.0 vs. <0.5 servings/day | 1.05 (0.80 - 1.36)<br>P trend=0.76 | Age at diagnosis, time from diagnosis to exposure assessment, race, education, tumour stage, tumour size, Her-2/neu, nodal status, ER status, chemotherapy, radiotherapy, tamoxifen use, menopausal status, smoking, BMI, physical activity, energy intake, alcohol intake, fibre, fruit, comorbidity, red meat intake, high-fat dairy |
|                                                   |                                                                               |                                                  |                                                                                                              |                                                                                                                                                      | Breast cancer mortality (n=189)     |                            | 1.03 (0.71 - 1.49)<br>P trend=0.89 |                                                                                                                                                                                                                                                                                                                                        |
|                                                   |                                                                               |                                                  |                                                                                                              |                                                                                                                                                      | Breast cancer recurrence (n=349)    |                            | 1.01 (0.78 - 1.32)<br>P trend=0.85 |                                                                                                                                                                                                                                                                                                                                        |
|                                                   |                                                                               |                                                  |                                                                                                              |                                                                                                                                                      | Non-breast cancer mortality (n=183) |                            | 1.05 (0.71 - 1.55)<br>P trend=0.83 |                                                                                                                                                                                                                                                                                                                                        |

Abbreviations: CWLS, Collaborative Women's Longevity Study; DCH, Diet, Cancer and Health cohort; LACE, Life After Cancer Epidemiology; NHS, Nurses' Health Study

**Supplementary Table S13. Descriptive table of the included observational studies of post-diagnosis soy and isoflavone intake and breast cancer prognosis**

| Author, year, study name, country, WCRF Code           | Study description                                                                                                                                      | Time of diagnosis and follow-up                                 | Disease characteristics treatment                                                                                                                                                                                                                                                                                                                                    | Exposure assessment                                                                                                                                                                                                                                   | Outcome (Events)                                                                                                                                                                                                                                                                                                                                                                      | Contrast                   | RR (95% CI)                                                                                                                                                                                          | Covariates                                                                                                                                                                                         |
|--------------------------------------------------------|--------------------------------------------------------------------------------------------------------------------------------------------------------|-----------------------------------------------------------------|----------------------------------------------------------------------------------------------------------------------------------------------------------------------------------------------------------------------------------------------------------------------------------------------------------------------------------------------------------------------|-------------------------------------------------------------------------------------------------------------------------------------------------------------------------------------------------------------------------------------------------------|---------------------------------------------------------------------------------------------------------------------------------------------------------------------------------------------------------------------------------------------------------------------------------------------------------------------------------------------------------------------------------------|----------------------------|------------------------------------------------------------------------------------------------------------------------------------------------------------------------------------------------------|----------------------------------------------------------------------------------------------------------------------------------------------------------------------------------------------------|
| <b>Isoflavones</b>                                     |                                                                                                                                                        |                                                                 |                                                                                                                                                                                                                                                                                                                                                                      |                                                                                                                                                                                                                                                       |                                                                                                                                                                                                                                                                                                                                                                                       |                            |                                                                                                                                                                                                      |                                                                                                                                                                                                    |
| Zhang <sup>42</sup><br>FF,<br>2017(a),<br>BCFR,<br>USA | Follow-up study of cancer survivors cohort (n= 6235 of which n= 1466 reported the exposure post-diagnosis) pre- and postmenopausal mean age:51.8 years | Recruitment period: 1996-2011, follow up= 9.4 years 1224 deaths | First primary invasive breast cancer 52.3% ER+, 22.4% ER-, 1.9% unclassified, 23.4% unknown; 47.1% PR+, 26.9% PR-, 1.8% unclassified, 24.2% unknown ER+ 52.3%, ER- 22.4%, undetermined 1.9%, missing/unknown 23.4% PR+ 47.1%, PR- 26.9%, undetermined 1.8%, missing/unknown 24.2%; 86.3% surgery, 58.3% radiation therapy, 52.5% chemotherapy, 45.9% hormone therapy | Self-administered FFQ about usual dietary intake of 108 food items. Validity was assessed against repeated 24-hour recalls and women reporting untrue intakes were excluded, 1,466 women reported their dietary intake within 5 years after diagnosis | All-cause mortality (n=261) only women who reported post-diagnosis diet<br>All-cause mortality pre-menopausal (n=3056)<br>All-cause mortality post-menopausal (n=3176)<br>All-cause mortality normal weight (<25 kg/m <sup>2</sup> ) (n=2991)<br>All-cause mortality overweight (25-29.9 kg/m <sup>2</sup> ) (n=1723)<br>All-cause mortality obese (≥ 30 kg/m <sup>2</sup> ) (n=1336) | ≥ 1.494 vs. < 0.342 mg/day | 0.65 (0.41 – 1.00) P trend=0.02<br>0.93 (0.68-1.27) P trend=0.46<br>0.78 (0.59-1.05) P trend=0.09<br>0.74 (0.54-1.01) P trend=0.05<br>0.97 (0.66-1.41) P trend=0.75<br>0.76 (0.48-1.19) P trend=0.13 | Age, study site, total caloric intake, race/ethnicity, education, total intake, healthy eating index, treatment type, recreational physical activity, BMI, alcohol use, smoking status, pack years |

| Author, year, study name, country, WCRF Code                             | Study description                                                                 | Time of diagnosis and follow-up                                                          | Disease characteristics treatment | Exposure assessment                                                                  | Outcome (Events)                                              | Contrast                | RR (95% CI)                       | Covariates                                                                            |
|--------------------------------------------------------------------------|-----------------------------------------------------------------------------------|------------------------------------------------------------------------------------------|-----------------------------------|--------------------------------------------------------------------------------------|---------------------------------------------------------------|-------------------------|-----------------------------------|---------------------------------------------------------------------------------------|
|                                                                          |                                                                                   |                                                                                          |                                   |                                                                                      | All-cause mortality ER+PR+, ER+PR-ER-PR+ (N=3348)             |                         | 0.90 (0.69-1.19)<br>P trend=0.41  |                                                                                       |
|                                                                          |                                                                                   |                                                                                          |                                   |                                                                                      | All-cause mortality ER-PR- (n=1167)                           |                         | 0.49 (0.29-0.83)<br>P trend=0.005 |                                                                                       |
|                                                                          |                                                                                   |                                                                                          |                                   |                                                                                      | All-cause mortality received hormone therapy (n=2862)         |                         | 0.90 (0.66-1.22)<br>P trend=0.19  |                                                                                       |
|                                                                          |                                                                                   |                                                                                          |                                   |                                                                                      | All-cause mortality did not received hormone therapy (n=3373) |                         | 0.68 (0.51-0.91)<br>P trend=0.02  |                                                                                       |
| Nechuta <sup>43</sup> SJ, 2012, ABCPP (LACE, WHEL, SBCSS), USA and China | Follow-up of prospective cohort studies in the pooling project (n= 9514) pre- and | Diagnosed: 1991 and 2006 Follow up= 7.4 years n= 1171 deaths (881 from breast cancer) n= | Invasive breast cancer            | Soy food intake was assessed with a validated FFQ. Soy food intake assessed within a | All-cause mortality (n=1171)                                  | ≥ 10.0 vs. < 4.0 mg/day | 0.87 (0.70 - 1.07)                | Age at diagnosis, oestrogen receptor status, progesterone receptor status, TNM stage, |
|                                                                          |                                                                                   |                                                                                          |                                   |                                                                                      | All-cause mortality (n=419) premenopausal                     |                         | 1.11 (0.77-1.60)<br>P trend=0.59  |                                                                                       |
|                                                                          |                                                                                   |                                                                                          |                                   |                                                                                      | All-cause                                                     |                         | 0.84                              |                                                                                       |

| Author, year, study name, country, WCRF Code | Study description | Time of diagnosis and follow-up | Disease characteristics treatment | Exposure assessment                                                                                                                                                                  | Outcome (Events)                                                                                                                                                                                                                                                                                                                                                                         | Contrast | RR (95% CI)                                                                                                                                                                                                                               | Covariates                                                                                                                                                       |
|----------------------------------------------|-------------------|---------------------------------|-----------------------------------|--------------------------------------------------------------------------------------------------------------------------------------------------------------------------------------|------------------------------------------------------------------------------------------------------------------------------------------------------------------------------------------------------------------------------------------------------------------------------------------------------------------------------------------------------------------------------------------|----------|-------------------------------------------------------------------------------------------------------------------------------------------------------------------------------------------------------------------------------------------|------------------------------------------------------------------------------------------------------------------------------------------------------------------|
|                                              | postmenopausal    | 1348 recurrences                |                                   | mean of 2 years after diagnosis<br>Participants completed a baseline FFQ, multiple 24-h recalls twice per month consecutively for 12 months and a second FFQ at the end of the study | mortality (n=706) postmenopausal<br>All-cause mortality ER-positive<br>All-cause mortality ER-negative<br>All-cause mortality among ER-positive tamoxifen use<br>All-cause mortality among ER-positive no tamoxifen use<br>Breast cancer-specific mortality (n=881)<br>Breast cancer-specific mortality (n=382) premenopausal<br>Breast cancer-specific mortality (n=467) postmenopausal |          | (0.61 -1.14)<br>P trend=0.26<br>0.91 (0.69-1.20)<br>P trend=0.54<br>0.81 (0.54-1.23)<br>P trend=<0.01<br>0.74 (0.52-1.07)<br>0.98 (0.65-1.47)<br>0.83 (0.64-1.07)<br>0.97 (0.66-1.43)<br>P trend=0.59<br>0.78 (0.54-1.14)<br>P trend=0.16 | chemotherapy, radiotherapy, hormonal therapy, smoking, BMI, exercise, cruciferous vegetables intake, parity, menopausal status, study, race/ethnicity, education |



| Author, year, study name, country, WCRF Code | Study description | Time of diagnosis and follow-up | Disease characteristics treatment | Exposure assessment | Outcome (Events)                                              | Contrast | RR (95% CI)                              | Covariates |
|----------------------------------------------|-------------------|---------------------------------|-----------------------------------|---------------------|---------------------------------------------------------------|----------|------------------------------------------|------------|
|                                              |                   |                                 |                                   |                     | Breast cancer-specific mortality ER-positive                  |          | 0.93<br>(0.67-1.28)<br>P<br>trend=0.69   |            |
|                                              |                   |                                 |                                   |                     | Breast cancer-specific mortality ER-negative                  |          | 0.67<br>(0.43-1.05)<br>P<br>trend=0.07   |            |
|                                              |                   |                                 |                                   |                     | Breast cancer-specific mortality ER-positive tamoxifen use    |          | 0.84<br>(0.54-1.31)                      |            |
|                                              |                   |                                 |                                   |                     | Breast cancer-specific mortality ER-positive no tamoxifen use |          | 1.16<br>(0.71-1.90)                      |            |
|                                              |                   |                                 |                                   |                     | Breast cancer recurrence (n=1348)                             |          | 0.75<br>(0.61-0.92)                      |            |
|                                              |                   |                                 |                                   |                     | Breast cancer recurrence (n=589) premenopausal                |          | 0.93<br>(0.69-1.26)<br>P<br>trend=0.64   |            |
|                                              |                   |                                 |                                   |                     | Breast cancer recurrence (n=695) postmenopausal               |          | 0.64<br>(0.48-0.87)<br>P trend=<br><0.01 |            |
|                                              |                   |                                 |                                   |                     | Breast cancer recurrence ER-positive                          |          | 0.81<br>(0.63-1.04)<br>P<br>trend=0.11   |            |

| Author, year, study name, country, WCRF Code | Study description                                                                                            | Time of diagnosis and follow-up                                                                                                            | Disease characteristics treatment                                                                                                              | Exposure assessment                                                                                                                                                    | Outcome (Events)                                      | Contrast                | RR (95% CI)                      | Covariates                                                                                                    |
|----------------------------------------------|--------------------------------------------------------------------------------------------------------------|--------------------------------------------------------------------------------------------------------------------------------------------|------------------------------------------------------------------------------------------------------------------------------------------------|------------------------------------------------------------------------------------------------------------------------------------------------------------------------|-------------------------------------------------------|-------------------------|----------------------------------|---------------------------------------------------------------------------------------------------------------|
|                                              |                                                                                                              |                                                                                                                                            |                                                                                                                                                |                                                                                                                                                                        | Breast cancer recurrence ER-negative                  |                         | 0.64 (0.44-0.94)<br>P trend=0.02 |                                                                                                               |
|                                              |                                                                                                              |                                                                                                                                            |                                                                                                                                                |                                                                                                                                                                        | Breast cancer recurrence ER-positive tamoxifen use    |                         | 0.63 (0.46-0.87)                 |                                                                                                               |
|                                              |                                                                                                              |                                                                                                                                            |                                                                                                                                                |                                                                                                                                                                        | Breast cancer recurrence ER-positive no tamoxifen use |                         | 0.79 (0.55-1.14)                 |                                                                                                               |
| Zhang <sup>44</sup> Y, 2012, China           | Prospective study of breast cancer patients (n=616) Pre-, post- or perimenopausal, mean age 45.7 ± 6.2 years | Recruitment period: 2004-2006, follow up= 52.1 months (range: 9-60 months), until 2011, 79 total deaths, 9 subjects were lost to follow up | 61.4% ER+,38.6% ER-, 81.3% stage I-II, 18.7% stage III-IV chemotherapy: 86.7%; radiotherapy: 64.9%; hormone therapy:7.6%; tamoxifen use: 56.8% | Soy food intake was assessed by a quantitative FFQ (median 69 days post-diagnosis). Soy food intake was estimated based on the intake of six foods or food groups. Soy | <b>Soy Protein</b>                                    |                         |                                  | Age, education, smoking, alcohol intake, family history, tamoxifen use, TNM stage, chemotherapy, radiotherapy |
|                                              |                                                                                                              |                                                                                                                                            |                                                                                                                                                |                                                                                                                                                                        | Total mortality                                       | >13.03 vs. < 2.12 g/day | 0.71 (0.52-0.98)                 |                                                                                                               |
|                                              |                                                                                                              |                                                                                                                                            |                                                                                                                                                |                                                                                                                                                                        | Total mortality ER-positive                           |                         | 0.66 (0.44-0.93)                 |                                                                                                               |
|                                              |                                                                                                              |                                                                                                                                            |                                                                                                                                                |                                                                                                                                                                        | Total mortality ER-negative                           |                         | 0.77 (0.53-1.00)                 |                                                                                                               |
|                                              |                                                                                                              |                                                                                                                                            |                                                                                                                                                |                                                                                                                                                                        | <b>Isoflavone</b>                                     |                         |                                  |                                                                                                               |
|                                              |                                                                                                              |                                                                                                                                            |                                                                                                                                                |                                                                                                                                                                        | Total mortality                                       | >28.83 vs. <7.56 mg/day | 0.62 (0.42 - 0.9)                |                                                                                                               |

| Author, year, study name, country, WCRF Code                                                        | Study description                                                                                                                           | Time of diagnosis and follow-up                                    | Disease characteristics treatment                                                                                                                           | Exposure assessment                                                                                                                                                                        | Outcome (Events)                                                                                                                                                       | Contrast                     | RR (95% CI)                                                         | Covariates                                                                                                                                                                                       |
|-----------------------------------------------------------------------------------------------------|---------------------------------------------------------------------------------------------------------------------------------------------|--------------------------------------------------------------------|-------------------------------------------------------------------------------------------------------------------------------------------------------------|--------------------------------------------------------------------------------------------------------------------------------------------------------------------------------------------|------------------------------------------------------------------------------------------------------------------------------------------------------------------------|------------------------------|---------------------------------------------------------------------|--------------------------------------------------------------------------------------------------------------------------------------------------------------------------------------------------|
|                                                                                                     |                                                                                                                                             |                                                                    |                                                                                                                                                             | isoflavones was defined as the sum of three individual isoflavones: daidzein, genistein and glycitein                                                                                      | Total mortality ER-positive                                                                                                                                            |                              | 0.59 (0.40-0.93)                                                    |                                                                                                                                                                                                  |
|                                                                                                     |                                                                                                                                             |                                                                    |                                                                                                                                                             |                                                                                                                                                                                            | Total mortality ER-negative                                                                                                                                            |                              | 0.78 (0.47-0.98)                                                    |                                                                                                                                                                                                  |
| Caan <sup>45</sup> B, 2011, WHEL, United States<br><br>(superseded by Nechuta <sup>43</sup> , 2012) | Randomised controlled trial of dietary intervention trial, ancillary analysis (n=2736) age range: 18-70 years Pre-, post- or perimenopausal | Diagnosed: 1991-2000; follow up= 7.3 years, until 2006, 271 deaths | Early stage breast cancer, 79.7% ER+ or PR+, 20.3% ER-/PR-, AJCC stages: 38.9% I, 45.8% II, 15.3% III Tamoxifen: 60.8% current, 32.7% never, 6.4% past user | FFQ, soy intake was measured at study entry post-diagnosis (median 2 years, range: 2 months to 4 years) using the Arizona Food Frequency Questionnaire (AFFQ) a 153-item semi quantitative | <b>Isoflavone</b><br>Overall (n=271)<br><br>Additional breast cancer events (n=448) (* includes an invasive breast cancer recurrence or a new invasive primary cancer) | 16.33-86.9 vs. 0-0.07 mg/day | 0.46 (0.2 - 1.05) P trend=0.02<br><br>0.78 (0.46-1.31) P trend=0.47 | Stage, grade, ER/PR status, menopausal status, chemotherapy treatment, radiation, age, education, race, soy supplement intervention group, presence of hot flash symptoms and their interaction, |

| Author, year, study name, country, WCRF Code                                   | Study description                                               | Time of diagnosis and follow-up                                                                                                                                                  | Disease characteristics treatment                   | Exposure assessment                                                                                                                                                 | Outcome (Events)                                 | Contrast                 | RR (95% CI)      | Covariates                                                                                                                                |
|--------------------------------------------------------------------------------|-----------------------------------------------------------------|----------------------------------------------------------------------------------------------------------------------------------------------------------------------------------|-----------------------------------------------------|---------------------------------------------------------------------------------------------------------------------------------------------------------------------|--------------------------------------------------|--------------------------|------------------|-------------------------------------------------------------------------------------------------------------------------------------------|
|                                                                                |                                                                 |                                                                                                                                                                                  |                                                     | questionnaire                                                                                                                                                       |                                                  |                          |                  | tamoxifen use                                                                                                                             |
| Guha <sup>46</sup> N, 2009, LACE, United States, (superseded by Nechuta, 2012) | (n= 1954) age range: 18-79 years, pre- and postmenopausal women | Recruitment period: between January 2000 and April 2002, follow up= 6.31 years, until 2008, 282 breast cancer recurrences, mean time from enrolment to recurrence was 3.31 years | Primary breast cancer within 39 months of enrolment | A Fred Hutchinson Cancer Research Center (FHCRC) semi-quantitative FFQ with > 100 foods and beverages and a separate soy FFQ with 14 items, assessed post diagnosis | <b>Daidzein</b>                                  | ≥ 9,596.55 vs. 0 µg/day  |                  | Age, race, soy supplement use, BMI 1 year before diagnosis, menopausal status, tobacco pack-years, tumour stage, ER status, Energy intake |
|                                                                                |                                                                 |                                                                                                                                                                                  |                                                     |                                                                                                                                                                     | Breast cancer recurrence (n=266)                 |                          | 0.96 (0.52-1.76) |                                                                                                                                           |
|                                                                                |                                                                 |                                                                                                                                                                                  |                                                     |                                                                                                                                                                     | Breast cancer recurrence (n=54) pre-menopausal   |                          | 1.74 (0.63-4.76) |                                                                                                                                           |
|                                                                                |                                                                 |                                                                                                                                                                                  |                                                     |                                                                                                                                                                     | Breast cancer recurrence (n=171) post-menopausal | 0.7 (0.27-1.77)          |                  |                                                                                                                                           |
|                                                                                |                                                                 |                                                                                                                                                                                  |                                                     |                                                                                                                                                                     | <b>Genistein</b>                                 | ≥ 13,025.88 vs. 0 µg/day |                  |                                                                                                                                           |
|                                                                                |                                                                 |                                                                                                                                                                                  |                                                     |                                                                                                                                                                     | Breast cancer recurrence (n=266)                 |                          | 0.95 (0.52-1.75) |                                                                                                                                           |
| Breast cancer recurrence (n=54) pre-menopausal                                 | 1.75 (0.65-4.76)                                                |                                                                                                                                                                                  |                                                     |                                                                                                                                                                     |                                                  |                          |                  |                                                                                                                                           |

| Author, year, study name, country, WCRF Code                                               | Study description                                                                                      | Time of diagnosis and follow-up                                                                                        | Disease characteristics treatment                                                                                                                                                             | Exposure assessment                                                                                                                   | Outcome (Events)                                                                                                                                                                                             | Contrast              | RR (95% CI)                                                               | Covariates                                                                                                                |
|--------------------------------------------------------------------------------------------|--------------------------------------------------------------------------------------------------------|------------------------------------------------------------------------------------------------------------------------|-----------------------------------------------------------------------------------------------------------------------------------------------------------------------------------------------|---------------------------------------------------------------------------------------------------------------------------------------|--------------------------------------------------------------------------------------------------------------------------------------------------------------------------------------------------------------|-----------------------|---------------------------------------------------------------------------|---------------------------------------------------------------------------------------------------------------------------|
|                                                                                            |                                                                                                        |                                                                                                                        |                                                                                                                                                                                               | (Assessed on average 23 months post diagnosis but intake referred to the 12 months prior diagnosis)                                   | Breast cancer recurrence (n=171) post-menopausal<br><b>Glycetin</b><br>Breast cancer recurrence (n=266)<br>Breast cancer recurrence (n=54) pre-menopausal<br>Breast cancer recurrence (n=54) post-menopausal | ≥ 795.40 vs. 0 µg/day | 0.69 (0.27-1.75)<br>0.8 (0.42-1.5)<br>1.6 (0.54-4.72)<br>0.51 (0.18-1.38) |                                                                                                                           |
| Shu <sup>47</sup> , 2009, SBCSS, China<br><br>(superseded by Nechuta <sup>43</sup> , 2012) | Prospective cohort of breast cancer survivors (n= 5042) pre- and postmenopausal age range: 20-75 years | Diagnosed: 2002-2006, follow up= 3.9 years, until 2008, 444 deaths and 534 recurrences or breast cancer-related deaths | Primary breast cancer, 63.2% ER+, 35.2% ER-; 57.5% PR+, 40.6% PR-, TNM stages: 85.8% 0-II, 9.8% III-IV, radical mastectomy: 92.6%; radiotherapy: 32.1%; chemotherapy: 91.2%; tamoxifen: 52.1% | 6.5 months after diagnosis<br>Habitual dietary intake was assessed using a validated FFQ over the preceding 6 months for the baseline | <b>Isoflavone</b><br>Total mortality (n=444) (Result superseded by Nechuta, 2012, SBR00559)<br>Total mortality (n=186) premenopausal<br>Total mortality (n=258) postmenopausal                               | >62.68 vs. ≤20 mg/day | 0.79 (0.61-1.03)<br>0.78 (0.52-1.16)<br>0.81 (0.57-1.16)                  | Age at diagnosis, TNM stage, chemotherapy, radiotherapy, surgery type, BMI, menopausal status, receptor status, tamoxifen |

| Author, year, study name, country, WCRF Code | Study description | Time of diagnosis and follow-up | Disease characteristics treatment                                                        | Exposure assessment                                                                           | Outcome (Events)                                                                         | Contrast            | RR (95% CI)         | Covariates                                                                                                       |
|----------------------------------------------|-------------------|---------------------------------|------------------------------------------------------------------------------------------|-----------------------------------------------------------------------------------------------|------------------------------------------------------------------------------------------|---------------------|---------------------|------------------------------------------------------------------------------------------------------------------|
|                                              |                   |                                 |                                                                                          | survey, 12 months for the 18-month survey and the preceding 18 months for the 36-month survey | Total mortality (n=202)<br>ER-positive<br>(Result superseded by Nechuta, 2012, SBR00559) |                     | 0.78<br>(0.53-1.16) | use, education, income, cruciferous vegetables, meat intake, supplements use, tea consumption, physical activity |
|                                              |                   |                                 | Total mortality (n=224)<br>ER-negative<br>(Result superseded by Nechuta, 2012, SBR00559) |                                                                                               |                                                                                          | 0.85<br>(0.58-1.24) |                     |                                                                                                                  |
|                                              |                   |                                 | Total mortality (n=427)<br>Stage 0-IV                                                    |                                                                                               |                                                                                          | 0.81<br>(0.62-1.06) |                     |                                                                                                                  |
|                                              |                   |                                 | Total mortality (n=56)<br>Stage 0 and I                                                  |                                                                                               |                                                                                          | 0.96<br>(0.44-2.10) |                     |                                                                                                                  |
|                                              |                   |                                 | Total mortality (n=224)<br>Stage II                                                      |                                                                                               |                                                                                          | 1.02<br>(0.69-1.49) |                     |                                                                                                                  |
|                                              |                   |                                 | Total mortality (n=147)<br>Stage III and IV                                              |                                                                                               |                                                                                          | 0.54 (0.34-0.87)    |                     |                                                                                                                  |
|                                              |                   |                                 | Total mortality (n=125)<br>Tamoxifen use                                                 |                                                                                               |                                                                                          | 0.74<br>(0.42-1.29) |                     |                                                                                                                  |
|                                              |                   |                                 | Total mortality (n=76)                                                                   |                                                                                               |                                                                                          | 0.74<br>(0.38-1.43) |                     |                                                                                                                  |

| Author, year, study name, country, WCRF Code | Study description | Time of diagnosis and follow-up | Disease characteristics treatment | Exposure assessment | Outcome (Events)                                                                                                                     | Contrast | RR (95% CI)        | Covariates |
|----------------------------------------------|-------------------|---------------------------------|-----------------------------------|---------------------|--------------------------------------------------------------------------------------------------------------------------------------|----------|--------------------|------------|
|                                              |                   |                                 |                                   |                     | No tamoxifen use                                                                                                                     |          |                    |            |
|                                              |                   |                                 |                                   |                     | Additional breast cancer events (recurrence/breast cancer mortality combined) (n=534) (Result superseded by Nechuta, 2012, SBR00559) |          | 0.77 (0.60 - 0.98) |            |
|                                              |                   |                                 |                                   |                     | Additional breast cancer events (recurrence/breast cancer mortality combined) (n=242) premenopausal                                  |          | 0.77 (0.55-1.09)   |            |
|                                              |                   |                                 |                                   |                     | Additional breast cancer events (recurrence/breast cancer mortality combined) (n=292) postmenopausal                                 |          | 0.78 (0.55-1.08)   |            |
|                                              |                   |                                 |                                   |                     | Additional breast cancer events                                                                                                      |          | 0.77 (0.54-1.09)   |            |

| Author, year, study name, country, WCRF Code | Study description | Time of diagnosis and follow-up | Disease characteristics treatment | Exposure assessment | Outcome (Events)                                                                                                                                 | Contrast | RR (95% CI)      | Covariates |
|----------------------------------------------|-------------------|---------------------------------|-----------------------------------|---------------------|--------------------------------------------------------------------------------------------------------------------------------------------------|----------|------------------|------------|
|                                              |                   |                                 |                                   |                     | (recurrence/breast cancer mortality combined) (n=255) (Result superseded by Nechuta, 2012, SBR00559) ER-positive                                 |          |                  |            |
|                                              |                   |                                 |                                   |                     | Additional breast cancer events (recurrence/breast cancer mortality combined) (n=267) (Result superseded by Nechuta, 2012, SBR00559) ER-negative |          | 0.88 (0.62-1.25) |            |
|                                              |                   |                                 |                                   |                     | Additional breast cancer events (recurrence/breast cancer mortality combined) (n=517) Stage 0-IV                                                 |          | 0.78 (0.61-0.99) |            |



| Author, year, study name, country, WCRF Code | Study description | Time of diagnosis and follow-up | Disease characteristics treatment | Exposure assessment | Outcome (Events)                                                                                   | Contrast | RR (95% CI)      | Covariates |
|----------------------------------------------|-------------------|---------------------------------|-----------------------------------|---------------------|----------------------------------------------------------------------------------------------------|----------|------------------|------------|
|                                              |                   |                                 |                                   |                     | Additional breast cancer events (recurrence/breast cancer mortality combined) (n=71) Stage 0 and I |          | 0.84 (0.43-1.67) |            |
|                                              |                   |                                 |                                   |                     | Additional breast cancer events (recurrence/breast cancer mortality combined) (n=277) Stage II     |          | 0.77 (0.55-1.09) |            |
|                                              |                   |                                 |                                   |                     | Additional breast cancer events (recurrence/breast cancer mortality combined) (n=169) Stage III-IV |          | 0.75 (0.49-1.15) |            |
|                                              |                   |                                 |                                   |                     | Additional breast cancer events (recurrence/breast cancer mortality combined) (n=158)              |          | 0.73 (0.44-1.19) |            |

| Author, year, study name, country, WCRF Code | Study description | Time of diagnosis and follow-up | Disease characteristics treatment | Exposure assessment | Outcome (Events)                                                                     | Contrast    | RR (95% CI)      | Covariates |
|----------------------------------------------|-------------------|---------------------------------|-----------------------------------|---------------------|--------------------------------------------------------------------------------------|-------------|------------------|------------|
|                                              |                   |                                 |                                   |                     | Tamoxifen use                                                                        |             |                  |            |
|                                              |                   |                                 |                                   |                     | Additional breast cancer events (recurrence/breast cancer mortality combined) (n=96) |             | 0.71 (0.39-1.28) |            |
|                                              |                   |                                 |                                   |                     | No tamoxifen use                                                                     |             |                  |            |
|                                              |                   |                                 |                                   |                     | <b>Soy protein</b>                                                                   |             |                  |            |
|                                              |                   |                                 |                                   |                     | Total mortality (n= 444)                                                             | > 15.31 vs. | 0.71 (0.54-0.92) |            |
|                                              |                   |                                 |                                   |                     | Total mortality (n=186) premenopausal                                                | ≤5.31 g/day | 0.69 (0.46-1.04) |            |
|                                              |                   |                                 |                                   |                     | Total mortality (n=258) postmenopausal                                               |             | 0.72 (0.51-1.03) |            |
|                                              |                   |                                 |                                   |                     | Total mortality (n=202) ER-positive                                                  |             | 0.67 (0.45-1.00) |            |
|                                              |                   |                                 |                                   |                     | Total mortality (n=224) ER-negative                                                  |             | 0.78 (0.54-1.14) |            |
|                                              |                   |                                 |                                   |                     | Total mortality (n=427) Stage 0-IV                                                   |             | 0.73 (0.56-0.96) |            |
|                                              |                   |                                 |                                   |                     | Total mortality (n=56) Stage 0 and I                                                 |             | 0.78 (0.37-1.65) |            |

| Author, year, study name, country, WCRF Code | Study description | Time of diagnosis and follow-up | Disease characteristics treatment | Exposure assessment | Outcome (Events)                                                                                       | Contrast | RR (95% CI)         | Covariates |
|----------------------------------------------|-------------------|---------------------------------|-----------------------------------|---------------------|--------------------------------------------------------------------------------------------------------|----------|---------------------|------------|
|                                              |                   |                                 |                                   |                     | Total mortality (n=224)<br>Stage II                                                                    |          | 0.97<br>(0.65-1.45) |            |
|                                              |                   |                                 |                                   |                     | Total mortality (n=147)<br>Stage III and IV                                                            |          | 0.48<br>(0.31-0.76) |            |
|                                              |                   |                                 |                                   |                     | Total mortality (n=125)<br>Tamoxifen use                                                               |          | 0.61<br>(0.34-1.08) |            |
|                                              |                   |                                 |                                   |                     | Total mortality (n=76)<br>No tamoxifen use                                                             |          | 0.65<br>(0.33-1.29) |            |
|                                              |                   |                                 |                                   |                     | Additional breast cancer events (recurrence/breast cancer mortality combined) (n= 534)                 |          | 0.68<br>(0.54-0.87) |            |
|                                              |                   |                                 |                                   |                     | Additional breast cancer events (recurrence/breast cancer mortality combined) (n=242)<br>premenopausal |          | 0.69<br>(0.49-0.98) |            |
|                                              |                   |                                 |                                   |                     | Additional breast cancer events (recurrence/breast cancer mortality combined) (n=242)<br>premenopausal |          | 0.69<br>(0.49-0.96) |            |

| Author, year, study name, country, WCRF Code | Study description | Time of diagnosis and follow-up | Disease characteristics treatment | Exposure assessment | Outcome (Events)                                                                                     | Contrast | RR (95% CI)         | Covariates |
|----------------------------------------------|-------------------|---------------------------------|-----------------------------------|---------------------|------------------------------------------------------------------------------------------------------|----------|---------------------|------------|
|                                              |                   |                                 |                                   |                     | st cancer mortality combined) (n=292)<br>postmenopausal                                              |          |                     |            |
|                                              |                   |                                 |                                   |                     | Additional breast cancer events (recurrence/breast cancer mortality combined) (n=255)<br>ER-positive |          | 0.69<br>(0.50-0.98) |            |
|                                              |                   |                                 |                                   |                     | Additional breast cancer events (recurrence/breast cancer mortality combined) (n=267)<br>ER-negative |          | 0.77<br>(0.54-1.09) |            |
|                                              |                   |                                 |                                   |                     | Additional breast cancer events (recurrence/breast cancer mortality combined) (n=517)<br>Stage 0-IV  |          | 0.71<br>(0.56-0.90) |            |
|                                              |                   |                                 |                                   |                     | Additional breast cancer events                                                                      |          | 0.79<br>(0.40-1.55) |            |

| Author, year, study name, country, WCRF Code | Study description | Time of diagnosis and follow-up | Disease characteristics treatment | Exposure assessment | Outcome (Events)                                                                                    | Contrast | RR (95% CI)      | Covariates |
|----------------------------------------------|-------------------|---------------------------------|-----------------------------------|---------------------|-----------------------------------------------------------------------------------------------------|----------|------------------|------------|
|                                              |                   |                                 |                                   |                     | (recurrence/breast cancer mortality combined) (n=71) Stage 0 and I                                  |          |                  |            |
|                                              |                   |                                 |                                   |                     | Additional breast cancer events (recurrence/breast cancer mortality combined) (n=277) Stage II      |          | 0.73 (0.52-1.04) |            |
|                                              |                   |                                 |                                   |                     | Additional breast cancer events (recurrence/breast cancer mortality combined) (n=169) Stage III-IV  |          | 0.63 (0.41-0.95) |            |
|                                              |                   |                                 |                                   |                     | Additional breast cancer events (recurrence/breast cancer mortality combined) (n=158) Tamoxifen use |          | 0.66 (0.40-1.09) |            |

| Author, year, study name, country, WCRF Code | Study description | Time of diagnosis and follow-up | Disease characteristics treatment | Exposure assessment | Outcome (Events)                                                                                         | Contrast | RR (95% CI)      | Covariates |
|----------------------------------------------|-------------------|---------------------------------|-----------------------------------|---------------------|----------------------------------------------------------------------------------------------------------|----------|------------------|------------|
|                                              |                   |                                 |                                   |                     | Additional breast cancer events (recurrence/breast cancer mortality combined) (n=96)<br>No tamoxifen use |          | 0.65 (0.36-1.17) |            |

Abbreviations: ABCPP, After Breast Cancer Pooling Project; BCFR; Breast Cancer Family Registry; LACE, Life After Cancer Epidemiology; SBCCS, Shanghai Breast Cancer Genetics Study; WHEL; Women's Healthy Eating and Living

**Supplementary Table S14. Descriptive table of the included observational studies of post-diagnosis carbohydrate intake and breast cancer prognosis**

| Publication                                        | Study description                                        | Time of diagnosis and follow-up                   | Disease characteristics treatment | Exposure assessment                                         | Outcome (Events)                     | Comparison           | RR (95% CI)      | Covariates                                                                                                                                                                                                                                                                                                        |
|----------------------------------------------------|----------------------------------------------------------|---------------------------------------------------|-----------------------------------|-------------------------------------------------------------|--------------------------------------|----------------------|------------------|-------------------------------------------------------------------------------------------------------------------------------------------------------------------------------------------------------------------------------------------------------------------------------------------------------------------|
| Farvid <sup>48</sup> , 2021, NHS I and NHSII, USA, | Population based cohort (n=8932), Age range: 30-55 years | Diagnosed:1980 to 2010 NHS and 1991 to 2011 NHSII | Stage I-III                       | FFQ 1980-2010 to 2014 in NHS and 1991-2011 to 2015 in NHSII | All-cause mortality (n=2523.0)       | 252.8 vs 171.2 g/day | 1.20 (1.04-1.38) | Age at diagnosis, age at menopause, alcohol intake, aspirin use, BMI change, calendar year, chemotherapy, energy intake, er/pr status, hormonal therapy, menopausal status, physical activity, prediagnosis BMI, race, radiotherapy, smoking, stage, study, time between cancer diagnosis and exposure assessment |
|                                                    |                                                          |                                                   |                                   |                                                             | Cancer specific mortality (n=1071.0) |                      | 1.24 (1.01-1.52) |                                                                                                                                                                                                                                                                                                                   |
|                                                    |                                                          |                                                   |                                   |                                                             | All-cause mortality (n=2523.0)       | 55.5 vs 14.2 g/day   | 0.97(0.85-1.11)  |                                                                                                                                                                                                                                                                                                                   |
|                                                    |                                                          |                                                   |                                   |                                                             |                                      |                      | P trend=0.009    |                                                                                                                                                                                                                                                                                                                   |
|                                                    |                                                          |                                                   |                                   |                                                             |                                      |                      | P trend=0.06     |                                                                                                                                                                                                                                                                                                                   |
|                                                    |                                                          |                                                   |                                   |                                                             |                                      |                      | P trend=0.42     |                                                                                                                                                                                                                                                                                                                   |

| Publication | Study description | Time of diagnosis and follow-up | Disease characteristics treatment | Exposure assessment | Outcome (Events) | Comparison         | RR (95% CI)                       | Covariates                                                                                                                                                                                                                                                                  |
|-------------|-------------------|---------------------------------|-----------------------------------|---------------------|------------------|--------------------|-----------------------------------|-----------------------------------------------------------------------------------------------------------------------------------------------------------------------------------------------------------------------------------------------------------------------------|
|             |                   |                                 |                                   |                     |                  | 23.3 vs 0.9 g/day  | 1.15 (1.01-1.30)<br>P trend=0.008 | BMI change, calendar year, chemotherapy, er/pr status, hormonal therapy, menopausal status, oral contraceptive, physical activity, pre-diagnosis BMI, race, radiotherapy, smoking, stage, study, time between exposure assessment and cancer diagnosis, total energy intake |
|             |                   |                                 |                                   |                     |                  | 23.9 vs 8 g/day    | 0.86 (0.75-0.97)<br>P trend=0.01  |                                                                                                                                                                                                                                                                             |
|             |                   |                                 |                                   |                     |                  | 38.3 vs 5.7 g/day  | 0.92 (0.80-1.05)<br>P trend=0.13  |                                                                                                                                                                                                                                                                             |
|             |                   |                                 |                                   |                     |                  | 10.5 vs 2.1 g/day  | 0.99 (0.88-1.13)<br>P trend=0.47  |                                                                                                                                                                                                                                                                             |
|             |                   |                                 |                                   |                     |                  | 24 vs 4 g/day      | 1.13 (0.99-1.28)<br>P trend=0.14  |                                                                                                                                                                                                                                                                             |
|             |                   |                                 |                                   |                     |                  | 55.5 vs 14.2 g/day | 1.02 (0.83-1.25)<br>P trend=0.99  |                                                                                                                                                                                                                                                                             |
|             |                   |                                 |                                   |                     |                  | 23.3 vs 0.9 g/day  | 1.24 (1.02-1.50)                  |                                                                                                                                                                                                                                                                             |
|             |                   |                                 |                                   |                     |                  |                    |                                   |                                                                                                                                                                                                                                                                             |



| Publication                      | Study description                                        | Time of diagnosis and follow-up                   | Disease characteristics treatment | Exposure assessment                                         | Outcome (Events)                     | Comparison                                   | RR (95% CI)                       | Covariates                                           |
|----------------------------------|----------------------------------------------------------|---------------------------------------------------|-----------------------------------|-------------------------------------------------------------|--------------------------------------|----------------------------------------------|-----------------------------------|------------------------------------------------------|
|                                  |                                                          |                                                   |                                   |                                                             |                                      |                                              | P trend=0.008<br>0.84 (0.69-1.02) |                                                      |
|                                  |                                                          |                                                   |                                   |                                                             |                                      |                                              | P trend=0.14                      |                                                      |
|                                  |                                                          |                                                   |                                   |                                                             | Cancer specific mortality (n=1071.0) | 38.3 vs 5.7 g/day                            | 1.12 (0.91-1.37)<br>P trend=0.36  |                                                      |
|                                  |                                                          |                                                   |                                   |                                                             |                                      | 64.7 vs 25.7 g/day                           | 0.96 (0.79-1.18)<br>P trend=0.50  |                                                      |
|                                  |                                                          |                                                   |                                   |                                                             |                                      | 10.5 vs 2.1 g/day                            | 1.12 (0.92-1.36)<br>P trend=0.44  |                                                      |
|                                  |                                                          |                                                   |                                   |                                                             |                                      | 24 vs 4 g/day                                | 1.25 (1.02-1.52)<br>P trend=0.11  |                                                      |
| Farvid <sup>49</sup> 2021, NHS I | Population based cohort (n=8932), Age range: 30-55 years | Diagnosed:1980 to 2010 NHS and 1991 to 2011 NHSII | Stage I-III                       | FFQ 1980-2010 to 2014 in NHS and 1991-2011 to 2015 in NHSII | All-cause mortality (n=2523)         | Carbohydrates from fruits 55.5 vs 14.2 g/day | 0.97 (0.85-1.11)<br>P trend=0.42  | Study, age at diagnosis, calendar year, time between |

| Publication     | Study description | Time of diagnosis and follow-up | Disease characteristics treatment | Exposure assessment | Outcome (Events) | Comparison                                              | RR (95% CI)                       | Covariates                                                                                                                                                                                                                                                                               |
|-----------------|-------------------|---------------------------------|-----------------------------------|---------------------|------------------|---------------------------------------------------------|-----------------------------------|------------------------------------------------------------------------------------------------------------------------------------------------------------------------------------------------------------------------------------------------------------------------------------------|
| and NHSII, USA, |                   |                                 |                                   |                     |                  | Carbohydrates from juices<br>23.3 vs 0.9 g/day          | 1.15 (1.01-1.30)<br>P trend=0.008 | cancer diagnosis and exposure assessment, pre-diagnosis BMI, BMI changes, smoking, physical activity, oral contraceptive, alcohol intake, total energy intake, menopausal status, age at menopause, aspirin use, race, stage, ER/PR status, radiotherapy, chemotherapy, hormonal therapy |
|                 |                   |                                 |                                   |                     |                  | Carbohydrates from vegetables<br>23.9 vs 8.0 g/day      | 0.86 (0.75-0.97)<br>P trend=0.01  |                                                                                                                                                                                                                                                                                          |
|                 |                   |                                 |                                   |                     |                  | Carbohydrates from whole grains<br>38.3 vs 5.7 g/day    | 0.92 (0.80-1.05)<br>P trend=0.13  |                                                                                                                                                                                                                                                                                          |
|                 |                   |                                 |                                   |                     |                  | Carbohydrates from refined grains<br>64.7 vs 25.7 g/day | 1.16 (1.02-1.32)<br>P trend=0.06  |                                                                                                                                                                                                                                                                                          |
|                 |                   |                                 |                                   |                     |                  | Carbohydrates from legumes<br>10.5 vs 2.1 g/day         | 0.99 (0.88-1.13)<br>P trend=0.47  |                                                                                                                                                                                                                                                                                          |
|                 |                   |                                 |                                   |                     |                  | Carbohydrates from potatoes<br>24 vs 4 g/day            | 1.13 (0.99-1.28)<br>P trend=0.14  |                                                                                                                                                                                                                                                                                          |

| Publication | Study description | Time of diagnosis and follow-up | Disease characteristics treatment | Exposure assessment | Outcome (Events)                          | Comparison                                              | RR (95% CI)                       | Covariates |
|-------------|-------------------|---------------------------------|-----------------------------------|---------------------|-------------------------------------------|---------------------------------------------------------|-----------------------------------|------------|
|             |                   |                                 |                                   |                     | Breast cancer-specific mortality (n=1071) | Carbohydrates from fruits<br>55.5 vs 14.2 g/day         | 1.02 (0.83-1.25)<br>P trend=0.99  |            |
|             |                   |                                 |                                   |                     |                                           | Carbohydrates from juices<br>23.3 vs 0.9 g/day          | 1.24 (1.02-1.50)<br>P trend=0.008 |            |
|             |                   |                                 |                                   |                     |                                           | Carbohydrates from vegetables<br>23.9 vs 8.0 g/day      | 0.84 (0.69-1.02)<br>P trend=0.14  |            |
|             |                   |                                 |                                   |                     |                                           | Carbohydrates from whole grains<br>38.3 vs 5.7 g/day    | 1.12 (0.91-1.37)<br>P trend=0.36  |            |
|             |                   |                                 |                                   |                     |                                           | Carbohydrates from refined grains<br>64.7 vs 25.7 g/day | 0.96 (0.79-1.18)<br>P trend=0.50  |            |
|             |                   |                                 |                                   |                     |                                           | Carbohydrates from legumes<br>10.5 vs 2.1 g/day         | 1.12 (0.92-1.36)<br>P trend=0.44  |            |

| Publication                                         | Study description                                                                                                         | Time of diagnosis and follow-up                 | Disease characteristics treatment                                                                                                                     | Exposure assessment                                                                                       | Outcome (Events)                | Comparison                                   | RR (95% CI)                       | Covariates                                                                                                                                                                                          |
|-----------------------------------------------------|---------------------------------------------------------------------------------------------------------------------------|-------------------------------------------------|-------------------------------------------------------------------------------------------------------------------------------------------------------|-----------------------------------------------------------------------------------------------------------|---------------------------------|----------------------------------------------|-----------------------------------|-----------------------------------------------------------------------------------------------------------------------------------------------------------------------------------------------------|
|                                                     |                                                                                                                           |                                                 |                                                                                                                                                       |                                                                                                           |                                 | Carbohydrates from potatoes<br>24 vs 4 g/day | 1.25 (1.02-1.52)<br>P trend=0.11  |                                                                                                                                                                                                     |
| Emond <sup>50</sup> JA, 2014, WHEL, United States   | Follow up of a nested case-control study (n=265)<br>Mean age: 57<br>Postmenopausal, 84% non-Hispanic White                | Follow up:7.3 years                             | Stage of primary cancer: I: 24.9%, II: 66.0%, III A: 9.1%<br>Chemotherapy:70.1%<br>Radiation therapy: 63.4%<br>Ever tamoxifen use: 75.1%              | 24-hour diet recall, change in carbohydrate intake baseline (mean of 1.9 years after diagnosis) to 1 year | Breast cancer recurrence        | Stable/increased vs. decreased               | 2.0 (1.3 – 5)                     | Carbohydrate and energy intake at baseline as well as change in post-diagnosis energy and fiber intake                                                                                              |
| Beasley <sup>33</sup> JM, 2011, CWLS, United States | Follow up of cases of population-based case-control study (n=4441), age range: 20-79 years, 73% Post-menopausal 99% White | Diagnosis year: 1998-2001, Follow up: 5.5 years | Primary invasive breast cancer; Stages: 72.8% local, 27.2% regional, Surgery: 97.9%; Radiotherapy: 49.8%; Hormonal therapy: 57.8%; Chemotherapy:31.9% | Validated FFQ (126 items), 1-16 years after diagnosis (42% within 5 years)                                | All- cause mortality (n=525)    | 63 vs. 42 % kcal/ day                        | 0.97 (0.72 - 1.3)<br>P trend=0.80 | Age, residence, menopausal status, smoking, stage, alcohol intake, hormonal therapy, interval between diagnosis and diet assessment, BMI, physical activity, breast cancer treatment, energy intake |
|                                                     |                                                                                                                           |                                                 |                                                                                                                                                       |                                                                                                           | Breast cancer mortality (n=137) |                                              | 0.93 (0.54-1.62)<br>P trend=0.87  |                                                                                                                                                                                                     |

| Publication                                      | Study description                                                                                                                                 | Time of diagnosis and follow-up                | Disease characteristics treatment                                                                                                                                                                                                                                                                                                   | Exposure assessment                                                           | Outcome (Events)                                         | Comparison             | RR (95% CI)                        | Covariates                                                                  |
|--------------------------------------------------|---------------------------------------------------------------------------------------------------------------------------------------------------|------------------------------------------------|-------------------------------------------------------------------------------------------------------------------------------------------------------------------------------------------------------------------------------------------------------------------------------------------------------------------------------------|-------------------------------------------------------------------------------|----------------------------------------------------------|------------------------|------------------------------------|-----------------------------------------------------------------------------|
| Belle <sup>51</sup> F, 2011, HEAL, United States | Prospective cohort (n= 688), mean age: 55.3<br>60.9% postmenopausal, 57.7% non-Hispanic white, 28.5% African American, 11.9% Hispanic, 1.9% other | Diagnosis year:1995-1999, follow up: 6.7 years | In situ to IIIA breast cancer                                                                                                                                                                                                                                                                                                       | FFQ (122 items) on average 31.5 months post-diagnosis                         | All-cause mortality (n=106)                              | >175.7 vs. 137.5 g/day | 0.7 (0.38 - 1.29)<br>P trend=0.35  | Energy intake, folate intake, tumour stage, tamoxifen use, treatment, fibre |
|                                                  |                                                                                                                                                   |                                                |                                                                                                                                                                                                                                                                                                                                     |                                                                               | Breast cancer mortality (n=83)                           |                        | 0.59 (0.3 - 1.17)<br>P trend=0.21  |                                                                             |
|                                                  |                                                                                                                                                   |                                                |                                                                                                                                                                                                                                                                                                                                     |                                                                               | Nonfatal or new recurrence (n=82)                        |                        | 0.62 (0.31 - 1.23)<br>P trend=0.26 |                                                                             |
| Borugian M, 2004, VCC-CCA, Canada                | Prospective cohort of breast cancer survivors (n=603) mean age:54.5, 39% premenopausal, 61% postmenopausal                                        | Follow Up: 10 years average                    | Tumor grades: 7.6% well differentiated, 46.4% moderately differentiated, 46% poorly differentiated<br>Systemic treatment: Tamoxifen only: 21.9%;<br>Chemotherapy only: 14.7%;<br>Chemotherapy and tamoxifen: 21.4%;<br>Other hormone 1.9%;<br>None 40.1%. Local treatment: lumpectomy alone: 4.6%; Lumpectomy + RT: 14.6%; Complete | Semi-quantitative FFQ Questionnaire of during diagnosis Recruitment 1991-1992 | Post-menopausal Breast cancer-specific mortality (n=112) | ≥ 224 vs ≤ 146g/day    | 1.50 (0.70-3.40)<br>P trend=0.69   | Age, energy intake, tumor stage                                             |
|                                                  |                                                                                                                                                   |                                                |                                                                                                                                                                                                                                                                                                                                     |                                                                               | Breast cancer-specific mortality (n=112)                 |                        | Per 1 % Energy<br>1.00 (0.99-1.03) |                                                                             |

| Publication                                                                                   | Study description                                                                         | Time of diagnosis and follow-up            | Disease characteristics treatment                      | Exposure assessment                                                      | Outcome (Events)                                 | Comparison          | RR (95% CI)                        | Covariates                                                                                                                                                                            |
|-----------------------------------------------------------------------------------------------|-------------------------------------------------------------------------------------------|--------------------------------------------|--------------------------------------------------------|--------------------------------------------------------------------------|--------------------------------------------------|---------------------|------------------------------------|---------------------------------------------------------------------------------------------------------------------------------------------------------------------------------------|
|                                                                                               |                                                                                           |                                            | mastectomy alone: 59.6%; Complete                      |                                                                          | Pre-menopausal Breast cancer-specific mortality  | ≥ 224 vs ≤ 146g/day | 1.30 (0.30-5.10)<br>P trend=0.73   |                                                                                                                                                                                       |
|                                                                                               |                                                                                           |                                            |                                                        |                                                                          |                                                  | Per 1 % Energy      | 1.00 (0.97-1.04)                   |                                                                                                                                                                                       |
|                                                                                               |                                                                                           |                                            |                                                        |                                                                          | Post-menopausal Breast cancer-specific mortality | ≥ 224 vs ≤ 146g/day | 2.00 (0.70-5.70)<br>P trend=0.47   |                                                                                                                                                                                       |
|                                                                                               |                                                                                           |                                            |                                                        |                                                                          |                                                  | Per 1 % Energy      | 1.02 (0.99-1.05)                   |                                                                                                                                                                                       |
| Holmes <sup>34</sup> MD, 1999, NHS, United States (superseded by Farvid <sup>48</sup> , 2021) | Population-based prospective cohort study (n=1982), mean age: 54 Pre- and post-menopausal | Diagnosis 1976-1990, follow up: 157 months | Invasive breast carcinoma 62% no lymph node metastases | FFQ (up to 2 years after diagnosis) on average 24 months post-diagnosis. | All-cause mortality (n=378)                      | Q5 vs. Q1           | 0.91 (0.65 - 1.26)<br>P trend=0.79 | Age, diet interval, year of diagnosis, oral contraceptive, hormonal therapy, smoking, age at first birth and parity, nodal status, tumour size, BMI, menopausal status, energy intake |
| Rohan <sup>52</sup> T 1993, SACCR follow-up, Australia                                        | Follow-up of cases of population-based case-control (n=412), mean                         | Follow up: 5.5 years median                | Invasive primary breast cancer, any stage              | Self-administered FFQ (179 dietary items) on average 4.8                 | Breast cancer-specific mortality (n=112)         | ≥256 vs <144g/day   | 0.61 (0.31-1.22)<br>P = 0.13       | Energy intake, age of menarche, quetelet index                                                                                                                                        |

| Publication | Study description                   | Time of diagnosis and follow-up | Disease characteristics treatment | Exposure assessment    | Outcome (Events) | Comparison | RR (95% CI) | Covariates |
|-------------|-------------------------------------|---------------------------------|-----------------------------------|------------------------|------------------|------------|-------------|------------|
|             | age: 55.1, pre- and post-menopausal |                                 |                                   | months post-diagnosis. |                  |            |             |            |

Abbreviations: CWLS, Collaborative Women's Longevity Study; HEAL, Health, Eating, Activity, and Lifestyle Study; NHS, Nurses' Health Study; SACCR, South Australian Central Cancer Registry; WHEL; Women's Healthy Eating and Living

**Supplementary Table S15. Descriptive table of the included observational studies of post-diagnosis protein intake and breast cancer prognosis**

| Publication, WCRF Code                            | Study description                                                                          | Time of diagnosis and follow-up                    | Disease characteristics treatment | Exposure assessment                                                                 | Outcome (Events)                     | Comparison          | RR (95% CI)                                                    | Covariates                                                                                                                                                                                                                                                                                                        |
|---------------------------------------------------|--------------------------------------------------------------------------------------------|----------------------------------------------------|-----------------------------------|-------------------------------------------------------------------------------------|--------------------------------------|---------------------|----------------------------------------------------------------|-------------------------------------------------------------------------------------------------------------------------------------------------------------------------------------------------------------------------------------------------------------------------------------------------------------------|
| <b>Total Protein</b>                              |                                                                                            |                                                    |                                   |                                                                                     |                                      |                     |                                                                |                                                                                                                                                                                                                                                                                                                   |
| Farvid <sup>48</sup> MS, 2021, NHS and NHSII, USA | Population based cohort (n=8932), Age range: 30-55 years                                   | Diagnosed: 1980 to 2010 NHS and 1991 to 2011 NHSII | Stage I-III                       | FFQ 1980-2010 to 2014 in NHS and 1991-2011 to 2015 in NHSII                         | All-cause mortality (n=2523.0)       | 89 vs 57.4 g/day    | 0.80 (0.70-0.91)                                               | Age at diagnosis, age at menopause, alcohol intake, aspirin use, BMI change, calendar year, chemotherapy, energy intake, er/pr status, hormonal therapy, menopausal status, physical activity, prediagnosis BMI, race, radiotherapy, smoking, stage, study, time between cancer diagnosis and exposure assessment |
|                                                   |                                                                                            |                                                    |                                   |                                                                                     | Cancer specific mortality (n=1071.0) |                     | P trend=0.0009                                                 |                                                                                                                                                                                                                                                                                                                   |
| Holmes <sup>39</sup> MD, 2017, NHS, United States | Prospective cohort of cancer survivors (n=6348), Age range: 30-55, Pre- and postmenopausal | Diagnosis year:1976 – 2004, Follow up:16 years     | Stage I to III                    | Validated semiquantitative FFQ (61 to 116 items), at least 12 months post-diagnosis | All- cause mortality (n=1847)        | 88.3 vs. 61.5 g/day | 0.98 (0.85 - 1.14)                                             | Age, time since diagnosis, energy intake, BMI, weight change, age at first birth, parity, oral contraceptive, menopausal status, hormone therapy, aspirin use, alcohol, smoking, physical activity, tumour stage, radiation                                                                                       |
|                                                   |                                                                                            |                                                    |                                   |                                                                                     | Breast cancer mortality (n=919)      |                     | P trend=0.5<br><br>(superseded by Farvid <sup>48</sup> , 2021) |                                                                                                                                                                                                                                                                                                                   |
|                                                   |                                                                                            |                                                    |                                   |                                                                                     |                                      |                     | 0.95 (0.77 - 1.17)                                             |                                                                                                                                                                                                                                                                                                                   |
|                                                   |                                                                                            |                                                    |                                   |                                                                                     |                                      |                     | P trend=0.17                                                   |                                                                                                                                                                                                                                                                                                                   |



| Publication, WCRF Code                              | Study description                                                                                                          | Time of diagnosis and follow-up                 | Disease characteristics treatment                                                                                                                                                                                                                           | Exposure assessment                                                           | Outcome (Events)                                                                                                       | Comparison                                                     | RR (95% CI)                                                                                                                    | Covariates                                                                                                                                                                                             |
|-----------------------------------------------------|----------------------------------------------------------------------------------------------------------------------------|-------------------------------------------------|-------------------------------------------------------------------------------------------------------------------------------------------------------------------------------------------------------------------------------------------------------------|-------------------------------------------------------------------------------|------------------------------------------------------------------------------------------------------------------------|----------------------------------------------------------------|--------------------------------------------------------------------------------------------------------------------------------|--------------------------------------------------------------------------------------------------------------------------------------------------------------------------------------------------------|
|                                                     |                                                                                                                            |                                                 |                                                                                                                                                                                                                                                             |                                                                               |                                                                                                                        |                                                                | (superseded by Farvid <sup>48</sup> , 2021)                                                                                    | therapy, treatment, calendar year                                                                                                                                                                      |
|                                                     |                                                                                                                            |                                                 |                                                                                                                                                                                                                                                             |                                                                               | Distant recurrence (n=1046)                                                                                            |                                                                | 0.84 (0.69 - 1.03)                                                                                                             |                                                                                                                                                                                                        |
|                                                     |                                                                                                                            |                                                 |                                                                                                                                                                                                                                                             |                                                                               |                                                                                                                        |                                                                | P trend=0.02                                                                                                                   |                                                                                                                                                                                                        |
| Beasley <sup>33</sup> JM, 2011, CWLS, United States | Follow up of cases of population-based case-control study (n=4441), Age range: 20-79 years, 73% Post-menopausal, 99% White | Diagnosis year: 1998-2001, Follow up: 5.5 years | Primary invasive breast cancer; Stages: 72.8% local, 27.2% regional, Surgery: 97.9%; Radiotherapy: 49.8%; Hormonal therapy: 57.8%; Chemotherapy: 31.9%                                                                                                      | Validated FFQ (126 items), 1-16 years after diagnosis (42% within 5 years)    | All- cause mortality (n=525)<br><br>Breast cancer mortality (n=137)                                                    | 21 vs. 13 % kcal/ day                                          | 0.98 (0.73 - 1.31)<br><br>P trend=0.72<br><br>1.19 (0.66 - 2.14)<br><br>P trend=0.49                                           | Age, residence, menopausal status, smoking, stage, alcohol intake, hormonal therapy, interval between diagnosis and baseline interview, BMI, physical activity, breast cancer treatment, energy intake |
| Borugian, 2004, VCC-BCCA, Canada                    | Prospective cohort of 603 breast cancer survivors, mean age:54.5, 39% premenopausal, 61% postmenopausal                    | Follow Up: Average 10 years                     | Tumor grades: 7.6% well differentiated, 46.4% moderately differentiated, 46% poorly differentiated Systemic treatment: Tamoxifen only: 21.9%; Chemotherapy only: 14.7%; Chemotherapy and tamoxifen: 21.4%; Other hormone 1.9%; None 40.1%. Local treatment: | Semi-quantitative FFQ Questionnaire of during diagnosis Recruitment 1991-1992 | cancer-specific mortality (n=112)<br><br>Breast cancer-specific mortality (n=112)<br><br>Pre-menopausal Breast cancer- | ≥83 vs ≤52 g/day<br><br>Per 1 % Energy<br><br>≥83 vs ≤52 g/day | 0.4 (0.20-0.80)<br><br>P trend=0.07<br><br>0.87 (0.82-0.93)<br><br>P trend ≤0.0001<br><br>0.20 (0.10-0.90)<br><br>P trend=0.14 | Age, energy intake, tumor stage                                                                                                                                                                        |

| Publication, WCRF Code           | Study description | Time of diagnosis and follow-up | Disease characteristics treatment                                                          | Exposure assessment                       | Outcome (Events)                                 | Comparison                            | RR (95% CI)                                                                       | Covariates                                                                                                                                                                                                 |
|----------------------------------|-------------------|---------------------------------|--------------------------------------------------------------------------------------------|-------------------------------------------|--------------------------------------------------|---------------------------------------|-----------------------------------------------------------------------------------|------------------------------------------------------------------------------------------------------------------------------------------------------------------------------------------------------------|
|                                  |                   |                                 | lumpectomy alone: 4.6%; Lumpectomy + RT: 14.6%; Complete mastectomy alone: 59.6%; Complete |                                           | specific mortality                               | Per 1 % Energy                        | 0.81 (0.73-0.90)<br><br>P trend ≤0.0001                                           |                                                                                                                                                                                                            |
|                                  |                   |                                 |                                                                                            |                                           | Post-menopausal Breast cancer-specific mortality | ≥83 vs ≤52 g/day                      | 0.60 (0.20-1.60)<br><br>P trend=0.12                                              |                                                                                                                                                                                                            |
|                                  |                   |                                 |                                                                                            |                                           |                                                  | Per 1 % Energy                        | 0.91 (0.84-0.99)<br><br>P trend=0.03                                              |                                                                                                                                                                                                            |
| Holmes <sup>34</sup> , 1999, NHS |                   |                                 |                                                                                            |                                           | All-cause mortality (n=378)                      | ≥81.6 vs ≤60.9g/day                   | 0.65 (0.47-0.88)<br><br>P trend<0.001 (superseded by Farvid <sup>48</sup> , 2021) | Age, time between exposure assessment and diagnosis, year of diagnosis, oral contraceptive, hormonal therapy, smoking, age at first birth, nodal status, tumor size, BMI, menopausal status, energy intake |
|                                  |                   |                                 |                                                                                            | Nonmetastatic All-cause mortality (n=128) |                                                  | 0.49 (0.28-0.84)<br><br>P trend=0.006 |                                                                                   |                                                                                                                                                                                                            |
|                                  |                   |                                 |                                                                                            | Metastatic All-cause mortality            |                                                  | 0.71 (0.48-1.05)<br><br>P trend=0.02  |                                                                                   |                                                                                                                                                                                                            |

| Publication, WCRF Code                                 | Study description                                                                                          | Time of diagnosis and follow-up                    | Disease characteristics treatment         | Exposure assessment                                                            | Outcome (Events)                                                       | Comparison         | RR (95% CI)                                                                      | Covariates                                                                                                                                                                                                                                                                                                        |
|--------------------------------------------------------|------------------------------------------------------------------------------------------------------------|----------------------------------------------------|-------------------------------------------|--------------------------------------------------------------------------------|------------------------------------------------------------------------|--------------------|----------------------------------------------------------------------------------|-------------------------------------------------------------------------------------------------------------------------------------------------------------------------------------------------------------------------------------------------------------------------------------------------------------------|
|                                                        |                                                                                                            |                                                    |                                           |                                                                                | (n=250)                                                                |                    |                                                                                  |                                                                                                                                                                                                                                                                                                                   |
| Rohan <sup>52</sup> T 1993, SACCR follow-up, Australia | Follow-up of cases of population-based case-control study of 412 pre- and postmenopausal<br>Mean age: 55.1 | Follow up: 5.5 years median                        | Invasive primary breast cancer, any stage | Self-administered FFQ (179 dietary items) on average 4.8 months post-diagnosis | Breast cancer-specific mortality (n=112)                               | ≥103 vs ≤59g/day   | 0.74 (0.34-1.66)<br><br>P = 0.573                                                | Energy intake, age of menarche, quetelet index                                                                                                                                                                                                                                                                    |
| <b>Animal Protein</b>                                  |                                                                                                            |                                                    |                                           |                                                                                |                                                                        |                    |                                                                                  |                                                                                                                                                                                                                                                                                                                   |
| Farvid MS, 2021 <sup>48</sup> , NHS and NHSII, USA     | Population based cohort (n=8932), Age range: 30-55 years                                                   | Diagnosed: 1980 to 2010 NHS and 1991 to 2011 NHSII | Stage I-III                               | FFQ at least 12 months post-diagnosis                                          | All-cause mortality (n=2523.0)<br>Cancer specific mortality (n=1071.0) | 65.9 vs 33.7 g/day | 0.92 (0.8-1.04)<br><br>P trend=0.12<br><br>0.73 (0.60-0.89)<br><br>P trend=0.001 | Age at diagnosis, age at menopause, alcohol intake, aspirin use, BMI change, calendar year, chemotherapy, energy intake, ER/PR status, hormonal therapy, menopausal status, physical activity, prediagnosis BMI, race, radiotherapy, smoking, stage, study, time between cancer diagnosis and exposure assessment |

| Publication, WCRF Code                                                                    | Study description                                                                          | Time of diagnosis and follow-up                   | Disease characteristics treatment | Exposure assessment                                                                 | Outcome (Events)                     | Comparison          | RR (95% CI)                         | Covariates                                                                                                                                                                                                                                                                                |
|-------------------------------------------------------------------------------------------|--------------------------------------------------------------------------------------------|---------------------------------------------------|-----------------------------------|-------------------------------------------------------------------------------------|--------------------------------------|---------------------|-------------------------------------|-------------------------------------------------------------------------------------------------------------------------------------------------------------------------------------------------------------------------------------------------------------------------------------------|
| Holmes <sup>39</sup><br>MD, 2017, NHS, USA<br>(superseded by Farvid <sup>48</sup> , 2021) | Prospective cohort of cancer survivors (n=6348), Age range: 30-55, Pre- and postmenopausal | Diagnosis year: 1976 – 2004, Follow up: 16 years  | Stage I to III                    | Validated semiquantitative FFQ (61 to 116 items), at least 12 months post-diagnosis | All- cause mortality (n=1847)        | 68.5 vs. 41.5 g/day | 0.99 (0.85 - 1.15)<br>P trend=0.6   | Age, time since diagnosis, energy intake, BMI, weight change, age at first birth, parity, oral contraceptive, menopausal status, hormone therapy, aspirin use, alcohol, smoking, physical activity, tumour stage, radiation therapy, treatment, calendar year, vegetable protein          |
|                                                                                           |                                                                                            |                                                   |                                   |                                                                                     | Breast cancer mortality (n=919)      |                     | 0.85 (0.68 - 1.05)<br>P trend=0.044 |                                                                                                                                                                                                                                                                                           |
|                                                                                           |                                                                                            |                                                   |                                   |                                                                                     | Distant recurrence (n=1046)          |                     | 0.78 (0.63 - 0.95)<br>P trend=0.003 |                                                                                                                                                                                                                                                                                           |
| <b>Vegetable Protein</b>                                                                  |                                                                                            |                                                   |                                   |                                                                                     |                                      |                     |                                     |                                                                                                                                                                                                                                                                                           |
| Farvid <sup>48</sup> , 2021, NHS and NHSII, USA                                           | Population based cohort (n=8932), Age range: 30-55 years                                   | Diagnosed:1980 to 2010 NHS and 1991 to 2011 NHSII | Stage I-III                       | FFQ 1980-2010 to 2014 in NHS and 1991-2011 to 2015 in NHSII                         | All-cause mortality (n=2523.0)       | 29.8 vs 175 g/day   | 0.86 (0.75-0.98)<br>P trend=0.03    | Age at diagnosis, age at menopause, alcohol intake, aspirin use, BMI change, calendar year, chemotherapy, energy intake, er/pr status, hormonal therapy, menopausal status, physical activity, prediagnosis BMI, race, radiotherapy, smoking, stage, study, time between cancer diagnosis |
|                                                                                           |                                                                                            |                                                   |                                   |                                                                                     | Cancer specific mortality (n=1071.0) |                     | 0.96 (0.78-1.17)<br>P trend=0.87    |                                                                                                                                                                                                                                                                                           |

| Publication, WCRF Code                                                                             | Study description                                                                                            | Time of diagnosis and follow-up                             | Disease characteristics treatment | Exposure assessment                                                                                    | Outcome (Events)                                                                                                             | Comparison           | RR (95% CI)                                                                                                                                 | Covariates                                                                                                                                                                                                                                                                                                              |
|----------------------------------------------------------------------------------------------------|--------------------------------------------------------------------------------------------------------------|-------------------------------------------------------------|-----------------------------------|--------------------------------------------------------------------------------------------------------|------------------------------------------------------------------------------------------------------------------------------|----------------------|---------------------------------------------------------------------------------------------------------------------------------------------|-------------------------------------------------------------------------------------------------------------------------------------------------------------------------------------------------------------------------------------------------------------------------------------------------------------------------|
|                                                                                                    |                                                                                                              |                                                             |                                   |                                                                                                        |                                                                                                                              |                      |                                                                                                                                             | and exposure assessment                                                                                                                                                                                                                                                                                                 |
| Holmes <sup>39</sup><br>MD, 2017,<br>NHS, USA<br>(superseded<br>by Farvid <sup>48</sup> ,<br>2021) | Prospective<br>cohort of cancer<br>survivors (n=<br>6348), age<br>range: 30-55<br>Pre- and<br>postmenopausal | Diagnosis<br>year: 1976 -<br>2004<br>Follow up=<br>16 years | Stage: I to III                   | Validated<br>semiquantitative<br>FFQ (61<br>to 116 items),<br>at least 12<br>months post-<br>diagnosis | All- cause<br>mortality<br>(n=1847)<br><br>Breast<br>cancer<br>mortality<br>(n=919)<br><br>Distant<br>recurrence<br>(n=1046) | 25 vs. 14.3<br>g/day | 0.97 (0.83 -<br>1.14)<br><br>P trend=0.59<br><br>1.09 (0.87 -<br>1.37)<br><br>P trend=0.44<br><br>1.20 (0.97 -<br>1.49)<br><br>P trend=0.08 | Age, time since<br>diagnosis, energy<br>intake, BMI, weight<br>change, age at first<br>birth, parity, oral<br>contraceptive,<br>menopausal status,<br>hormone therapy,<br>aspirin use, alcohol,<br>smoking, physical<br>activity, tumour<br>stage, radiation<br>therapy, treatment,<br>calendar year,<br>animal protein |

Abbreviations: CWLS, Collaborative Women's Longevity Study; NHS, Nurses' Health Study; SACCR, South Australian Central Cancer Registry; VCC-BCCA, Vancouver Cancer Centre of the British Columbia Cancer Agency

**Supplementary Table S16. Descriptive table of the included observational studies of post-diagnosis fat intake and breast cancer prognosis**

| Publication, WCRF Code                             | Study description                                                                                                  | Time of diagnosis and follow-up                                                                                 | Disease characteristics and treatment                                                                                                      | Exposure assessment                                                          | Outcome (Events)                                                   | Comparison          | RR (95% CI)                                                                         | Covariates                                                                                                                                                                                             |
|----------------------------------------------------|--------------------------------------------------------------------------------------------------------------------|-----------------------------------------------------------------------------------------------------------------|--------------------------------------------------------------------------------------------------------------------------------------------|------------------------------------------------------------------------------|--------------------------------------------------------------------|---------------------|-------------------------------------------------------------------------------------|--------------------------------------------------------------------------------------------------------------------------------------------------------------------------------------------------------|
| <b>Total Fats</b>                                  |                                                                                                                    |                                                                                                                 |                                                                                                                                            |                                                                              |                                                                    |                     |                                                                                     |                                                                                                                                                                                                        |
| Beasley <sup>33</sup><br>2011, CWLS, United States | Follow up of cases of case-control study (n=4441), age range: 20-79 years, post-menopausal 73%, race: mostly White | Diagnosis: 1998-2001, follow-up: 5.5 years, 525 deaths, 137 from breast cancer, 132 from cardiovascular disease | Primary invasive breast cancer, local 72.8%, regional 27.2%, surgery 97.9%, chemotherapy 31.9%, radiotherapy 49.8%, hormonal therapy 57.8% | Validated FFQ, 126 items, at 1-16 years after diagnosis (42% within 5 years) | All-cause mortality (n=525)<br><br>Breast cancer mortality (n=137) | 39% vs 23% kcal/day | 1.05 (0.79 - 1.39)<br><br>P trend=0.98<br><br>0.92 (0.53 - 1.6)<br><br>P trend=0.39 | Age, residence, menopausal status, smoking, stage, alcohol intake, hormonal therapy, interval between diagnosis and baseline interview, BMI, physical activity, breast cancer treatment, energy intake |
| Borugian <sup>53</sup><br>2004, VCCBCCA, Canada    | Prospective cohort study (n=603), mean age: 54.5 years, post-menopausal 61%                                        | Recruitment: 1991-1992, follow-up: 10 years                                                                     | Tumour grade well differentiated 7.6%, moderately differentiated 46.4%, poorly differentiated 46%,                                         | Semi-quantitative FFQ, self-administered, at 2 months after surgery          | Breast cancer mortality (n=112)                                    | ≥76 vs <43 g/day    | 1.80 (0.90 – 4.80)<br><br>P trend=0.35                                              | Age, total caloric intake, stage at diagnosis                                                                                                                                                          |

|                                     |                                                                                                       |                                                                                             |                                                                                                                                                                                                |                                                 |                                                                                    |                  |                                        |                                                                                                                                                                                                                          |
|-------------------------------------|-------------------------------------------------------------------------------------------------------|---------------------------------------------------------------------------------------------|------------------------------------------------------------------------------------------------------------------------------------------------------------------------------------------------|-------------------------------------------------|------------------------------------------------------------------------------------|------------------|----------------------------------------|--------------------------------------------------------------------------------------------------------------------------------------------------------------------------------------------------------------------------|
|                                     |                                                                                                       |                                                                                             | complete mastectomy alone 59.6%, lumpectomy alone 4.6%, lumpectomy + RT 14.6%, chemotherapy only 14.7%, tamoxifen only 21.9%, chemotherapy and tamoxifen 21.4%, other hormone 1.9%, none 40.1% | but before the start of adjuvant treatment      | Breast cancer mortality, premenopausal                                             |                  | 4.80 (1.3-18.10)<br>P trend 0.08       |                                                                                                                                                                                                                          |
|                                     |                                                                                                       |                                                                                             |                                                                                                                                                                                                |                                                 | Breast cancer mortality, postmenopausal                                            |                  | 0.7 (0.2-2.20)<br>P trend=0.49         |                                                                                                                                                                                                                          |
| Holmes <sup>34</sup> 1999, NHS, USA | Population-based cohort study (n= 1982), mean age: 54 years, postmenopausal 64.9%, race: mostly White | Diagnosis: 1976-1990, follow-up: 157 months, until 1994, 378 deaths, 326 from breast cancer | Invasive breast carcinoma, grade 1-3                                                                                                                                                           | FFQ, 85 items, at up to 2 years after diagnosis | All- cause mortality (n=378)<br><br>(superseded by Farvid <sup>48</sup> , 2021)    | 69.7 vs 53 g/day | 1.21 (0.78 - 1.90)<br><br>P trend=0.72 | Age, diet interval, year of diagnosis, oral contraceptive, postmenopausal hormone use, smoking, age at first birth, number of metastatic lymph nodes, tumour size, BMI, menopausal status, energy intake, caloric intake |
|                                     |                                                                                                       |                                                                                             |                                                                                                                                                                                                |                                                 | Breast cancer mortality (n=326)<br><br>(superseded by Farvid <sup>48</sup> , 2021) |                  | 1.44 (1.01 - 2.04)<br><br>P trend=0.25 |                                                                                                                                                                                                                          |

|                                                    |                                                                                                   |                                                                  |                                                           |                                                                                         |                                          |                     |                                                          |                                                                                                                                                                                                                                                                                                                                                                                        |
|----------------------------------------------------|---------------------------------------------------------------------------------------------------|------------------------------------------------------------------|-----------------------------------------------------------|-----------------------------------------------------------------------------------------|------------------------------------------|---------------------|----------------------------------------------------------|----------------------------------------------------------------------------------------------------------------------------------------------------------------------------------------------------------------------------------------------------------------------------------------------------------------------------------------------------------------------------------------|
| Ewertz <sup>54</sup><br>1991,<br>DBCCG,<br>Denmark | Prospective<br>cohort study<br>(n=2445), age<br>maximum: 70<br>years, pre- and<br>post-menopausal | Diagnosis:<br>1983-1984,<br>follow-up: 7<br>years, 805<br>deaths | Primary invasive<br>breast cancer                         | Semi-<br>quantitative<br>FFQ                                                            | All- cause<br>mortality<br>(n=805)       | Q4 vs Q1            | 0.96 (0.75 -<br>1.22)                                    | Age, tumour<br>size, nodal<br>status, tumour<br>grade, skin<br>invasion, area of<br>residence                                                                                                                                                                                                                                                                                          |
| Farvid <sup>48</sup><br>2021, NHS I<br>and II, USA | Population-<br>based cohort<br>study (n=8932),<br>age range: 30-55<br>years                       | Diagnosis:<br>1980-2021,<br>1991-2011                            | Stage I-III                                               | FFQ at least<br>12 months<br>post-diagnosis                                             | All-cause<br>mortality<br>(n=2523)       | 70.5 vs 41<br>g/day | 0.85 (0.74-<br>0.97)<br><br>P trend=0.02                 | Age at<br>diagnosis, age<br>at menopause,<br>alcohol intake,<br>aspirin use, BMI<br>change,<br>calendar year,<br>chemotherapy,<br>energy intake,<br>er/pr status,<br>hormonal<br>therapy,<br>menopausal<br>status, physical<br>activity,<br>prediagnosis<br>BMI, race,<br>radiotherapy,<br>smoking, stage,<br>study, time<br>between cancer<br>diagnosis and<br>exposure<br>assessment |
|                                                    |                                                                                                   |                                                                  |                                                           |                                                                                         | Cancer-specific<br>mortality<br>(n=1071) | 70.5 vs 41<br>g/day | 0.94 (0.76-<br>1.15)<br><br>P trend=0.69                 |                                                                                                                                                                                                                                                                                                                                                                                        |
| Nomura <sup>55</sup><br>1991,<br>HCJFS,<br>USA     | Prospective<br>cohort study<br>(n=343), age<br>range: 45-74<br>years, race:<br>White and Asian    | Diagnosis:<br>1975 and<br>1980, follow-<br>up: 12.5 years        | In situ 5%, localized<br>56%, regional 36%,<br>distant 3% | Structured<br>interview, 43<br>items, at on<br>average 2.2<br>months after<br>diagnosis | All-cause<br>mortality (n=34)            | High vs low         | <i>Caucasian<br/>subgroup</i>                            | Stage of<br>disease,<br>menopausal<br>status, obesity<br>index, estrogen<br>use                                                                                                                                                                                                                                                                                                        |
|                                                    |                                                                                                   |                                                                  |                                                           |                                                                                         | All-cause<br>mortality (n=25)            |                     | 3.17 (1.17-<br>8.55)<br><br><i>Japanese<br/>subgroup</i> |                                                                                                                                                                                                                                                                                                                                                                                        |



|                                                      |                                                                                                           |                                                        |                                                                                                                                                                                                                                                                   |                                                                             |                                          |                                 |                                  |                                                |
|------------------------------------------------------|-----------------------------------------------------------------------------------------------------------|--------------------------------------------------------|-------------------------------------------------------------------------------------------------------------------------------------------------------------------------------------------------------------------------------------------------------------------|-----------------------------------------------------------------------------|------------------------------------------|---------------------------------|----------------------------------|------------------------------------------------|
|                                                      |                                                                                                           |                                                        |                                                                                                                                                                                                                                                                   |                                                                             |                                          |                                 | 0.66 (0.25-1.76)                 |                                                |
| Pierce 2007 <sup>11</sup> , WHEL, USA                | Randomised controlled trial (n= 1490), mean age: 50 years, pre- and post-menopausal, race: mostly White   | Diagnosis: 1991-2000, follow-up: 6.7 years, until 2005 | Stage I 40%, II 45%, III 15%, grade I 15.9%, II 39.8%, III 35.8%, unknown 8.3%, ER+/PR+ 63.1%, ER+/PR- 10.8%, ER-/PR+ 5.1%, ER-/PR- 20.8%, no chemotherapy 31.4%, non-anthracycline 25.7%, anthracycline 42.8%, adjuvant tamoxifen 42%, no adjuvant tamoxifen 58% | 24-hr food recall and questionnaire, at on average 20 months post-diagnosis | All-cause mortality (n=135)              | 33-59% vs 9-24% energy from fat | 1.39<br>P trend=0.10             |                                                |
| Rohan <sup>52</sup> 1993, SACCR follow-up, Australia | Follow-up of population-based case-control study (n= 412), mean age: 55.1 years, pre- and post-menopausal | Diagnosis: 1982-1984, follow-up: 5.5 years, until 1989 | Stage I-IV                                                                                                                                                                                                                                                        | FFQ                                                                         | Breast cancer-specific mortality (n=112) | ≥108 vs <56 g/day               | 1.40 (0.66-2.96)<br>P trend=0.52 | Energy intake, Age of menarche, Quetelet Index |
| Newman <sup>56</sup> 1986, Canada                    | Prospective cohort of cancer survivors (n=298), age range: 35-74 years, pre- and postmenopausal           | Diagnosis: 1973-1975, follow-up: maximum 7 years       | Nonmetastatic disease                                                                                                                                                                                                                                             | Measured 3-5 months after surgery                                           | Breast cancer-specific mortality (n=72)  | ≥77.7 vs ≤77.7 g/day            | 0.91<br>P trend=0.69             | Body weight                                    |
| <b>Saturated Fats</b>                                |                                                                                                           |                                                        |                                                                                                                                                                                                                                                                   |                                                                             |                                          |                                 |                                  |                                                |

|                                                       |                                                                                                    |                                                                                                                             |                                                                                                                                                                                                                                                                                                   |                                                                                                                |                                          |                      |                    |                                                                                                                                                                                                        |
|-------------------------------------------------------|----------------------------------------------------------------------------------------------------|-----------------------------------------------------------------------------------------------------------------------------|---------------------------------------------------------------------------------------------------------------------------------------------------------------------------------------------------------------------------------------------------------------------------------------------------|----------------------------------------------------------------------------------------------------------------|------------------------------------------|----------------------|--------------------|--------------------------------------------------------------------------------------------------------------------------------------------------------------------------------------------------------|
| Beasley <sup>33</sup><br>2011,<br>CWLS, USA           | Follow up of case-control study (n=4441), age range: 20-79 years, post-menopausal 73%, race: White | Diagnosis: 1998-2001, follow-up: 5.5 years, until 2015, 525 deaths, 137 from breast cancer, 132 from cardiovascular disease | Primary invasive breast cancer, local 72.8%, regional 27.2%, surgery 97.9%, chemotherapy 31.9%, radiotherapy 49.8%, hormonal therapy 57.8%                                                                                                                                                        | Validated FFQ, 126 items, at 1-16 years after diagnosis (42% within 5 years)                                   | All- cause mortality (n=525)             | 13 vs. 7 % kcal/ day | 1.41 (1.06-1.87)   | Age, residence, menopausal status, smoking, stage, alcohol intake, hormonal therapy, interval between diagnosis and baseline interview, BMI, physical activity, breast cancer treatment, energy intake |
|                                                       |                                                                                                    |                                                                                                                             |                                                                                                                                                                                                                                                                                                   |                                                                                                                | Breast cancer mortality (n=137)          |                      | P trend=0.03       |                                                                                                                                                                                                        |
| Borugian <sup>53</sup><br>2004,<br>VCCBCCA,<br>Canada | Prospective cohort study (n=603), mean age: 54.5 years, post-menopausal 61%                        | Recruitment: 1991-1992, follow-up: 10 years                                                                                 | Tumour grade well differentiated 7.6%, moderately differentiated 46.4%, poorly differentiated 46%, complete mastectomy alone 59.6%, lumpectomy alone 4.6%, lumpectomy + RT 14.6%, chemotherapy only 14.7%, tamoxifen only 21.9%, chemotherapy and tamoxifen 21.4%, other hormone 1.9%, none 40.1% | Semi-quantitative FFQ, self-administered, at 2 months after surgery but before the start of adjuvant treatment | Breast cancer mortality (n=112)          | Q4 vs Q1             | 2.50 (1.20 - 5.30) | Age, total caloric intake, stage at diagnosis                                                                                                                                                          |
|                                                       |                                                                                                    |                                                                                                                             |                                                                                                                                                                                                                                                                                                   |                                                                                                                | Breast cancer mortality, pre-menopausal  |                      | P trend=0.07       |                                                                                                                                                                                                        |
|                                                       |                                                                                                    |                                                                                                                             |                                                                                                                                                                                                                                                                                                   |                                                                                                                | Breast cancer mortality, post-menopausal |                      | 4.90 (1.40-17.00)  |                                                                                                                                                                                                        |
|                                                       |                                                                                                    |                                                                                                                             |                                                                                                                                                                                                                                                                                                   |                                                                                                                |                                          |                      | 1.50 (0.50-4.00)   | P trend=0.54                                                                                                                                                                                           |

|                                                                                             |                                                                                                    |                                                                                          |                                                                                                              |                                                                    |                                         |                    |                                  |                                                                                                                                                                                                                          |
|---------------------------------------------------------------------------------------------|----------------------------------------------------------------------------------------------------|------------------------------------------------------------------------------------------|--------------------------------------------------------------------------------------------------------------|--------------------------------------------------------------------|-----------------------------------------|--------------------|----------------------------------|--------------------------------------------------------------------------------------------------------------------------------------------------------------------------------------------------------------------------|
| Rohan <sup>52</sup><br>1993, Diet and Breast Cancer in Australia Follow-up Study, Australia | Follow-up of case-control study (n= 412), mean age: 55.1 years, pre- and post-menopausal           | Diagnosis: 1982-1984, follow-up: 5.5 years, until 1989                                   | Primary breast cancer, stage I-IVE                                                                           | FFQ                                                                | Breast cancer-specific mortality(n=112) | ≥45 vs <20 g/day   | 1.65 (0.73-3.75)<br>P trend=0.62 | Energy intake, Age of menarche, Quetelet Index                                                                                                                                                                           |
| Holmes <sup>34</sup><br>1999, NHS, United States                                            | Population-based cohort study (n= 1982), mean age: 54 years, pre- and postmenopausal               | Diagnosis: 1976-1990, follow-up: 157 months, 378 deaths, 326 from breast cancer          | Invasive breast carcinoma                                                                                    | FFQ, 85 items, up to 2 years after diagnosis                       | All- cause mortality (n=378)            | Q5 vs Q1           | 1.23 (0.89-1.69)<br>P trend=0.29 | Age, diet interval, year of diagnosis, oral contraceptive, postmenopausal hormone use, smoking, age at first birth, number of metastatic lymph nodes, tumour size, BMI, menopausal status, energy intake, caloric intake |
| <b>Monounsaturated Fats</b>                                                                 |                                                                                                    |                                                                                          |                                                                                                              |                                                                    |                                         |                    |                                  |                                                                                                                                                                                                                          |
| Beasley <sup>33</sup><br>2011, CWLS, USA                                                    | Follow up of case-control study (n=4441), age range: 20-79 years, post-menopausal 73%, race: White | Diagnosis: 1998-2001, follow-up: 5.5 years, 525 deaths, 137 from breast cancer, 132 from | Primary invasive breast cancer, local 72.8%, regional 27.2%, surgery 97.9%, chemotherapy 31.9%, radiotherapy | FFQ, 126 items, at 1-16 years after diagnosis (42% within 5 years) | All- cause mortality (n=525)            | 15% vs 8% kcal/day | 1.14 (0.86-1.52)<br>P trend=0.93 | Age, residence, menopausal status, smoking, stage, alcohol intake, hormonal therapy, interval between diagnosis and                                                                                                      |

|                                                                                             |                                                                                         |                                                                                 |                                   |                                              |                                          |                  |                                  |                                                                                                                                                                                                                          |
|---------------------------------------------------------------------------------------------|-----------------------------------------------------------------------------------------|---------------------------------------------------------------------------------|-----------------------------------|----------------------------------------------|------------------------------------------|------------------|----------------------------------|--------------------------------------------------------------------------------------------------------------------------------------------------------------------------------------------------------------------------|
|                                                                                             |                                                                                         | cardiovascular disease                                                          | 49.8%, hormonal therapy 57.8%     |                                              | Breast cancer mortality (n=137)          |                  | 0.89 (0.49-1.6)<br>P trend=0.25  | baseline interview, BMI, physical activity, breast cancer treatment, energy intake                                                                                                                                       |
| Holmes <sup>34</sup><br>1999, NHS, United States                                            | Population-based cohort study (n= 1982), mean age: 54 years, pre- and postmenopausal    | Diagnosis: 1976-1990, follow-up: 157 months, 378 deaths, 326 from breast cancer | Invasive breast carcinoma         | FFQ, 85 items, up to 2 years after diagnosis | All-cause mortality (n=378)              | Q5 vs Q1         | 1.34 (0.96-1.86)<br>P trend=0.60 | Age, diet interval, year of diagnosis, oral contraceptive, postmenopausal hormone use, smoking, age at first birth, number of metastatic lymph nodes, tumour size, BMI, menopausal status, energy intake, caloric intake |
| Rohan <sup>52</sup><br>1993, Diet and Breast Cancer in Australia Follow-up Study, Australia | Follow-up of case-control study (n= 412), mean age: 55.1 years, pre- and postmenopausal | Diagnosis: 1982-1984, follow-up: 5.5 years, until 1989                          | Primary breast cancer, any stages | FFQ                                          | Breast cancer-specific mortality (n=112) | ≥37 vs ≤17 g/day | 1.33 (0.56-3.13)<br>P trend=0.64 | Energy intake, Age of menarche, Quetelet Index                                                                                                                                                                           |

**Polyunsaturated Fat**

|                                         |                                                                                                    |                                                                                                                 |                                                                                                                                            |                                                                    |                                 |                   |                                    |                                                                                                                                                                                                                          |
|-----------------------------------------|----------------------------------------------------------------------------------------------------|-----------------------------------------------------------------------------------------------------------------|--------------------------------------------------------------------------------------------------------------------------------------------|--------------------------------------------------------------------|---------------------------------|-------------------|------------------------------------|--------------------------------------------------------------------------------------------------------------------------------------------------------------------------------------------------------------------------|
| Beasley <sup>33</sup> , 2011, CWLS, USA | Follow up of case-control study (n=4441), age range: 20-79 years, post-menopausal 73%, race: White | Diagnosis: 1998-2001, follow-up: 5.5 years, 525 deaths, 137 from breast cancer, 132 from cardiovascular disease | Primary invasive breast cancer, local 72.8%, regional 27.2%, surgery 97.9%, chemotherapy 31.9%, radiotherapy 49.8%, hormonal therapy 57.8% | FFQ, 126 items, at 1-16 years after diagnosis (42% within 5 years) | All-cause mortality (n=525)     | 8% vs 4% kcal/day | 0.91 (0.70-1.19)<br>P trend=0.41   | Age, residence, menopausal status, smoking, stage, alcohol intake, hormonal therapy, interval between diagnosis and baseline interview, BMI, physical activity, breast cancer treatment, energy intake                   |
|                                         |                                                                                                    |                                                                                                                 |                                                                                                                                            |                                                                    | Breast cancer mortality (n=137) |                   | 0.90 (0.52 - 1.55)<br>P trend=0.33 |                                                                                                                                                                                                                          |
| Holmes <sup>34</sup> 1999, NHS, USA     | Population-based cohort study (n= 1982), mean age: 54 years, pre- and postmenopausal               | Diagnosis: 1976-1990, follow-up: 157 months, 378 deaths, 326 from breast cancer                                 | Invasive breast carcinoma                                                                                                                  | FFQ, 85 items, at up to 2 years after diagnosis                    | All-cause mortality (n=378)     | Q5 vs Q1          | 1.05 (0.77-1.43)<br>P trend=0.57   | Age, diet interval, year of diagnosis, oral contraceptive, postmenopausal hormone use, smoking, age at first birth, number of metastatic lymph nodes, tumour size, BMI, menopausal status, energy intake, caloric intake |

|                                                                  |                                                                                                    |                                                                                                                 |                                                                                                                                            |                                                                          |                                          |                       |                                  |                                                                                                                                                                               |
|------------------------------------------------------------------|----------------------------------------------------------------------------------------------------|-----------------------------------------------------------------------------------------------------------------|--------------------------------------------------------------------------------------------------------------------------------------------|--------------------------------------------------------------------------|------------------------------------------|-----------------------|----------------------------------|-------------------------------------------------------------------------------------------------------------------------------------------------------------------------------|
| Nomura <sup>55</sup><br>1991,<br>HCJFS,<br>USA                   | Prospective cohort of cancer survivors (n=182), age range: 45-74 years, race: White                | Diagnosis: 1975 and 1980, follow-up: 12.5 years                                                                 | In situ 5%, localized 56%, regional 36%, distant 3%                                                                                        | Structured interview, 43 items, at on average 2.2 months after diagnosis | All-cause mortality                      | High vs low           | 1.72 (0.74-4.00)                 | Stage of disease, menopausal status, obesity index, estrogen use                                                                                                              |
| Rohan <sup>52</sup><br>1993,<br>SACCR<br>follow-up,<br>Australia | Follow-up of case-control study (n= 412), mean age: 55.1 years, pre- and postmenopausal            | Diagnosis: 1982-1984, follow-up: 5.5 years, until 1989                                                          | Primary breast cancer, stage I-IV                                                                                                          | FFQ                                                                      | Breast cancer-specific mortality (n=112) | ≥20 vs <7 g/day       | 1.57 (0.78-3.14)<br>P trend=0.31 | Energy intake, Age of menarche, Quetelet Index                                                                                                                                |
| <b>Trans fatty acids</b>                                         |                                                                                                    |                                                                                                                 |                                                                                                                                            |                                                                          |                                          |                       |                                  |                                                                                                                                                                               |
| Beasley <sup>33</sup><br>2011,<br>CWLS, USA                      | Follow up of case-control study (n=4441), age range: 20-79 years, post-menopausal 73%, race: White | Diagnosis: 1998-2001, follow-up: 5.5 years, 525 deaths, 137 from breast cancer, 132 from cardiovascular disease | Primary invasive breast cancer, local 72.8%, regional 27.2%, surgery 97.9%, chemotherapy 31.9%, radiotherapy 49.8%, hormonal therapy 57.8% | FFQ, 126 items, at 1-16 years after diagnosis (42% within 5 years)       | All-cause mortality (n=525)              | 1.6% vs 0.7% kcal/day | 1.78 (1.35-2.32)<br>P trend=0.01 | Age, residence, menopausal status, smoking, stage, alcohol intake, hormonal therapy, interval between diagnosis and baseline interview, BMI, physical activity, breast cancer |
|                                                                  |                                                                                                    |                                                                                                                 |                                                                                                                                            |                                                                          | Breast cancer mortality (n=137)          |                       | 1.42 (0.80-2.52)<br>P trend=0.34 |                                                                                                                                                                               |

|                                                  |                                                                                          |                                                                                                                                 |                                                       |                                                 |                             |                       |                                   |                                                                                                                                                                                                                          |
|--------------------------------------------------|------------------------------------------------------------------------------------------|---------------------------------------------------------------------------------------------------------------------------------|-------------------------------------------------------|-------------------------------------------------|-----------------------------|-----------------------|-----------------------------------|--------------------------------------------------------------------------------------------------------------------------------------------------------------------------------------------------------------------------|
|                                                  |                                                                                          |                                                                                                                                 |                                                       |                                                 |                             |                       |                                   | treatment, energy intake                                                                                                                                                                                                 |
| Holmes <sup>34</sup><br>1999, NHS, United States | Population-based cohort study (n= 1982, mean age: 54 years, pre- and postmenopausal      | Diagnosis: 1976-1990, follow-up: 157 months, 378 deaths, 326 from breast cancer                                                 | Invasive breast carcinoma                             | FFQ, 85 items, at up to 2 years after diagnosis | All-cause mortality (n=378) | Q5 vs Q1              | 1.16 (0.84-1.57)<br>P trend=0.49  | Age, diet interval, year of diagnosis, oral contraceptive, postmenopausal hormone use, smoking, age at first birth, number of metastatic lymph nodes, tumour size, BMI, menopausal status, energy intake, caloric intake |
| <b>EPA DHA</b>                                   |                                                                                          |                                                                                                                                 |                                                       |                                                 |                             |                       |                                   |                                                                                                                                                                                                                          |
| Patterson <sup>57</sup><br>2011, WHEL, USA       | Secondary analysis of clinical trials (n=3081), mean age: 52.7 years, race: mostly White | Diagnosis: 1995-2000, follow-up: 7.3 years, 314 deaths, 261 from breast cancer, 27 from other cancers, 7 from heart disease, 19 | Stage I 38.6%, IIA 5%, ER+ 74.2%, tamoxifen use 59.6% | 24-hour recall                                  | All-cause mortality (n=314) | ≥153 vs ≤ 36.7 mg/day | 0.60 (0.44-0.83)<br>P trend=0.007 | Tumour stage, time from diagnosis to randomization, supplements use, tumour grade                                                                                                                                        |

|                                     |                                                                                      |                                                                                 |                           |                                                 |                             |          |                                  |                                                                                                                                                                                                                          |
|-------------------------------------|--------------------------------------------------------------------------------------|---------------------------------------------------------------------------------|---------------------------|-------------------------------------------------|-----------------------------|----------|----------------------------------|--------------------------------------------------------------------------------------------------------------------------------------------------------------------------------------------------------------------------|
|                                     |                                                                                      | from other causes                                                               |                           |                                                 | Recurrence                  |          | 0.72 (0.57-0.90)<br>P trend=0.06 |                                                                                                                                                                                                                          |
| <b>EPA</b>                          |                                                                                      |                                                                                 |                           |                                                 |                             |          |                                  |                                                                                                                                                                                                                          |
| Holmes <sup>34</sup> 1999, NHS, USA | Population-based cohort study (n= 1982), mean age: 54 years, pre- and postmenopausal | Diagnosis: 1976-1990, follow-up: 157 months, 378 deaths, 326 from breast cancer | Invasive breast carcinoma | FFQ, 85 items, at up to 2 years after diagnosis | All-cause mortality (n=378) | Q5 vs Q1 | 0.71 (0.49-1.00)<br>P trend=0.08 | Age, diet interval, year of diagnosis, oral contraceptive, postmenopausal hormone use, smoking, age at first birth, number of metastatic lymph nodes, tumour size, BMI, menopausal status, energy intake, caloric intake |
| <b>DHA</b>                          |                                                                                      |                                                                                 |                           |                                                 |                             |          |                                  |                                                                                                                                                                                                                          |
| Holmes <sup>34</sup> 1999, NHS, USA | Population-based cohort study (n= 1982), mean age: 54 years, pre- and postmenopausal | Diagnosis: 1976-1990, follow-up: 157 months, 378 deaths, 326 from breast cancer | Invasive breast carcinoma | FFQ, 85 items, at up to 2 years after diagnosis | All-cause mortality (n=378) | Q5 vs Q1 | 0.7 (0.5-0.97)<br>P trend=0.02   | Age, diet interval, year of diagnosis, oral contraceptive, postmenopausal hormone use, smoking, age at first birth, number of metastatic lymph nodes, tumour size, BMI,                                                  |



|                                           |                                                                                      |                                                                                 |                           |                                                 |                              |           |                                                                         |                                                                                                                                                                                                                          |
|-------------------------------------------|--------------------------------------------------------------------------------------|---------------------------------------------------------------------------------|---------------------------|-------------------------------------------------|------------------------------|-----------|-------------------------------------------------------------------------|--------------------------------------------------------------------------------------------------------------------------------------------------------------------------------------------------------------------------|
|                                           |                                                                                      |                                                                                 |                           |                                                 |                              |           |                                                                         | menopausal status, energy intake, caloric intake                                                                                                                                                                         |
| <b>Other polyunsaturated fatty acids</b>  |                                                                                      |                                                                                 |                           |                                                 |                              |           |                                                                         |                                                                                                                                                                                                                          |
| Holmes <sup>34</sup><br>1999, NHS,<br>USA | Population-based cohort study (n= 1982), mean age: 54 years, pre- and postmenopausal | Diagnosis: 1976-1990, follow-up: 157 months, 378 deaths, 326 from breast cancer | Invasive breast carcinoma | FFQ, 85 items, at up to 2 years after diagnosis | All- cause mortality (n=378) | Q5 vs. Q1 | 20:1 fatty acid (eicosanoic)<br>0.78 (0.57 - 1.07)<br><br>P trend=0.007 | Age, diet interval, year of diagnosis, oral contraceptive, postmenopausal hormone use, smoking, age at first birth, number of metastatic lymph nodes, tumour size, BMI, menopausal status, energy intake, caloric intake |
|                                           |                                                                                      |                                                                                 |                           |                                                 |                              |           | 22:5 fatty acid (DPA)<br>0.7 (0.50- 0.97)<br><br>P trend= 0.02          |                                                                                                                                                                                                                          |

Abbreviations: CWLS, Collaborative Women's Longevity Study; DBCCG, Danish Breast Cancer Cooperative Group; HCJFS; Hawaiian Caucasian, Japanese Follow-up Study; NHS, Nurses' Health Study; SACCR, South Australian Central Cancer Registry; SACCR, South Australian Central Cancer Registry; WHEL; Women's Healthy Eating and Living

**Supplementary Table S17. Descriptive table of the included observational studies of post-diagnosis fibre intake and breast cancer prognosis**

| Author, year, study name, country, WCRF Code | Study description                                                                                                  | Time of diagnosis and follow-up                        | Disease characteristics treatment                                                                                                                                                                                                                                   | Exposure assessment                                                          | Outcome (Events)                         | Contrast                  | RR (95% CI)                      | Covariates                                                                                                                                                                                             |
|----------------------------------------------|--------------------------------------------------------------------------------------------------------------------|--------------------------------------------------------|---------------------------------------------------------------------------------------------------------------------------------------------------------------------------------------------------------------------------------------------------------------------|------------------------------------------------------------------------------|------------------------------------------|---------------------------|----------------------------------|--------------------------------------------------------------------------------------------------------------------------------------------------------------------------------------------------------|
| Pierce <sup>11</sup> 2007, WHEL, USA         | Randomised controlled trial (n= 1490), mean age 50 years, pre- and post-menopausal                                 | Diagnosis: 1991-2000, follow-up: 6.7 years, until 2005 | Stage I 40%, II 45%, III 15%, grade I 15.9%, II 39.8%, III 35.8%, unknown 8.3%, ER+/PR+ 63.1%, ER+/PR- 10.8%, ER-/PR+ 5.1%, ER-/PR- 20.8%, none-chemotherapy 31.4%, non-anthracycline 25.7%, anthracycline 42.8%, adjuvant tamoxifen 42%, no adjuvant tamoxifen 58% | 24-hr food recall, questionnaire, at on average 20 months post-diagnosis     | All-cause mortality (n=135)              | 23.5-59.7 vs 5.1-15.6 g/d | 0.61<br>P trend=0.12             | Unadjusted                                                                                                                                                                                             |
| Beasley <sup>33</sup> 2011, CWLS, USA        | Follow up of cases of case-control study (n=4441), age range: 20-79 years, post-menopausal 73%, race: mostly White | Diagnosis: 1998-2001, follow-up: 5.5 years             | Primary invasive breast cancer, local 72.8%, regional 27.2%, surgery 97.9%, chemotherapy 31.9%, radiotherapy 49.8%, hormonal therapy 57.8%                                                                                                                          | Validated FFQ, 126 items, at 1-16 years after diagnosis (42% within 5 years) | All-cause mortality (n=525)              | 30 vs 11 g/d              | 0.75 (0.52-1.09)<br>P trend=0.17 | Age, residence, menopausal status, smoking, stage, alcohol intake, hormonal therapy, interval between diagnosis and baseline interview, BMI, physical activity, breast cancer treatment, energy intake |
|                                              |                                                                                                                    |                                                        |                                                                                                                                                                                                                                                                     |                                                                              | Breast cancer-specific mortality (n=137) |                           | 0.75 (0.38-1.49)<br>P trend=0.24 |                                                                                                                                                                                                        |
| Belle <sup>51</sup> 2011, HEAL, USA          | Prospective cohort of cancer survivors                                                                             | Diagnosis: 1995-1998, follow-up: 6.7 years, until 2004 | Invasive, stage 0-III A                                                                                                                                                                                                                                             | FFQ, 122 items                                                               | All-cause mortality (n=106)              | >16.3 vs <10.3 g/d        | 0.75 (0.43-1.31)<br>P trend=0.94 | Energy intake, folate intake, physical activity, tumour stage,                                                                                                                                         |

| Author, year, study name, country, WCRF Code | Study description                                                                        | Time of diagnosis and follow-up                         | Disease characteristics treatment | Exposure assessment            | Outcome (Events)                                                                                                                                   | Contrast | RR (95% CI)                                                                                                                                  | Covariates                                                                                                                                                                                                                                                                                                                                                                                    |
|----------------------------------------------|------------------------------------------------------------------------------------------|---------------------------------------------------------|-----------------------------------|--------------------------------|----------------------------------------------------------------------------------------------------------------------------------------------------|----------|----------------------------------------------------------------------------------------------------------------------------------------------|-----------------------------------------------------------------------------------------------------------------------------------------------------------------------------------------------------------------------------------------------------------------------------------------------------------------------------------------------------------------------------------------------|
|                                              | (n=688), mean age: 55.3 years                                                            |                                                         |                                   |                                | Breast cancer-specific mortality (n=83)<br>Recurrence (n=82)                                                                                       |          | 0.85 (0.46-1.59)<br>P trend=0.55<br>0.84 (0.45-1.57)<br>P trend=0.53                                                                         | treatment, tamoxifen use                                                                                                                                                                                                                                                                                                                                                                      |
| Holmes <sup>58</sup> 2009 NHS, USA           | Population-based cohort study (n=3846), age range: 30-55 years, pre- and post-menopausal | Diagnosis: 1976-2001, follow-up: 321 months, until 2006 | Stage I-III                       | FFQ, at 2 years post-diagnosis | All-cause mortality, cereal fibre<br>Breast cancer mortality, cereal fibre (n=446)<br>Breast cancer mortality, ER+<br>Breast cancer mortality, ER- | Q5 vs Q1 | 0.71 (0.53-0.96)<br>P trend=0.03<br>1.00 (0.71-1.40)<br>P trend=0.59<br>1.04 (0.70-1.55)<br>P trend=0.98<br>0.59 (0.17-2.05)<br>P trend=0.35 | Age, time between exposure assessment and cancer diagnosis, year of diagnosis oral contraceptive hormonal therapy, smoking, age at first birth, nodal status, tumor size, BMI, menopausal status, energy intake, dietary factors, BMI change, age at first birth and parity, stage of disease, radiation treatment, chemotherapy and hormonal treatment, date of diagnosis, physical activity |

| Author, year, study name, country, WCRF Code          | Study description                                                            | Time of diagnosis and follow-up                                                 | Disease characteristics treatment                                                                                                                                                                                | Exposure assessment                                                  | Outcome (Events)                                         | Contrast           | RR (95% CI)                       | Covariates                                                                                                                                                                                                                                                                                                        |
|-------------------------------------------------------|------------------------------------------------------------------------------|---------------------------------------------------------------------------------|------------------------------------------------------------------------------------------------------------------------------------------------------------------------------------------------------------------|----------------------------------------------------------------------|----------------------------------------------------------|--------------------|-----------------------------------|-------------------------------------------------------------------------------------------------------------------------------------------------------------------------------------------------------------------------------------------------------------------------------------------------------------------|
| Borugian <sup>53</sup><br>2004,<br>VCCBCCA,<br>Canada | Prospective cohort of breast cancer survivors (n= 603), mean age: 54.5 years | Recruitment: 1991-1992, follow-up: 10 years, 146 deaths, 112 from breast cancer | Well differentiated 7.6%, moderately differentiated 46.4%, poorly differentiated 46%, ER+ 76.4%, chemotherapy only 14.7%, tamoxifen only 21.9%, chemotherapy and tamoxifen 21.4%, other hormone 1.9%, none 40.1% | Questionnaire, self-administered, after surgery and before treatment | Breast cancer-specific mortality (n=112)                 | Q4 vs Q1           | 0.7 (0.4-1.3)<br>P trend=0.34     | Age, total caloric intake, and stage at diagnosis                                                                                                                                                                                                                                                                 |
|                                                       |                                                                              |                                                                                 |                                                                                                                                                                                                                  |                                                                      | Breast cancer-specific mortality, premenopausal (n=235)  |                    | 0.7 (0.2-1.6)<br>P trend=0.26     |                                                                                                                                                                                                                                                                                                                   |
|                                                       |                                                                              |                                                                                 |                                                                                                                                                                                                                  |                                                                      | Breast cancer-specific mortality, postmenopausal (n=368) |                    | 0.8 (0.3-1.8)<br>P trend=0.74     |                                                                                                                                                                                                                                                                                                                   |
| Farvid <sup>48</sup> 2021, NHS I and II, USA          | Population-based cohort study (n=8932), age range: 30-55 years               | Diagnosis: 1980-2010, 1991-2011                                                 | Stage I-III                                                                                                                                                                                                      | FFQ                                                                  | All-cause mortality (n=2523)                             | 27.3 vs 13.7 g/day | 0.85 (0.75-0.97)<br>P trend=0.004 | Age at diagnosis, age at menopause, alcohol intake, aspirin use, BMI change, calendar year, chemotherapy, energy intake, er/pr status, hormonal therapy, menopausal status, physical activity, prediagnosis BMI, race, radiotherapy, smoking, stage, study, time between cancer diagnosis and exposure assessment |
|                                                       |                                                                              |                                                                                 |                                                                                                                                                                                                                  |                                                                      | Cancer specific mortality (n=1071)                       |                    | 0.95 (0.78-1.16)<br>P trend=0.52  |                                                                                                                                                                                                                                                                                                                   |

| Author, year, study name, country, WCRF Code         | Study description                                                                     | Time of diagnosis and follow-up                         | Disease characteristics treatment         | Exposure assessment                                                              | Outcome (Events)                                                               | Contrast         | RR (95% CI)                       | Covariates                                                                                                                                                                                                                                                                                                                                                                                                                              |
|------------------------------------------------------|---------------------------------------------------------------------------------------|---------------------------------------------------------|-------------------------------------------|----------------------------------------------------------------------------------|--------------------------------------------------------------------------------|------------------|-----------------------------------|-----------------------------------------------------------------------------------------------------------------------------------------------------------------------------------------------------------------------------------------------------------------------------------------------------------------------------------------------------------------------------------------------------------------------------------------|
| Holmes <sup>34</sup> 1999, NHS, USA                  | Population-based cohort study (n=1982), mean age 54 years, pre- and postmenopausal    | Diagnosis: 1976-1990, follow-up: 157 months, until 1994 | Invasive, grade 1-3                       | Validated FFQ in 1980, 1984, 1986, and 1990                                      | All-cause mortality (n=238) (Result superseded by Farvid <sup>48</sup> , 2021) | >20 vs ≤12.5 g/d | 0.77 (0.47-1.25)<br>P trend=0.37  | Age, time between exposure assessment and cancer diagnosis, year of diagnosis, oral contraceptive, hormonal therapy, family history, smoking, age at first birth and parity, age at menarche, nodal status, tumour size, tumour grade, number of metastatic lymph nodes, BMI, menopausal status, energy intake, dietary factors, nulliparous, oestrogen receptor (positive vs negative)<br>Progesterone receptor (positive vs negative) |
|                                                      |                                                                                       |                                                         |                                           |                                                                                  | Nonmetastatic All-cause mortality (n=128)                                      |                  | 0.59 (0.33-1.08)<br>P trend=0.04  |                                                                                                                                                                                                                                                                                                                                                                                                                                         |
|                                                      |                                                                                       |                                                         |                                           |                                                                                  | Metastatic All-cause mortality (n=250)                                         |                  | 0.69 (0.45-1.05)<br>P trend=0.13  |                                                                                                                                                                                                                                                                                                                                                                                                                                         |
| Rohan <sup>52</sup> 1993, SACCR follow-up, Australia | Follow-up of case-control study (n=412), mean age 55.1 years, pre- and postmenopausal | Follow up=5.5 years median                              | Invasive primary breast cancer, any stage | Interview by trained interviewer at home. Average interval between diagnosis and | Breast cancer-specific mortality (n=112)                                       | ≥27 vs. ≤13 g/d  | 0.87 (0.45-1.68)<br>P trend=0.812 | Energy intake, age of menarche, quetelet index                                                                                                                                                                                                                                                                                                                                                                                          |

| Author, year, study name, country, WCRF Code | Study description | Time of diagnosis and follow-up | Disease characteristics treatment | Exposure assessment                                                                                                                                        | Outcome (Events) | Contrast | RR (95% CI) | Covariates |
|----------------------------------------------|-------------------|---------------------------------|-----------------------------------|------------------------------------------------------------------------------------------------------------------------------------------------------------|------------------|----------|-------------|------------|
|                                              |                   |                                 |                                   | interview was 4.8 months. Usual dietary intake was collected with a self-administered quantitative validated FFQ that assessed 179 specified dietary items |                  |          |             |            |

Abbreviations: CWLS, Collaborative Women's Longevity Study; HEAL, Health, Eating, Activity, and Lifestyle Study; NHS, Nurses' Health Study; SACCR, South Australian Central Cancer Registry; WHEL; Women's Healthy Eating and Living

**Supplementary Table S18. Descriptive table of the included observational studies of post-diagnosis alcohol intake and breast cancer prognosis**

| Author, year, study name, country, WCRF Code | Study description                                         | Time of diagnosis and follow-up                                                                                                                | Disease characteristics treatment                                                                                                                                                               | Exposure assessment                                                                                                         | Outcome (Events)                                    | Contrast                                                       | RR (95% CI)                          | Covariates                                                             |
|----------------------------------------------|-----------------------------------------------------------|------------------------------------------------------------------------------------------------------------------------------------------------|-------------------------------------------------------------------------------------------------------------------------------------------------------------------------------------------------|-----------------------------------------------------------------------------------------------------------------------------|-----------------------------------------------------|----------------------------------------------------------------|--------------------------------------|------------------------------------------------------------------------|
| Schmidt <sup>59</sup> G, 2020, Germany,      | Female (n=197), premenopausal 29.4%, postmenopausal 70.6% | Follow Up: Median 41.43 months                                                                                                                 | Triple-negative breast cancer. Grade G1 1%, G2 29.5%, G3 66.5%.<br>Neoadjuvant chemotherapy 42.7%, pcr after neoadjuvant chemotherapy 40.5%, adjuvant chemotherapy 44.1%, no chemotherapy 13.2% | Registry database of during diagnosis                                                                                       | Overall survival                                    | Consumption vs No consumption                                  | Log rank test<br>P value =0.65       | NULL                                                                   |
|                                              |                                                           |                                                                                                                                                |                                                                                                                                                                                                 |                                                                                                                             | Disease free survival                               | Consumption vs No consumption                                  | Log rank test<br>p-value = 0.75      | NULL                                                                   |
| Furrer <sup>60</sup> D, 2018, CMSDF, Canada, | Female Historical cohort (n=236)                          | Follow Up: Median 7.4 years, Six patients died from causes other than breast cancer 66 (28.0%) of 236 patients experienced disease recurrence. | GRADE: grade I/II= 86; grade III=149; unknown=1<br>STAGE: stage I=60; stage II=106; stage III=70<br>Radiotherapy no=35; yes=201                                                                 | Self-administered Questionnaire before diagnosis, at and during trastuzumab treatment of diagnosis July 2005 to August 2016 | During trastuzumab treatment<br>Disease-free (n=34) | >2 vs 0-2 drinks/week of wine<br>>2 vs 0-2 drinks/week of beer | 0.68 (0.30-1.56)<br>0.55 (0.23-1.23) | Adjuvant endocrine therapy, age at diagnosis, BMI, radiotherapy, stage |



| Author, year, study name, country, WCRF Code | Study description                                                                                                      | Time of diagnosis and follow-up                                                                                                                                | Disease characteristics treatment        | Exposure assessment                                                               | Outcome (Events)                     | Contrast                                | RR (95% CI)        | Covariates                                                                                                                                                                                                                                                                                  |
|----------------------------------------------|------------------------------------------------------------------------------------------------------------------------|----------------------------------------------------------------------------------------------------------------------------------------------------------------|------------------------------------------|-----------------------------------------------------------------------------------|--------------------------------------|-----------------------------------------|--------------------|---------------------------------------------------------------------------------------------------------------------------------------------------------------------------------------------------------------------------------------------------------------------------------------------|
|                                              |                                                                                                                        |                                                                                                                                                                |                                          | (end of study period)                                                             |                                      |                                         | 1.98 (0.53-7.33)   |                                                                                                                                                                                                                                                                                             |
| Knight <sup>61</sup> , 2017, WECARE, USA     | Population-based case-control study<br>Female (n=3431)<br>mean age:46,<br>Cancer<br>Diagnosis: 1985-2008, Mostly White | Diagnosed:1985-2008                                                                                                                                            | Invasive breast cancer stage I-III       | Interview                                                                         | Contralateral breast cancer (n=1521) | Any drinking - Yes vs Any drinking - No | 1.15 (0.98-1.34)   | Age at diagnosis, age at menarche, BMI at diagnosis, chemotherapy, er status, family history, histology, hormonal therapy, number of full-term pregnancies, radiotherapy, smoking, tumor stage                                                                                              |
| Veal <sup>62</sup> , 2017 WISC USA           | Cohort of women with an incident primary DCIS diagnosis reported to the Wisconsin Cancer Reporting System (n= 1925)    | Reported diagnosis 1997-2006<br>Follow up= 6.7 years, until 2012<br>Death (n=196) including 87 cancer deaths, 34 CVD deaths, and 75 deaths due to other causes | DCIS                                     | Interview, Baseline questionnaire collected median 1.3 years after DCIS diagnosis | All-cause mortality (n=196)          | ≥7 vs. 0 drinks/ week                   | 1.03 (0.47 - 2.27) | Age at diagnosis, family history of breast cancer, education, surgical treatment type, year of diagnosis, post-treatment endocrine therapy use, comorbidity, post-menopausal hormone use, remaining exposures as time-varying covariates, pre-diagnosis exposure level as static covariates |
| Nakamura <sup>63</sup> , 2017 Biobank Japan  | Follow-up study of cancer survivor's cohort (n= 1860)                                                                  | 2003-2008<br>Follow up= 7.8 years<br>Total death (n=218)                                                                                                       | - In situ:226<br>-Invasive:1414<br>75.8% | Questionnaire , 90 days after the diagnosis                                       | All-cause mortality(n=215)           | Ever (current/former) vs. never         | 1.06 (0.75 - 1.52) | Age at study entry, entry year                                                                                                                                                                                                                                                              |

| Author, year, study name, country, WCRF Code    | Study description                                                                   | Time of diagnosis and follow-up                                            | Disease characteristics treatment                                                                                                                                                             | Exposure assessment        | Outcome (Events)                                                         | Contrast              | RR (95% CI)                                                      | Covariates                                                                                                     |
|-------------------------------------------------|-------------------------------------------------------------------------------------|----------------------------------------------------------------------------|-----------------------------------------------------------------------------------------------------------------------------------------------------------------------------------------------|----------------------------|--------------------------------------------------------------------------|-----------------------|------------------------------------------------------------------|----------------------------------------------------------------------------------------------------------------|
|                                                 | Mean age:55.3<br>Calendar year:<br>2003-2008 until<br>2014                          |                                                                            | -ER+, 24.2% ER-, 62.1%; PR+, 37.9% PR-<br>-10.9% stage 0, 47.9% stage I, 31.3% stage IIA, 5.8% stage IIB, 1.4% stage IIIA, 1.1% stage IIIB, 0.3% stage IIIC, 0.8% stage IV, 0.5% unclassified |                            |                                                                          |                       |                                                                  |                                                                                                                |
| Wu <sup>64</sup> , 2017<br>UTS (UTMDACC)<br>USA | Cohort (n=15 314)<br>Postmenopausal, premenopausal, perimenopausal<br>Mean age:54.5 | 1997-2012<br>Follow up= 7.95 years<br>Recurrence (n=684)<br>Death (n=1095) | Diagnosed with stage I to III<br>Histology according to (AJCC)<br>-Ductal (n=7799)<br>-Lobular (n=916)<br>-Mixed Ductal/Lobular (n=676)<br>-Other (n=496)                                     | Within a year of diagnosis | All-cause mortality (n=711)<br><br>Recurrence (n=730)                    | Yes vs. no            | 0.75 (0.65 - 0.87)<br><br>0.71 (0.62 - 0.83)                     |                                                                                                                |
| Lowry <sup>65</sup> , 2016<br>WHI<br>USA        | Cohort of postmenopausal women (n= 7835)                                            | Follow up= 7.9 years                                                       |                                                                                                                                                                                               | Questionnaire              | Breast cancer mortality(n=270)<br>ER- breast cancer<br>ER+ breast cancer | ≥7 vs. 0 drinks/ week | 0.93 (0.40 - 2.14)<br><br>0.49 (0.25– 0.98)<br>0.86 (0.48– 1.54) | Age, Income, Race, study, family history of breast cancer, smoking status, Menopausal Hormone therapy use, BMI |

| Author, year, study name, country, WCRF Code                                                  | Study description                                                                                                                                      | Time of diagnosis and follow-up                                                                                                                                                                                                                                          | Disease characteristics treatment                                                                                                                                                                     | Exposure assessment | Outcome (Events)                                                             | Contrast                                               | RR (95% CI)                                               | Covariates                                                                                                                                                                                                                                                                                |
|-----------------------------------------------------------------------------------------------|--------------------------------------------------------------------------------------------------------------------------------------------------------|--------------------------------------------------------------------------------------------------------------------------------------------------------------------------------------------------------------------------------------------------------------------------|-------------------------------------------------------------------------------------------------------------------------------------------------------------------------------------------------------|---------------------|------------------------------------------------------------------------------|--------------------------------------------------------|-----------------------------------------------------------|-------------------------------------------------------------------------------------------------------------------------------------------------------------------------------------------------------------------------------------------------------------------------------------------|
|                                                                                               | Calendar year: Recruitment 1991                                                                                                                        |                                                                                                                                                                                                                                                                          |                                                                                                                                                                                                       |                     | All-cause mortality(n=606)<br><br>ER- breast cancer<br><br>ER+ breast cancer |                                                        | 0.54(0.32-0.91)<br><br>0.54(0.32-0.89)<br>0.89(0.65-1.22) |                                                                                                                                                                                                                                                                                           |
| Nechuta <sup>66</sup> , 2016<br>ABCP<br>USA and China<br>(Reputed results with ER+/- status ) | Pooled analysis (prospective cohort) (n= 6596)<br>Mixed age range:20-83<br><br>calendar year: 1976 and 2004<br><br>Year of diagnosis, range: 1990–2004 | Follow up= 10 years 49% of deaths=due to breast cancer, 17%=other cancers, 13%=CVD and 21%=other causes Total deaths=1,427; Total recurrence=1,309 Disease-free survival: 92.7% at 5 years, 84.9% at 10 years. Overall survival: 96.7% at 5 years and 86.6% at 10 years. | Women diagnosed with invasive breast cancer<br>Chemotherapy, n (%) = 3,046 (46.2);<br>Radiotherapy, n (%) =4,063 (61.6);<br>Mastectomy, n (%) =3,203 (48.6);<br>Hormonal therapy, n (%) =5,689 (86.3) | FFQ                 | late recurrence (≥5 years) (n=593) ER positive                               | ≥12 (>1 drinks/day) vs. non-drinker (0 to 0.36) g/ day | 1.28 (1.01-1.62)<br><br>P trend=0.06                      | Age at diagnosis, TNM stage, PR status, chemotherapy, radiotherapy, Surgery, Hormonal therapy, race/ethnicity, menopausal status, Comorbidity, time between exposure measurement and 5-year post-diagnosis date, stratified by study, pre-diagnosis BMI, Exercise, Weight change, smoking |
|                                                                                               |                                                                                                                                                        |                                                                                                                                                                                                                                                                          |                                                                                                                                                                                                       |                     | Early recurrence (n=396)                                                     |                                                        | 0.87 (0.62-1.23)<br><br>P trend=0.73                      |                                                                                                                                                                                                                                                                                           |

| Author, year, study name, country, WCRF Code       | Study description                                        | Time of diagnosis and follow-up                    | Disease characteristics treatment                                                                                                                                                                                                                                                                                                                               | Exposure assessment                | Outcome (Events)                                                   | Contrast                  | RR (95% CI)        | Covariates                                             |
|----------------------------------------------------|----------------------------------------------------------|----------------------------------------------------|-----------------------------------------------------------------------------------------------------------------------------------------------------------------------------------------------------------------------------------------------------------------------------------------------------------------------------------------------------------------|------------------------------------|--------------------------------------------------------------------|---------------------------|--------------------|--------------------------------------------------------|
|                                                    |                                                          |                                                    |                                                                                                                                                                                                                                                                                                                                                                 |                                    | late all-cause mortality (≥5 years) (n=593)<br>ER positive (n=163) |                           | 0.93 (0.75-1.17)   |                                                        |
| Larsen <sup>67</sup> , 2015<br>DCHS<br><br>Denmark | (n= 1229)<br>Postmenopausal<br><br>Age range:50-64 years | December 1993-May 1997<br><br>Follow up= 9.6 years | - Stage: 1: 496 (40%); Stage 2: 612 (50%); Stage 3: 19 (2%); Missing: 102 (8%)<br>-Tumour Size (mm): ≤ 20: 740 (60%); 21-50: 361 (29%); ≥51: 104 (8%)<br>-Oestrogen receptor status: +ve: 928 (76%); -ve: 196 (16%); Missing: 105 (9%)<br>-Malignancy grade: 1: 333 (27%); 2: 358 (29%); 3: 178 (14%); Non-classified/non-ductal: 236 (19%); Missing: 124 (10%) | FFQ                                | All-cause mortality (number of death is not reported)              | > 14 vs. 1-14 drinks/week | 1.03(0.71-1.50)    | Age, Charlson Comorbidity Index                        |
| Simonsson <sup>68</sup> , 2014<br>Swedish Cohort   | Prospective cohort (n= 1045)                             | Follow up=3 years 76 deaths, 65                    | -In situ:0<br>-Invasive:255                                                                                                                                                                                                                                                                                                                                     | Questionnaire , 1045 patients were | Recurrence (n=100)                                                 | > 10 vs. 0 drinks/week    | 0.70 (0.21 - 2.32) | Age at diagnosis, Tumour size, lymph node involvement, |

| Author, year, study name, country, WCRF Code  | Study description                                                                                                                                  | Time of diagnosis and follow-up                         | Disease characteristics treatment                                                                                                                                                         | Exposure assessment                                                                                    | Outcome (Events)                                         | Contrast                               | RR (95% CI)                                                                      | Covariates                                                              |
|-----------------------------------------------|----------------------------------------------------------------------------------------------------------------------------------------------------|---------------------------------------------------------|-------------------------------------------------------------------------------------------------------------------------------------------------------------------------------------------|--------------------------------------------------------------------------------------------------------|----------------------------------------------------------|----------------------------------------|----------------------------------------------------------------------------------|-------------------------------------------------------------------------|
| Sweden                                        | Mean age:60.9<br>Calendar year: October 2002-December 2011,                                                                                        | distant metastases, 100 breast cancer events            | - ER+ 813, PgR+ 656, ER + PgR+ 650, ER + PgR- 163, ER-PgR- 113, ER-PgR+ 6<br>-Tumour size 1 (n=679), 2 (n=238), 3 (n=15), 4 (n=2), invasive (n=255)<br>-No preoperative treatment (n=934) | included in the study at the time of diagnosis, and were followed until December 31 <sup>st</sup> 2012 |                                                          |                                        |                                                                                  | Tumour grade, ER status, BMI, current smoking, Treatment,               |
| Williams <sup>32</sup> , 2014, NRWHS, USA     | Cohort of breast cancer survivors FROM the National Runners' and Walkers' Health Surveys (n= 986)                                                  | Follow up= 9.1 years<br>Death from breast cancer (n=46) |                                                                                                                                                                                           | Questionnaire                                                                                          | Breast cancer mortality (n=46)                           | Per g/day                              | 0.98(0.94-1.01)                                                                  | Age, race, exercise                                                     |
| Ali <sup>69</sup> , 2014 SEARCH Multi-country | Pooled analysis of prospective case-cohort studies (n= 29 239), of which only SEARCH cohort included Postmenopausal, premenopausal, perimenopausal | Follow up= 6 years, 55,684 person-years.                |                                                                                                                                                                                           | self-administered questionnaire                                                                        | Breast cancer mortality (n=765)<br><br>ER- breast cancer | 1 unit/week<br><br>>14 vs. 0 unit/week | 0.93(0.85-1.01)<br><br>0.86(0.63-1.18)<br><br>0.81(0.69-0.96)<br>0.98(0.89-1.09) | Stage, grade, ER status, BMI, smoking status, SES and menopausal status |

| Author, year, study name, country, WCRF Code    | Study description                                                           | Time of diagnosis and follow-up | Disease characteristics treatment                                                                                                                                                                                                                                                                                  | Exposure assessment | Outcome (Events)                                                                               | Contrast            | RR (95% CI)                                                                                   | Covariates                                                                                                                                                                                                                                     |
|-------------------------------------------------|-----------------------------------------------------------------------------|---------------------------------|--------------------------------------------------------------------------------------------------------------------------------------------------------------------------------------------------------------------------------------------------------------------------------------------------------------------|---------------------|------------------------------------------------------------------------------------------------|---------------------|-----------------------------------------------------------------------------------------------|------------------------------------------------------------------------------------------------------------------------------------------------------------------------------------------------------------------------------------------------|
|                                                 |                                                                             |                                 |                                                                                                                                                                                                                                                                                                                    |                     | ER+ breast cancer                                                                              |                     |                                                                                               |                                                                                                                                                                                                                                                |
|                                                 |                                                                             |                                 |                                                                                                                                                                                                                                                                                                                    |                     | All-cause mortality (n=945)                                                                    | >14 vs. 0 unit/week | 0.77 (0.58-1.03)                                                                              |                                                                                                                                                                                                                                                |
|                                                 |                                                                             |                                 |                                                                                                                                                                                                                                                                                                                    |                     | ER-                                                                                            |                     | 0.77 (0.66-0.90)                                                                              |                                                                                                                                                                                                                                                |
|                                                 |                                                                             |                                 |                                                                                                                                                                                                                                                                                                                    |                     | ER+                                                                                            |                     | 0.95 (0.87-1.04)                                                                              |                                                                                                                                                                                                                                                |
| Kwan <sup>70</sup> , 2013, ABCPP, Multi-country | Pooling study of 3 prospective cohort studies in US (n= 9329) Mean age:58.8 | 1990-2006 Follow up=10.3 years  | -AJCC stage: I: 51.3%, II: 37.1%; III: 11.6%<br>-Hormone receptor status: ER+/PR+: 65.2%; ER-/PR+: 3.1%; ER+/PR-: 14.8%; ER-/PR-: 16.9%<br>-Chemotherapy: No: 47.9%; Yes: 52.1%<br>-Radiation therapy: No: 38.9%; Yes: 61.1%<br>-Hormonal therapy: No: 26.2%; Yes: 73.8%<br>-Surgery type: none: 0.2%; lumpectomy: | FFQ                 | All-cause mortality (n=1542)<br><br>Breast cancer mortality (n=911)<br><br>Recurrence (n=1487) | ≥24 vs <0.36 g/day  | 0.79 (0.63-1.00)<br>P trend=0.06<br>0.80 (0.59 - 1.09)<br>P trend=0.29<br><br>1.04(0.84-1.31) | Age at diagnosis, AJCC stage, race/ethnicity, education, menopausal status at diagnosis, Hormone receptor status, Surgery, Treatment, smoking, Physical activity, pre-diagnosis BMI, Comorbidity<br><br>Included in high vs. low analysis only |

| Author, year, study name, country, WCRF Code                                                                                                | Study description                                                                                                                                  | Time of diagnosis and follow-up                      | Disease characteristics treatment                                                                                                                                                         | Exposure assessment | Outcome (Events)                                                                                    | Contrast                                                                                                                             | RR (95% CI)                                                                    | Covariates                                                                                                                                                                                                                                               |
|---------------------------------------------------------------------------------------------------------------------------------------------|----------------------------------------------------------------------------------------------------------------------------------------------------|------------------------------------------------------|-------------------------------------------------------------------------------------------------------------------------------------------------------------------------------------------|---------------------|-----------------------------------------------------------------------------------------------------|--------------------------------------------------------------------------------------------------------------------------------------|--------------------------------------------------------------------------------|----------------------------------------------------------------------------------------------------------------------------------------------------------------------------------------------------------------------------------------------------------|
|                                                                                                                                             |                                                                                                                                                    |                                                      | 50.6%;<br>mastectomy:<br>49.2%                                                                                                                                                            |                     |                                                                                                     |                                                                                                                                      |                                                                                |                                                                                                                                                                                                                                                          |
| Newcomb <sup>71</sup> , 2013<br><br>Collaborative Women's Longevity Study (CWLS)<br><br>USA                                                 | A survivorship cohort of The Collaborative Breast Cancer Study (CBCS), population-based case-control study of risk factors                         | Follow up=11.3 years<br><br>3484 breast cancer death |                                                                                                                                                                                           | Questionnaire       | Breast cancer mortality (n=276)                                                                     | ≥10 vs 0 drinks/week of total alcohol<br>≥7 vs 0 drinks/week of wine<br>≥7 vs 0 drinks/week of beer<br>≥7 vs 0 drinks/week of spirit | 0.83(0.45-1.54)<br>1.45 (0.77-2.73)<br>0.94 (0.37-2.39)<br>0.83 (0.43-1.62)    | Age at diagnosis, stage of disease at diagnosis, state of residence at diagnosis, study phase, family history of breast cancer, age at first birth, menopausal status, hormone therapy use, BMI, weight change, smoking status, education<br>mammography |
| Beasley <sup>33</sup> , 2011<br>CWLS,<br><br>USA<br>(Included in the analysis)<br><br>(Results superseded by Newcomb <sup>71</sup> , 2013,) | Follow up of cases of population-based case-control studies (n= 4441)<br><br>Mixed age range:20-79 years<br><br>Calendar year:1998-2001 until 2005 | Follow up= 5.5 years                                 | In situ:0 -<br>Invasive:4441<br>Primary invasive breast cancer;<br>Stages: 72.8% local, 27.2% Regional<br>Surgery: 97.9% yes;<br>Radiotherapy: 49.8% yes;<br>Hormonal therapy: 57.8% yes; | FFQ                 | All-cause mortality (n=525)<br><br>Breast cancer mortality(n=137)<br>Breast cancer mortality(n=112) | 15 vs. 0% E from alcohol<br><br>≥10 vs. 0 g                                                                                          | 0.78(0.60-1.01)<br><br>1.27 (0.76–2.14)<br>0.86 (0.51 - 1.47)<br>P trend=0.458 | Age, residence, menopausal status, smoking, stage, alcohol intake, Hormonal therapy, interval between diagnosis and baseline interview, BMI, Physical activity, breast cancer treatment, Energy intake                                                   |

| Author, year, study name, country, WCRF Code                                   | Study description                                                                                    | Time of diagnosis and follow-up                                                                                                                                                              | Disease characteristics treatment                                                                                                                                                                                                                                                                                                                                                          | Exposure assessment             | Outcome (Events)            | Contrast                             | RR (95% CI)                          | Covariates                                                                                                  |
|--------------------------------------------------------------------------------|------------------------------------------------------------------------------------------------------|----------------------------------------------------------------------------------------------------------------------------------------------------------------------------------------------|--------------------------------------------------------------------------------------------------------------------------------------------------------------------------------------------------------------------------------------------------------------------------------------------------------------------------------------------------------------------------------------------|---------------------------------|-----------------------------|--------------------------------------|--------------------------------------|-------------------------------------------------------------------------------------------------------------|
|                                                                                |                                                                                                      |                                                                                                                                                                                              | Chemotherapy: 31.9% yes                                                                                                                                                                                                                                                                                                                                                                    |                                 |                             |                                      |                                      |                                                                                                             |
| Allin <sup>72</sup> , 2011, Denmark                                            | (n= 2910)<br>Age range:26-99                                                                         | 2002-2009                                                                                                                                                                                    |                                                                                                                                                                                                                                                                                                                                                                                            | self-administered questionnaire | All-cause mortality(n=383)  | >168 vs. ≤ 168 g of alcohol per week | 0.79 (0.53-1.19)                     |                                                                                                             |
| Kwan <sup>73</sup> M, 2010 LACE<br><br>(Superseded by Kwan <sup>70</sup> 2013) | Prospective cohort of breast cancer survivors (n=1897) Mixed age range: 1870 calendar year:2000-2002 | 1997-2000<br>Follow up= 7.4 years<br><br>293 breast cancer recurrences<br><br>273 total death, 154 breast cancer deaths 24 to other cancers, 32 to cardiovascular causes 63 to other causes, | Among those with data:15.6% ER-ve/PR-ve, 1.86% ER-ve/PR+ve, 14.7% ER+ve/PR-ve, 67.7% ER+ve/PR+ve<br>Invasive breast cancer; among those with data: 47.7% stage I, 32.6% stage IIA, 16.6% stage IIB, 3.06% stage IIIA<br>Surgery: 50.1% conserving, 49.8% mastectomy;<br>None treatment: 17.4%;<br>Chemotherapy only: 19.5%;<br>Radiation only: 25.9%; Both radian and chemotherapy: 37.1%; | FFQ                             | All-cause mortality (n=273) | ≥6 vs. none g/ day                   | 1.19 (0.87-1.62)<br><br>P trend=0.23 | Age at diagnosis, BMI, Folate intake, Tumour stage, Receptor status, Tamoxifen use, Treatment, Nodal status |



| Author, year, study name, country, WCRF Code                                                 | Study description                                                                                                              | Time of diagnosis and follow-up                                                    | Disease characteristics treatment                                                                                                                                        | Exposure assessment | Outcome (Events)                                                 | Contrast                            | RR (95% CI)                              | Covariates                                                                                                                        |
|----------------------------------------------------------------------------------------------|--------------------------------------------------------------------------------------------------------------------------------|------------------------------------------------------------------------------------|--------------------------------------------------------------------------------------------------------------------------------------------------------------------------|---------------------|------------------------------------------------------------------|-------------------------------------|------------------------------------------|-----------------------------------------------------------------------------------------------------------------------------------|
|                                                                                              |                                                                                                                                |                                                                                    | Tamoxifen use: 77.8%                                                                                                                                                     |                     |                                                                  |                                     |                                          |                                                                                                                                   |
|                                                                                              |                                                                                                                                |                                                                                    |                                                                                                                                                                          |                     | Recurrence (n=268)                                               |                                     | 1.35 (1.00-1.83)<br>P trend=0.04         |                                                                                                                                   |
|                                                                                              |                                                                                                                                |                                                                                    |                                                                                                                                                                          |                     | Breast cancer mortality (n=144)                                  |                                     | 1.51 (1.00-2.29)<br>P trend=0.05         |                                                                                                                                   |
| Flatt <sup>74</sup> , 2010, WHEL USA (Superseded by Kwan 2013)                               | Prospective cohort of breast cancer survivors (n= 3088) Pre- and postmenopausal mean age:52 calendar year:1995-2000 until 2006 | 1991-2000<br>Follow up= 7.3 years                                                  | Invasive: 3088<br>24.8% ER-ve,<br>75.1% ER+ve<br>38.5% stage I (=1 cm), 45.5% stage II, 15.9% stage III;<br>15.7% grade 1, 40.1% grade2, 35.9% grade 3, 8.2% unspecified | 24h Recall + FFQ    | Mortality<br><br>Additional breast cancer events (n=518)         | moderate/heavy vs. minimal g/ month | 0.69 (0.49-0.97)<br><br>0.91 (0.71-1.18) | Tumour stage, Tumour grade, weight, years btw diagnosis and study entry, parity, Physical activity, ethnicity, smoking, education |
| Li <sup>75</sup> , 2009, Seattle-Puget Sound Region Nested Case-Control Study, United States | Female Population-based nested case-control study (n=1091) Pre- and postmenopausal age range: 40-79 years, Cancer              | Diagnosed:199 0-2005 follow Up: Average 17 years, 365 contralateral breast cancers | AJCC stages: 67.4% I, 32.6% II or III; Tumor size (cm): 33.4% <=1.0, 41.7% 1.1-2.0, 21.9% >2, 3% missing<br>Chemotherapy: 26.1% yes,                                     | Interview           | Contralateral breast cancer (n=263)<br><br>Never smokers (n=212) | >=7 vs none drinks/ week            | 1.90 (1.10-3.20)<br><br>0.90 (0.50-1.80) | Age, BMI, chemotherapy, county, hormonal therapy, race, survival time, tumor stage, year of diagnosis                             |

| Author, year, study name, country, WCRF Code                                                | Study description                                                                                                                                              | Time of diagnosis and follow-up        | Disease characteristics treatment                                                                                                                                                                              | Exposure assessment                                                             | Outcome (Events)                     | Contrast               | RR (95% CI)        | Covariates |
|---------------------------------------------------------------------------------------------|----------------------------------------------------------------------------------------------------------------------------------------------------------------|----------------------------------------|----------------------------------------------------------------------------------------------------------------------------------------------------------------------------------------------------------------|---------------------------------------------------------------------------------|--------------------------------------|------------------------|--------------------|------------|
|                                                                                             | Diagnosis: 1990-2005                                                                                                                                           |                                        | 73.9% no; Radiotherapy: 65.4% yes, 34.6% no, 0.1% missing; Adjuvant hormone therapy: 66.8% yes, 33.2% no                                                                                                       |                                                                                 | Current smokers (n=51)               |                        | 3.70 (1.40-9.80)   |            |
| Knight <sup>76</sup> , 2009, WECARE, USA                                                    | Nested case-control study<br>Female (n=2107)<br>mean age:51, Cancer                                                                                            | Diagnosed:1985-2000                    | Invasive breast cancer stage I-III                                                                                                                                                                             | Interview                                                                       | Contralateral breast cancer (n=1521) | Ever drank - Yes vs No | 1.2<br>(0.90-1.50) | Age        |
| Barnett <sup>77</sup> , 2008 SEARCH<br><br>UK<br><br>(superseded by Ali <sup>69</sup> 2014) | Cancer survivors of a population-based prospective cohort study (n= 4560)<br><br>Pre- and postmenopausal<br><br>Mean age:51.5<br>Calendar year:1996 until 2005 | 1991-2005<br><br>Follow up= 6.82 years | In situ:0 - Invasive:4560<br>18.7% ER-ve, 81.2% ER+ve<br>Invasive breast cancer; 73% prevalent<br>49.7% stage I, 45.8% stage II, 3.3% stage III, 1.1% stage IV;<br>24.1% grade 1, 47.2% grade 2, 28.6% grade 3 | self-administered questionnaire<br><br>Recruited at various time post-diagnosis | All-cause mortality(n=564)           | >7 vs. ≤ 7 units/ week | 0.78 (0.64-0.95)   | NULL       |

| Author, year, study name, country, WCRF Code                                                                                                  | Study description                                                                                                                                              | Time of diagnosis and follow-up                                                                                                                                                                               | Disease characteristics treatment                                                                                                                | Exposure assessment                                                                                                                                                     | Outcome (Events)                                                                                                                  | Contrast                   | RR (95% CI)                                                                                                                                              | Covariates                                                                                                                    |
|-----------------------------------------------------------------------------------------------------------------------------------------------|----------------------------------------------------------------------------------------------------------------------------------------------------------------|---------------------------------------------------------------------------------------------------------------------------------------------------------------------------------------------------------------|--------------------------------------------------------------------------------------------------------------------------------------------------|-------------------------------------------------------------------------------------------------------------------------------------------------------------------------|-----------------------------------------------------------------------------------------------------------------------------------|----------------------------|----------------------------------------------------------------------------------------------------------------------------------------------------------|-------------------------------------------------------------------------------------------------------------------------------|
| Brewster <sup>78</sup> , 2007<br>UTS (UTMDACC)<br><br>USA<br>(superseded by Wu <sup>64</sup> 2017, could be included in the high vs low only) | Cohort<br>(n= 2327)<br>Mean age:55<br>Calendar<br>year:1985-2000                                                                                               | Follow up= 5<br>years                                                                                                                                                                                         | Early stage<br>breast cancer<br>-Tumour size: ≤2<br>(n=1603)/ >2<br>(n=57)<br>-Node negative:<br>n=1558 -Node<br>Positive: n=765<br>Missing: n=4 | Medical<br>records                                                                                                                                                      | Recurrence<br>(n=332)                                                                                                             | Heavy vs. Never/rare       | 0.98 (0.54 -<br>1.80)<br><br>P trend=0.98                                                                                                                | Treatment,<br>stage                                                                                                           |
| Trentham-Dietz <sup>79</sup> ,<br>2007, Wisconsin<br>Follow-up Study of<br>Women with<br>Invasive Breast<br>Cancer, United<br>States          | Female Follow-<br>up of cases of<br>case-control<br>studies<br>(n=10953) Pre-<br>and<br>postmenopausal<br>mean age:59.4,<br>Cancer<br>Diagnosis: 1987-<br>2000 | Diagnosed:198<br>7-2000 follow<br>Up: Average<br>7.1 years, 1188<br>second<br>cancers: 488<br>second breast<br>cancers, 132<br>colorectal<br>cancers, 113<br>endometrial<br>cancers, 36<br>ovarian<br>cancers | Stages: 63%<br>local, 28.9%<br>regional, 2.3%<br>distant, 5.8%<br>unknown                                                                        | Interview<br>interviewed<br>regarding<br>their pre-<br>diagnosis risk<br>factors<br>conducted<br>approximately<br>1 year after<br>diagnosis.<br>1987-2002<br>until 2002 | Breast cancer<br>(n=885)<br><br>Colorectal<br>cancer (n=237)<br><br>Endometrial<br>cancer (n=199)<br><br>Ovarian cancer<br>(n=60) | >7 vs none drinks/<br>week | 1.09 (0.78-<br>1.53)<br>P trend=0.91<br><br>1.92 (1.07-<br>3.43)<br>P trend=0.01<br><br>0.84 (0.42-<br>1.69)<br>P trend=0.47<br><br>0.55 (0.18-<br>1.72) | Age, alcohol intake,<br>BMI, family history, hrt,<br>menopausal status,<br>parity, smoking, tumor<br>stage, year of diagnosis |

| Author, year, study name, country, WCRF Code                                                                                                                                    | Study description                                                                                         | Time of diagnosis and follow-up                                | Disease characteristics treatment                                                                                                                                                                                                                                                                                                                                          | Exposure assessment                  | Outcome (Events)               | Contrast                                  | RR (95% CI)        | Covariates                       |
|---------------------------------------------------------------------------------------------------------------------------------------------------------------------------------|-----------------------------------------------------------------------------------------------------------|----------------------------------------------------------------|----------------------------------------------------------------------------------------------------------------------------------------------------------------------------------------------------------------------------------------------------------------------------------------------------------------------------------------------------------------------------|--------------------------------------|--------------------------------|-------------------------------------------|--------------------|----------------------------------|
|                                                                                                                                                                                 |                                                                                                           |                                                                |                                                                                                                                                                                                                                                                                                                                                                            |                                      |                                |                                           | P trend=0.87       |                                  |
| Borugian M <sup>53</sup> , 2004, Vancouver Cancer Centre of the British Columbia Cancer Agency, Canada, (Not comparable with other studies (% of energy from alcohol reported)) | Prospective cohort of breast cancer survivors (n= 603) mean age:54.5 calendar year: Recruitment 1991-1992 | Follow up= 10 years<br>146 deaths, 112 breast cancer mortality | 76.4% ER+<br>Tumour grades: 7.6% well differentiated, 46.4% moderately differentiated, 46% poorly differentiated<br>Systemic treatment: Tamoxifen only: 21.9%; Chemotherapy only: 14.7%; Chemotherapy and tamoxifen: 21.4%; Other hormone 1.9%; None 40.1%.<br>Local treatment: lumpectomy alone: 4.6%; Lumpectomy + RT: 14.6%; Complete mastectomy alone: 59.6%; Complete | semi-quantitative FFQ, Questionnaire | Breast cancer mortality(n=112) | Per 1 % / increase of energy from alcohol | 0.99 (0.94 - 1.04) | Age, Tumour stage, Energy intake |
|                                                                                                                                                                                 |                                                                                                           |                                                                |                                                                                                                                                                                                                                                                                                                                                                            |                                      | Breast cancer mortality: (N of |                                           | 0.96 (0.90 - 1.04) |                                  |

| Author, year, study name, country, WCRF Code                              | Study description                                                                                                                     | Time of diagnosis and follow-up                                            | Disease characteristics treatment                                                                                             | Exposure assessment | Outcome (Events)                                                                            | Contrast         | RR (95% CI)                             | Covariates                                                                                                                                                                                          |
|---------------------------------------------------------------------------|---------------------------------------------------------------------------------------------------------------------------------------|----------------------------------------------------------------------------|-------------------------------------------------------------------------------------------------------------------------------|---------------------|---------------------------------------------------------------------------------------------|------------------|-----------------------------------------|-----------------------------------------------------------------------------------------------------------------------------------------------------------------------------------------------------|
|                                                                           |                                                                                                                                       |                                                                            |                                                                                                                               |                     | cases is not reported. N of total pre-menopausal women= 235)                                |                  |                                         |                                                                                                                                                                                                     |
|                                                                           |                                                                                                                                       |                                                                            |                                                                                                                               |                     | Breast cancer mortality: (N of cases is not reported. N of total post-menopausal women=368) |                  | 1.00 (0.93 - 1.07)                      |                                                                                                                                                                                                     |
| Holmes <sup>34</sup> , 1999<br>NHS<br>United States                       | Cancer survivors of population-based prospective cohort study (n= 1982) Pre- and postmenopausal mean age:54 calendar year: Until 1994 | 1976-1990<br>Follow up= 157 months 378 deaths, 326 breast cancer mortality | In situ:0<br>Invasive:1982<br>Invasive breast carcinoma;<br>Grade 1-3                                                         | FFQ                 | Breast cancer mortality: (N of cases is not reported. N of total pre-menopausal women= 235) | > 15 vs 0 g/ day | 0.96 (0.90 - 1.04)                      | Age, Time between exposure assessment and cancer diagnosis, year of diagnosis, oral contraceptive, Hormonal therapy, smoking, Age at first birth, Nodal status, Tumour size, BMI, menopausal status |
|                                                                           |                                                                                                                                       |                                                                            |                                                                                                                               |                     | All-cause mortality                                                                         |                  | 0.92(0.66-1.27)                         |                                                                                                                                                                                                     |
| Tominaga <sup>80</sup> , 1998<br>Tochigi Cancer Center Hospital,<br>Japan | Follow-up of patients of a hospital-based study (n= 398)<br><br>Calendar year:1986 until 1995                                         | Breast surgery: 1986-1995<br><br>Follow up= 48 breast cancer mortality     | -TNM stages: 29.1% I, 52.3% II, 15.3% III, 3.2% IV<br>-Mastectomy: 13% partial, 1% simple, 57% modified radical, 29% radical; | Medical records     | All-cause mortality (n=98)                                                                  | Yes vs. no       | 0.10 (0.01 - 0.72)<br><br>P trend=0.023 | Age at diagnosis, TNM stage, Curability                                                                                                                                                             |

| Author, year, study name, country, WCRF Code                                          | Study description                                                                                                                            | Time of diagnosis and follow-up                                                                          | Disease characteristics treatment                                                                           | Exposure assessment                                                                                                                    | Outcome (Events)               | Contrast        | RR (95% CI)        | Covariates                                     |
|---------------------------------------------------------------------------------------|----------------------------------------------------------------------------------------------------------------------------------------------|----------------------------------------------------------------------------------------------------------|-------------------------------------------------------------------------------------------------------------|----------------------------------------------------------------------------------------------------------------------------------------|--------------------------------|-----------------|--------------------|------------------------------------------------|
|                                                                                       |                                                                                                                                              |                                                                                                          | -Chemotherapy: 65% yes, 35% no;<br>-Hormone therapy: 44% yes, 56% no<br>-Radiation therapy: 13% yes, 87% no |                                                                                                                                        |                                |                 |                    |                                                |
| Ewertz <sup>81</sup> , 1993, DBCCG, Denmark (Superseded by Ewertz 1991)               | Female Follow up of cases of a population based case-control study (n=2445) Pre- and postmenopausal, Cancer Diagnosis: 1983-1984             | Diagnosed:1983-1984 follow Up: Maximum 7 years, Loss to Follow-up: 3 patients emigrated, 805 total death | Primary invasive breast cancer; 44.8% grade I, 42.3% grade II, 12.8% grade III Adjuvant therapy             | Semi-quantitative Ffq Data collected a year after diagnosis to avoid the period when adjuvant chemotherapy was administered Until 1990 | Total mortality (n=805)        | High vs low     | 1.30 (0.10-1.75)   | NULL                                           |
| Rohan, 1993, Diet and Breast Cancer in Australia Follow-up Study, Australia, SBR00120 | Follow-up of cases of population-based case-control study (n= 412) Pre- and postmenopausal<br><br>Mean age:55.1<br>Calendar year: Until 1989 | 1982-1984<br><br>Follow up= 5.5 years                                                                    | Primary breast cancer, any stages                                                                           | FFQ                                                                                                                                    | Breast cancer mortality(n=412) | ≥10 vs. 0 g/day | 0.86 (0.51 – 1.47) | Energy intake, Age of menarche, Quetelet Index |

| Author, year, study name, country, WCRF Code  | Study description                                                                                          | Time of diagnosis and follow-up | Disease characteristics treatment                                                                                         | Exposure assessment      | Outcome (Events)            | Contrast          | RR (95% CI)     | Covariates                                                                     |
|-----------------------------------------------|------------------------------------------------------------------------------------------------------------|---------------------------------|---------------------------------------------------------------------------------------------------------------------------|--------------------------|-----------------------------|-------------------|-----------------|--------------------------------------------------------------------------------|
| Ewertz <sup>54</sup> , 1991<br>DBCCG, Denmark | Cohort study (n= 2445)<br>Pre- and postmenopausal<br><br>Calendar year: 1983-1984 until 1990 Death (n=805) | Follow up= 7 years              | In situ:0<br>Invasive:2445<br>Primary Invasive breast cancer; 44.8%Grade I, 42.3% Grade II, 12.8% Grade III breast cancer | semi-quantitative<br>FFQ | All-cause mortality (n=485) | >121 vs. 0 g/week | 1.26(0.90-1.74) | Age, Tumour size, Nodal status, Tumour grade, Skin invasion, Area of residence |

Abbreviations: ABCPP, After Breast Cancer Pooling Project; CWLS, Collaborative Women's Longevity Study; DBCCG, Danish Breast Cancer Cooperative Group; DCHS, Danish Diet, Cancer and Health Cohort; LACE, Life After Cancer Epidemiology; LIBCSP, Long Island Breast Cancer Study Project; NHS, Nurses' Health Study; NRWHS, National Runner's and Walker's Health study; SEARCH, Studies of Epidemiology and Risk Factors in Cancer Heredity Breast Cancer Study; VCCBCC, Vancouver Cancer Centre of the British Columbia Cancer Agency; WHI, Women's Health Initiative; WHEL; Women's Healthy Eating and Living; WISC, Wisconsin In Situ Cohort Study

**Supplementary Table S19. Descriptive table of the included observational studies of post-diagnosis multivitamin use and breast cancer prognosis**

| Author, year, study name, country, WCRF Code      | Study description                                                                                       | Time of diagnosis and follow-up                                                                                 | Disease characteristics treatment                                                                                                                                                        | Exposure assessment                                                         | Outcome (Events)                         | Contrast                                                        | RR (95% CI)                  | Covariates                                                                                                                                                                             |
|---------------------------------------------------|---------------------------------------------------------------------------------------------------------|-----------------------------------------------------------------------------------------------------------------|------------------------------------------------------------------------------------------------------------------------------------------------------------------------------------------|-----------------------------------------------------------------------------|------------------------------------------|-----------------------------------------------------------------|------------------------------|----------------------------------------------------------------------------------------------------------------------------------------------------------------------------------------|
| Nechuta <sup>82</sup><br>2011,<br>SBCSS,<br>China | Population-based cohort study (n=4877), pre- and post-menopausal, age range: 20-75 years, race: Chinese | Diagnosis: 2002-2006, follow-up: mean 4.1 years, 444 total deaths, 389 from breast cancer, 55 from other causes | Stage I 34.5%, II 50.9%, III-IV 10.1%, missing 4.6%, ER+/PR+ 50.05%, ER+/PR- 13%, ER-/PR+ 7.4%, ER-/PR- 27.7%, unknown 1.9%, chemotherapy 92.2%, radiotherapy 32.8%, tamoxifen use 51.7% | Interview, by trained professional, at on average 6.5 months post-diagnosis | All-cause mortality (n=333)              | Multivitamin supplement use, yes vs never                       | 0.82 (0.57-1.17)             | Receptor status, TNM stage, chemotherapy, radiotherapy, tamoxifen use, education, income, BMI, tea consumption, exercise, cruciferous vegetables, soy protein, vitamin E, antioxidants |
|                                                   |                                                                                                         |                                                                                                                 |                                                                                                                                                                                          |                                                                             | Breast cancer-specific mortality (n=290) |                                                                 | 0.77 (0.52-1.15)             |                                                                                                                                                                                        |
|                                                   |                                                                                                         |                                                                                                                 |                                                                                                                                                                                          |                                                                             | Recurrence (n=398)                       |                                                                 | 0.74 (0.53-1.03)             |                                                                                                                                                                                        |
|                                                   |                                                                                                         |                                                                                                                 |                                                                                                                                                                                          |                                                                             | All-cause mortality (n=333)              | Multivitamin supplement use, duration of use ≤3 months vs never | 1.01 (0.63-1.64)             |                                                                                                                                                                                        |
|                                                   |                                                                                                         |                                                                                                                 |                                                                                                                                                                                          |                                                                             | Breast cancer-specific mortality (n=290) |                                                                 | 0.88 (0.51-1.52)             |                                                                                                                                                                                        |
|                                                   |                                                                                                         |                                                                                                                 |                                                                                                                                                                                          |                                                                             | Recurrence (n=398)                       |                                                                 | 0.70 (0.42-1.17)             |                                                                                                                                                                                        |
|                                                   |                                                                                                         |                                                                                                                 |                                                                                                                                                                                          |                                                                             | All-cause mortality (n=333)              |                                                                 | Multivitamin supplement use, |                                                                                                                                                                                        |



| Author, year, study name, country, WCRF Code | Study description                                                                                                                   | Time of diagnosis and follow-up                   | Disease characteristics treatment                                                                                                                                     | Exposure assessment                                          | Outcome (Events)                         | Contrast                                                           | RR (95% CI)      | Covariates                                                                                                                                      |
|----------------------------------------------|-------------------------------------------------------------------------------------------------------------------------------------|---------------------------------------------------|-----------------------------------------------------------------------------------------------------------------------------------------------------------------------|--------------------------------------------------------------|------------------------------------------|--------------------------------------------------------------------|------------------|-------------------------------------------------------------------------------------------------------------------------------------------------|
|                                              |                                                                                                                                     |                                                   |                                                                                                                                                                       |                                                              | Breast cancer-specific mortality (n=290) | duration of use >3 months vs never                                 | 0.69 (0.41-1.18) |                                                                                                                                                 |
|                                              |                                                                                                                                     |                                                   |                                                                                                                                                                       |                                                              | Recurrence (n=398)                       |                                                                    | 0.77 (0.51-1.16) |                                                                                                                                                 |
| Ambrosone <sup>83</sup><br>2020, DELCaP, USA | Secondary analysis of clinical trials (n=1134), age range: 23-80 years, pre-menopausal 47%, post-menopausal 52%, race: mostly White | Diagnosis: 2003-2010, follow-up: median 8.1 years | Stage II-III, ER+ or PR+ 65%, ER- or PR- 35%, HER2+ 21%, radical mastectomy or local excision of all tumours plus axillary node dissection or sentinel node resection | Questionnaire, self-administered, at 6 months post-diagnosis | Overall survival (n=181)                 | Multivitamin supplement use, during treatment vs no use            | 0.91 (0.54-1.55) | Age, alcohol intake, BMI, er status, her2 status, lymph node status, physical activity, pr status, smoking, toxicity, treatment arm, tumor size |
|                                              |                                                                                                                                     |                                                   |                                                                                                                                                                       |                                                              |                                          | Multivitamin supplement use, before treatment vs no use            | 1.35 (0.87-2.09) |                                                                                                                                                 |
|                                              |                                                                                                                                     |                                                   |                                                                                                                                                                       |                                                              |                                          | Multivitamin supplement use, before and during treatment vs no use | 1.31 (0.92-1.88) |                                                                                                                                                 |
|                                              |                                                                                                                                     |                                                   |                                                                                                                                                                       |                                                              | Disease-free survival (n=432)            | Multivitamin supplement use, during treatment vs no use            | 1.02 (0.67-1.56) |                                                                                                                                                 |

| Author, year, study name, country, WCRF Code | Study description                                                                        | Time of diagnosis and follow-up                             | Disease characteristics treatment                                                                                                                                                     | Exposure assessment                           | Outcome (Events)                  | Contrast                                                           | RR (95% CI)      | Covariates                                                                                                                                                                                                                  |
|----------------------------------------------|------------------------------------------------------------------------------------------|-------------------------------------------------------------|---------------------------------------------------------------------------------------------------------------------------------------------------------------------------------------|-----------------------------------------------|-----------------------------------|--------------------------------------------------------------------|------------------|-----------------------------------------------------------------------------------------------------------------------------------------------------------------------------------------------------------------------------|
|                                              |                                                                                          |                                                             |                                                                                                                                                                                       |                                               |                                   | Multivitamin supplement use, before treatment vs no use            | 1.27 (0.88-1.84) |                                                                                                                                                                                                                             |
|                                              |                                                                                          |                                                             |                                                                                                                                                                                       |                                               |                                   | Multivitamin supplement use, before and during treatment vs no use | 1.21 (0.90-1.64) |                                                                                                                                                                                                                             |
| Jung <sup>84</sup> 2019, MARIE, Germany      | Prospective cohort of cancer survivors (n=2223), age range: 58-66 years, post-menopausal | Diagnosis: 2002-2005, follow-up: median 6 years, until 2015 | Stage I-IV, grade low 19.6%, moderate 49.3%, high 21.9%, ER+/PR+ 60.7%, ER+ or PR+ 16.8%, ER-/PR- 13.5%, HER2+ 15.4%, HER2- 68.0%, mastectomy 26.1%, breast-conserving therapy 73.7%, | Interview, at median 5.8 years post-diagnosis | Overall survival (n=328)          | Multivitamin supplement use, yes vs no                             | 1.13 (0.86-1.50) | Age, alcohol intake, BMI, cardiovascular disease, chemotherapy, detection type, diabetes, education, hormone receptor status, menopausal hormone therapy use, nodal status, other factors, physical activity, radiotherapy, |
|                                              |                                                                                          |                                                             |                                                                                                                                                                                       |                                               | Cancer specific mortality (n=180) |                                                                    | 0.97 (0.68-1.37) |                                                                                                                                                                                                                             |
|                                              |                                                                                          |                                                             |                                                                                                                                                                                       |                                               | Recurrence (n=515)                |                                                                    | 1.10 (0.88-1.38) |                                                                                                                                                                                                                             |

| Author, year, study name, country, WCRF Code | Study description                                                                                                     | Time of diagnosis and follow-up                                 | Disease characteristics treatment                                   | Exposure assessment                                             | Outcome (Events)                         | Contrast                                                        | RR (95% CI)      | Covariates                                                                                                                                                                                                                        |
|----------------------------------------------|-----------------------------------------------------------------------------------------------------------------------|-----------------------------------------------------------------|---------------------------------------------------------------------|-----------------------------------------------------------------|------------------------------------------|-----------------------------------------------------------------|------------------|-----------------------------------------------------------------------------------------------------------------------------------------------------------------------------------------------------------------------------------|
|                                              |                                                                                                                       |                                                                 | chemotherapy 45.8%, radiation therapy 70.9%, hormone therapy 80.7%  |                                                                 |                                          |                                                                 |                  | smoking, tumor grade, tumor size                                                                                                                                                                                                  |
| Kwan <sup>85</sup><br>2011, LACE, USA        | Prospective cohort of cancer survivors (n=2236), age range: 18-79 years, pre- and post-menopausal, race: mostly White | Diagnosis: 1997-2000, follow-up: average 8.33 years, until 2011 | Stage I-III A, treatment completed except for adjuvant chemotherapy | FFQ, self-administered, at on average 1.91 years post-diagnosis | All-cause mortality (n=311)              | Multivitamin supplement use with or without minerals, yes vs no | 0.92 (0.71-1.19) | Age at diagnosis, education, fruit and vegetable consumption, hormone receptor status, non-sedentary physical activity, other antioxidant use, positive lymph nodes, pre-diagnosis BMI, race/ethnicity, smoking, stage, treatment |
|                                              |                                                                                                                       |                                                                 |                                                                     |                                                                 | Breast cancer-specific mortality (n=167) |                                                                 | 0.87 (0.60-1.24) |                                                                                                                                                                                                                                   |
|                                              |                                                                                                                       |                                                                 |                                                                     |                                                                 | Recurrence (n=312)                       |                                                                 | 0.92 (0.71-1.20) |                                                                                                                                                                                                                                   |
|                                              |                                                                                                                       |                                                                 |                                                                     |                                                                 | All-cause mortality (n=266)              | Multivitamin supplement use                                     | 0.93 (0.71-1.22) |                                                                                                                                                                                                                                   |

| Author, year, study name, country, WCRF Code | Study description | Time of diagnosis and follow-up | Disease characteristics treatment | Exposure assessment | Outcome (Events)                         | Contrast                                                | RR (95% CI)                      | Covariates |
|----------------------------------------------|-------------------|---------------------------------|-----------------------------------|---------------------|------------------------------------------|---------------------------------------------------------|----------------------------------|------------|
|                                              |                   |                                 |                                   |                     |                                          | with minerals, yes vs no                                | P trend=0.60                     |            |
|                                              |                   |                                 |                                   |                     | Breast cancer-specific mortality (n=141) |                                                         | 0.87 (0.6-1.27)<br>P trend=0.48  |            |
|                                              |                   |                                 |                                   |                     | Recurrence (n=265)                       |                                                         | 0.89 (0.67-1.17)<br>P trend=0.39 |            |
|                                              |                   |                                 |                                   |                     | All-cause mortality (n=266)              | Multivitamin supplement use without minerals, yes vs no | 0.87 (0.5-1.51)<br>P trend=0.61  |            |
|                                              |                   |                                 |                                   |                     | Breast cancer-specific mortality (n=141) |                                                         | 0.82 (0.39-1.73)<br>P trend=0.60 |            |
|                                              |                   |                                 |                                   |                     | Recurrence (n=265)                       |                                                         | 0.83 (0.49-1.42)                 |            |

| Author, year, study name, country, WCRF Code | Study description | Time of diagnosis and follow-up | Disease characteristics treatment | Exposure assessment                      | Outcome (Events)            | Contrast                                                                     | RR (95% CI)      | Covariates   |
|----------------------------------------------|-------------------|---------------------------------|-----------------------------------|------------------------------------------|-----------------------------|------------------------------------------------------------------------------|------------------|--------------|
|                                              |                   |                                 |                                   |                                          |                             |                                                                              | P trend=0.50     |              |
|                                              |                   |                                 |                                   |                                          | All-cause mortality (n=306) | Multivitamin supplement use with or without minerals, 6-7 days/week vs never | 0.92 (0.70-1.20) |              |
|                                              |                   |                                 |                                   | Breast cancer-specific mortality (n=164) | 0.88 (0.61-1.28)            |                                                                              | P trend=0.55     |              |
|                                              |                   |                                 |                                   | Recurrence (n=307)                       | 0.90 (0.69-1.19)            |                                                                              | P trend=0.56     |              |
|                                              |                   |                                 |                                   |                                          | All-cause mortality (n=261) | Multivitamin supplement use with or without minerals before and after        | 0.79 (0.56-1.12) | P trend=0.44 |
|                                              |                   |                                 |                                   |                                          |                             |                                                                              | P trend=0.18     |              |

| Author, year, study name, country, WCRF Code | Study description | Time of diagnosis and follow-up | Disease characteristics treatment | Exposure assessment | Outcome (Events)                         | Contrast                         | RR (95% CI)                      | Covariates |
|----------------------------------------------|-------------------|---------------------------------|-----------------------------------|---------------------|------------------------------------------|----------------------------------|----------------------------------|------------|
|                                              |                   |                                 |                                   |                     | Breast cancer-specific mortality (n=145) | diagnosis 3-5 days/week vs never | 0.70 (0.44-1.11)<br>P trend=0.12 |            |
|                                              |                   |                                 |                                   |                     | Recurrence (n=261)                       |                                  | 0.76 (0.54-1.06)<br>P trend=0.11 |            |

Abbreviations: SBCCS, Shanghai Breast Cancer Genetics Study

**Supplementary Table S20. Descriptive table of the included observational studies of post-diagnosis antioxidants use and breast cancer prognosis**

| Author, year, study name, country, WCRF Code   | Study description                                                                                                                        | Time of diagnosis and follow-up                 | Disease characteristics treatment | Exposure assessment                                                                        | Outcome (Events)                | Contrast                                     | RR (95% CI)      | Covariates                                                                                                  |
|------------------------------------------------|------------------------------------------------------------------------------------------------------------------------------------------|-------------------------------------------------|-----------------------------------|--------------------------------------------------------------------------------------------|---------------------------------|----------------------------------------------|------------------|-------------------------------------------------------------------------------------------------------------|
| Poole <sup>86</sup> 2013, ABCPP, China and USA | Consortium of four prospective cohort studies (n=12,019), age range: 20-83 years, pre- and post-menopausal, race: mostly Asian and White | Diagnosis: 1976-2006, follow-up: mean 8.4 years | Stage I-III                       | In-person interview or mailed questionnaire, self-reported, at least 1 year post-diagnosis | Total mortality (n=1298)        | Antioxidant supplement use, yes vs no        | 0.84 (0.72-0.99) | Age at diagnosis, exercise, stage, treatment, BMI, menopausal status, smoking status, Vitamin A, B, C, D, E |
|                                                |                                                                                                                                          |                                                 |                                   |                                                                                            | Breast cancer mortality (n=849) |                                              | 0.88 (0.74-1.03) |                                                                                                             |
|                                                |                                                                                                                                          |                                                 |                                   |                                                                                            | Recurrence (n=1325)             |                                              | 0.94 (0.83-1.07) |                                                                                                             |
|                                                |                                                                                                                                          |                                                 |                                   |                                                                                            | ER-positive, recurrence (n=703) |                                              | 0.95 (0.82-1.10) |                                                                                                             |
|                                                |                                                                                                                                          |                                                 |                                   |                                                                                            | ER-negative, recurrence (n=198) | 0.87 (0.67-1.12)                             |                  |                                                                                                             |
|                                                |                                                                                                                                          |                                                 |                                   |                                                                                            | Total mortality (n=1298)        | Number of antioxidant supplement use, 3 vs 0 | 0.79 (0.66-0.95) |                                                                                                             |
|                                                |                                                                                                                                          |                                                 |                                   |                                                                                            | Breast cancer mortality (n=849) |                                              | 0.85 (0.67-1.07) |                                                                                                             |
|                                                |                                                                                                                                          |                                                 |                                   |                                                                                            | Recurrence (n=1325)             |                                              | 0.88 (0.74-1.05) |                                                                                                             |
| ER-positive, recurrence (n=181)                | 0.93 (0.77-1.13)                                                                                                                         |                                                 |                                   |                                                                                            |                                 |                                              |                  |                                                                                                             |

|                                             |                                                                                                         |                                                                                                                 |                                                                                                                                                                                          |                                                                             |                                                                            |                                                            |                  |                                                                                                                                                                                                    |
|---------------------------------------------|---------------------------------------------------------------------------------------------------------|-----------------------------------------------------------------------------------------------------------------|------------------------------------------------------------------------------------------------------------------------------------------------------------------------------------------|-----------------------------------------------------------------------------|----------------------------------------------------------------------------|------------------------------------------------------------|------------------|----------------------------------------------------------------------------------------------------------------------------------------------------------------------------------------------------|
|                                             |                                                                                                         |                                                                                                                 |                                                                                                                                                                                          |                                                                             | ER-negative, recurrence (n=45)                                             |                                                            | 0.73 (0.51-1.07) |                                                                                                                                                                                                    |
| Nechuta <sup>82</sup><br>2011, SBCSS, China | Population-based cohort study (n=4877), pre- and post-menopausal, age range: 20-75 years, race: Chinese | Diagnosis: 2002-2006, follow-up: mean 4.1 years, 444 total deaths, 389 from breast cancer, 55 from other causes | Stage I 34.5%, II 50.9%, III-IV 10.1%, missing 4.6%, ER+/PR+ 50.05%, ER+/PR- 13%, ER-/PR+ 7.4%, ER-/PR- 27.7%, unknown 1.9%, chemotherapy 92.2%, radiotherapy 32.8%, tamoxifen use 51.7% | Interview, by trained professional, at on average 6.5 months post-diagnosis | Total mortality (n=404) (Result superseded by Poole 2013)                  | Antioxidant supplement use, yes vs never                   | 0.82 (0.65-1.02) | Receptor status, TNM stage, chemotherapy, radiotherapy, tamoxifen use, education, Income, BMI, Tea consumption, exercise, cruciferous vegetables, soy protein, multivitamins, vitamin E, vitamin C |
|                                             |                                                                                                         |                                                                                                                 |                                                                                                                                                                                          |                                                                             | Breast cancer-specific mortality (n=352) (Result superseded by Poole 2013) |                                                            | 0.79 (0.62-1.01) |                                                                                                                                                                                                    |
|                                             |                                                                                                         |                                                                                                                 |                                                                                                                                                                                          |                                                                             | Breast cancer recurrence (n=486) (Result superseded by Poole 2013)         |                                                            | 0.78 (0.63-0.95) |                                                                                                                                                                                                    |
|                                             |                                                                                                         |                                                                                                                 |                                                                                                                                                                                          |                                                                             | Total mortality (n=404)                                                    | Duration of antioxidant supplement use, ≤3 months vs never | 1.13 (0.85–1.50) |                                                                                                                                                                                                    |
|                                             |                                                                                                         |                                                                                                                 |                                                                                                                                                                                          |                                                                             | Breast cancer mortality (n=352)                                            |                                                            | 1.05 (0.77-1.43) |                                                                                                                                                                                                    |
|                                             |                                                                                                         |                                                                                                                 |                                                                                                                                                                                          |                                                                             | Recurrence (n=486)                                                         |                                                            | 0.92 (0.70–1.21) |                                                                                                                                                                                                    |
|                                             |                                                                                                         |                                                                                                                 |                                                                                                                                                                                          |                                                                             | Total mortality (n=404)                                                    | Duration of antioxidant supplement use, >3 months vs never | 0.60 (0.44-0.82) |                                                                                                                                                                                                    |
|                                             |                                                                                                         |                                                                                                                 |                                                                                                                                                                                          |                                                                             | Breast cancer mortality (n=352)                                            |                                                            | 0.60 (0.43-0.85) |                                                                                                                                                                                                    |



|                                              |                                                                                          |                                                             |                                                                                                                                                                                                                                                          |                                                     |                                   |                                       |                                  |                                                                                                                                                                                                                                                              |
|----------------------------------------------|------------------------------------------------------------------------------------------|-------------------------------------------------------------|----------------------------------------------------------------------------------------------------------------------------------------------------------------------------------------------------------------------------------------------------------|-----------------------------------------------------|-----------------------------------|---------------------------------------|----------------------------------|--------------------------------------------------------------------------------------------------------------------------------------------------------------------------------------------------------------------------------------------------------------|
|                                              |                                                                                          |                                                             |                                                                                                                                                                                                                                                          |                                                     | Recurrence<br>(n=486)             |                                       | 0.67 (0.51-0.88)                 |                                                                                                                                                                                                                                                              |
| Fleischauer <sup>87</sup> 2003, FASTCAB, USA | (n= 385), mean age: 62.1 years, post-menopausal                                          | Diagnosis: 1986-1988, follow-up: 14 years, until 1999       | Invasive primary breast cancer                                                                                                                                                                                                                           | FFQ and questionnaire, self-administered, 124 items | Disease-free survival (n=58)      | Antioxidant supplement use, yes vs no | 0.54 (0.27-1.04)                 | Age at diagnosis, age at menopause, tumour stage, tamoxifen use, radiotherapy, hormonal therapy, smoking, physical activity, dietary factors                                                                                                                 |
| Jung <sup>84</sup> 2019, MARIE, Germany      | Prospective cohort of cancer survivors (n=2223), age range: 58-66 years, post-menopausal | Diagnosis: 2002-2005, follow-up: median 6 years, until 2015 | Stage I-IV, grade low 19.6%, moderate 49.3%, high 21.9%, ER+/PR+ 60.7%, ER+ or PR+ 16.8%, ER-/PR- 13.5%, HER2+ 15.4%, HER2- 68.0%, mastectomy 26.1%, breast-conserving therapy 73.7%, chemotherapy 45.8%, radiation therapy 70.9%, hormone therapy 80.7% | Interview, at median 5.8 years post-diagnosis       | All-cause mortality (n=278)       | Antioxidant supplement use, yes vs no | 1.02 (0.75-1.39)<br>P trend=0.91 | Age, alcohol intake, BMI, cardiovascular disease, chemotherapy, detection type, diabetes, education, hormone receptor status, menopausal hormone therapy use, nodal status, other factors, physical activity, radiotherapy, smoking, tumor grade, tumor size |
|                                              |                                                                                          |                                                             |                                                                                                                                                                                                                                                          |                                                     | Cancer specific mortality (n=161) |                                       | 1.34 (0.91-1.97)<br>P trend=0.14 |                                                                                                                                                                                                                                                              |
|                                              |                                                                                          |                                                             |                                                                                                                                                                                                                                                          |                                                     | Recurrence (n=440)                |                                       | 1.14 (0.89-1.45)<br>P trend=0.31 |                                                                                                                                                                                                                                                              |
|                                              |                                                                                          |                                                             |                                                                                                                                                                                                                                                          |                                                     | Chemotherapy and/or radiation,    |                                       | Antioxidant supplement           |                                                                                                                                                                                                                                                              |

|  |  |  |  |  |                                                                  |                                          |                                   |  |
|--|--|--|--|--|------------------------------------------------------------------|------------------------------------------|-----------------------------------|--|
|  |  |  |  |  | All-cause mortality (n=217)                                      | use during adjuvant treatment, yes vs no | P trend=0.04                      |  |
|  |  |  |  |  | Chemotherapy, All-cause mortality (n=150)                        |                                          | 1.80 (0.96-3.40)<br>P trend=0.07  |  |
|  |  |  |  |  | Radiation, All-cause mortality (n=195)                           |                                          | 1.18 (0.74-1.87)<br>P trend=0.49  |  |
|  |  |  |  |  | Chemotherapy and/or radiation, cancer specific mortality (n=128) |                                          | 1.80 (0.97-3.35)<br>P trend=0.06  |  |
|  |  |  |  |  | Chemotherapy, Cancer specific mortality (n=134)                  |                                          | 1.99 (0.94-4.20)<br>P trend=0.07  |  |
|  |  |  |  |  | Radiation, Cancer specific mortality (n=114)                     |                                          | 1.73 (0.87-3.44)<br>P trend=0.12  |  |
|  |  |  |  |  | Chemotherapy and/or radiation, Recurrence (n=330)                |                                          | 1.84 (1.26-2.68)<br>P trend=0.002 |  |
|  |  |  |  |  | Chemotherapy, Recurrence (n=373)                                 |                                          | 2.24 (1.39-3.63)<br>P trend=0.001 |  |
|  |  |  |  |  | Radiation, Recurrence (n=294)                                    |                                          | 1.63 (1.07-2.48)                  |  |

|                                                 |                                                                                                                                     |                                                   |                                                                                                                                                                 |                                                              |                               |                                                                   |                  |                                                                                                                                                                |
|-------------------------------------------------|-------------------------------------------------------------------------------------------------------------------------------------|---------------------------------------------------|-----------------------------------------------------------------------------------------------------------------------------------------------------------------|--------------------------------------------------------------|-------------------------------|-------------------------------------------------------------------|------------------|----------------------------------------------------------------------------------------------------------------------------------------------------------------|
|                                                 |                                                                                                                                     |                                                   |                                                                                                                                                                 |                                                              |                               |                                                                   | P trend=0.02     |                                                                                                                                                                |
| Ambrosone <sup>83</sup><br>2020,<br>DELCaP, USA | Secondary analysis of clinical trials (n=1134), age range: 23-80 years, pre-menopausal 47%, post-menopausal 52%, race: mostly White | Diagnosis: 2003-2010, follow-up: median 8.1 years | Stage II-III, ER+/PR+ 65%, ER-/PR- 35%, HER2+ 21%, radical mastectomy or local excision of all tumours plus axillary node dissection or sentinel node resection | Questionnaire, self-administered, at 6 months post-diagnosis | All-cause mortality (n=181)   | Antioxidant supplement use, during treatment vs no use            | 1.03 (0.53-1.98) | Age, alcohol intake, BMI, er status, her2 status, lymph node status, multivitamins, physical activity, pr status, smoking, toxicity, treatment arm, tumor size |
|                                                 |                                                                                                                                     |                                                   |                                                                                                                                                                 |                                                              |                               | Antioxidant supplement use, before treatment vs no use            | 1.19 (0.81-1.76) |                                                                                                                                                                |
|                                                 |                                                                                                                                     |                                                   |                                                                                                                                                                 |                                                              |                               | Antioxidant supplement use, before and during treatment vs no use | 1.40 (0.90-2.18) |                                                                                                                                                                |
|                                                 |                                                                                                                                     |                                                   |                                                                                                                                                                 |                                                              | Disease-free survival (n=432) | Antioxidant supplement use, during treatment vs no use            | 0.92 (0.52-1.64) |                                                                                                                                                                |
|                                                 |                                                                                                                                     |                                                   |                                                                                                                                                                 |                                                              |                               | Antioxidant supplement use, before treatment vs no use            | 1.04 (0.74-1.47) |                                                                                                                                                                |
|                                                 |                                                                                                                                     |                                                   |                                                                                                                                                                 |                                                              |                               | Antioxidant supplement use, before and during treatment vs no use | 1.41 (0.98-2.04) |                                                                                                                                                                |

Abbreviations: ABCPP, After Breast Cancer Pooling Project; LACE, Life After Cancer Epidemiology; NHS, Nurses' Health Study; SBCCS, Shanghai Breast Cancer Genetics Study; WHEL; Women's Healthy Eating and Living

**Supplementary Table S21. Descriptive table of the included observational studies of post-diagnosis any vitamin or mineral use and breast cancer prognosis**

| Author, year, study name, country, WCRF Code      | Study description                                                                | Time of diagnosis and follow-up                                | Disease characteristics treatment                                                 | Exposure assessment                                   | Outcome (Events)                                                                  | Contrast                             | RR (95% CI)      | Covariates |
|---------------------------------------------------|----------------------------------------------------------------------------------|----------------------------------------------------------------|-----------------------------------------------------------------------------------|-------------------------------------------------------|-----------------------------------------------------------------------------------|--------------------------------------|------------------|------------|
| Saqib <sup>88</sup><br>2012,<br>WHEL,<br>USA      | Secondary analysis of clinical trials (n= 177), age range: 18-70 years           | Diagnosis: 1991-1996, follow-up: average 7.3 years, until 2006 | Stage I-III A                                                                     | 24h recall, at baseline                               | Breast cancer recurrence (n=34), women did not receive systemic treatment (n=177) | Number of supplement use, ≥3 vs ≤2   | 1.10 (0.56-2.26) |            |
|                                                   |                                                                                  |                                                                |                                                                                   |                                                       | Breast cancer recurrence, women who received systemic treatment (n=2909)          |                                      | 1.03 (0.86-1.23) |            |
| Nechuta <sup>82</sup><br>2011,<br>SBCSS,<br>China | Population-based cohort study (n=4877), pre- and post-menopausal, age range: 20- | Diagnosis: 2002-2006, follow-up: 4.1 years,                    | Stage I 34.5%, II 50.9%, III-IV 10.1%, missing 4.6%, ER+/PR+ 50.05%, ER+/PR- 13%, | Interview, by trained professional, at on average 6.5 | Total mortality (n=444)                                                           | Vitamin supplement use, yes vs never | 0.88 (0.72-1.08) |            |
|                                                   |                                                                                  |                                                                |                                                                                   |                                                       | Total mortality (n=53) ER/PR-positive                                             |                                      | 0.98 (0.69-1.38) |            |

| Author, year, study name, country, WCRF Code | Study description       | Time of diagnosis and follow-up                                | Disease characteristics treatment                                                                      | Exposure assessment   | Outcome (Events)                        | Contrast | RR (95% CI)      | Covariates |
|----------------------------------------------|-------------------------|----------------------------------------------------------------|--------------------------------------------------------------------------------------------------------|-----------------------|-----------------------------------------|----------|------------------|------------|
|                                              | 75 years, race: Chinese | 444 total deaths, 389 from breast cancer, 55 from other causes | ER-/PR+ 7.4%, ER-/PR- 27.7%, unknown 1.9%, chemotherapy 92.2%, radiotherapy 32.8%, tamoxifen use 51.7% | months post-diagnosis | Total mortality (n=62) ER/PR-negative   |          | 0.84 (0.61-1.16) |            |
|                                              |                         |                                                                |                                                                                                        |                       | Total mortality (n=95) Stage I or II    |          | 0.86 (0.67-1.10) |            |
|                                              |                         |                                                                |                                                                                                        |                       | Total mortality (n=48) Stage III or IV  |          | 0.87 (0.60-1.27) |            |
|                                              |                         |                                                                |                                                                                                        |                       | Total mortality (n=79) radiotherapy     |          | 1.03 (0.77-1.38) |            |
|                                              |                         |                                                                |                                                                                                        |                       | Total mortality (n=169) no radiotherapy |          | 0.75 (0.56-1.00) |            |
|                                              |                         |                                                                |                                                                                                        |                       | Total mortality (n=135) chemotherapy    |          | 0.89 (0.72-1.09) |            |

| Author, year, study name, country, WCRF Code | Study description | Time of diagnosis and follow-up | Disease characteristics treatment | Exposure assessment | Outcome (Events)                             | Contrast | RR (95% CI)      | Covariates |
|----------------------------------------------|-------------------|---------------------------------|-----------------------------------|---------------------|----------------------------------------------|----------|------------------|------------|
|                                              |                   |                                 |                                   |                     | Total mortality (n=23) no chemotherapy       |          | 0.79 (0.52-1.22) |            |
|                                              |                   |                                 |                                   |                     | Total mortality (n=68) used tamoxifen        |          | 0.90 (0.66-1.25) |            |
|                                              |                   |                                 |                                   |                     | Total mortality (n=79) did not use tamoxifen |          | 0.89 (0.68-1.18) |            |
|                                              |                   |                                 |                                   |                     | Breast cancer-specific mortality (n=389)     |          | 0.88 (0.71-1.09) |            |
|                                              |                   |                                 |                                   |                     | Recurrence (n=532)                           |          | 0.84 (0.7-1.01)  |            |
|                                              |                   |                                 |                                   |                     | Recurrence (n=66) ER/PR-positive             |          | 0.95 (0.70-1.29) |            |
|                                              |                   |                                 |                                   |                     | Recurrence (n=71) ER/PR-negative             |          | 0.78 (0.58-1.05) |            |

| Author, year, study name, country, WCRF Code | Study description | Time of diagnosis and follow-up | Disease characteristics treatment | Exposure assessment | Outcome (Events)                                | Contrast | RR (95% CI)      | Covariates |
|----------------------------------------------|-------------------|---------------------------------|-----------------------------------|---------------------|-------------------------------------------------|----------|------------------|------------|
|                                              |                   |                                 |                                   |                     | Recurrence (n=116) Stage I or II                |          | 0.82 (0.65-1.03) |            |
|                                              |                   |                                 |                                   |                     | Recurrence (n=56) Stage III or IV               |          | 0.80 (0.57-1.14) |            |
|                                              |                   |                                 |                                   |                     | Recurrence (n=96) radiotherapy                  |          | 1.02 (0.78-1.33) |            |
|                                              |                   |                                 |                                   |                     | Recurrence (n=79) no radiotherapy               |          | 0.72 (0.55-0.94) |            |
|                                              |                   |                                 |                                   |                     | Recurrence (n=170) chemotherapy                 |          | 0.87 (0.72-1.06) |            |
|                                              |                   |                                 |                                   |                     | Breast cancer recurrence (n=24) no chemotherapy |          | 0.66 (0.43-1.00) |            |



| Author, year, study name, country, WCRF Code | Study description | Time of diagnosis and follow-up | Disease characteristics treatment | Exposure assessment                      | Outcome (Events)                        | Contrast                                                   | RR (95% CI)      | Covariates |
|----------------------------------------------|-------------------|---------------------------------|-----------------------------------|------------------------------------------|-----------------------------------------|------------------------------------------------------------|------------------|------------|
|                                              |                   |                                 |                                   |                                          | Recurrence (n=79) used tamoxifen        |                                                            | 0.77 (0.58-1.02) |            |
|                                              |                   |                                 |                                   |                                          | Recurrence (n=96) did not use tamoxifen |                                                            | 0.89 (0.69-1.15) |            |
|                                              |                   |                                 |                                   |                                          | Total mortality (n=444)                 | Duration of any vitamin supplement use, ≤3 months vs never | 1.09 (0.81-1.45) |            |
|                                              |                   |                                 |                                   | Breast cancer-specific mortality (n=389) | 1.04 (0.76-1.43)                        |                                                            |                  |            |
|                                              |                   |                                 |                                   | Recurrence (n=532)                       | 0.90 (0.69-1.19)                        |                                                            |                  |            |
|                                              |                   |                                 |                                   |                                          | Total mortality (n=444)                 | Duration of any vitamin supplement use, >3                 | 0.79 (0.62-1.00) |            |
|                                              |                   |                                 |                                   | Breast cancer-specific mortality (n=389) | 0.80 (0.62-1.03)                        |                                                            |                  |            |

| Author, year, study name, country, WCRF Code | Study description | Time of diagnosis and follow-up | Disease characteristics treatment | Exposure assessment | Outcome (Events)   | Contrast        | RR (95% CI)      | Covariates |
|----------------------------------------------|-------------------|---------------------------------|-----------------------------------|---------------------|--------------------|-----------------|------------------|------------|
|                                              |                   |                                 |                                   |                     | Recurrence (n=532) | months vs never | 0.81 (0.65-1.00) |            |

Abbreviations: SBCCS, Shanghai Breast Cancer Genetics Study; WHEL; Women's Healthy Eating and Living

**Supplementary Table S22. Descriptive table of the included observational studies of post-diagnosis single vitamin supplementation and breast cancer prognosis**

| Author, year, study name, country, WCRF Code | Study description                                                                      | Time of diagnosis and follow-up             | Disease characteristics treatment                                                                                                             | Exposure assessment                                                            | Outcome (Events)             | Contrast                                                             | RR (95% CI)                      | Covariates                                                                                                                                                                                                       |
|----------------------------------------------|----------------------------------------------------------------------------------------|---------------------------------------------|-----------------------------------------------------------------------------------------------------------------------------------------------|--------------------------------------------------------------------------------|------------------------------|----------------------------------------------------------------------|----------------------------------|------------------------------------------------------------------------------------------------------------------------------------------------------------------------------------------------------------------|
| Madden <sup>89</sup><br>2018,<br>Ireland     | Retrospective cohort of cancer survivors (n=5417), age range: 50-80 years, race: White | Diagnosis: 2001-2011, follow-up: until 2012 | Stage I-III, ER+ 148.4%, ER- 31.6%, unspecified 19.9%, PR- 49.9%, PR+ 104.6%, unspecified 46.8%, HER2+ 23.8%, HER2- 123.7%, unspecified 52.4% | Pharmacy claims database, new vitamin D prescriptions dispensed post-diagnosis | All-cause mortality (n=1394) | Vitamin D supplementation, yes vs no                                 | 0.86 (0.72-1.01)<br>P trend<0.05 | Age at diagnosis, smoking status, comorbidity, tumour stage, tumour grade, ER status, PR status, HER2 status, bisphosphonate, chemotherapy, anti-oestrogen use, statins, NSAID use, anti-diabetic medication use |
|                                              |                                                                                        |                                             |                                                                                                                                               |                                                                                |                              | Vitamin D supplementation initiation, <180 days post-diagnosis vs no | 0.58 (0.44-0.76)                 |                                                                                                                                                                                                                  |
|                                              |                                                                                        |                                             |                                                                                                                                               |                                                                                |                              | Vitamin D supplementation initiation, ≥180 days post-diagnosis vs no | 0.95 (0.78-1.16)                 |                                                                                                                                                                                                                  |
|                                              |                                                                                        |                                             |                                                                                                                                               |                                                                                |                              | Vitamin D supplementation duration, 1-12 months vs no                | 0.80 (0.68-0.93)<br>P trend<0.05 |                                                                                                                                                                                                                  |

| Author, year, study name, country, WCRF Code | Study description | Time of diagnosis and follow-up | Disease characteristics treatment | Exposure assessment | Outcome (Events)                  | Contrast                                                             | RR (95% CI)                      | Covariates |
|----------------------------------------------|-------------------|---------------------------------|-----------------------------------|---------------------|-----------------------------------|----------------------------------------------------------------------|----------------------------------|------------|
|                                              |                   |                                 |                                   |                     |                                   | Vitamin D supplementation duration, >12 months vs no                 | 0.36 (0.30-0.42)<br>P trend<0.05 |            |
|                                              |                   |                                 |                                   |                     |                                   | Vitamin D supplementation, >400 IU/day vs 1-400 IU/ day              | 0.82 (0.69-0.99)<br>P trend<0.05 |            |
|                                              |                   |                                 |                                   |                     | Cancer specific mortality (n=806) | Vitamin D supplementation, yes vs no                                 | 0.80 (0.64-0.99)<br>P trend<0.05 |            |
|                                              |                   |                                 |                                   |                     |                                   | Vitamin D supplementation initiation, <180 days post-diagnosis vs no | 0.51 (0.34-0.74)                 |            |
|                                              |                   |                                 |                                   |                     |                                   | Vitamin D supplementation initiation, ≥180                           | 0.91 (0.70-1.18)                 |            |

| Author, year, study name, country, WCRF Code                    | Study description                                   | Time of diagnosis and follow-up            | Disease characteristics treatment        | Exposure assessment                | Outcome (Events)    | Contrast                                                | RR (95% CI)                      | Covariates                                                                                                                        |
|-----------------------------------------------------------------|-----------------------------------------------------|--------------------------------------------|------------------------------------------|------------------------------------|---------------------|---------------------------------------------------------|----------------------------------|-----------------------------------------------------------------------------------------------------------------------------------|
|                                                                 |                                                     |                                            |                                          |                                    |                     | days post-diagnosis vs no                               |                                  |                                                                                                                                   |
|                                                                 |                                                     |                                            |                                          |                                    |                     | Vitamin D supplementation duration, 1-12 months vs. no  | 0.73 (0.60-0.91)<br>P trend<0.05 |                                                                                                                                   |
|                                                                 |                                                     |                                            |                                          |                                    |                     | Vitamin D supplementation duration, >12 months vs no    | 0.33 (0.26-0.41)<br>P trend<0.05 |                                                                                                                                   |
|                                                                 |                                                     |                                            |                                          |                                    |                     | Vitamin D supplementation, >400 IU/day vs 1-400 IU/ day | 0.79 (0.62-1.01)                 |                                                                                                                                   |
| Inoue-Cho <sup>90</sup><br>2014, Iowa Women's Health Study, USA | Prospective cohort of cancer survivors (n=969), age | Diagnosis: 1986-2002, follow-up: 6.1 years | No information specific to breast cancer | FFQ, self-report, more than 1 year | All-cause mortality | Vitamin D supplementation, yes vs never                 | 0.75<br>(0.47-1.19)              | Age, energy intake, BMI, physical activity, smoking, comorbidity index, perceived general health, history of diabetes, history of |
|                                                                 |                                                     |                                            |                                          |                                    |                     | Vitamin C supplementation, yes vs never                 | 0.79<br>(0.58-1.08)              |                                                                                                                                   |

| Author, year, study name, country, WCRF Code | Study description  | Time of diagnosis and follow-up | Disease characteristics treatment | Exposure assessment | Outcome (Events) | Contrast                                        | RR (95% CI)         | Covariates                                                                                                                                                                                                |
|----------------------------------------------|--------------------|---------------------------------|-----------------------------------|---------------------|------------------|-------------------------------------------------|---------------------|-----------------------------------------------------------------------------------------------------------------------------------------------------------------------------------------------------------|
|                                              | range: 55-69 years |                                 |                                   |                     |                  | Vitamin E supplementation, yes vs never         | 0.80<br>(0.60-1.08) | high blood pressure, cancer stage, surgery, chemotherapy, number of cancers, current cancer treatment, years since cancer diagnosis, protein intake, total vegetable and fruit intake, whole grain intake |
|                                              |                    |                                 |                                   |                     |                  | Vitamin A supplementation, yes vs never         | 0.82<br>(0.43-1.57) |                                                                                                                                                                                                           |
|                                              |                    |                                 |                                   |                     |                  | B complex vitamin supplementation, yes vs never | 0.70<br>(0.41-1.18) |                                                                                                                                                                                                           |
|                                              |                    |                                 |                                   |                     |                  | Vitamin B6 supplementation, yes vs never        | 0.94<br>(0.58-1.51) |                                                                                                                                                                                                           |
|                                              |                    |                                 |                                   |                     |                  | Beta carotene supplementation, yes vs never     | 1.05 (0.46-2.41)    |                                                                                                                                                                                                           |
|                                              |                    |                                 |                                   |                     |                  | Folic acid supplementation, yes vs never        | 1.01 (0.60-1.70)    |                                                                                                                                                                                                           |

| Author, year, study name, country, WCRF Code | Study description | Time of diagnosis and follow-up | Disease characteristics treatment | Exposure assessment | Outcome (Events) | Contrast                                | RR (95% CI)       | Covariates |
|----------------------------------------------|-------------------|---------------------------------|-----------------------------------|---------------------|------------------|-----------------------------------------|-------------------|------------|
|                                              |                   |                                 |                                   |                     |                  | Calcium supplementation, yes vs never   | 0.83 (0.64-1.09)  |            |
|                                              |                   |                                 |                                   |                     |                  | Iron supplementation, yes vs never      | 1.60 (1.11-2.31)  |            |
|                                              |                   |                                 |                                   |                     |                  | Magnesium supplementation, yes vs never | 1.01 (0.57-1.8)   |            |
|                                              |                   |                                 |                                   |                     |                  | Selenium supplementation, yes vs never  | 0.74 (0.34-1.58)  |            |
|                                              |                   |                                 |                                   |                     |                  | Zinc supplementation, yes vs never      | 0.85 (0.50-1.44)  |            |
|                                              |                   |                                 |                                   |                     |                  | Copper supplementation, yes vs never    | 2.50 (0.59-10.65) |            |

| Author, year, study name, country, WCRF Code                        | Study description                                                                                                        | Time of diagnosis and follow-up                                                 | Disease characteristics treatment  | Exposure assessment                                                                                                                                       | Outcome (Events)                        | Contrast                             | RR (95% CI)      | Covariates                                                                                                                                                    |
|---------------------------------------------------------------------|--------------------------------------------------------------------------------------------------------------------------|---------------------------------------------------------------------------------|------------------------------------|-----------------------------------------------------------------------------------------------------------------------------------------------------------|-----------------------------------------|--------------------------------------|------------------|---------------------------------------------------------------------------------------------------------------------------------------------------------------|
| Harris <sup>91</sup><br>2013,<br>Swedish Mammography Cohort, Sweden | Population-based cohort study (n=3405), mean age: 65 years, pre- and post-menopausal                                     | Diagnosis: 1987-2010, follow-up: 7.8 years, 1055 deaths, 416 from breast cancer | Invasive breast cancer, stage I-IV | 67-item FFQ at baseline and a 96-item FFQ in 1997 dietary assessment occurred a mean of 4.6 years after breast cancer diagnosis range (1 year to 10 year) | Total mortality (n=228)                 | Vitamin C supplementation, yes vs no | 0.81 (0.53-1.26) | Age, energy intake, education, marital status, menopausal status, BMI, alcohol intake, year of diagnosis, tumour stage, tumour grade, radiotherapy, treatment |
|                                                                     |                                                                                                                          |                                                                                 |                                    |                                                                                                                                                           | Breast cancer-specific mortality (n=66) | Vitamin C supplementation, yes vs no | 1.06 (0.52-2.17) |                                                                                                                                                               |
| Poole <sup>86</sup><br>2013,<br>ABCPP, China and USA                | Consortium of four prospective cohort studies (n=12,019), age range: 20-83 years, pre- and post-menopausal, race: mostly | Diagnosis: 1976-2006, follow-up: mean 8.4 years                                 | Stage I-III                        | In-person interview or mailed questionnaire, self-reported, at least 1 year post-diagnosis                                                                | Total mortality (n=1298)                | Vitamin A supplementation, yes vs no | 1.06 (0.82-1.36) | Age at diagnosis, exercise, stage, treatment, BMI, menopausal status, smoking status                                                                          |
|                                                                     |                                                                                                                          |                                                                                 |                                    |                                                                                                                                                           |                                         | Vitamin B supplementation, yes vs no | 0.96 (0.81-1.15) |                                                                                                                                                               |
|                                                                     |                                                                                                                          |                                                                                 |                                    |                                                                                                                                                           |                                         | Vitamin C supplementation, yes vs no | 0.87 (0.76-1.01) |                                                                                                                                                               |



| Author, year, study name, country, WCRF Code | Study description | Time of diagnosis and follow-up | Disease characteristics treatment | Exposure assessment                  | Outcome (Events)                         | Contrast                             | RR (95% CI)      | Covariates |
|----------------------------------------------|-------------------|---------------------------------|-----------------------------------|--------------------------------------|------------------------------------------|--------------------------------------|------------------|------------|
|                                              | Asian and White   |                                 |                                   |                                      |                                          | Vitamin D supplementation, yes vs no | 0.95 (0.72-1.24) |            |
|                                              |                   |                                 |                                   |                                      |                                          | Vitamin E supplementation, yes vs no | 0.92 (0.79-1.07) |            |
|                                              |                   |                                 |                                   |                                      | Breast cancer specific mortality (n=849) | Vitamin A supplementation, yes vs no | 0.95 (0.68-1.34) |            |
|                                              |                   |                                 |                                   | Vitamin B supplementation, yes vs no |                                          | 0.98 (0.80-1.21)                     |                  |            |
|                                              |                   |                                 |                                   | Vitamin C supplementation, yes vs no |                                          | 0.94 (0.79-1.12)                     |                  |            |
|                                              |                   |                                 |                                   | Vitamin D supplementation, yes vs no |                                          | 0.97 (0.68-1.38)                     |                  |            |
|                                              |                   |                                 |                                   |                                      |                                          |                                      |                  |            |

| Author, year, study name, country, WCRF Code | Study description | Time of diagnosis and follow-up | Disease characteristics treatment | Exposure assessment             | Outcome (Events)    | Contrast                             | RR (95% CI)      | Covariates |
|----------------------------------------------|-------------------|---------------------------------|-----------------------------------|---------------------------------|---------------------|--------------------------------------|------------------|------------|
|                                              |                   |                                 |                                   |                                 |                     | Vitamin E supplementation, yes vs no | 0.89 (0.72-1.10) |            |
|                                              |                   |                                 |                                   |                                 | Recurrence (n=1325) | Vitamin A supplementation, yes vs no | 1.16 (0.80-1.70) |            |
|                                              |                   |                                 |                                   | Recurrence, ER-positive (n=79)  | 1.12 (0.88-1.43)    |                                      |                  |            |
|                                              |                   |                                 |                                   | Recurrence, ER-negative (n=18)  | 1.36 (0.82-2.24)    |                                      |                  |            |
|                                              |                   |                                 |                                   |                                 | Recurrence (n=1325) | Vitamin B supplementation, yes vs no | 0.94 (0.79-1.11) |            |
|                                              |                   |                                 |                                   | Recurrence, ER-positive (n=135) | 0.81 (0.68-0.98)    |                                      |                  |            |

| Author, year, study name, country, WCRF Code | Study description | Time of diagnosis and follow-up | Disease characteristics treatment | Exposure assessment             | Outcome (Events)               | Contrast                             | RR (95% CI)      | Covariates |
|----------------------------------------------|-------------------|---------------------------------|-----------------------------------|---------------------------------|--------------------------------|--------------------------------------|------------------|------------|
|                                              |                   |                                 |                                   |                                 | Recurrence, ER-negative (n=50) |                                      | 1.03 (0.76-1.40) |            |
|                                              |                   |                                 |                                   |                                 | Recurrence (n=1325)            | Vitamin C supplementation, yes vs no | 0.98 (0.85-1.12) |            |
|                                              |                   |                                 |                                   | Recurrence, ER-positive (n=331) | 0.92 (0.80-1.05)               |                                      |                  |            |
|                                              |                   |                                 |                                   | Recurrence, ER-negative (n=99)  | 0.87 (0.68-1.11)               |                                      |                  |            |
|                                              |                   |                                 |                                   |                                 | Recurrence (n=1325)            | Vitamin D supplementation, yes vs no | 0.92 (0.62-1.35) |            |
|                                              |                   |                                 |                                   | Recurrence, ER-positive (n=44)  | 0.64 (0.47-0.87)               |                                      |                  |            |
|                                              |                   |                                 |                                   | Recurrence, ER-negative (n=22)  | 1.25 (0.78-1.98)               |                                      |                  |            |

| Author, year, study name, country, WCRF Code         | Study description                                                                               | Time of diagnosis and follow-up                                                                                    | Disease characteristics treatment                                                                                                                     | Exposure assessment                                                      | Outcome (Events)                     | Contrast                                   | RR (95% CI)      | Covariates                                                                                                                                                                                             |
|------------------------------------------------------|-------------------------------------------------------------------------------------------------|--------------------------------------------------------------------------------------------------------------------|-------------------------------------------------------------------------------------------------------------------------------------------------------|--------------------------------------------------------------------------|--------------------------------------|--------------------------------------------|------------------|--------------------------------------------------------------------------------------------------------------------------------------------------------------------------------------------------------|
|                                                      |                                                                                                 |                                                                                                                    |                                                                                                                                                       |                                                                          | Recurrence (n=1325)                  | Vitamin E supplementation, yes vs no       | 0.90 (0.78-1.03) |                                                                                                                                                                                                        |
|                                                      |                                                                                                 |                                                                                                                    |                                                                                                                                                       |                                                                          | Recurrence, ER-positive (n=367)      |                                            | 0.89 (0.78-1.02) |                                                                                                                                                                                                        |
|                                                      |                                                                                                 |                                                                                                                    |                                                                                                                                                       |                                                                          | Recurrence, ER-negative (n=101)      |                                            | 0.90 (0.70-1.15) |                                                                                                                                                                                                        |
| Greenlee H <sup>92</sup> , 2012, LACE, United States | Prospective cohort of cancer survivors (n=2264), mean age: 58.3 years, pre- and post-menopausal | 1997-2000<br>Follow up= 10 years, until 2010 393 deaths, 214 breast cancer mortality, 375 breast cancer recurrence | Early-stage primary breast cancer<br><br>among those with data: 84.4% ER+ and/or PR+, 15.6% ER- and/PR-AJCC; 80.3% stage I or IIA 57.2% chemotherapy, | Questionnaire, self-administered, at on average 1.9 years post-diagnosis | Total mortality (n=314)              | Carotenoid supplementation, frequent vs no | 1.63 (1.06-2.5)  | Age at diagnosis, ethnicity, stage of disease, number of positive lymph nodes, hormone receptor status, chemotherapy, radiotherapy, hormonal therapy, BMI, smoking, alcohol intake, physical activity, |
|                                                      |                                                                                                 |                                                                                                                    |                                                                                                                                                       |                                                                          | Total mortality, chemotherapy (n=51) |                                            | 2.09 (1.21-3.61) |                                                                                                                                                                                                        |
|                                                      |                                                                                                 |                                                                                                                    |                                                                                                                                                       |                                                                          | Total mortality, radiotherapy (n=14) |                                            | 2.14 (1.20-3.82) |                                                                                                                                                                                                        |

| Author, year, study name, country, WCRF Code | Study description | Time of diagnosis and follow-up | Disease characteristics treatment            | Exposure assessment | Outcome (Events)                                 | Contrast | RR (95% CI)                      | Covariates                     |
|----------------------------------------------|-------------------|---------------------------------|----------------------------------------------|---------------------|--------------------------------------------------|----------|----------------------------------|--------------------------------|
|                                              |                   |                                 | 63% radiation therapy, 80.4% hormone therapy |                     | Total mortality, hormonal therapy (n=18)         |          | 1.66 (1.00-2.73)                 | fruit, vegetables, comorbidity |
|                                              |                   |                                 |                                              |                     | Breast mortality (n=166)                         |          | 1.93 (1.14-3.28)<br>P trend=0.03 |                                |
|                                              |                   |                                 |                                              |                     | Breast cancer mortality, chemotherapy (n=13)     |          | 2.54 (1.37-4.70)                 |                                |
|                                              |                   |                                 |                                              |                     | Breast cancer mortality, radiotherapy (n=10)     |          | 2.54 (1.28-5.05)                 |                                |
|                                              |                   |                                 |                                              |                     | Breast cancer mortality, hormonal therapy (n=12) |          | 2.14 (1.16-3.97)                 |                                |
|                                              |                   |                                 |                                              |                     | Recurrence (n=311)                               |          | 1.23 (0.76-1.96)                 |                                |

| Author, year, study name, country, WCRF Code | Study description | Time of diagnosis and follow-up | Disease characteristics treatment | Exposure assessment | Outcome (Events)                    | Contrast                                      | RR (95% CI)                      | Covariates |
|----------------------------------------------|-------------------|---------------------------------|-----------------------------------|---------------------|-------------------------------------|-----------------------------------------------|----------------------------------|------------|
|                                              |                   |                                 |                                   |                     |                                     |                                               | P trend=0.52                     |            |
|                                              |                   |                                 |                                   |                     | Recurrence, chemotherapy (n=15)     |                                               | 1.66 (0.96-2.88)                 |            |
|                                              |                   |                                 |                                   |                     | Recurrence, radiotherapy (n=11)     |                                               | 1.37 (0.73-2.57)                 |            |
|                                              |                   |                                 |                                   |                     | Recurrence, hormonal therapy (n=14) |                                               | 1.31 (0.75-2.27)                 |            |
|                                              |                   |                                 |                                   |                     | Total mortality (n=315)             | Beta carotene supplementation, frequent vs no | 1.18 (0.71-1.97)<br>P trend=0.41 |            |
|                                              |                   |                                 |                                   |                     | Breast cancer mortality (n=169)     |                                               | 1.33 (0.69-2.55)<br>P trend=0.34 |            |
|                                              |                   |                                 |                                   |                     | Recurrence (n=314)                  |                                               | 0.89 (0.50-1.60)<br>P trend=0.90 |            |

| Author, year, study name, country, WCRF Code | Study description | Time of diagnosis and follow-up | Disease characteristics treatment | Exposure assessment                                                                        | Outcome (Events)                                                                   | Contrast                                  | RR (95% CI)                          | Covariates |
|----------------------------------------------|-------------------|---------------------------------|-----------------------------------|--------------------------------------------------------------------------------------------|------------------------------------------------------------------------------------|-------------------------------------------|--------------------------------------|------------|
|                                              |                   |                                 |                                   |                                                                                            | Total mortality (n=314)<br><br>(Result superseded by Poole, 2013, ABCPP, SBR00601) | Vitamin E supplementation, frequent vs no | 0.75 (0.59-0.96)<br><br>P trend=0.02 |            |
|                                              |                   |                                 |                                   | Breast cancer mortality (n=168)<br><br>(Result superseded by Poole, 2013, ABCPP, SBR00601) | 0.85 (0.64-1.18)<br><br>P trend=0.34                                               |                                           |                                      |            |
|                                              |                   |                                 |                                   | Recurrence (n=312)<br><br>(Result superseded by Poole, 2013,                               | 0.70 (0.54-0.90)<br><br>P trend<0.01                                               |                                           |                                      |            |

| Author, year, study name, country, WCRF Code | Study description | Time of diagnosis and follow-up | Disease characteristics treatment | Exposure assessment | Outcome (Events)                    | Contrast                                 | RR (95% CI)                      | Covariates |
|----------------------------------------------|-------------------|---------------------------------|-----------------------------------|---------------------|-------------------------------------|------------------------------------------|----------------------------------|------------|
|                                              |                   |                                 |                                   |                     | ABCPP, SBR00601                     |                                          |                                  |            |
|                                              |                   |                                 |                                   |                     | Recurrence, chemotherapy (n=65)     |                                          | 0.79 (0.56-1.12)                 |            |
|                                              |                   |                                 |                                   |                     | Recurrence, radiotherapy (n=63)     |                                          | 0.70 (0.49-0.98)                 |            |
|                                              |                   |                                 |                                   |                     | Recurrence, hormonal therapy (n=81) |                                          | 0.70 (0.51-0.96)                 |            |
|                                              |                   |                                 |                                   |                     | Total mortality (n=316)             | Lycopene supplementation, frequent vs no | 1.38 (0.41-4.61)<br>P trend=0.46 |            |
|                                              |                   |                                 |                                   |                     | Breast cancer mortality (n=169)     |                                          | 2.09 (0.59-7.43)<br>P trend=0.15 |            |
|                                              |                   |                                 |                                   |                     | Recurrence (n=313)                  |                                          | 1.17 (0.35-3.89)                 |            |



| Author, year, study name, country, WCRF Code | Study description | Time of diagnosis and follow-up | Disease characteristics treatment | Exposure assessment             | Outcome (Events)                 | Contrast                                 | RR (95% CI)                      | Covariates |
|----------------------------------------------|-------------------|---------------------------------|-----------------------------------|---------------------------------|----------------------------------|------------------------------------------|----------------------------------|------------|
|                                              |                   |                                 |                                   |                                 |                                  |                                          | P trend=0.67                     |            |
|                                              |                   |                                 |                                   |                                 | Total mortality (n=318)          | Selenium supplementation, frequent vs no | 0.80 (0.45-1.41)<br>P trend=0.65 |            |
|                                              |                   |                                 |                                   | Breast cancer mortality (n=169) | 0.90 (0.45-1.79)<br>P trend=0.87 |                                          |                                  |            |
|                                              |                   |                                 |                                   | Recurrence (n=314)              | 0.89 (0.53-1.49)<br>P trend=0.75 |                                          |                                  |            |
|                                              |                   |                                 |                                   |                                 | Total mortality (n=317)          | Zinc supplementation, frequent vs no     | 0.75 (0.46-1.21)<br>P trend=0.29 |            |
|                                              |                   |                                 |                                   | Breast cancer mortality (n=168) | 0.82 (0.44-1.53)<br>P trend=0.29 |                                          |                                  |            |

| Author, year, study name, country, WCRF Code  | Study description                                                                    | Time of diagnosis and follow-up | Disease characteristics treatment                                                                                                                                                                                                 | Exposure assessment                          | Outcome (Events)                                                                    | Contrast                                    | RR (95% CI)                          | Covariates                                                                                                                     |
|-----------------------------------------------|--------------------------------------------------------------------------------------|---------------------------------|-----------------------------------------------------------------------------------------------------------------------------------------------------------------------------------------------------------------------------------|----------------------------------------------|-------------------------------------------------------------------------------------|---------------------------------------------|--------------------------------------|--------------------------------------------------------------------------------------------------------------------------------|
|                                               |                                                                                      |                                 |                                                                                                                                                                                                                                   |                                              | Recurrence (n=312)                                                                  |                                             | 0.79 (0.49-1.28)<br>P trend=0.26     |                                                                                                                                |
| Jacobs <sup>93</sup><br>2011,<br>WHEL,<br>USA | Nested case-control study within a prospective cohort (n=3085), mean age: 51.6 years | Follow-up: mean 7.3 years       | Invasive breast cancer, stage I 21.1%, II 48.1%, III 30.9% III, chemotherapy 80.3%, radiotherapy 62.7%, anti-oestrogen use 54.9%, Chemotherapy: 80.7% yes; Radiotherapy: 63.1% yes; Anti-oestrogen use: 64.5% yes, among controls | FFQ, at approximately 2 years post-diagnosis | Breast cancer recurrence<br><br>(Result superseded by Poole, 2013, ABCPP, SBR00601) | Vitamin D supplementation, no vs 538.7 IU/d | 1.08 (0.87-1.34)<br><br>P trend=0.47 | Age, ethnicity, BMI, intervention group, energy intake, stage of baseline cancer, and years between diagnosis and study entry. |
|                                               |                                                                                      |                                 |                                                                                                                                                                                                                                   |                                              | Breast cancer recurrence<br><br>Pre-menopausal women                                |                                             | 0.96 (0.61-1.52)<br><br>P trend=0.84 |                                                                                                                                |
|                                               |                                                                                      |                                 |                                                                                                                                                                                                                                   |                                              | Breast cancer recurrence<br><br>Post-menopausal women                               |                                             | 1.11 (0.86-1.41)<br><br>P trend=0.44 |                                                                                                                                |

| Author, year, study name, country, WCRF Code | Study description                        | Time of diagnosis and follow-up                   | Disease characteristics treatment                              | Exposure assessment                         | Outcome (Events)                                                                    | Contrast                                | RR (95% CI)                          | Covariates                                              |
|----------------------------------------------|------------------------------------------|---------------------------------------------------|----------------------------------------------------------------|---------------------------------------------|-------------------------------------------------------------------------------------|-----------------------------------------|--------------------------------------|---------------------------------------------------------|
|                                              |                                          |                                                   |                                                                |                                             | Breast cancer recurrence<br><br>(Result superseded by Poole, 2013, ABCPP, SBR00601) | Vitamin D supplementation, no vs yes    | 1.07 (0.88-1.29)<br><br>P trend=0.49 |                                                         |
|                                              |                                          |                                                   |                                                                |                                             | Breast cancer recurrence<br><br>Pre-menopausal women                                |                                         | 0.94 (0.65-1.37)<br><br>P trend=0.76 |                                                         |
|                                              |                                          |                                                   |                                                                |                                             | Breast cancer recurrence<br><br>Post-menopausal women                               |                                         | 1.10 (0.88-1.38)<br><br>P trend=0.38 |                                                         |
| Nechuta S <sup>82</sup> , 2011, SBCSS        | Prospective cohort (population-based) of | Diagnosed: 2002-2006<br>Follow up= 4.1 years, 444 | Invasive breast cancer 50.05%<br>ER+/PR+, 13%<br>ER+/PR-, 7.4% | Interviews conducted by trained interviewer | Total mortality (n=358)<br><br>(Results superseded by                               | Vitamin C supplementation, yes vs never | 0.81 (0.61-1.07)<br><br>P trend=0.13 | Receptor status, TNM stage, chemotherapy, radiotherapy, |

| Author, year, study name, country, WCRF Code | Study description                                                                      | Time of diagnosis and follow-up                                       | Disease characteristics treatment                                                                                                                                                   | Exposure assessment                                                     | Outcome (Events)                                                                                                                                                                                                                      | Contrast | RR (95% CI)                                                  | Covariates                                                                                                                     |
|----------------------------------------------|----------------------------------------------------------------------------------------|-----------------------------------------------------------------------|-------------------------------------------------------------------------------------------------------------------------------------------------------------------------------------|-------------------------------------------------------------------------|---------------------------------------------------------------------------------------------------------------------------------------------------------------------------------------------------------------------------------------|----------|--------------------------------------------------------------|--------------------------------------------------------------------------------------------------------------------------------|
|                                              | breast cancer survivors (n=4877) Pre- and postmenopausal<br><br>age range: 20-75 years | total deaths, 389 breast cancer mortality, 55 death from other causes | ER-/PR+, 27.7%<br>ER-/PR-, 1.9%<br>unknown TNM; 34.5% stage I, 50.9% stage IIA/IIB, 10.1% stage III-IV, 4.6% missing<br>chemotherapy 92.2%, radiotherapy 32.8%, tamoxifen use 51.7% | within 6 months post-diagnosis, (on average 6.5 months after diagnosis) | Poole, 2013, ABCPP, SBR00601<br><br>Breast cancer-specific mortality (n=316) (Results superseded by Poole, 2013, ABCPP, SBR00601)<br><br>Breast cancer recurrence (n=435)<br><br>(Results superseded by Poole, 2013, ABCPP, SBR00601) |          | 0.82 (0.61-1.10)<br><br>0.81 (0.63-1.03)<br><br>P trend=0.09 | tamoxifen use, education, income, BMI, tea consumption, exercise, cruciferous vegetables, soy protein, vitamin E, antioxidants |

| Author, year, study name, country, WCRF Code | Study description | Time of diagnosis and follow-up | Disease characteristics treatment | Exposure assessment      | Outcome (Events)        | Contrast                                                  | RR (95% CI)      | Covariates |
|----------------------------------------------|-------------------|---------------------------------|-----------------------------------|--------------------------|-------------------------|-----------------------------------------------------------|------------------|------------|
|                                              |                   |                                 |                                   |                          | Total mortality         | Duration of vitamin C supplementation, ≤3 months vs never | 1.08 (0.77-1.52) |            |
|                                              |                   |                                 |                                   | Breast cancer mortality  | 1.11 (0.78-1.58)        |                                                           |                  |            |
|                                              |                   |                                 |                                   | Breast cancer recurrence | 1.00 (0.74-1.37)        |                                                           |                  |            |
|                                              |                   |                                 |                                   |                          | Total mortality (n=435) | Duration of vitamin C supplementation, >3 months vs never | 0.56 (0.37-0.87) |            |
|                                              |                   |                                 |                                   | Breast cancer mortality  | 0.56 (0.35-0.88)        |                                                           | P trend=0.009    |            |
|                                              |                   |                                 |                                   | Breast cancer recurrence | 0.62 (0.43-0.90)        |                                                           | P trend=0.01     |            |

| Author, year, study name, country, WCRF Code | Study description | Time of diagnosis and follow-up | Disease characteristics treatment | Exposure assessment | Outcome (Events)                                                                              | Contrast                                | RR (95% CI)                      | Covariates |
|----------------------------------------------|-------------------|---------------------------------|-----------------------------------|---------------------|-----------------------------------------------------------------------------------------------|-----------------------------------------|----------------------------------|------------|
|                                              |                   |                                 |                                   |                     | Total mortality (n=319) (Results superseded by Poole, 2013, ABCPP, SBR00601)                  | Vitamin E supplementation, yes vs never | 0.71 (0.46-1.11)<br>P trend=0.13 |            |
|                                              |                   |                                 |                                   |                     | Breast cancer-specific mortality (n=278) (Results superseded by Poole, 2013, ABCPP, SBR00601) |                                         | 0.63 (0.38-1.04)                 |            |
|                                              |                   |                                 |                                   |                     | Breast cancer recurrence (n=382) (Results superseded by Poole, 2013, ABCPP, SBR00601)         |                                         | 0.65 (0.43-0.97)<br>P trend=0.04 |            |

| Author, year, study name, country, WCRF Code | Study description | Time of diagnosis and follow-up | Disease characteristics treatment | Exposure assessment      | Outcome (Events) | Contrast                                                  | RR (95% CI)      | Covariates |
|----------------------------------------------|-------------------|---------------------------------|-----------------------------------|--------------------------|------------------|-----------------------------------------------------------|------------------|------------|
|                                              |                   |                                 |                                   |                          | Total mortality  | Duration of vitamin E supplementation, ≤3 months vs never | 0.97 (0.55-1.70) |            |
|                                              |                   |                                 |                                   | Breast cancer mortality  | 0.76 (0.39-1.49) |                                                           |                  |            |
|                                              |                   |                                 |                                   | Breast cancer recurrence | 0.74 (0.42-1.29) |                                                           | P trend=0.29     |            |
|                                              |                   |                                 |                                   |                          | Total mortality  | Duration of vitamin E supplementation, >3 months vs never | 0.52 (0.27-1.01) |            |
|                                              |                   |                                 |                                   | Breast cancer mortality  | 0.53 (0.26-1.07) |                                                           | P trend=0.05     |            |

| Author, year, study name, country, WCRF Code                                                                     | Study description                              | Time of diagnosis and follow-up                                            | Disease characteristics treatment | Exposure assessment                                                                                                | Outcome (Events)              | Contrast                                    | RR (95% CI)                      | Covariates                                                                                                         |
|------------------------------------------------------------------------------------------------------------------|------------------------------------------------|----------------------------------------------------------------------------|-----------------------------------|--------------------------------------------------------------------------------------------------------------------|-------------------------------|---------------------------------------------|----------------------------------|--------------------------------------------------------------------------------------------------------------------|
|                                                                                                                  |                                                |                                                                            |                                   |                                                                                                                    | Breast cancer recurrence      |                                             | 0.57 (0.32-1.01)<br>P trend=0.05 |                                                                                                                    |
| Bruemme <sup>94</sup> , 2003, Fred Hutchinson Cancer Research Center Nutritional Supplement Follow-up study, USA | Prospective cohort of cancer survivors (n=99)  | Recruited: 1994-1997<br>Follow up= 2 years, until 2 years after transplant |                                   | Questionnaire was conducted approximately two weeks before initiation of the radiation and/or chemotherapy regimen | Non-relapse mortality         | Vitamin C supplementation, ≥500mg/day vs no | 0.80 (0.27-2.41)<br>P trend=0.58 | Age, tumour stage                                                                                                  |
|                                                                                                                  |                                                |                                                                            |                                   |                                                                                                                    | Relapse-free recurrence       |                                             | 0.11 (0.02-0.89)<br>P trend=0.03 |                                                                                                                    |
|                                                                                                                  |                                                |                                                                            |                                   |                                                                                                                    | Mortality or recurrence       |                                             | 0.41 (0.17-1.02)<br>P trend=0.04 |                                                                                                                    |
| Fleischauer AT <sup>87</sup> , 2003, FASTCAB, United States                                                      | (n= 385) Post-menopausal, mean age: 62.1 years | Diagnosed: 1986-1988<br>Follow up= 14 years, until 1999                    | Invasive breast cancer            | Questionnaire, self-administered                                                                                   | Disease-free survival (n=220) | Vitamin C supplementation, yes vs no        | 0.64 (0.32-1.27)                 | Age at diagnosis, age at menopause, tumour stage, tamoxifen use, radiotherapy, hormonal therapy, smoking, physical |
|                                                                                                                  |                                                |                                                                            |                                   |                                                                                                                    |                               | Vitamin C supplementation                   | 0.90 (0.35-2.23)                 |                                                                                                                    |



| Author, year, study name, country, WCRF Code | Study description | Time of diagnosis and follow-up | Disease characteristics treatment | Exposure assessment | Outcome (Events) | Contrast                                              | RR (95% CI)      | Covariates                |
|----------------------------------------------|-------------------|---------------------------------|-----------------------------------|---------------------|------------------|-------------------------------------------------------|------------------|---------------------------|
|                                              |                   |                                 |                                   |                     |                  | post-diagnosis, yes vs no                             |                  | activity, dietary factors |
|                                              |                   |                                 |                                   |                     |                  | Duration of vitamin C supplementation, >4 years vs no | 0.34 (0.11-0.97) |                           |
|                                              |                   |                                 |                                   |                     |                  | Vitamin E supplementation, yes vs no                  | 0.55 (0.28-1.08) |                           |
|                                              |                   |                                 |                                   |                     |                  | Vitamin E supplementation post-diagnosis, yes vs no   | 0.75 (0.34-1.76) |                           |
|                                              |                   |                                 |                                   |                     |                  | Duration of vitamin E supplementation, >3 years vs no | 0.33 (0.10-1.07) |                           |

| Author, year, study name, country, WCRF Code | Study description                                                                                           | Time of diagnosis and follow-up                     | Disease characteristics treatment                                                                                                                                                                                          | Exposure assessment | Outcome (Events)             | Contrast                                                 | RR (95% CI)                          | Covariates                                                                              |
|----------------------------------------------|-------------------------------------------------------------------------------------------------------------|-----------------------------------------------------|----------------------------------------------------------------------------------------------------------------------------------------------------------------------------------------------------------------------------|---------------------|------------------------------|----------------------------------------------------------|--------------------------------------|-----------------------------------------------------------------------------------------|
| Zeichner <sup>95</sup><br>2015, USA          | Retrospective cohort of cancer survivors (n=134), mean age: 54 years, race: Hispanic and Non-Hispanic White | Diagnosis: 2006-2012, follow-up: median 29.5 months | Nonmetastatic, grade low/intermediate 39.7%, high 60.3%, HER2+ 100%, ER+ 63.6%, PR+ 53.0%,<br><br>neoadjuvant chemotherapy 100%, mastectomy 60.6%, lumpectomy 34.9%, no surgery 4.6%, radiation 88%, hormone therapy 58.1% | Medical records     | Overall survival (n=21)      | Vitamin D supplementation during chemotherapy, yes vs no | 0.30 (0.07-1.37)<br><br>P trend=0.12 | Age at diagnosis, BMI, er status, histological grade, lymph node metastasis, tumor size |
|                                              |                                                                                                             |                                                     |                                                                                                                                                                                                                            |                     | Disease-free survival (n=89) |                                                          | 0.36 (0.15-0.88)<br><br>P trend=0.26 |                                                                                         |

| Author, year, study name, country, WCRF Code     | Study description                                                                        | Time of diagnosis and follow-up                             | Disease characteristics treatment                                                                                                                                                                                                                         | Exposure assessment                           | Outcome (Events)                  | Contrast                             | RR (95% CI)          | Covariates                                                                                                                                                                                                                                                   |
|--------------------------------------------------|------------------------------------------------------------------------------------------|-------------------------------------------------------------|-----------------------------------------------------------------------------------------------------------------------------------------------------------------------------------------------------------------------------------------------------------|-----------------------------------------------|-----------------------------------|--------------------------------------|----------------------|--------------------------------------------------------------------------------------------------------------------------------------------------------------------------------------------------------------------------------------------------------------|
| Jung <sup>84</sup><br>2019,<br>MARIE,<br>Germany | Prospective cohort of cancer survivors (n=2223), age range: 58-66 years, post-menopausal | Diagnosis: 2002-2005, follow-up: median 6 years, until 2015 | Stage I-IV, grade low 19.6%, moderate 49.3%, high 21.9%, ER+/PR-+ 60.7%, ER+ or PR+ 16.8%, ER-/PR- 13.5%, HER2+ 15.4%, HER2- 68.0%, mastectomy 26.1%, breast-conserving therapy 73.7%, chemotherapy 45.8%, radiation therapy 70.9%, hormone therapy 80.7% | Interview, at median 5.8 years post-diagnosis | All-cause mortality (n=278)       | Magnesium supplementation, yes vs no | 1.02 (0.73-1.42)     | Age, alcohol intake, BMI, cardiovascular disease, chemotherapy, detection type, diabetes, education, hormone receptor status, menopausal hormone therapy use, nodal status, other factors, physical activity, radiotherapy, smoking, tumor grade, tumor size |
|                                                  |                                                                                          |                                                             |                                                                                                                                                                                                                                                           |                                               | Cancer specific mortality (n=154) |                                      | 0.97 (0.60-1.55)     |                                                                                                                                                                                                                                                              |
|                                                  |                                                                                          |                                                             |                                                                                                                                                                                                                                                           |                                               | Recurrence (n=428)                |                                      | 0.99 (0.74-1.33)     |                                                                                                                                                                                                                                                              |
|                                                  |                                                                                          |                                                             |                                                                                                                                                                                                                                                           |                                               | All-cause mortality (n=270)       | Calcium supplementation, yes vs no   | 0.79 (0.54-1.14)     |                                                                                                                                                                                                                                                              |
|                                                  |                                                                                          |                                                             |                                                                                                                                                                                                                                                           |                                               | Cancer specific mortality (n=150) |                                      | 0.74 (0.44-1.24)     |                                                                                                                                                                                                                                                              |
|                                                  |                                                                                          |                                                             |                                                                                                                                                                                                                                                           |                                               | Recurrence (n=423)                |                                      | 0.87 (0.65-1.16)     |                                                                                                                                                                                                                                                              |
|                                                  |                                                                                          |                                                             |                                                                                                                                                                                                                                                           |                                               | All-cause mortality (n=296)       |                                      | Magnesium or calcium |                                                                                                                                                                                                                                                              |

| Author, year, study name, country, WCRF Code | Study description                                                                                                                   | Time of diagnosis and follow-up                   | Disease characteristics treatment                                                                                                                                     | Exposure assessment                                          | Outcome (Events)                  | Contrast                                                     | RR (95% CI)      | Covariates                                                                                                                                                     |
|----------------------------------------------|-------------------------------------------------------------------------------------------------------------------------------------|---------------------------------------------------|-----------------------------------------------------------------------------------------------------------------------------------------------------------------------|--------------------------------------------------------------|-----------------------------------|--------------------------------------------------------------|------------------|----------------------------------------------------------------------------------------------------------------------------------------------------------------|
|                                              |                                                                                                                                     |                                                   |                                                                                                                                                                       |                                                              | Cancer specific mortality (n=163) | supplementation, yes vs no                                   | 0.86 (0.57-1.29) |                                                                                                                                                                |
|                                              |                                                                                                                                     |                                                   |                                                                                                                                                                       |                                                              | Recurrence (n=460)                |                                                              | 0.92 (0.73-1.17) |                                                                                                                                                                |
| Ambrosone <sup>83</sup> 2020, DELCaP, USA    | Secondary analysis of clinical trials (n=1134), age range: 23-80 years, pre-menopausal 47%, post-menopausal 52%, race: mostly White | Diagnosis: 2003-2010, follow-up: median 8.1 years | Stage II-III, ER+ or PR+ 65%, ER- or PR- 35%, HER2+ 21%, radical mastectomy or local excision of all tumours plus axillary node dissection or sentinel node resection | Questionnaire, self-administered, at 6 months post-diagnosis | All-cause mortality               | Vitamin C supplementation, during treatment vs no            | 1.15 (0.58-2.31) | Age, alcohol intake, BMI, er status, her2 status, lymph node status, multivitamins, physical activity, PR status, smoking, toxicity, treatment arm, tumor size |
|                                              |                                                                                                                                     |                                                   |                                                                                                                                                                       |                                                              | Disease-free survival             |                                                              | 1.14 (0.64-2.03) |                                                                                                                                                                |
|                                              |                                                                                                                                     |                                                   |                                                                                                                                                                       |                                                              | All-cause mortality               | Vitamin C supplementation, before treatment vs no            | 1.27 (0.83-1.93) |                                                                                                                                                                |
|                                              |                                                                                                                                     |                                                   |                                                                                                                                                                       |                                                              | Disease-free survival             |                                                              | 1.04 (0.72-1.52) |                                                                                                                                                                |
|                                              |                                                                                                                                     |                                                   |                                                                                                                                                                       |                                                              | All-cause mortality               | Vitamin C supplementation, before and during treatment vs no | 1.37 (0.80-2.34) |                                                                                                                                                                |
|                                              |                                                                                                                                     |                                                   |                                                                                                                                                                       |                                                              | Disease-free survival             |                                                              | 1.31 (0.83-2.08) |                                                                                                                                                                |

| Author, year, study name, country, WCRF Code | Study description | Time of diagnosis and follow-up | Disease characteristics treatment | Exposure assessment | Outcome (Events)      | Contrast                                                     | RR (95% CI)       | Covariates |
|----------------------------------------------|-------------------|---------------------------------|-----------------------------------|---------------------|-----------------------|--------------------------------------------------------------|-------------------|------------|
|                                              |                   |                                 |                                   |                     | All-cause mortality   | Vitamin A supplementation, during treatment vs no            | 1.25 (0.45-3.49)  |            |
|                                              |                   |                                 |                                   |                     | Disease-free survival |                                                              | 1.51 (0.70-3.29)  |            |
|                                              |                   |                                 |                                   |                     | All-cause mortality   | Vitamin A supplementation, before treatment vs no            | 0.66 (0.24-1.83)  |            |
|                                              |                   |                                 |                                   |                     | Disease-free survival |                                                              | 0.71 (0.31-1.63)  |            |
|                                              |                   |                                 |                                   |                     | All-cause mortality   | Vitamin A supplementation, before and during treatment vs no | 3.20 (0.93-10.99) |            |
|                                              |                   |                                 |                                   |                     | Disease-free survival |                                                              | 4.06 (1.26-13.16) |            |
|                                              |                   |                                 |                                   |                     | All-cause mortality   | Vitamin E supplementation, during treatment vs no            | 1.19 (0.55-2.58)  |            |
|                                              |                   |                                 |                                   |                     | Disease-free survival |                                                              | 1.13 (0.59-2.16)  |            |
|                                              |                   |                                 |                                   |                     | All-cause mortality   | Vitamin E supplementation,                                   | 1.04 (0.66-1.62)  |            |

| Author, year, study name, country, WCRF Code | Study description | Time of diagnosis and follow-up | Disease characteristics treatment | Exposure assessment   | Outcome (Events)      | Contrast                                                        | RR (95% CI)      | Covariates |
|----------------------------------------------|-------------------|---------------------------------|-----------------------------------|-----------------------|-----------------------|-----------------------------------------------------------------|------------------|------------|
|                                              |                   |                                 |                                   |                       | Disease-free survival | before treatment vs no                                          | 0.98 (0.67-1.44) |            |
|                                              |                   |                                 |                                   |                       | All-cause mortality   | Vitamin E supplementation, before and during treatment vs no    | 1.39 (0.68-2.82) |            |
|                                              |                   |                                 |                                   | Disease-free survival | 1.38 (0.75-2.54)      |                                                                 |                  |            |
|                                              |                   |                                 |                                   |                       | All-cause mortality   | Coenzyme Q10 supplementation, during treatment vs no            | 1.34 (0.49-3.67) |            |
|                                              |                   |                                 |                                   | Disease-free survival | 1.35 (0.59-3.06)      |                                                                 |                  |            |
|                                              |                   |                                 |                                   |                       | All-cause mortality   | Coenzyme Q10 supplementation, before treatment vs no            | 1.08 (0.47-2.48) |            |
|                                              |                   |                                 |                                   | Disease-free survival | 1.28 (0.65-2.51)      |                                                                 |                  |            |
|                                              |                   |                                 |                                   |                       | All-cause mortality   | Coenzyme Q10 supplementation, during and before treatment vs no | 1.88 (0.75-4.76) |            |
|                                              |                   |                                 |                                   | Disease-free survival | 1.68 (0.73-3.89)      |                                                                 |                  |            |

| Author, year, study name, country, WCRF Code | Study description | Time of diagnosis and follow-up | Disease characteristics treatment | Exposure assessment | Outcome (Events)      | Contrast                                                      | RR (95% CI)       | Covariates |
|----------------------------------------------|-------------------|---------------------------------|-----------------------------------|---------------------|-----------------------|---------------------------------------------------------------|-------------------|------------|
|                                              |                   |                                 |                                   |                     | All-cause mortality   | Carotenoid supplementation, during treatment vs no            | 3.21 (0.97-10.61) |            |
|                                              |                   |                                 |                                   |                     | Disease-free survival |                                                               | 3.20 (1.16-8.87)  |            |
|                                              |                   |                                 |                                   |                     | All-cause mortality   | Carotenoid supplementation, before treatment vs no            | 0.74 (0.18-3.04)  |            |
|                                              |                   |                                 |                                   |                     | Disease-free survival |                                                               | 0.99 (0.36-2.70)  |            |
|                                              |                   |                                 |                                   |                     | All-cause mortality   | Carotenoid supplementation, before and during treatment vs no | 1.50 (0.35-6.55)  |            |
|                                              |                   |                                 |                                   |                     | Disease-free survival |                                                               | 2.24 (0.68-7.37)  |            |
|                                              |                   |                                 |                                   |                     | All-cause mortality   | Vitamin D supplementation, during treatment vs no             | 1.05 (0.66-1.65)  |            |
|                                              |                   |                                 |                                   |                     | Disease-free survival |                                                               | 1.19 (0.81-1.74)  |            |
|                                              |                   |                                 |                                   |                     | All-cause mortality   | Vitamin D supplementation,                                    | 1.07 (0.65-1.77)  |            |

| Author, year, study name, country, WCRF Code | Study description | Time of diagnosis and follow-up | Disease characteristics treatment | Exposure assessment   | Outcome (Events)      | Contrast                                                      | RR (95% CI)      | Covariates |
|----------------------------------------------|-------------------|---------------------------------|-----------------------------------|-----------------------|-----------------------|---------------------------------------------------------------|------------------|------------|
|                                              |                   |                                 |                                   |                       | Disease-free survival | before treatment vs no                                        | 0.96 (0.62-1.48) |            |
|                                              |                   |                                 |                                   |                       | All-cause mortality   | Vitamin D supplementation, before and during treatment vs no  | 1.11 (0.67-1.82) |            |
|                                              |                   |                                 |                                   | Disease-free survival | 1.22 (0.81-1.84)      |                                                               |                  |            |
|                                              |                   |                                 |                                   |                       | All-cause mortality   | Vitamin B6 supplementation, during treatment vs no            | 0.97 (0.64-1.47) |            |
|                                              |                   |                                 |                                   | Disease-free survival | 0.89 (0.63-1.27)      |                                                               |                  |            |
|                                              |                   |                                 |                                   |                       | All-cause mortality   | Vitamin B6 supplementation, before treatment vs no            | 0.79 (0.39-1.60) |            |
|                                              |                   |                                 |                                   | Disease-free survival | 0.65 (0.35-1.22)      |                                                               |                  |            |
|                                              |                   |                                 |                                   |                       | All-cause mortality   | Vitamin B6 supplementation, before and during treatment vs no | 1.13 (0.56-2.29) |            |
|                                              |                   |                                 |                                   | Disease-free survival | 1.07 (0.58-1.96)      |                                                               |                  |            |



| Author, year, study name, country, WCRF Code | Study description | Time of diagnosis and follow-up | Disease characteristics treatment | Exposure assessment | Outcome (Events)      | Contrast                                                       | RR (95% CI)      | Covariates |
|----------------------------------------------|-------------------|---------------------------------|-----------------------------------|---------------------|-----------------------|----------------------------------------------------------------|------------------|------------|
|                                              |                   |                                 |                                   |                     | All-cause mortality   | Vitamin B12 supplementation, during treatment vs no            | 0.85 (0.44-1.64) |            |
|                                              |                   |                                 |                                   |                     | Disease-free survival |                                                                | 1.08 (0.66-1.77) |            |
|                                              |                   |                                 |                                   |                     | All-cause mortality   | Vitamin B12 supplementation, before treatment vs no            | 0.70 (0.36-1.36) |            |
|                                              |                   |                                 |                                   |                     | Disease-free survival |                                                                | 0.80 (0.47-1.36) |            |
|                                              |                   |                                 |                                   |                     | All-cause mortality   | Vitamin B12 supplementation, before and during treatment vs no | 1.91 (1.13-3.22) |            |
|                                              |                   |                                 |                                   |                     | Disease-free survival |                                                                | 1.77 (1.10-2.84) |            |
|                                              |                   |                                 |                                   |                     | All-cause mortality   | Iron supplementation, during treatment vs no                   | 1.67 (1.02-2.72) |            |
|                                              |                   |                                 |                                   |                     | Disease-free survival |                                                                | 1.79 (1.18-2.70) |            |
|                                              |                   |                                 |                                   |                     | All-cause mortality   | Iron supplementation,                                          | 0.50 (0.20-1.26) |            |

| Author, year, study name, country, WCRF Code | Study description | Time of diagnosis and follow-up | Disease characteristics treatment | Exposure assessment   | Outcome (Events)      | Contrast                                                      | RR (95% CI)      | Covariates |
|----------------------------------------------|-------------------|---------------------------------|-----------------------------------|-----------------------|-----------------------|---------------------------------------------------------------|------------------|------------|
|                                              |                   |                                 |                                   |                       | Disease-free survival | before treatment vs no                                        | 0.58 (0.28-1.19) |            |
|                                              |                   |                                 |                                   |                       | All-cause mortality   | Iron supplementation, before and during treatment vs no       | 1.80 (0.85-3.84) |            |
|                                              |                   |                                 |                                   | Disease-free survival | 1.88 (0.96-3.67)      |                                                               |                  |            |
|                                              |                   |                                 |                                   |                       | All-cause mortality   | Folic acid supplementation, during treatment vs no            | 1.11 (0.58-2.16) |            |
|                                              |                   |                                 |                                   | Disease-free survival | 1.21 (0.72-2.04)      |                                                               |                  |            |
|                                              |                   |                                 |                                   |                       | All-cause mortality   | Folic acid supplementation, before treatment vs no            | 0.63 (0.32-1.22) |            |
|                                              |                   |                                 |                                   | Disease-free survival | 0.72 (0.42-1.21)      |                                                               |                  |            |
|                                              |                   |                                 |                                   |                       | All-cause mortality   | Folic acid supplementation, before and during treatment vs no | 1.70 (0.84-3.43) |            |
|                                              |                   |                                 |                                   | Disease-free survival | 1.32 (0.68-2.54)      |                                                               |                  |            |

| Author, year, study name, country, WCRF Code | Study description | Time of diagnosis and follow-up | Disease characteristics treatment | Exposure assessment | Outcome (Events)      | Contrast                                                   | RR (95% CI)      | Covariates |
|----------------------------------------------|-------------------|---------------------------------|-----------------------------------|---------------------|-----------------------|------------------------------------------------------------|------------------|------------|
|                                              |                   |                                 |                                   |                     | All-cause mortality   | Calcium supplementation, during treatment vs no            | 0.96 (0.55-1.66) |            |
|                                              |                   |                                 |                                   |                     | Disease-free survival |                                                            | 1.17 (0.76-1.80) |            |
|                                              |                   |                                 |                                   |                     | All-cause mortality   | Calcium supplementation, before treatment vs no            | 1.49 (0.99-2.24) |            |
|                                              |                   |                                 |                                   |                     | Disease-free survival |                                                            | 1.24 (0.87-1.78) |            |
|                                              |                   |                                 |                                   |                     | All-cause mortality   | Calcium supplementation, before and during treatment vs no | 1.19 (0.77-1.84) |            |
|                                              |                   |                                 |                                   |                     | Disease-free survival |                                                            | 1.20 (0.84-1.74) |            |

Abbreviations: ABCPP, After Breast Cancer Pooling Project; LACE, Life After Cancer Epidemiology; NHS, Nurses' Health Study; SBCCS, Shanghai Breast Cancer Genetics Study; WHEL; Women's Healthy Eating and Living

**Supplementary Table S23. Descriptive table of the included observational studies of post-diagnosis vitamin D from diet and/or supplements and breast cancer prognosis**

| Author, year, study name, country, WCRF Code | Study description                                                                                           | Time of diagnosis and follow-up                     | Disease characteristics treatment                                                                                                                                                                                          | Exposure assessment | Outcome Events               | Contrast                                                  | RR (95% CI)                          | Covariates                                                                                            |
|----------------------------------------------|-------------------------------------------------------------------------------------------------------------|-----------------------------------------------------|----------------------------------------------------------------------------------------------------------------------------------------------------------------------------------------------------------------------------|---------------------|------------------------------|-----------------------------------------------------------|--------------------------------------|-------------------------------------------------------------------------------------------------------|
| Zeichner <sup>95</sup><br>2015, USA          | Retrospective cohort of cancer survivors (n=134), mean age: 54 years, race: Hispanic and Non-Hispanic White | Diagnosis: 2006-2012, follow-up: median 29.5 months | Nonmetastatic, grade low/intermediate 39.7%, high 60.3%, HER2+ 100%, ER+ 63.6%, PR+ 53.0%,<br><br>neoadjuvant chemotherapy 100%, mastectomy 60.6%, lumpectomy 34.9%, no surgery 4.6%, radiation 88%, hormone therapy 58.1% | Medical records     | All-cause mortality (n=21)   | From supplements<br><br>Use vs non-use                    | 0.30 (0.07-1.37)<br><br>P trend=0.12 | Age at diagnosis, Tumour size, Lymph node metastasis, Histological grade, ER status, BMI              |
|                                              |                                                                                                             |                                                     |                                                                                                                                                                                                                            |                     | Disease-free survival (n=89) |                                                           | 0.36 (0.15-0.88)<br><br>P trend=0.26 |                                                                                                       |
| Beasley <sup>33</sup><br>2011, CWLS, USA     | Follow up of 4441 pre- and post-menopausal women diagnosed with                                             | Diagnosed between 1987 and 1999                     | Primary invasive breast cancer; Stages: 72.8% local, 27.2% regional<br>Surgery: 97.9%; Radiotherapy: 49.8%; Hormonal therapy:                                                                                              | Validated FFQ       | All-cause mortality (n=525)  | Q5 vs. Q1 mg/day<br><br>(from diet and supplements-total) | 0.86 (0.64-1.16)<br><br>P trend=0.35 | Age, state of residence, menopausal status, smoking, breast cancer stage, alcohol, history of hormone |

|                                             |                                                                                                                         |                          |                                                                                                                                                             |                     |                                                                       |                                                                           |                                                              |                                                                                                                                                                            |
|---------------------------------------------|-------------------------------------------------------------------------------------------------------------------------|--------------------------|-------------------------------------------------------------------------------------------------------------------------------------------------------------|---------------------|-----------------------------------------------------------------------|---------------------------------------------------------------------------|--------------------------------------------------------------|----------------------------------------------------------------------------------------------------------------------------------------------------------------------------|
|                                             | invasive breast cancer<br><br>Age range: 20-79                                                                          | Mean follow up=5.5 years | 57.8%;<br>Chemotherapy: 31.9%                                                                                                                               |                     | Breast cancer-mortality<br><br>(n=137)                                | Q5 vs. Q1 mg/day<br><br>(from diet and supplements-total)                 | 1.02 (0.58-1.79)<br><br>P trend=0.90                         | replacement therapy), interval between diagnosis and diet assessment, energy intake, breast cancer treatment, body mass index, and physical activity                       |
| Saquist <sup>96</sup><br>2011,<br>WHEL, USA | Prospective cohort of 3081 pre- and post-menopausal women diagnosed with invasive breast cancer<br><br>Age: 18–70 years | Median follow up=9 years | Primary invasive breast cancer, stages I(>=1cm), II (56.4%), or IIIA<br><br>Chemotherapy: 70%                                                               | 24 Hour Diet Recall | All-cause mortality<br><br>(n=388)                                    | above UL vs. adequate intake mcg<br><br>(from diet and supplements-total) | 0.9 (0.13-7.11)                                              | Age at randomization, tumor stage, tumor grade, time since diagnosis, BMI, smoking, randomisation group, Hot flashes, Group by hot flashes interaction and physical health |
| Jacobs <sup>93</sup><br>2011,<br>WHEL, USA  | Matched case-control study (of 512 matched pairs)<br><br>Mean (SD) age: 51.6 +/- 9.5 years                              | Mean follow up=7.3 years | Invasive:512 69.5% ER+, 29.3% ER- among cases; 73.4% ER+, 25.4% ER- among controls<br>Stages: 21.1% I, 48.1% II, 30.9% III among cases and controls; Tumour | FFQ                 | Breast cancer recurrence<br><br>All participants<br><br>Premenopausal | Lowest vs. highest tertile<br><br>(from diet and supplements-total)       | 1.07 (0.85-1.34)<br><br>P trend=0.57<br><br>1.17 (0.73-1.89) | Age, ethnicity, BMI, intervention group, energy intake, stage of baseline cancer, and years between diagnosis and study entry                                              |

|                                       |                                             |                         |                                                                                                                                                                                                                                                                |               |                             |                            |                                  |                                                             |
|---------------------------------------|---------------------------------------------|-------------------------|----------------------------------------------------------------------------------------------------------------------------------------------------------------------------------------------------------------------------------------------------------------|---------------|-----------------------------|----------------------------|----------------------------------|-------------------------------------------------------------|
|                                       |                                             |                         | grades: 8.4% I, 37.9% II, 45.1% III among cases, 11.1%<br>Chemotherapy: 80.3% yes;<br>Radiotherapy 62.7% yes; Anti-oestrogen use 54.9% yes, among cases;<br>Chemotherapy: 80.7% yes;<br>Radiotherapy: 63.1% yes; Anti-oestrogen use: 64.5% yes, among controls |               |                             |                            | P trend=0.49                     |                                                             |
|                                       |                                             |                         |                                                                                                                                                                                                                                                                |               | Postmenopausal              |                            | 1.01 (0.78-1.32)                 |                                                             |
|                                       |                                             |                         |                                                                                                                                                                                                                                                                |               | Breast cancer recurrence    | Lowest vs. highest tertile | 1.17 (0.93-1.49)                 |                                                             |
|                                       |                                             |                         |                                                                                                                                                                                                                                                                |               | All participants            | (from diet only)           | P trend=0.18                     |                                                             |
|                                       |                                             |                         |                                                                                                                                                                                                                                                                |               | Premenopausal               |                            | 1.72 (1.08-2.74)                 |                                                             |
|                                       |                                             |                         |                                                                                                                                                                                                                                                                |               |                             |                            | P trend=0.02                     |                                                             |
|                                       |                                             |                         |                                                                                                                                                                                                                                                                |               | Postmenopausal              |                            | 1.04 (0.79-1.37)                 |                                                             |
|                                       |                                             |                         |                                                                                                                                                                                                                                                                |               |                             |                            | P trend=0.77                     |                                                             |
| Holmes <sup>34</sup> , 1999, NHS, USA | Population-based prospective cohort of 1982 | Mean follow up=13 years | Invasive breast carcinoma; Grade 1-3                                                                                                                                                                                                                           | Validated FFQ | All-cause mortality (n=378) | Q5 vs. Q1                  | 0.86 (0.62-1.17)<br>P trend=0.21 | Age, Time between exposure assessment and cancer diagnosis, |

|  |                                                                      |              |  |  |                             |                             |                                  |                                                                                                                                                       |
|--|----------------------------------------------------------------------|--------------|--|--|-----------------------------|-----------------------------|----------------------------------|-------------------------------------------------------------------------------------------------------------------------------------------------------|
|  | pre- and post-menopausal women diagnosed with invasive breast cancer | (157 months) |  |  |                             | (from diet and supplements) |                                  | Year of diagnosis, Oral contraceptive, Hormonal therapy, Smoking, Age at first birth, Nodal status, Tumor size, BMI, Menopausal status, Energy intake |
|  |                                                                      |              |  |  | All-cause mortality (n=326) | Q5 vs. Q1 (from diet only)  | 0.73 (0.53-1.02)<br>P trend=0.05 |                                                                                                                                                       |

Abbreviations: CWLS, Collaborative Women's Longevity Study; NHS, Nurses' Health Study; WHEL; Women's Healthy Eating and Living

**Supplementary Table S24. Descriptive table of the included observational studies of post-diagnosis serum 25(OH)D and breast cancer prognosis**

| Author, year, study name, country, WCRF Code | Study description                                                                                      | Time of diagnosis and follow-up                    | Disease characteristics treatment                                                                                          | Exposure assessment                                                                                            | Outcome (Events)            | Contrast             | RR (95% CI)                       | Covariates                                                                           |
|----------------------------------------------|--------------------------------------------------------------------------------------------------------|----------------------------------------------------|----------------------------------------------------------------------------------------------------------------------------|----------------------------------------------------------------------------------------------------------------|-----------------------------|----------------------|-----------------------------------|--------------------------------------------------------------------------------------|
| Tokunaga <sup>97</sup><br>2022,<br>Japan     | Retrospective cohort of cancer survivors (n=250), mean age: 59 years, post-menopausal 46%, race: Asian | Diagnosis: 2009-2019                               | Stage I 2.4%, II 64.8%, III 32.8%, ER+ 69.9%, PR+ 48.0%, HER2+ 39.2%, neoadjuvant chemotherapy and definitive surgery 100% | Measured from serum by enzyme-linked immunosorbent assay, before neoadjuvant therapy                           | Recurrence                  | ≥19 vs <29 ng/ml     | 2.28 (1.12-5.03)<br>P trend=0.023 | Pathological complete response, tumor stage                                          |
| Kanstrup <sup>98</sup><br>2020,<br>Denmark   | Prospective cohort of cancer survivors (n=2981), mean age: 62 years, post-menopausal 74.9%             | Diagnosis: 2008-2013, follow-up: median 4.69 years | Invasive cancer, grade I 21%, II 46.7%, III 26.1%, HER2- 86%, HER2+ 13.7%                                                  | Measured from serum by isotope dilution liquid chromatograph-tandem mass spectrometry, before adjuvant therapy | Overall survival (n=427)    | <52 vs <76-99 nmol/l | 1.31 (0.98-1.74)<br>P trend=0.01  | Age, BMI, er status, her2 status, other factors, tumor grade, tumor size, tumor type |
|                                              |                                                                                                        |                                                    |                                                                                                                            |                                                                                                                |                             | ≥99 vs <52 nmol/L    | 0.88 (0.67-1.15)                  |                                                                                      |
|                                              |                                                                                                        |                                                    |                                                                                                                            |                                                                                                                | Event free survival (n=447) | <52 vs 76-99 nmol/l  | 1.63 (1.21-2.19)<br>P trend=<0.01 |                                                                                      |
|                                              |                                                                                                        |                                                    |                                                                                                                            |                                                                                                                |                             | ≥99 vs <52 nmol/L    | 0.84 (0.63-1.12)                  |                                                                                      |



| Author, year, study name, country, WCRF Code          | Study description                                                                 | Time of diagnosis and follow-up                                | Disease characteristics treatment                 | Exposure assessment                                                              | Outcome (Events)                | Contrast              | RR (95% CI)                       | Covariates                                                                                                                                                                                      |
|-------------------------------------------------------|-----------------------------------------------------------------------------------|----------------------------------------------------------------|---------------------------------------------------|----------------------------------------------------------------------------------|---------------------------------|-----------------------|-----------------------------------|-------------------------------------------------------------------------------------------------------------------------------------------------------------------------------------------------|
| Lim <sup>99</sup> 2020, South Korea                   | Retrospective cohort of cancer survivors (n=455), mean age: 52 years, race: Asian | Diagnosis: 2004-2012, follow-up: median 103 months, until 2019 | Stage I-III, HR+ 100%, adjuvant endocrine therapy | Measured from serum, after adjuvant therapy                                      | Recurrence-free survival (n=48) | <=19.99 vs 20 ng/ml   | 2.28 (1.16-4.52)<br>P trend=0.018 | Age, histological grade, human epidermal growth factor receptor 2, ki-67 expression, lymphatic invasion, number of axillary invaded nodes, p53 mutation, surgery, tumor size, vascular invasion |
|                                                       |                                                                                   |                                                                |                                                   |                                                                                  |                                 | ≥49.9 vs <49.9 nmol/L | 0.44 (0.22-0.87)                  |                                                                                                                                                                                                 |
| Huang <sup>100</sup> 2019, China                      | Prospective cohort of cancer survivors (n=206), mean age: 46 years, race: Asian   | Diagnosis: 2009-2012, follow-up: maximum 5 years, until 2017   |                                                   | Measured from fasting serum by enzyme-linked immunosorbent assay, before surgery | All-cause mortality             | <21.3 vs ≥21.3 ng/ml  | 1.65 (1.05-2.70)<br>P trend=0.034 | Lymph node metastasis, molecular phenotype, other factors, radiotherapy                                                                                                                         |
|                                                       |                                                                                   |                                                                |                                                   |                                                                                  |                                 | ≥52.5 vs 52.5 nmol/L  | 0.61 (0.37-0.96)                  |                                                                                                                                                                                                 |
| Robsahm <sup>101</sup> 2019, the Janus cohort, Norway | Population based-cohort study (n=270), mean age: 55 years                         | Diagnosis 1970s-2012                                           |                                                   | Measured from serum by competitive radioimmunoassay (DiaSorin, Stillwater, MN)   | All-cause mortality (n=68)      | 51-67 vs ≤50 nmol/L   | 0.40 (0.19-0.81)                  | Age, season, serum storage time                                                                                                                                                                 |
|                                                       |                                                                                   |                                                                |                                                   |                                                                                  |                                 | 51-67 vs ≤50 nmol/L   | 0.44 (0.22-0.87)                  |                                                                                                                                                                                                 |

| Author, year, study name, country, WCRF Code         | Study description                                                                   | Time of diagnosis and follow-up | Disease characteristics treatment                                                               | Exposure assessment                                                                              | Outcome (Events)                                       | Contrast            | RR (95% CI)                       | Covariates                                          |
|------------------------------------------------------|-------------------------------------------------------------------------------------|---------------------------------|-------------------------------------------------------------------------------------------------|--------------------------------------------------------------------------------------------------|--------------------------------------------------------|---------------------|-----------------------------------|-----------------------------------------------------|
| (Superseded by Tretli <sup>102</sup> )               |                                                                                     |                                 |                                                                                                 |                                                                                                  |                                                        | 68-86 vs ≤50 nmol/L | 0.32 (0.15-0.67)                  |                                                     |
| Thanasitthi chai <sup>103</sup><br>2019,<br>Thailand | Retrospective cohort of cancer survivors (n=303), mean age: 50.8 years, race: Asian | Diagnosis: 2011-2012            | Stage I-II 69.5%, III-IV 30.5%, ER+ 64.9%, ER- 35.1%, HER2+ 19.2%, HER2- 60.4%, equivocal 20.4% | Measured from serum by high-performance liquid chromatography, before and after adjuvant therapy | Overall survival, stratified by age                    | ≥16 vs <16 ng/ml    | 2.47 (1.08-5.64)<br>P trend=0.031 | Er status, her2 status, lymph node involvement      |
|                                                      |                                                                                     |                                 |                                                                                                 |                                                                                                  | Overall survival, stratified by BMI                    |                     | 2.70 (1.16-6.27)<br>P trend=0.021 |                                                     |
|                                                      |                                                                                     |                                 |                                                                                                 |                                                                                                  | Overall survival, stratified by stage                  |                     | 2.43 (1.15-5.14)<br>P trend=0.02  |                                                     |
|                                                      |                                                                                     |                                 |                                                                                                 |                                                                                                  | Overall survival, stratified by HER2 status            |                     | 2.50 (1.10-5.70)<br>P trend=0.03  |                                                     |
|                                                      |                                                                                     |                                 |                                                                                                 |                                                                                                  | Overall survival, stratified by lymph node involvement |                     | 2.49 (1.09-5.70)<br>P trend=0.03  | Age, er status, her2 status                         |
|                                                      |                                                                                     |                                 |                                                                                                 |                                                                                                  | Overall survival, stratified by PR status              |                     | 2.56 (1.11-5.88)<br>P trend=0.027 | Age, er status, her2 status, lymph node involvement |

| Author, year, study name, country, WCRF Code | Study description                                                                     | Time of diagnosis and follow-up                   | Disease characteristics treatment                                                                                            | Exposure assessment                                                                             | Outcome (Events)                                                                    | Contrast              | RR (95% CI)                                                                                              | Covariates                                                               |
|----------------------------------------------|---------------------------------------------------------------------------------------|---------------------------------------------------|------------------------------------------------------------------------------------------------------------------------------|-------------------------------------------------------------------------------------------------|-------------------------------------------------------------------------------------|-----------------------|----------------------------------------------------------------------------------------------------------|--------------------------------------------------------------------------|
|                                              |                                                                                       |                                                   |                                                                                                                              |                                                                                                 | Overall survival, stratified by P53 status                                          |                       | 2.52 (1.10-5.77)<br>P trend=0.029                                                                        |                                                                          |
|                                              |                                                                                       |                                                   |                                                                                                                              |                                                                                                 | Overall survival, stratified by ER status                                           |                       | 2.97 (1.40-6.29)<br>P trend=0.005                                                                        | Age, her2 status, lymph node involvement                                 |
|                                              |                                                                                       |                                                   |                                                                                                                              |                                                                                                 | Overall survival, stratified by Ki-67 status                                        |                       | 2.46 (1.05-5.77)<br>P trend=0.038                                                                        | Lymph node involvement, p53                                              |
| Bouvard <sup>104</sup><br>2018,<br>France    | Prospective cohort of cancer survivors (n=450), mean age: 60.7 years, post-menopausal | Diagnosis: 2004-2006, follow-up: median 5.2 years | Stage I 23.1%, II 50.2%, III 22.0%, unknown 4.7%, PR+ 81.8%, PR- 16.9%, unknown 1.3%, chemotherapy 55.8%, radiotherapy 93.1% | Measured from fasting serum by chemiluminescence protein-binding assay, before adjuvant therapy | All-cause mortality (n=67)<br>Cancer specific mortality (n=41)<br>Recurrence (n=65) | ≥25 vs <25 nmol/l     | 1.85 (1.01-3.38)<br>P trend=0.34<br>2.01 (0.90-4.51)<br>P trend=0.34<br>1.37 (0.69-2.73)<br>P trend=0.34 | Age, bisphosphonate, nodal involvement, pr status, tumor size, vitamin d |
| Mizrak <sup>105</sup><br>2018,<br>Turkey     | Prospective cohort of cancer survivors                                                | Diagnosis: 2007-2013, follow-up:                  | T stage T1 33.5%, T2 57.8%, T3 8.7%,                                                                                         | Measured from serum, after                                                                      | All-cause mortality (n=30)                                                          | Deficiency (<10ng/ml) | P log rank test=0.32                                                                                     | HER2 status, hormone receptor status,                                    |

| Author, year, study name, country, WCRF Code | Study description                                                                                             | Time of diagnosis and follow-up                   | Disease characteristics treatment                                     | Exposure assessment                                                           | Outcome (Events)      | Contrast                                                                                                                                       | RR (95% CI)                         | Covariates                             |
|----------------------------------------------|---------------------------------------------------------------------------------------------------------------|---------------------------------------------------|-----------------------------------------------------------------------|-------------------------------------------------------------------------------|-----------------------|------------------------------------------------------------------------------------------------------------------------------------------------|-------------------------------------|----------------------------------------|
|                                              | (n=186), age range: 22-89 years, pre- and post-menopausal                                                     | median 64 months                                  | N stage N0 45%, N1 31.3%, N2 13.4%, N3 10.3%, HER2+ 22%, surgery 100% | surgery and before adjuvant therapy                                           | Recurrence (n= 35)    | Insufficiency (10 to 25 ng/ml)<br><br>Sufficiency (>25ng/ml)                                                                                   | P log rank test=0.38                | nodal status, tumor grade, tumor stage |
| Kim 2018 <sup>106</sup> , South Korea        | Retrospective cohort of cancer survivors (n=374), mean age: 48.7 years, pre- and post-menopausal, race: Asian | Diagnosis: 2010-2013, follow-up: mean 53.2 months | Stage I-IV, surgery 100%                                              | Measured from serum by radioimmunoassay, before and after neoadjuvant therapy | All-cause mortality   | Both deficient at baseline and after neoadjuvant therapy, <20ng/ml<br><br>Either sufficient at baseline or after neoadjuvant therapy, ≥20ng/ml | P log rank test=0.95                |                                        |
|                                              |                                                                                                               |                                                   |                                                                       |                                                                               | Disease-free survival |                                                                                                                                                | P log rank test=0.58                |                                        |
| Viala <sup>107</sup> , France and USA        | Retrospective cohort of cancer survivors                                                                      | Diagnosis: 2005-2015, follow-up:                  | Stage I-II 63%, III 27%, HER-/HER2+ 14.7%, HR+/HER2+                  | Measured from serum by electrogenerated chemiluminescence                     | Overall survival      | ≥20 vs <20 ng/ml                                                                                                                               | 1.03 (0.60-1.80)<br><br>P trend=0.9 | Age, other factors, sbr grade of the   |

| Author, year, study name, country, WCRF Code     | Study description                                                                         | Time of diagnosis and follow-up                             | Disease characteristics treatment                                                                 | Exposure assessment                                                                 | Outcome (Events)                                                                                                                                                                                                                                                          | Contrast              | RR (95% CI)                                                                                                                                                                                                         | Covariates                                                                                                       |
|--------------------------------------------------|-------------------------------------------------------------------------------------------|-------------------------------------------------------------|---------------------------------------------------------------------------------------------------|-------------------------------------------------------------------------------------|---------------------------------------------------------------------------------------------------------------------------------------------------------------------------------------------------------------------------------------------------------------------------|-----------------------|---------------------------------------------------------------------------------------------------------------------------------------------------------------------------------------------------------------------|------------------------------------------------------------------------------------------------------------------|
|                                                  | (n=327), mean age: 50 years                                                               | median 5.3 years                                            | 13.8%, HER+/HER2- 43.9%, TNBC 27.6%, neoadjuvant chemotherapy 100%                                | immunoassay and multiplex flow immunoassay, before adjuvant therapy                 | Progression-free survival                                                                                                                                                                                                                                                 |                       | 1.00 (0.60-1.50)<br>P trend=0.8                                                                                                                                                                                     | tumor, stage, tumor subtype                                                                                      |
| Yao <sup>108</sup> 2017, the Pathways study, USA | Case-cohort study (n=1666), pre- and post-menopausal, race: White, Black, Asian, Hispanic | Diagnosis: 2006-2013, follow-up: median 7 years, until 2014 | Stage I 49.5%, II 36.4%, III 12.1%, IV 2.0%, ER+ 73.6%, HER2-enriched 6.8%, triple-negative 19.4% | Measured from serum by immunochemiluminometric assay, median 69 days post-diagnosis | All-cause mortality (n=250)<br>All-cause mortality, pre-menopausal (n=59)<br>All-cause mortality, post-menopausal (n=191)<br>Breast cancer-specific mortality (n=133)<br>Breast cancer, pre-menopausal (n=42)<br>Breast cancer specific mortality, post-menopausal (n=91) | ≥62.7 vs <41.8 nmol/l | 0.72 (0.54-0.98)<br>P trend=0.03<br>0.45 (0.21-0.96)<br>P trend=0.04<br>0.79 (0.56-1.2)<br>P trend=0.19<br>0.85 (0.55-1.33)<br>P trend=0.53<br>0.37 (0.15-0.93)<br>P trend=0.03<br>1.27 (0.74-2.17)<br>P trend=0.39 | Age at diagnosis, race/ethnicity, BMI, season blood drawn, tumour stage, tumour grade, tumour subtype, treatment |

| Author, year, study name, country, WCRF Code | Study description | Time of diagnosis and follow-up | Disease characteristics treatment | Exposure assessment | Outcome (Events)                                        | Contrast | RR (95% CI)                      | Covariates |
|----------------------------------------------|-------------------|---------------------------------|-----------------------------------|---------------------|---------------------------------------------------------|----------|----------------------------------|------------|
|                                              |                   |                                 |                                   |                     | Recurrence-free (n=200)                                 |          | 1.13 (0.82-1.58)<br>P trend=0.47 |            |
|                                              |                   |                                 |                                   |                     | Recurrence free survival, post-menopausal (n=130)       |          | 1.48 (0.97-2.27)<br>P trend=0.05 |            |
|                                              |                   |                                 |                                   |                     | Invasive disease-free survival (n=372)                  |          | 0.85 (0.6-1.2)<br>P trend=0.36   |            |
|                                              |                   |                                 |                                   |                     | Invasive disease-free survival, pre-menopausal (n=100)  |          | 0.58 (0.34-1.01)<br>P trend=0.04 |            |
|                                              |                   |                                 |                                   |                     | Invasive disease-free survival, post-menopausal (n=271) |          | 0.98 (0.73-1.3)<br>P trend=0.89  |            |
|                                              |                   |                                 |                                   |                     | Second primary cancers (n=96)                           |          | 0.84 (0.51-1.39)<br>P trend=0.49 |            |
|                                              |                   |                                 |                                   |                     | Second primary cancers, pre-menopausal (n=18)           |          | 1.53 (0.46-5.05)<br>P trend=0.82 |            |

| Author, year, study name, country, WCRF Code | Study description                                                                                            | Time of diagnosis and follow-up                     | Disease characteristics treatment                                                                                                             | Exposure assessment                                                                         | Outcome (Events)                                                       | Contrast         | RR (95% CI)                                                     | Covariates                                                                                                                                                     |
|----------------------------------------------|--------------------------------------------------------------------------------------------------------------|-----------------------------------------------------|-----------------------------------------------------------------------------------------------------------------------------------------------|---------------------------------------------------------------------------------------------|------------------------------------------------------------------------|------------------|-----------------------------------------------------------------|----------------------------------------------------------------------------------------------------------------------------------------------------------------|
|                                              |                                                                                                              |                                                     |                                                                                                                                               |                                                                                             | Second primary cancers, post-menopausal (n=78)                         |                  | 0.81 (0.46-1.41)<br>P trend=0.40                                |                                                                                                                                                                |
| Wu <sup>109</sup><br>2017, USA               | Nested case-cohort study (n=243), age range: 28-80 years, pre- and post-menopausal, race: Black and Hispanic |                                                     | Stage I-II 60.1%, III-IV 25.9%, ER+/PR+ 48.6%, ER-/PR- 40.7%, HER2+ 18.9%, HER2- 70.3%                                                        | Measured from serum by liquid chromatography/tandem mass spectrometry, before any treatment | All-cause mortality<br>Disease-free survival                           | <12 vs ≥24 ng/ml | 1.9 (0.7–3.8)<br>P trend=0.26<br>4.4 (0.9-22.7)<br>P trend=0.28 | Age at time of diagnosis, ethnicity, tumour size, node stage, oestrogen receptor, progesterone receptor and HER2 receptor status, BMI and season of blood draw |
| Lim <sup>110</sup><br>2015, South Korea      | Retrospective cohort of cancer survivors (n=469), mean age: 49.6 years, race: Asian                          | Diagnosis: 2000-2008, follow-up: median 85.8 months | Stage I 32.4%, II 50.3%, III 17.3%, PR+ 52%, PR- 48%. HER2+ 12.6%, HER2- 86.8%, chemotherapy 64.2%, radiotherapy 58.2%, hormone therapy 75.3% | Measured from serum by chemiluminescent microparticle immunoassay, after surgery            | Overall survival<br>Cancer specific mortality<br>Disease-free survival | ≥20 vs <20 ng/ml | 0.46 (0.19-1.12)<br>0.46 (0.17-1.30)<br>0.45 (0.25-0.82)        | Age, BMI, chemotherapy, er status, her2 status, lymphatic invasion, pr status, stage                                                                           |

| Author, year, study name, country, WCRF Code          | Study description                                                                                                 | Time of diagnosis and follow-up                                                                     | Disease characteristics treatment                                                                                                                                                         | Exposure assessment                                                                                | Outcome (Events)            | Contrast                | RR (95% CI)      | Covariates                                                                                                                                                                                                 |
|-------------------------------------------------------|-------------------------------------------------------------------------------------------------------------------|-----------------------------------------------------------------------------------------------------|-------------------------------------------------------------------------------------------------------------------------------------------------------------------------------------------|----------------------------------------------------------------------------------------------------|-----------------------------|-------------------------|------------------|------------------------------------------------------------------------------------------------------------------------------------------------------------------------------------------------------------|
| Lohmann <sup>111</sup><br>2015,<br>Canada             | Correlative study nested in a randomized controlled trial (n=934), mean age: 47.8 years, pre- and post-menopausal | Diagnosis: 2000-2005, follow-up: 9.2 years (OS) and 8.0 years (RFS), until 2013 (OS) and 2012 (RFS) | T stage T1 36%, T2-4 64%, ER- 39%, ER+ 61%, partial mastectomy 48%, total mastectomy 52%                                                                                                  | Measured from fasting serum by radioimmunoassay, post-surgery and before chemotherapy              | All-cause mortality         | ≥125 vs <40 nmol/l      | 0.5 (0.14-1.77)  | Treatment, number of positive lymph nodes, type of surgery, oestrogen receptor status, age, race, tumour size, nodal status, menopausal status, HER2 status, ECOG performance                              |
|                                                       |                                                                                                                   |                                                                                                     |                                                                                                                                                                                           |                                                                                                    | Breast cancer mortality     |                         | 0.65 (0.18-2.37) |                                                                                                                                                                                                            |
|                                                       |                                                                                                                   |                                                                                                     |                                                                                                                                                                                           |                                                                                                    | Relapse-free survival       |                         | 0.65 (0.21-2.00) |                                                                                                                                                                                                            |
| Vrieling <sup>112</sup><br>2014,<br>MARIE,<br>Germany | Prospective cohort of cancer survivors (n=2177), age range: 50-74 years, post-menopausal                          | Follow-up: 5.3 years                                                                                | Stage I-IIA 86.9%, IIIB-IV 7.9%, ER+ 78.3%, ER- 19.6%, PR+ 66.1%, PR- 31.8%, ER+/PR+ 60.6%, ER-/PR- 15.0%, HER2+ 18.5%, HER2- 70.0%, chemotherapy 45%, radiotherapy 79.9%, tamoxifen/arom | Measured from serum by enzyme immunoassay, majority before therapy, median 116 days post diagnosis | All-cause mortality (n=274) | <35 vs ≥55 nmol/l       | 0.8 (0.57-1.14)  | Age at diagnosis, study centre, season, tumour size, nodal status, metastasis, tumour grade, ER/PR status, diabetes, cardiovascular disease, mode of detection, smoking, hormone replacement therapy (HRT) |
|                                                       |                                                                                                                   |                                                                                                     |                                                                                                                                                                                           |                                                                                                    |                             |                         | ≥55 vs 35 nmol/l |                                                                                                                                                                                                            |
|                                                       |                                                                                                                   |                                                                                                     |                                                                                                                                                                                           |                                                                                                    | All-cause mortality (n=274) | Per 10 nmol/l decrement | 1.07 (1.00-1.13) |                                                                                                                                                                                                            |
|                                                       |                                                                                                                   |                                                                                                     |                                                                                                                                                                                           |                                                                                                    |                             | Per 10 nmol/l increment | 0.93 (0.88-1.00) |                                                                                                                                                                                                            |
|                                                       |                                                                                                                   |                                                                                                     | Breast cancer-specific mortality (n=197)                                                                                                                                                  | <35 vs ≥55 nmol/l                                                                                  | 0.75 (0.5-1.15)             |                         |                  |                                                                                                                                                                                                            |



| Author, year, study name, country, WCRF Code | Study description | Time of diagnosis and follow-up | Disease characteristics treatment | Exposure assessment | Outcome (Events)                    | Contrast                | RR (95% CI)      | Covariates       |
|----------------------------------------------|-------------------|---------------------------------|-----------------------------------|---------------------|-------------------------------------|-------------------------|------------------|------------------|
|                                              |                   |                                 | atase inhibitor<br>80.6%          |                     |                                     | ≥55 vs 35 nmol/l        | 0.79 (0.54-1.16) | use at diagnosis |
|                                              |                   |                                 |                                   |                     | Breast cancer-related death (n=197) | Per 10 nmol/l decrement | 1.04 (0.97-1.12) |                  |
|                                              |                   |                                 |                                   |                     |                                     | Per 10 nmol/l increment | 0.96 (0.89-1.03) |                  |
|                                              |                   |                                 |                                   |                     | Recurrence (n=201)                  | <35 vs ≥55 nmol/l       | 1.35 (0.92-1.97) |                  |
|                                              |                   |                                 |                                   |                     |                                     | ≥55 vs 35 nmol/l        | 0.70 (0.48-1.03) |                  |
|                                              |                   |                                 |                                   |                     | Recurrence (n=201)                  | Per 10 nmol/l decrement | 1.07 (0.99-1.14) |                  |
|                                              |                   |                                 |                                   |                     | Distant disease free (n=235)        | <35 vs ≥55 nmol/l       | 1.17 (0.81-1.68) |                  |
|                                              |                   |                                 |                                   |                     |                                     | ≥55 vs 35 nmol/l        | 0.59 (0.40-0.81) |                  |

| Author, year, study name, country, WCRF Code             | Study description                                                                              | Time of diagnosis and follow-up    | Disease characteristics treatment                                                                                                                                                               | Exposure assessment                                                                                | Outcome (Events)                        | Contrast                         | RR (95% CI)                         | Covariates                                                                                                    |
|----------------------------------------------------------|------------------------------------------------------------------------------------------------|------------------------------------|-------------------------------------------------------------------------------------------------------------------------------------------------------------------------------------------------|----------------------------------------------------------------------------------------------------|-----------------------------------------|----------------------------------|-------------------------------------|---------------------------------------------------------------------------------------------------------------|
|                                                          |                                                                                                |                                    |                                                                                                                                                                                                 |                                                                                                    | Distant disease free (n=235)            | Per 10 nmol/l decrement          | 1.12 (1.04-1.19)                    |                                                                                                               |
|                                                          |                                                                                                |                                    |                                                                                                                                                                                                 |                                                                                                    | Non-breast cancer related death (n=77)  | <34.9 vs ≥55 nmol/L              | 0.9 (0.46-1.74)                     |                                                                                                               |
|                                                          |                                                                                                |                                    |                                                                                                                                                                                                 |                                                                                                    | Non-breast cancer related death (n=77)  | Per 10 nmol/l decrement          | 1.15 (1.02-1.28)                    |                                                                                                               |
| Villaseñor <sup>11</sup><br><sup>3</sup> 2013, HEAL, USA | Prospective cohort of cancer survivors (n=585), mean age: 55.8 years, pre- and post-menopausal | Median follow-up: median 9.2 years | ER+ and/or PR+ 71.5%, ER-/PR- 19.3%, unknown 9.2%, surgery only 23.4%, surgery and radiation 36.9%, surgery and chemotherapy 12.5%, surgery, chemotherapy, and radiation 27.2%, tamoxifen 52.1% | Measured from fasting serum by radioimmunosorbent assay, after treatment, 36 months post diagnosis | All-cause mortality (n=110)             | >30 vs <20 ng/ml<br>Per 10 ng/ml | 0.9 (0.5-1.61)<br>0.85 (0.68-1.09)  | Age at diagnosis, tumour stage, BMI, race/ethnicity, study site, tamoxifen use, season blood drawn, treatment |
|                                                          |                                                                                                |                                    |                                                                                                                                                                                                 |                                                                                                    | Breast cancer-specific mortality (n=48) | >30 vs <20 ng/ml<br>Per 10 ng/ml | 1.21 (0.52-2.8)<br>1.08 (0.75-1.54) | Age at diagnosis, tumour stage, BMI, race/ethnicity, study site, tamoxifen use, season blood drawn,           |

| Author, year, study name, country, WCRF Code            | Study description                                                          | Time of diagnosis and follow-up                   | Disease characteristics treatment                        | Exposure assessment                                                                     | Outcome (Events)                        | Contrast          | RR (95% CI)                        | Covariates                                    |
|---------------------------------------------------------|----------------------------------------------------------------------------|---------------------------------------------------|----------------------------------------------------------|-----------------------------------------------------------------------------------------|-----------------------------------------|-------------------|------------------------------------|-----------------------------------------------|
|                                                         |                                                                            |                                                   |                                                          |                                                                                         |                                         |                   |                                    | treatment, physical activity, smoking status  |
| Tretli <sup>102</sup><br>2012, the Janus cohort, Norway | Population based-cohort study (n=251), age range: 36-75 years, race: White | Diagnosis: 1984-2004, follow-up: until 2008       | Local 26.7%, regional 29.5%, distant 9.6%, unknown 34.3% | Measured from serum by competitive radioimmunoassay, within 90 days of cancer diagnosis | All-cause mortality (n=98)              | ≥81 vs <46 nmol/l | 0.37 (0.21-0.67)<br>P trend<0.01   | Sex, age at diagnosis, season blood drawn     |
|                                                         |                                                                            |                                                   |                                                          |                                                                                         | Breast cancer-specific mortality (n=82) | ≥81 vs <46 nmol/l | 0.42 (0.21-0.82)<br>P trend=0.01   |                                               |
| Hatse <sup>114</sup><br>2012, Belgium                   | Prospective cohort of cancer survivors (n=1800), mean age 57.7 years       | Diagnosis: 2003-2010, follow-up: median 4.7 years | Non-metastatic, invasive                                 | Measured from serum by radioimmunoassay (DiaSorin), before treatment                    | All-cause mortality (n=134)             | Per 10 ng/ml      | 0.79 (0.65–0.95)<br>P trend=0.0104 | Age, BMI, lymph nodes, tumour size, ER, grade |
|                                                         |                                                                            |                                                   |                                                          |                                                                                         |                                         | ≥30 vs <30 ng/ml  | 0.53 (0.33–0.86)<br>P trend=0.01   |                                               |
|                                                         |                                                                            |                                                   |                                                          |                                                                                         | Breast cancer specific mortality (n=64) | Per 10 ng/ml      | 0.79 (0.62-1.00)<br>P trend=0.05   | Age, BMI, tumour size, pN, grade, and ER      |
|                                                         |                                                                            |                                                   |                                                          |                                                                                         |                                         | ≥30 vs <30 ng/ml  | 0.49 (0.27–0.89)<br>P trend=0.02   |                                               |
|                                                         |                                                                            |                                                   |                                                          |                                                                                         | Post-menopausal                         | ≥30 vs <30 ng/ml  | 0.15 (0.03–0.63)<br>P trend=0.01   |                                               |
|                                                         |                                                                            |                                                   |                                                          |                                                                                         | Pre-menopausal                          | ≥30 vs <30 ng/ml  | 0.93 (0.43–2.02)<br>P trend=0.85   |                                               |

| Author, year, study name, country, WCRF Code           | Study description                                                                           | Time of diagnosis and follow-up                        | Disease characteristics treatment                                                 | Exposure assessment                                                       | Outcome (Events)              | Contrast                            | RR (95% CI)                       | Covariates                                                                                                                                      |
|--------------------------------------------------------|---------------------------------------------------------------------------------------------|--------------------------------------------------------|-----------------------------------------------------------------------------------|---------------------------------------------------------------------------|-------------------------------|-------------------------------------|-----------------------------------|-------------------------------------------------------------------------------------------------------------------------------------------------|
| Kim <sup>115</sup><br>2011,<br>South<br>Korea          | Retrospective cohort of cancer survivors (n=310), mean age: 48.7 years, race: Asian         | Diagnosis: 2006, follow-up: median 23 months           | T stage T0-T3                                                                     | Measured from serum by radioimmunoassay, before surgery                   | Disease-free survival         | <20 vs 30-150 ng/ml                 | 3.97 (1.77-8.91)<br>P trend=0.001 | Age, er status, lymph node status, tumor size                                                                                                   |
|                                                        |                                                                                             |                                                        |                                                                                   |                                                                           |                               | 74.9-374.4 vs <49.9 nmol/L          | 0.25 (0.11-0.56)                  |                                                                                                                                                 |
| Pritchard <sup>116</sup><br>2011,<br>Canada<br>and USA | Randomized control trial (n=667), mean age: 60.1 years, post-menopausal, race: mostly White | Follow-up: median 7.9 years                            | T stage T1 58%, T2 38%, T3A 2%, T4 1%, mastectomy 100%, adjuvant chemotherapy 34% | Measured from serum, before therapy                                       | Event free survival (n=220)   | Continuous baseline 25-OH vitamin D | P = 0.43                          |                                                                                                                                                 |
| Vrieling <sup>117</sup><br>2011,<br>Germany            | Prospective cohort of cancer survivors (n=1295), mean age 63.4 years, postmenopausal        | Diagnosis: 2002-2005, follow-up: 5.8 years, until 2009 | Stage I-IV, invasive, in situ, ER+ 76.6%, ER- 23.4%                               | Measured from serum by OCTEIA enzyme immunoassay, 83 days after diagnosis | All-cause mortality (n=174)   | <34.9 vs ≥55 nmol/l                 | 1.55 (1.00-2.39)                  | Age at diagnosis, season blood drawn, tumour size, nodal status, metastasis, tumour grade, hormone receptor status, diabetes, mode of detection |
|                                                        |                                                                                             |                                                        |                                                                                   |                                                                           | (superseded by Vrieling 2014) |                                     |                                   |                                                                                                                                                 |
|                                                        |                                                                                             |                                                        |                                                                                   |                                                                           | (superseded by Vrieling 2014) |                                     |                                   |                                                                                                                                                 |

| Author, year, study name, country, WCRF Code | Study description                                                                                       | Time of diagnosis and follow-up                 | Disease characteristics treatment                                                                                     | Exposure assessment                                                          | Outcome (Events)             | Contrast              | RR (95% CI)                      | Covariates                                                       |
|----------------------------------------------|---------------------------------------------------------------------------------------------------------|-------------------------------------------------|-----------------------------------------------------------------------------------------------------------------------|------------------------------------------------------------------------------|------------------------------|-----------------------|----------------------------------|------------------------------------------------------------------|
|                                              |                                                                                                         |                                                 |                                                                                                                       |                                                                              | Distant disease free (n=135) | <35 vs ≥55 nmol/l     | 2.09 (1.29-3.41)                 |                                                                  |
|                                              |                                                                                                         |                                                 |                                                                                                                       |                                                                              |                              | ≥55 vs 35 nmol/l      | 0.48 (0.29-0.78)                 |                                                                  |
|                                              |                                                                                                         |                                                 |                                                                                                                       |                                                                              | Distant disease free (n=135) | Per 10 mmol/l         | 1.14 (1.05-1.24)                 |                                                                  |
| Jacobs <sup>93</sup> 2011, WHEL, USA         | Matched case-control study (n=1024), mean age: 51.6 years, pre- and post-menopausal, race: mostly White | Diagnosis: 1991-2000, follow-up: mean 7.3 years | Stage I 21.1%, II 48.0%, IIIA 41.7%, ER+ 71.5%, ER- 27.3%, chemotherapy 80.5%, radiation 62.9%, hormone therapy 59.7% | Measured from serum by chemiluminescent immunoassay, 2 years after diagnosis | All-cause mortality (n=250)  | <20 vs ≥20 ng/ml      | 1.13 (0.72-1.79)<br>P value=0.59 | BMI, ethnicity, intervention group, calcium intake, tumour grade |
|                                              |                                                                                                         |                                                 |                                                                                                                       |                                                                              |                              | ≥49.9 vs <49.9 nmol/l | 0.88 (0.56-1.39)                 |                                                                  |
|                                              |                                                                                                         |                                                 |                                                                                                                       |                                                                              | Local recurrence (n=62)      | <20 vs ≥20 ng/ml      | 1.48 (0.47-4.65)<br>P value=0.50 |                                                                  |
|                                              |                                                                                                         |                                                 |                                                                                                                       |                                                                              |                              | ≥49.9 vs <49.9 nmol/l | 0.68 (0.22-2.13)                 |                                                                  |
|                                              |                                                                                                         |                                                 |                                                                                                                       |                                                                              | Regional recurrence (n=19)   | <20 vs ≥20 ng/ml      | 1.13 (0.20-6.44)<br>P value=0.89 |                                                                  |
|                                              |                                                                                                         |                                                 |                                                                                                                       |                                                                              |                              | ≥49.9 vs <49.9 nmol/l | 1.13 (0.20-6.44)                 |                                                                  |

| Author, year, study name, country, WCRF Code | Study description                                                                             | Time of diagnosis and follow-up                  | Disease characteristics treatment                                                                                                | Exposure assessment                                                      | Outcome (Events)                                          | Contrast              | RR (95% CI)                      | Covariates                                                              |
|----------------------------------------------|-----------------------------------------------------------------------------------------------|--------------------------------------------------|----------------------------------------------------------------------------------------------------------------------------------|--------------------------------------------------------------------------|-----------------------------------------------------------|-----------------------|----------------------------------|-------------------------------------------------------------------------|
|                                              |                                                                                               |                                                  |                                                                                                                                  |                                                                          | Distant recurrence (n=346)                                | <20 vs ≥20 ng/ml      | 1.00 (0.68-1.48)<br>P value=0.99 |                                                                         |
|                                              |                                                                                               |                                                  |                                                                                                                                  |                                                                          |                                                           | ≥49.9 vs <49.9 nmol/l | 1.00 (0.68-1.47)                 |                                                                         |
|                                              |                                                                                               |                                                  |                                                                                                                                  |                                                                          | Recurrence, all cases and controls, premenopausal (n=512) | <10 vs ≥30 ng/ml      | 1.14 (0.57-2.31)<br>P trend=0.85 |                                                                         |
|                                              |                                                                                               |                                                  |                                                                                                                                  |                                                                          | Recurrence-free, premenopausal (n=59)                     |                       | 0.17 (0.01-3.07)<br>P trend=0.61 |                                                                         |
|                                              |                                                                                               |                                                  |                                                                                                                                  |                                                                          | Recurrence-free, postmenopausal (n=346)                   |                       | 1.45 (0.62-3.37)<br>P trend=0.49 |                                                                         |
| Goodwin <sup>118</sup> 2009, Canada          | Prospective cohort of cancer survivors (n=512), mean age: 50.4 years, pre- and postmenopausal | Diagnosis: 1989-1996, follow-up: mean 11.6 years | Stage I 56.2%, II 32.0%, III 4.7%, unknown 7.0%, ER+ 77.7%, ER- 22.3%, mastectomy 22.7%, lumpectomy 77.3%, adjuvant chemotherapy | Measured from fasting serum by radioimmunoassay, before adjuvant therapy | All-cause mortality (n=106)                               | <50 vs ≥72 nmol/l     | 1.6 (0.96-2.64)<br>P trend=0.05  | Age, tumour stage, nodal status, oestrogen receptor level, tumour grade |
|                                              |                                                                                               |                                                  |                                                                                                                                  |                                                                          |                                                           | ≥72 vs <50 nmol/l     | 0.63 (0.38-1.04)                 |                                                                         |
|                                              |                                                                                               |                                                  |                                                                                                                                  |                                                                          | Distant disease free (n=116)                              | <50 vs ≥72 nmol/l     | 1.71 (1.02-2.86)<br>P trend=0.09 |                                                                         |

| Author, year, study name, country, WCRF Code | Study description | Time of diagnosis and follow-up | Disease characteristics treatment      | Exposure assessment | Outcome (Events) | Contrast          | RR (95% CI)      | Covariates |
|----------------------------------------------|-------------------|---------------------------------|----------------------------------------|---------------------|------------------|-------------------|------------------|------------|
|                                              |                   |                                 | 38.9% adjuvant tamoxifen therapy 39.1% |                     |                  | ≥72 vs <50 nmol/l | 0.58 (0.35-0.98) |            |

HEAL, Health, Eating, Activity, and Lifestyle Study; MARIE, Mammary carcinoma risk factor Investigation; NCIC CTG, National Cancer Institute of Canada Clinical Trials Group; WHEL; Women's Healthy Eating and Living

## Supplementary Figure S1. Forest plot of prognostic outcomes for the highest compared with the lowest level of fruit and vegetable intake after breast cancer diagnosis

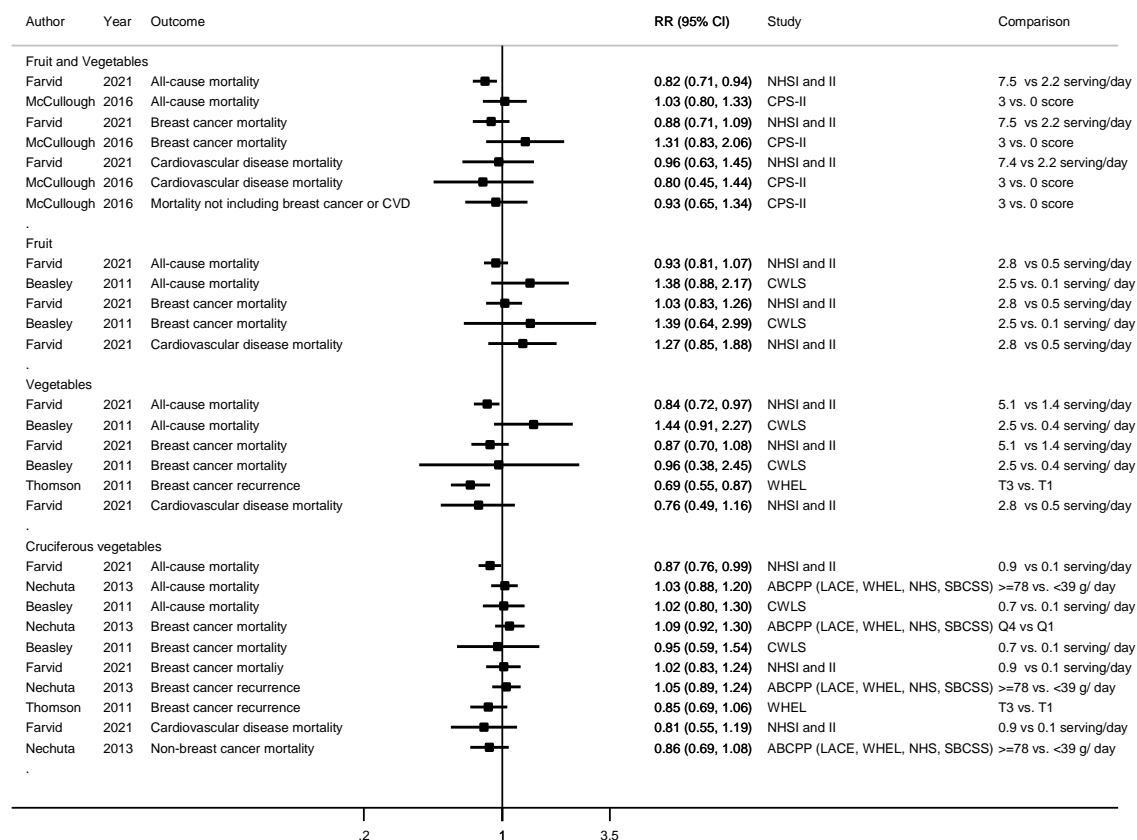

**Note:** Three additional studies were not included. The National Runners' and Walkers' Health Surveys reported result on breast cancer mortality in relation to each increase of a piece of fruit (HR 1.10, 95% CI 0.86-1.35, P value=0.40) (Williams, 2014). The MSKCC study only reported the risk estimates (HR 0.31 for breast cancer specific mortality and 0.46 for breast cancer recurrence on post-menopausal women) without 95%CI confidence interval (Hebert 1998). The WHEL study comparison group did not report the results from the multivariate analysis for all-cause mortality and fruit and vegetable intake (HR 6.94-19.96 vs. 0.33-3.43 servings/day = 0.63; P trend = 0.08 for univariate analysis) (Pierce, 2007(b)).

For cruciferous vegetables, there is some overlapping between Farvid 2021(a) and Nechuta 2013 regarding NHSI. However, Farvid 2021 also includes NHS II that is not used in the ABCPP.

The figure should not be interpreted as a quantitative summary.

Abbreviations: ABPCC, After Breast Cancer Pooling Project; CPS-II, Cancer Prevention Study II Nutrition Cohort; CVD, Cardiovascular Disease; CWLS, Collaborative Women's Longevity Study; NHS, Nurses' Health Study; Q, quantile; RR, Relative Risk



**Supplementary Figure S2. Forest plot of prognostic outcomes for the highest compared with the lowest level of wholegrains intake after breast cancer diagnosis**

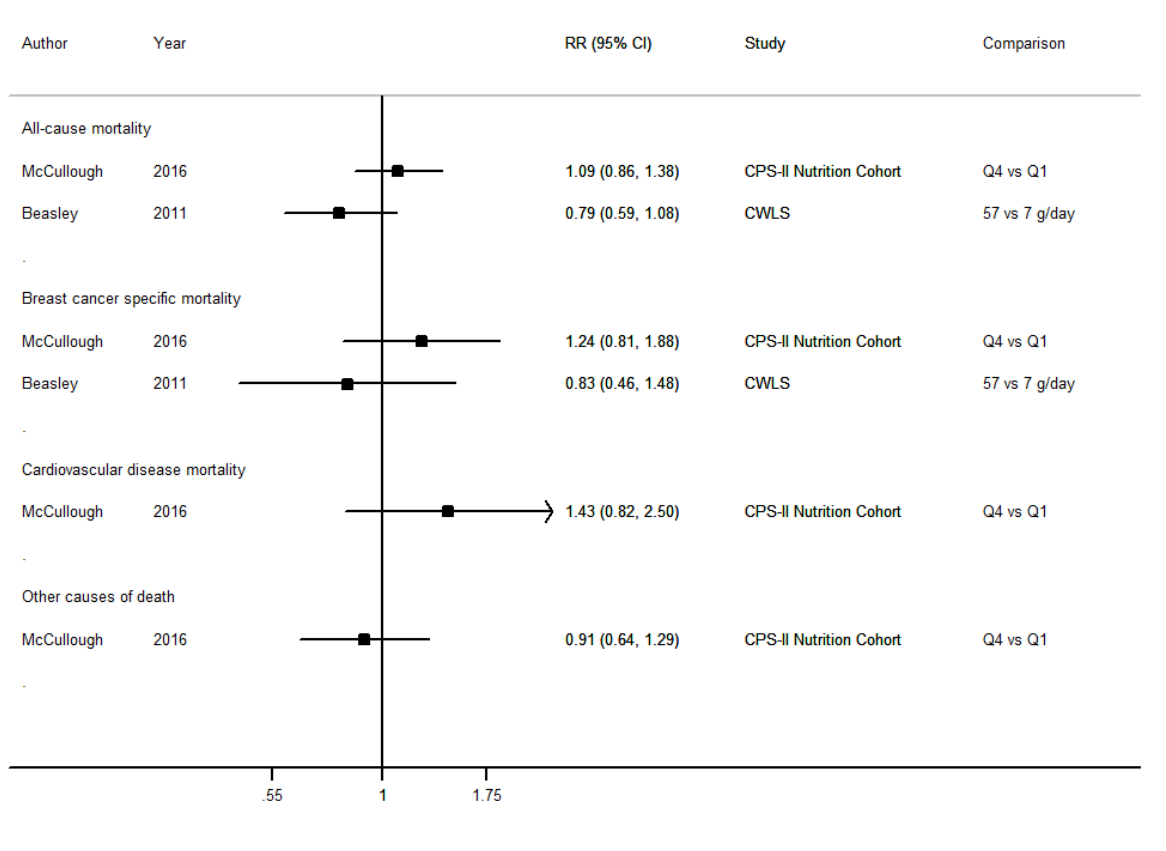

**Note:** One additional study was not included. The Diet Cancer and Health study reported result on all-cause mortality (HR 0.99, 95% CI 0.88-1.12), breast cancer mortality (HR 1.05, 95% CI 0.92-1.21) and recurrence (HR 0.98, 95% CI 0.83-1.13) in relation to each increase 50g/day of wholegrains (Andersen, 2020). The figure should not be interpreted as a quantitative summary.

CPS-II, Cancer Prevention Study II Nutrition Cohort; CWLS, Collaborative Women’s Longevity Study.

### Supplementary Figure S3. Forest plot of prognostic outcomes for the highest compared with the lowest level of meat intake after breast cancer diagnosis

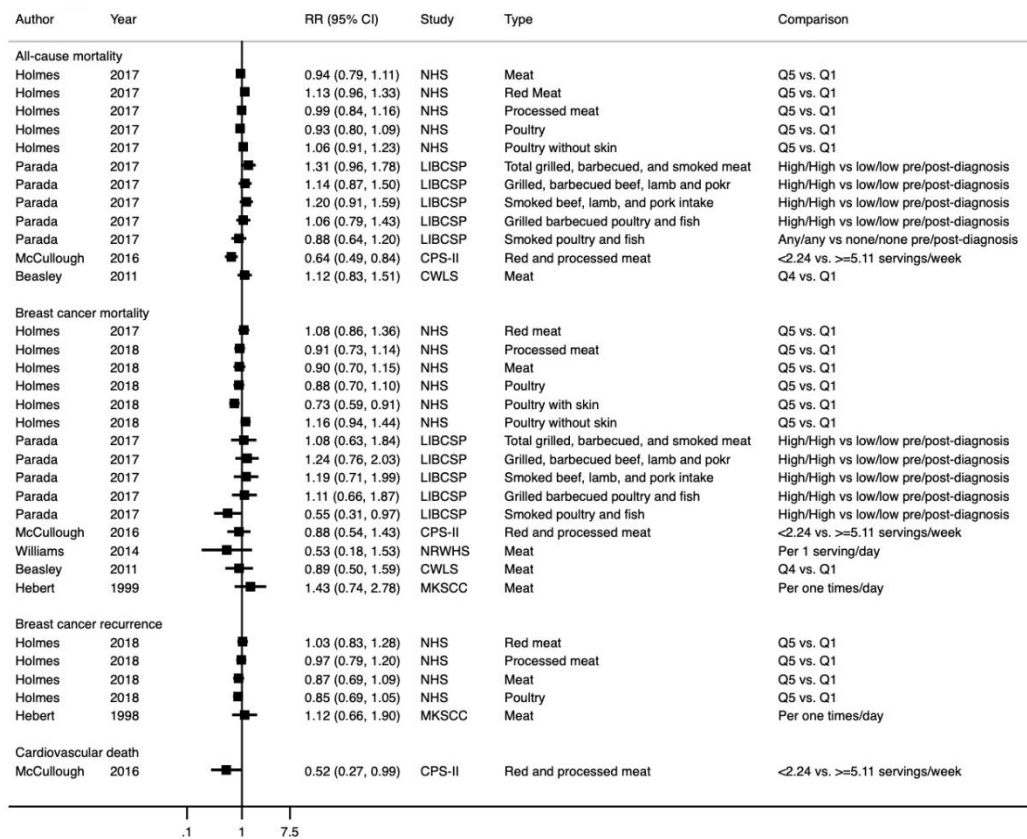

**Note:** The same study may be represented more than once if different types of meat were investigated. The figure should not be interpreted as a quantitative summary.

CPS-II, Cancer Prevention Study II Nutrition Cohort; CWLS, Collaborative Women's Longevity Study; LIBCSP, Long Island Breast Cancer Study Project; MKSCC, Memorial Sloan-Kettering Cancer Centre; NHS, Nurses' Health Study

### Supplementary Figure S4. Forest plot of prognostic outcomes for the highest compared with the lowest level of fish intake after breast cancer diagnosis

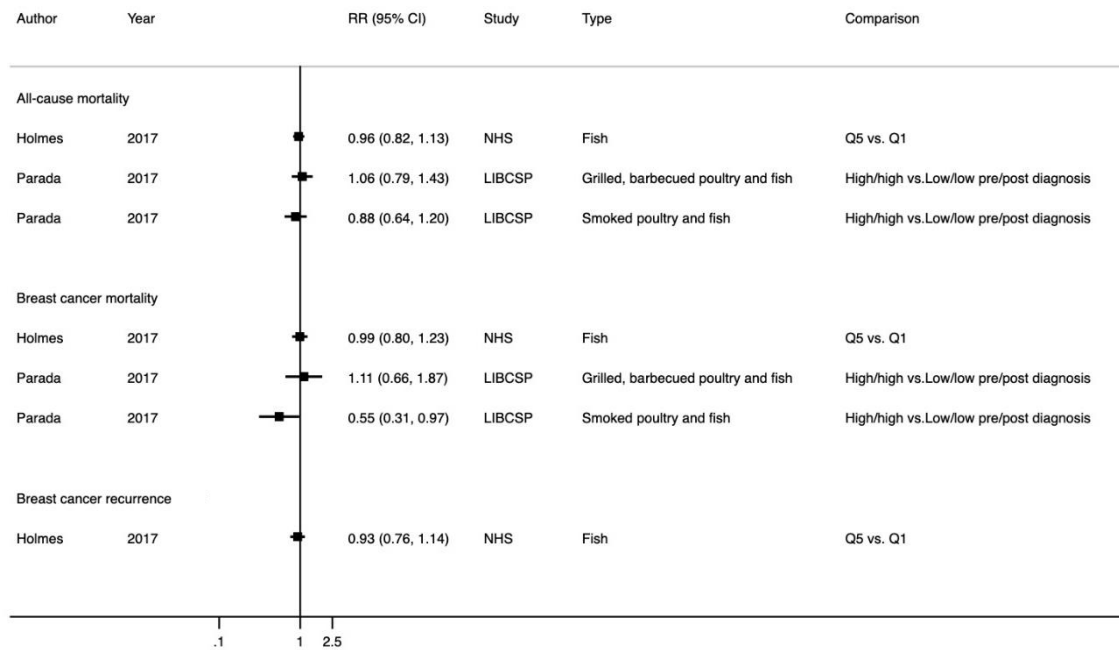

**Note:** The same study may be represented more than once if different types of fish were investigated. The figure should not be interpreted as a quantitative summary.

LIBCSP, Long Island Breast Cancer Study Project; MKSCC, Memorial Sloan-Kettering Cancer Centre; NHS, Nurses' Health Study

**Supplementary Figure S5. Forest plot of all-cause mortality for the highest compared with the lowest level of dairy intake after breast cancer diagnosis**

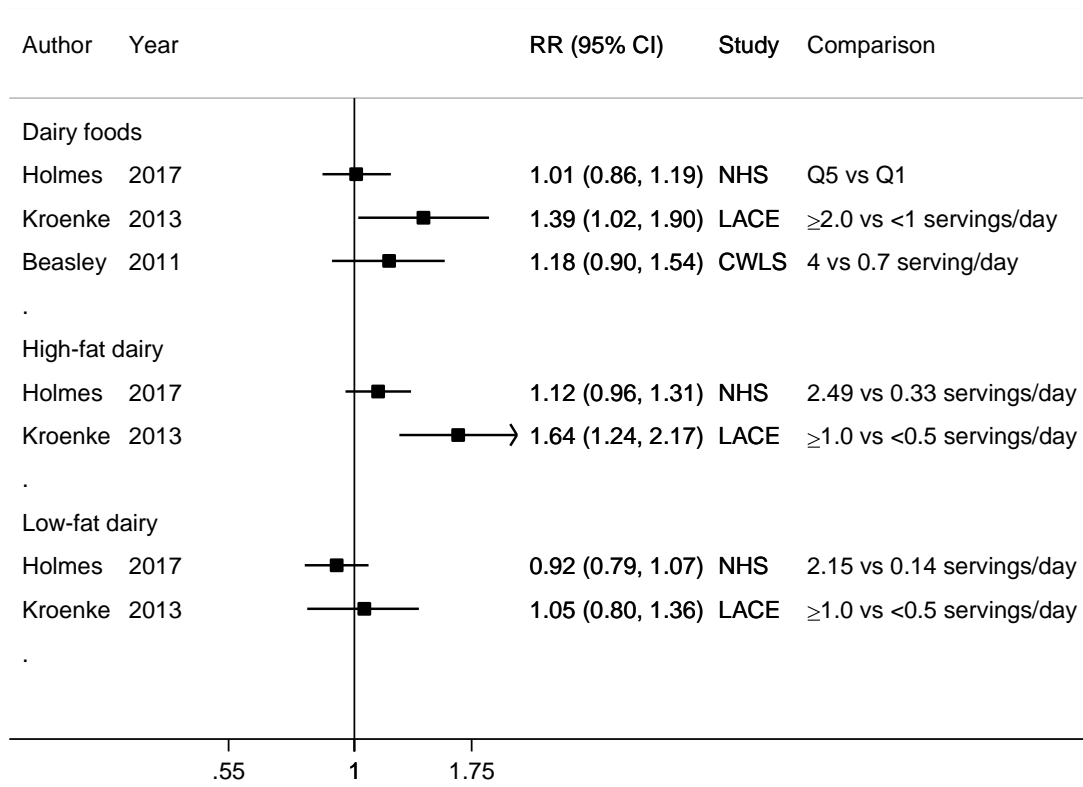

**Note:** The figure should not be interpreted as a quantitative summary.

One publication (Andersen, 2020) was not included in the forest plot because the point estimate was reported in continuous per each 200g/day increase (HR 1.03, 95% CI 0.96-1.08).

CWLS, Collaborative Women’s Longevity Study; LACE, Life After Cancer Epidemiology Study; NHS, Nurses’ Health Study; Q, quantile; RR, Relative Risk

**Supplementary Figure S6. Forest plot of breast cancer mortality for the highest compared with the lowest level of dairy intake after breast cancer diagnosis**

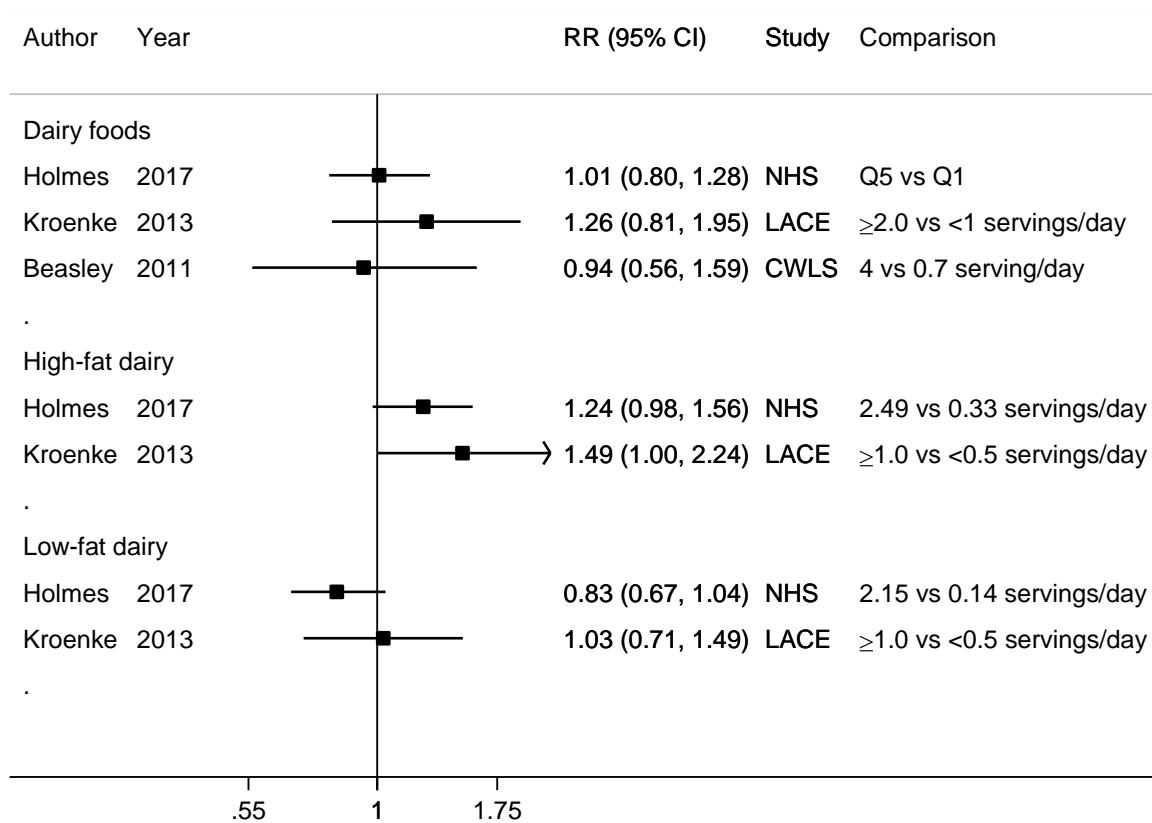

**Note:** The figure should not be interpreted as a quantitative summary.

One publication (Andersen, 2020) was not included in the forest plot because the point estimate was reported in continuous per each 200g/day increase (HR 0.98, 95% CI 0.91-1.06).

CWLS, Collaborative Women's Longevity Study; LACE, Life After Cancer Epidemiology Study; NHS, Nurses' Health Study; Q, quantile; RR, Relative Risk

**Supplementary Figure S7. Forest plot of breast cancer recurrence for the highest compared with the lowest level of dairy intake after breast cancer diagnosis**

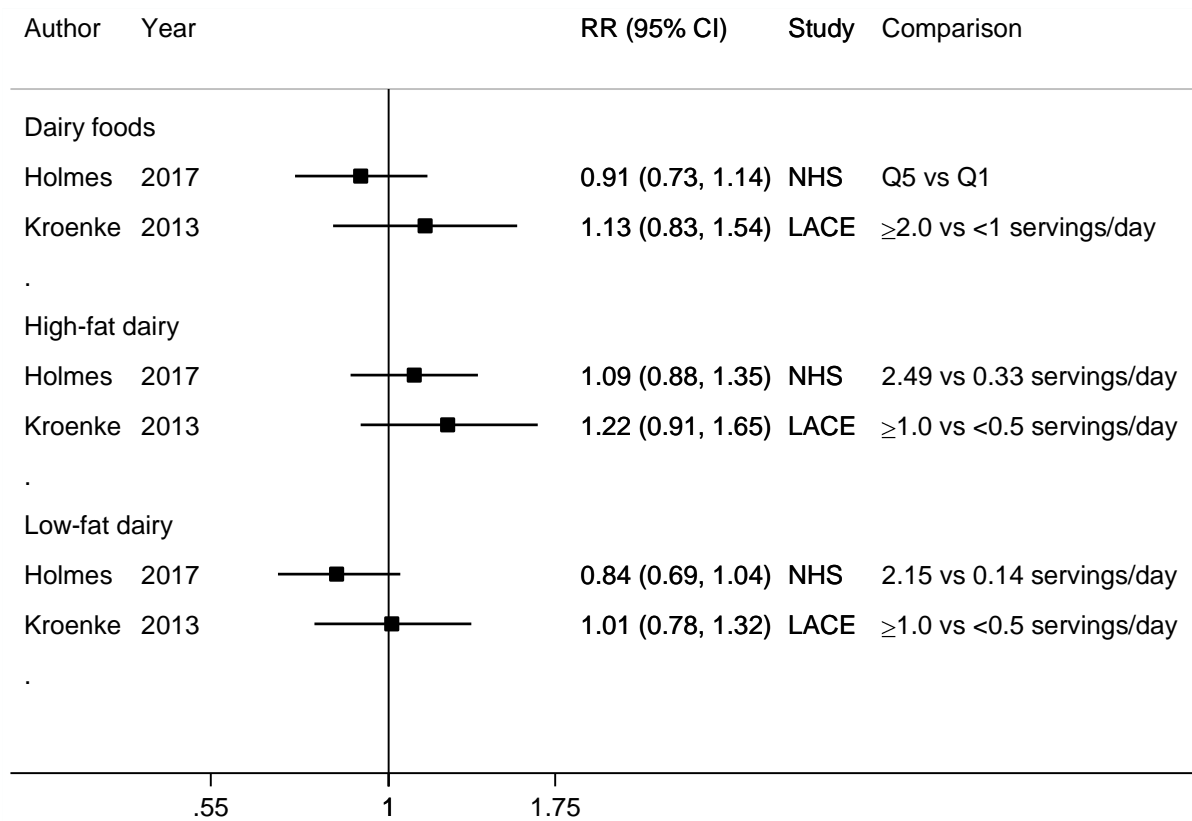

**Note:** The figure should not be interpreted as a quantitative summary.

\*Holmes 2017 exclusively included distant breast cancer recurrences.

One publication (Andersen, 2020) was not included in the forest plot because the point estimate was reported in continuous per each 200g/day increase (HR 0.98, 95% CI 0.91-1.06).

LACE, Life After Cancer Epidemiology Study; NHS, Nurses' Health Study; Q, quantile; RR, Relative Risk

**Supplementary Figure S8. Forest plot of breast cancer prognosis for the highest compared with the lowest level of carbohydrate intake after breast cancer diagnosis**

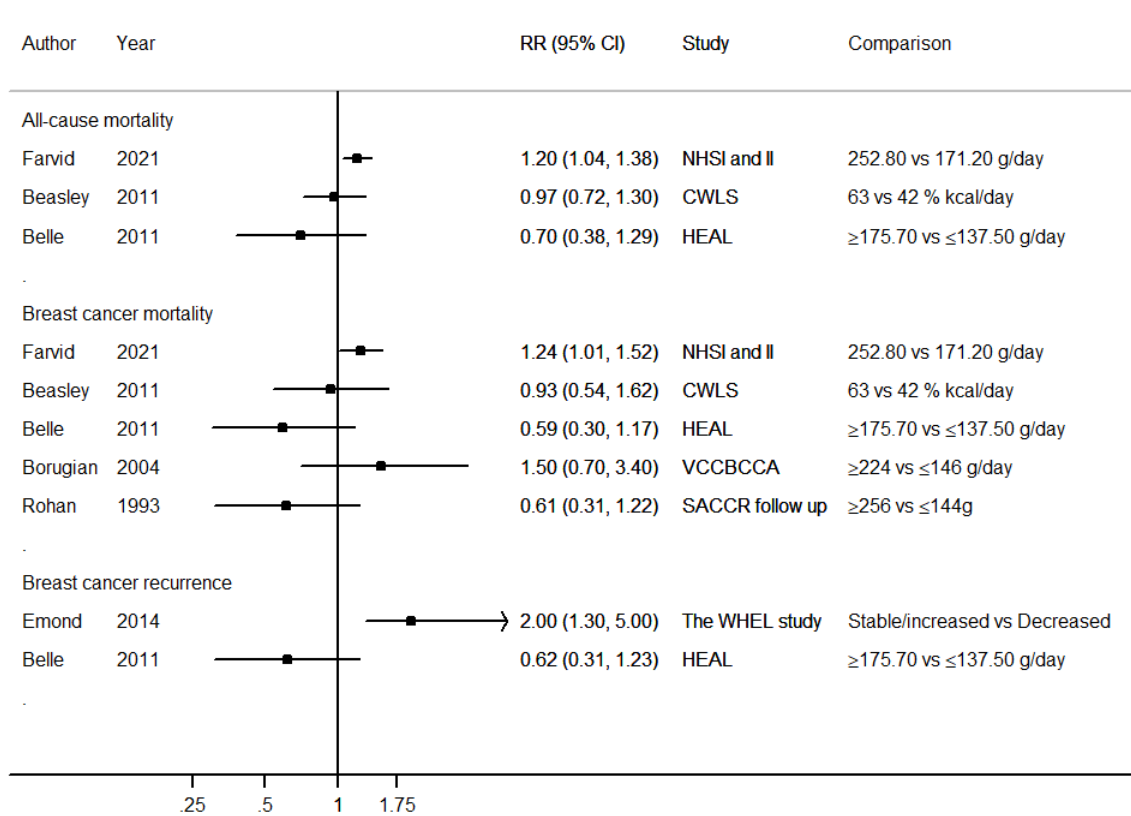

**Note:** The figure should not be interpreted as a quantitative summary.

CWLS, Collaborative Women’s Longevity Study; HEAL, Health, Eating, Activity, and Lifestyle Study; NHS, Nurses’ Health Study; Q, quantile; RR, Relative Risk; SACCR, South Australian Central Cancer Registry; WHEL, Women’s Healthy Eating and Living Study

**Supplementary Figure S9. Nonlinear dose-response meta-analysis of post-diagnosis carbohydrate intake and breast cancer-specific mortality**

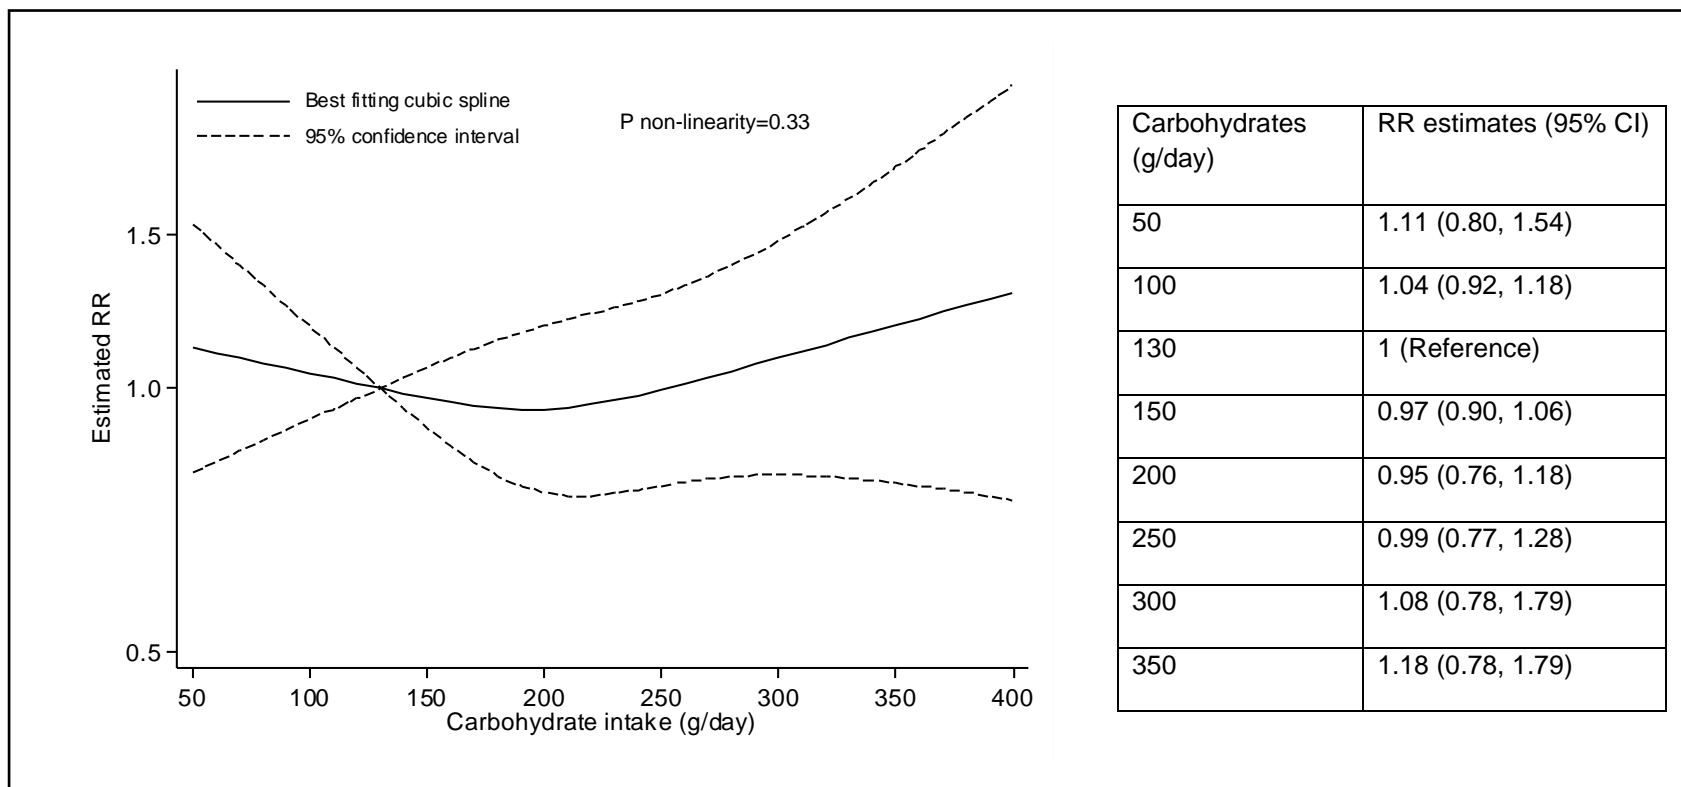

Non-linear curve was estimated using restricted cubic spline regression with three knots at 10th, 50th and 90th percentiles of distribution of the exposure and pooled in random-effects meta-analysis. Carbohydrate intake at 130 g/day was chosen as reference. The table shows selected carbohydrate intake values and their corresponding RR (95% CI) estimated in the non-linear dose-response meta-analysis



**Supplementary Figure S10. Forest plot of all-cause mortality for the highest compared with the lowest level of protein intake after breast cancer diagnosis**

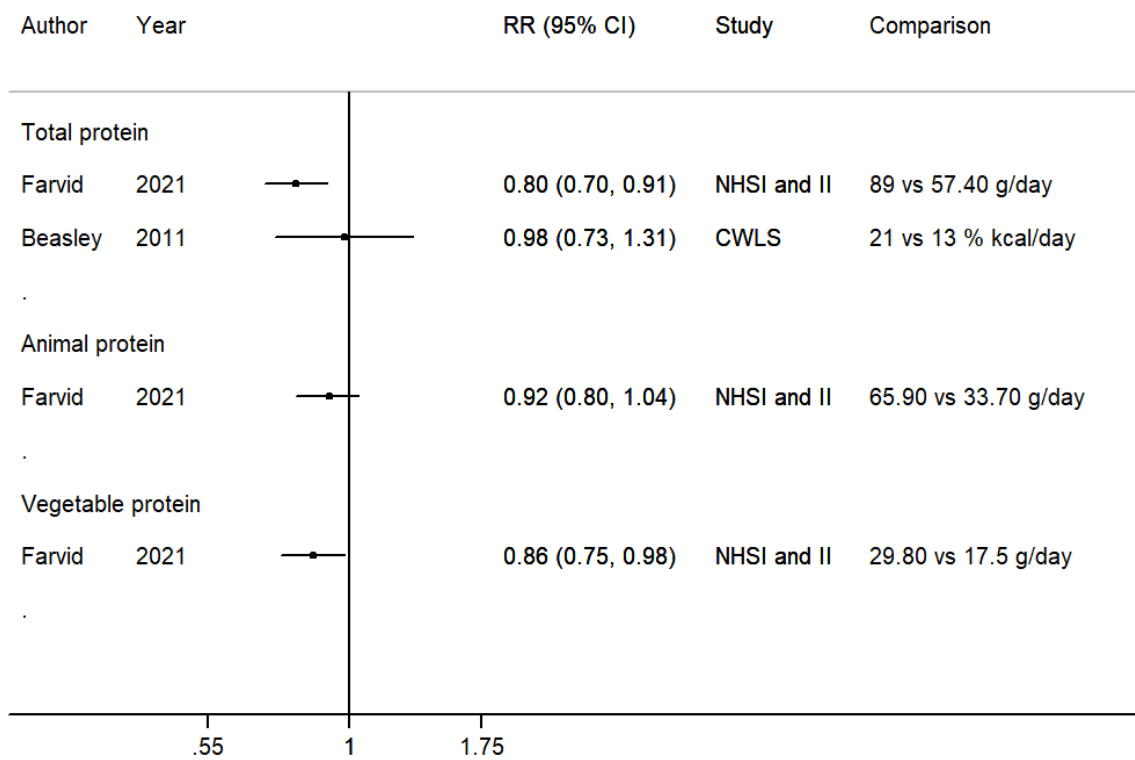

**Note:** The figure should not be interpreted as a quantitative summary.

CWLS, Collaborative Women’s Longevity Study; NHS, Nurses’ Health Study, RR, Relative Risk

**Supplementary Figure S11. Forest plot of breast cancer mortality for the highest compared with the lowest level of protein intake after breast cancer diagnosis**

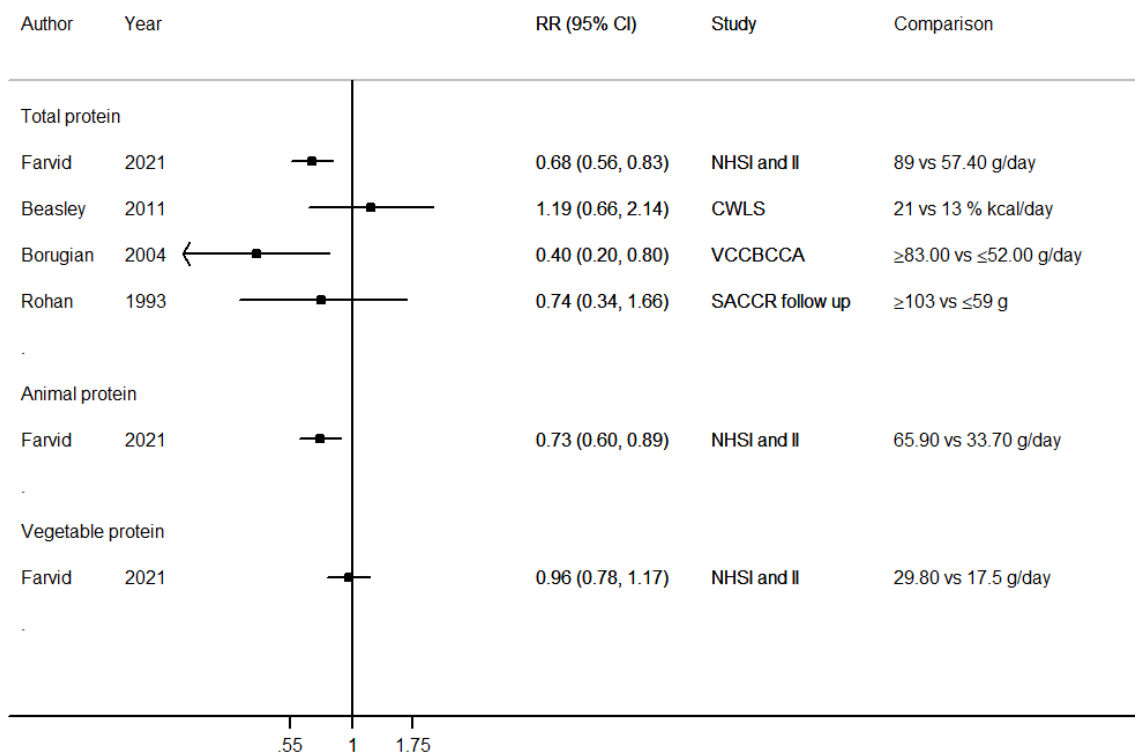

**Note:** The figure should not be interpreted as a quantitative summary.

CWLS, Collaborative Women’s Longevity Study; HEAL, Health, Eating, Activity, and Lifestyle Study; NHS, Nurses’ Health Study; Q, quantile; SACCR, South Australian Central Cancer Registry; RR, Relative risk

**Supplementary Figure S12. Forest plot of distant breast cancer recurrence for the highest compared with the lowest level of protein intake after breast cancer diagnosis**

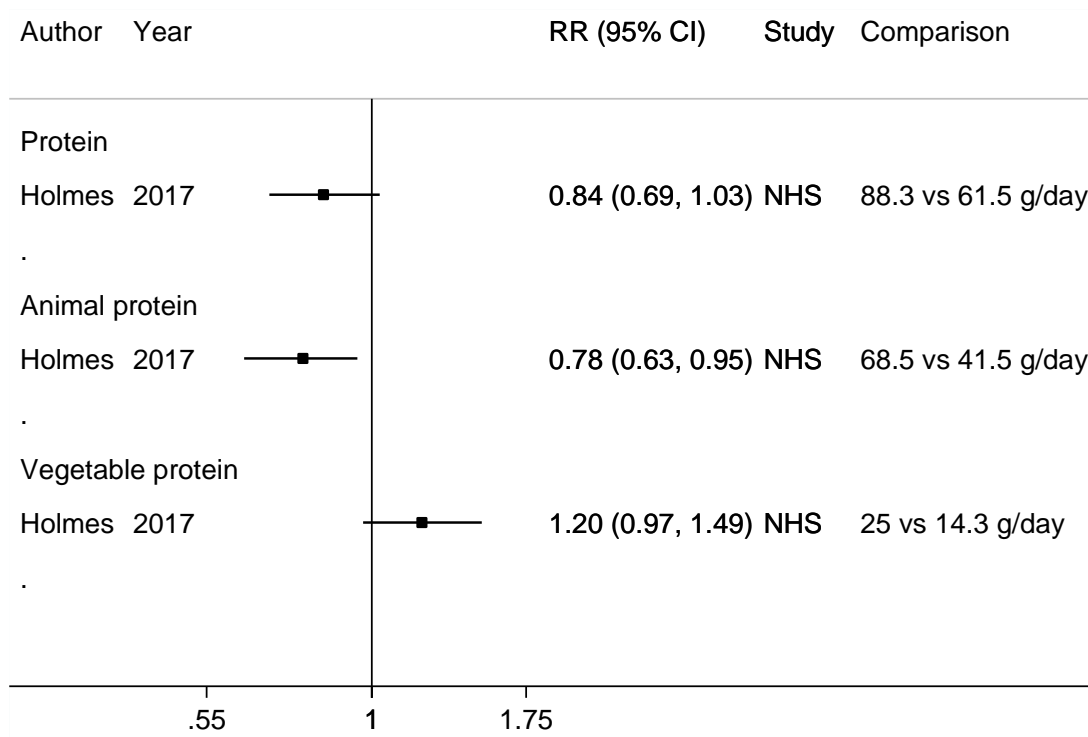

**Note:**

The figure should not be interpreted as a quantitative summary.

NHS, Nurses' Health Study; RR, Relative risk

**Supplementary Figure S13. Forest plot of all-cause mortality for the highest compared with the lowest level of fat intake after breast cancer diagnosis**

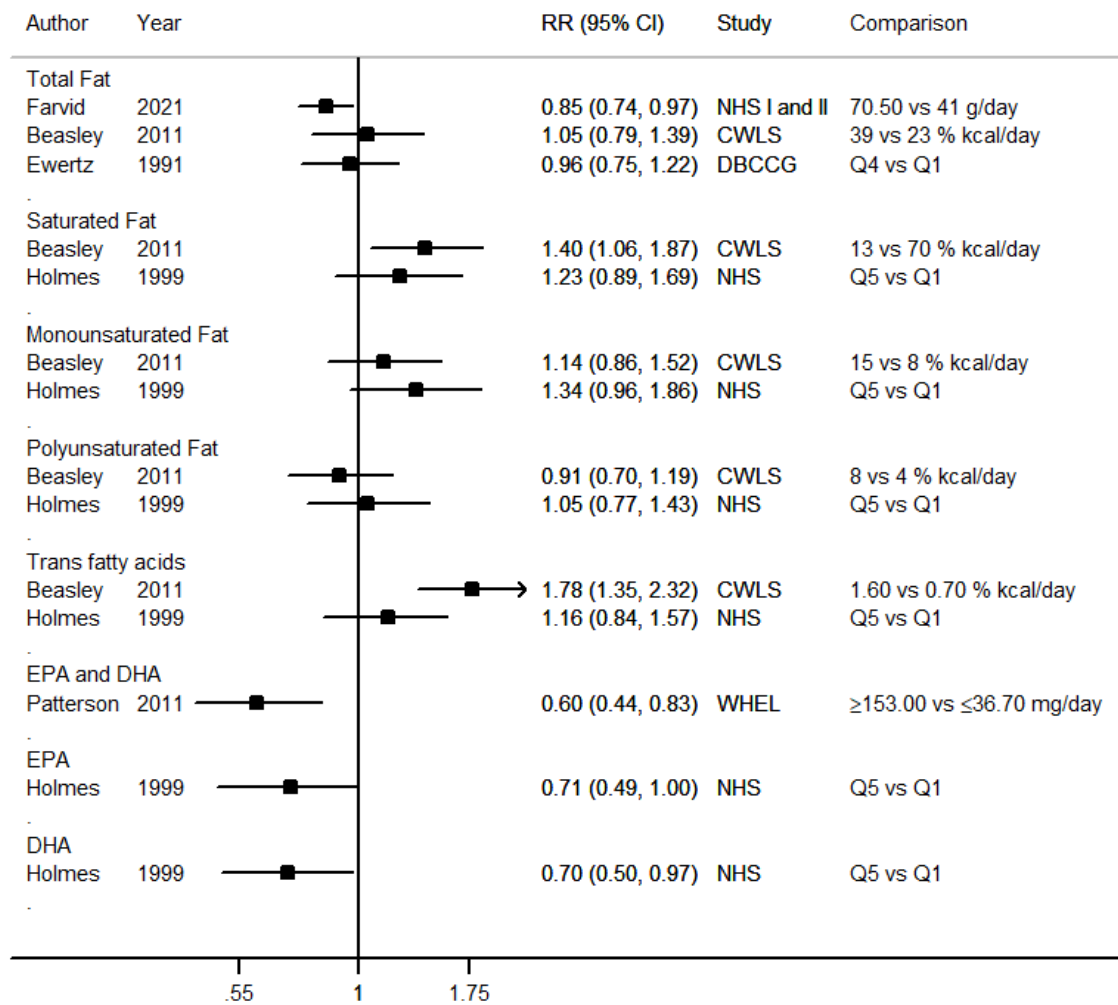

**Note:** The figure should not be interpreted as a quantitative summary.

CWLS, Collaborative Women's Longevity Study; DBCCG, Danish Breast Cancer Cooperative Group; NHS, Nurses' Health Study; RR, Relative Risk; WHEL, Women's Healthy Eating and Living Study

**Supplementary Figure S14. Forest plot of breast cancer mortality for the highest compared with the lowest level of fat intake after breast cancer diagnosis**

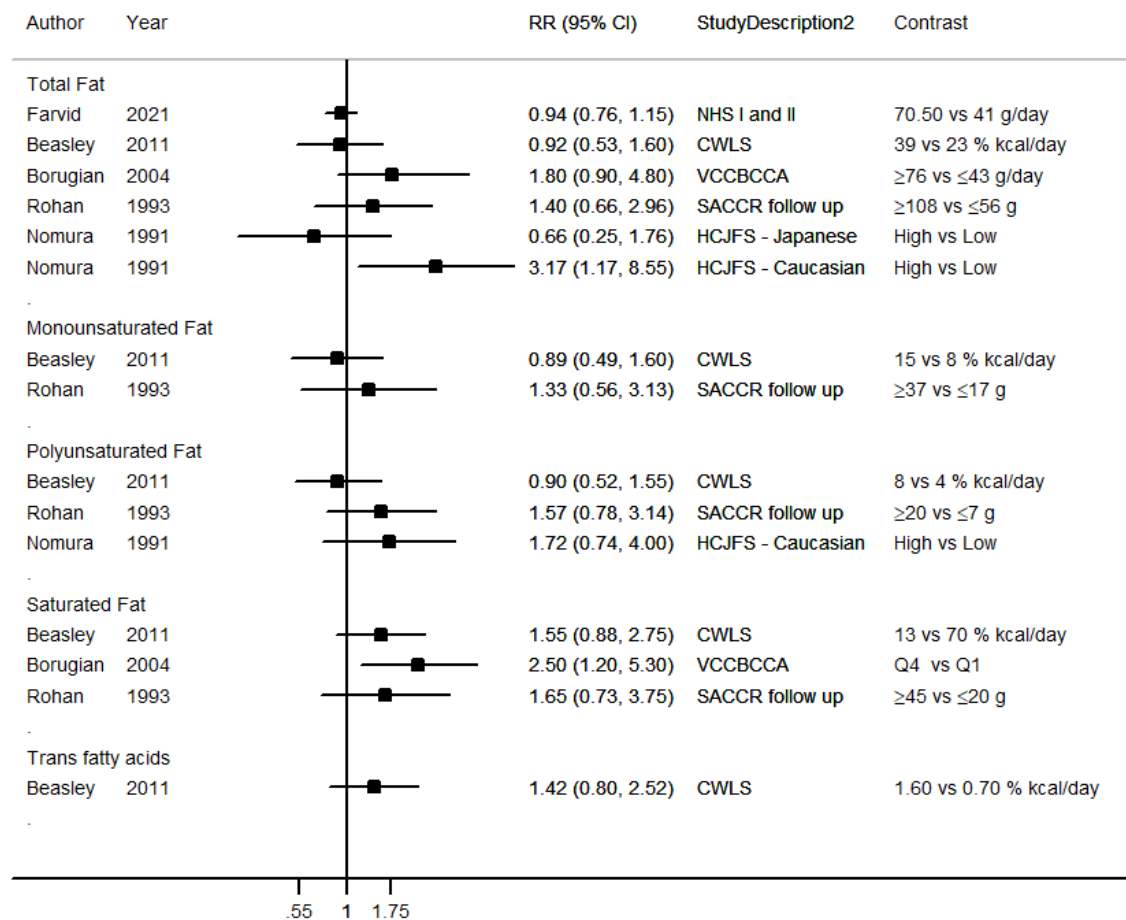

**Note:** The figure should not be interpreted as a quantitative summary.

CWLS, Collaborative Women’s Longevity Study; NHS, Nurses’ Health Study; Q, quantile; SACCR, South Australian Central Cancer Registry; VCCBCCA, Vancouver Cancer Centre of the British Columbia Cancer Agency; RR, Relative Risk

**Supplementary Figure S15. Forest plot of all-cause mortality for the highest compared with the lowest level of fibre intake after breast cancer diagnosis.**

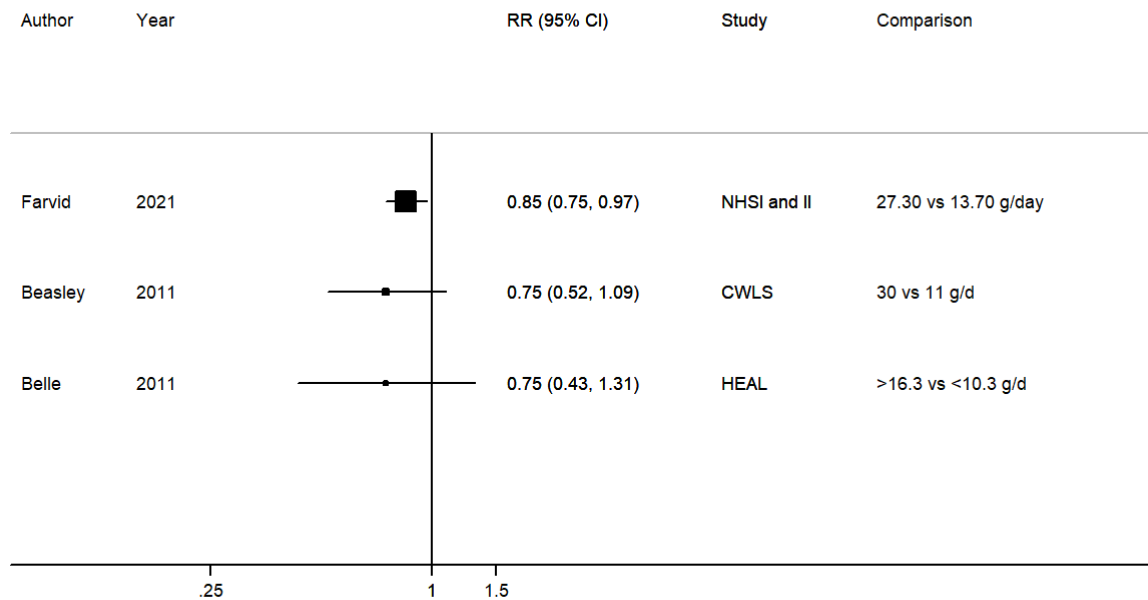

**Note:** The figure should not be interpreted as a quantitative summary.

CWLS, Collaborative Women’s Longevity Study; HEAL, Health, Eating, Activity, and Lifestyle Study; NHS, Nurses’ Health Study; RR, Relative Risk

**Supplementary Figure S16. Forest plot of breast cancer mortality for the highest compared with the lowest level of fibre intake after breast cancer diagnosis**

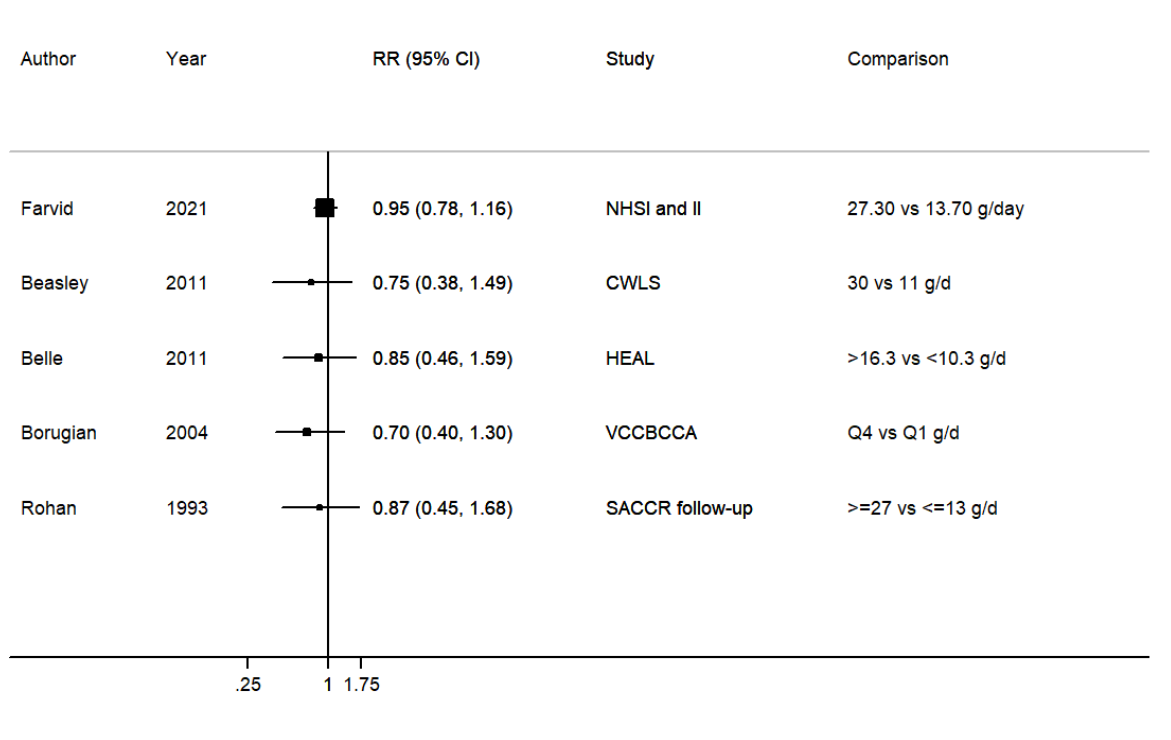

**Note:** The figure should not be interpreted as a quantitative summary.

CWLS, Collaborative Women’s Longevity Study; HEAL, Health, Eating, Activity, and Lifestyle Study; SACCR, South Australian Central Cancer Registry; VCCBCCA, Vancouver Cancer Centre of the British Columbia Cancer Agency; RR, Relative Risk

**Supplementary Figure S17. Forest plot of all-cause mortality for the highest compared to the lowest level of alcohol intake after breast cancer diagnosis**

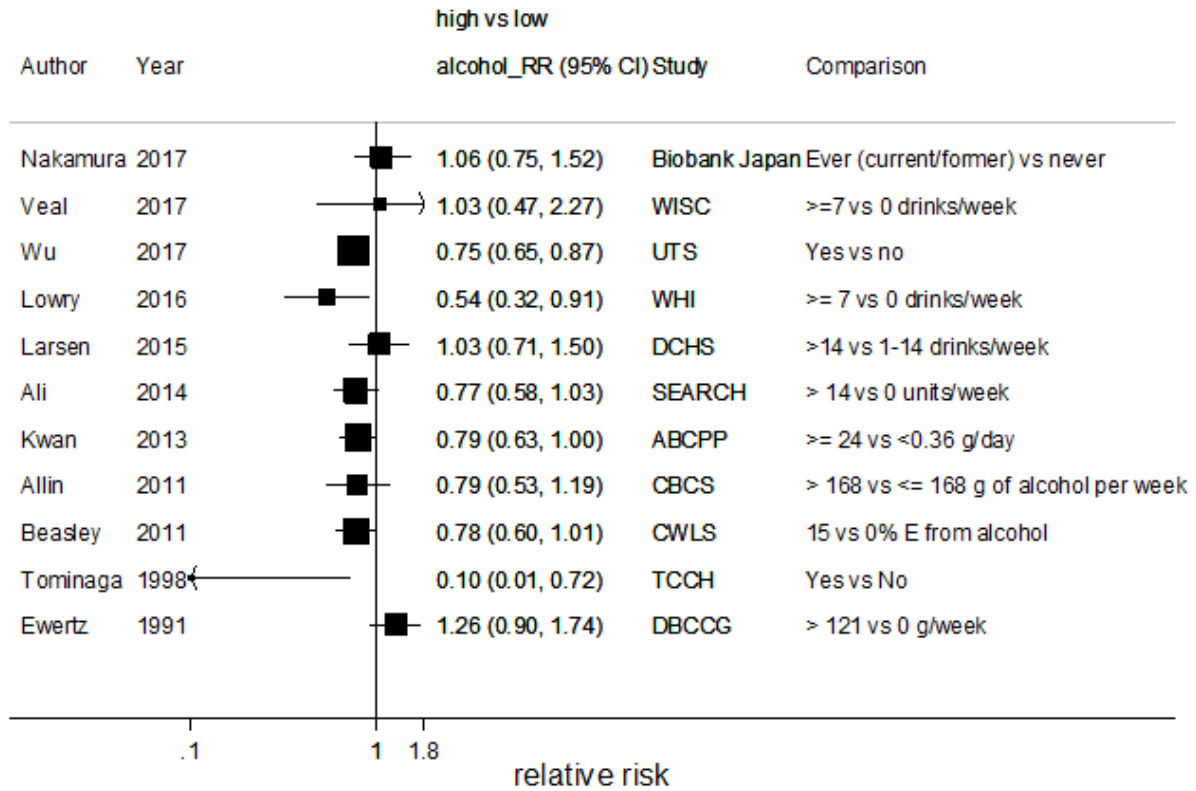

**Note:** The figure should not be interpreted as a quantitative summary.

ABCPP, After Breast Cancer Pooling Project; DCHS, Danish Diet, Cancer and Health Cohort; CBCS, California Breast cancer Survivorship consortium; CWLS, Collaborative Women's Longevity Study; DBCCG, Danish Breast Cancer Cooperative Group; SEARCH, Studies of Epidemiology and Risk factors in Cancer Heredity Breast Cancer Study; WHI, Women's Health Initiative; WISC, Wisconsin In Situ Cohort Study;



**Supplementary Figure S18. Forest plot of breast cancer mortality for the highest compared to the lowest level of alcohol intake after breast cancer diagnosis**

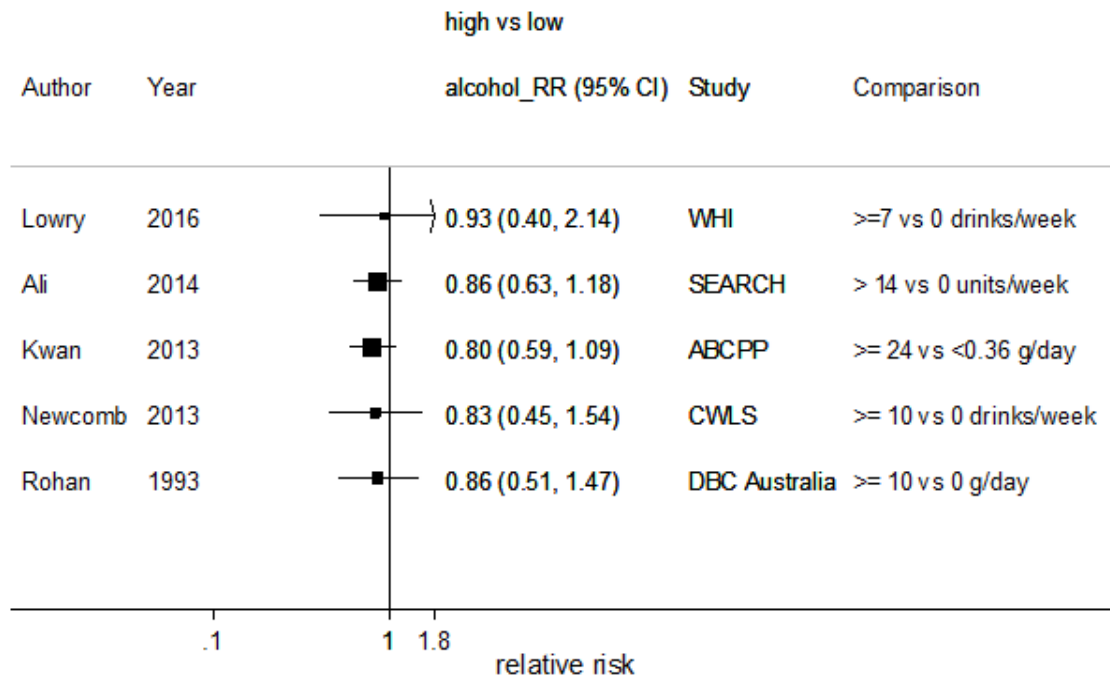

**Note:** The figure should not be interpreted as a quantitative summary.

ABCPP, After Breast Cancer Pooling Project; CWLS, Collaborative Women's Longevity Study; RR, Relative Risk; SEARCH, Studies of Epidemiology and Risk factors in Cancer Heredity Breast Cancer Study; WHI, Women's Health Initiative;

**Supplementary Figure S19. Forest plot of breast cancer recurrence for the highest compared to the lowest level of alcohol intake after breast cancer diagnosis**

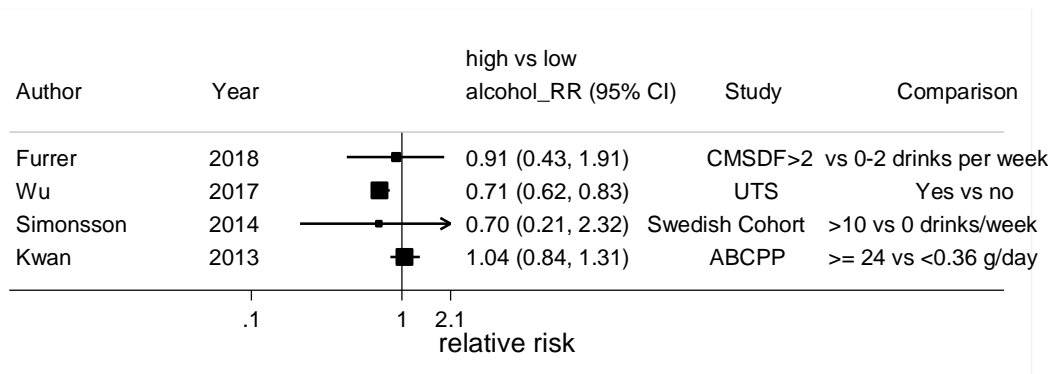

**Note:** The figure should not be interpreted as a quantitative summary.

ABCPP, After Breast Cancer Pooling Project; CMSDF, Centre des Maladies du Sein Deschênes-Fabia; CWLS, Collaborative Women's Longevity Study; RR, Relative Risk.

**Supplementary Figure S20. Forest plot of second cancer for the highest compared to the lowest level of alcohol intake after breast cancer diagnosis**

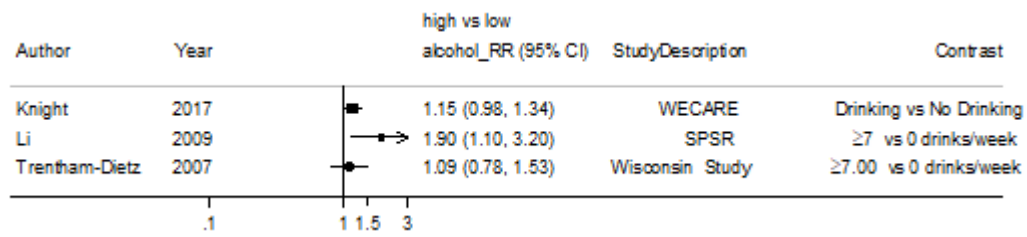

**Note:** The figure should not be interpreted as a quantitative summary.

RR, Relative Risk; SPSR, Seattle-Puget Sound region; WECARE, Women's Environmental Cancer and Radiation Epidemiology.

**Supplementary Figure S21. Nonlinear dose-response meta-analyses of post-diagnosis alcohol intake and all-cause mortality**

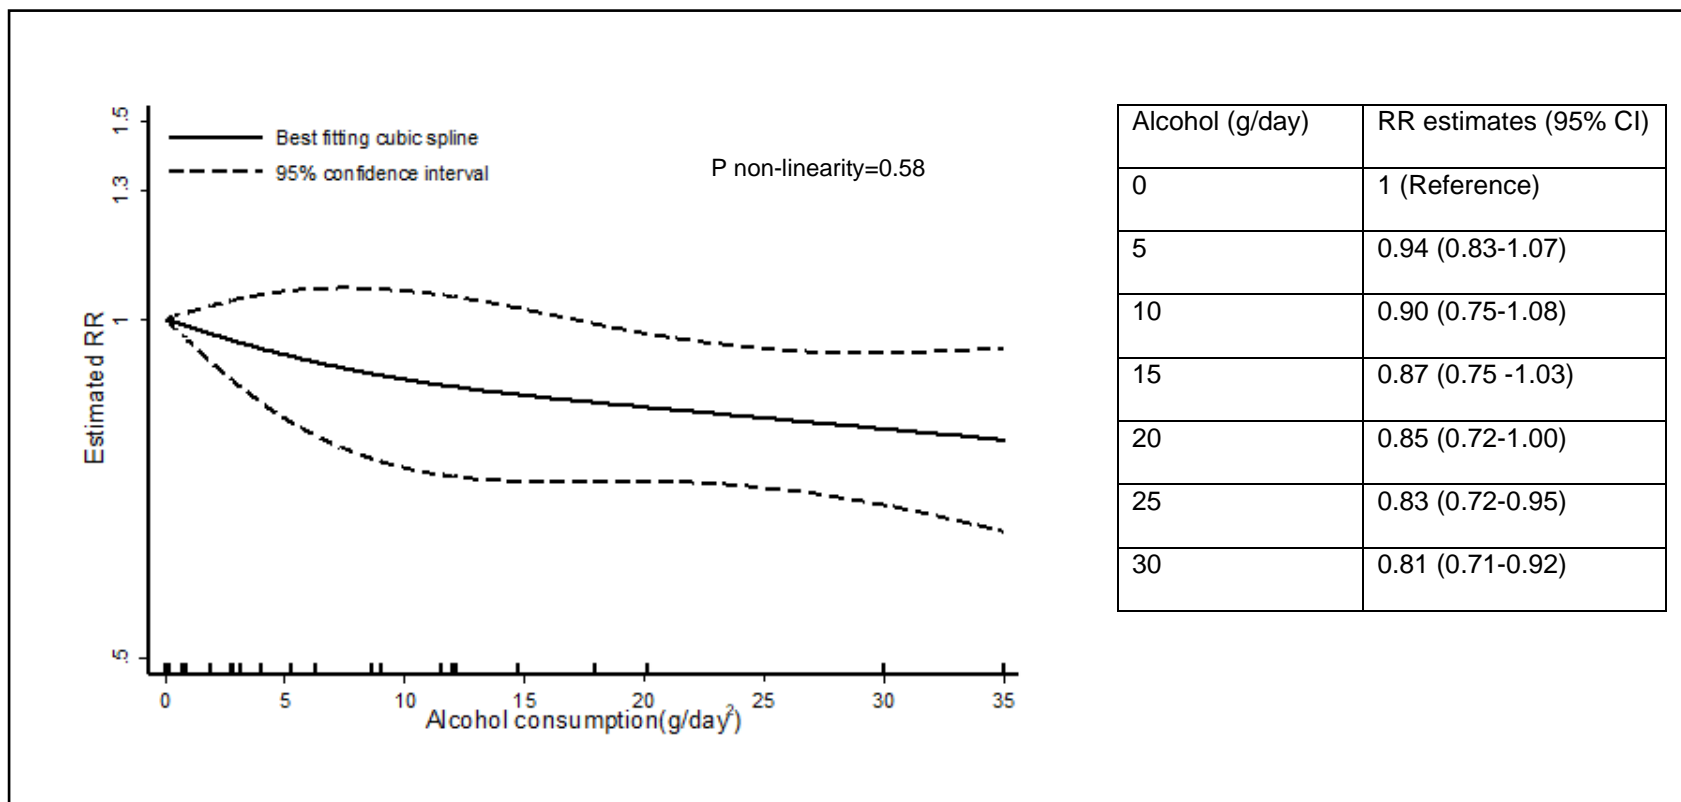

Non-linear curve was estimated using restricted cubic spline regression with three knots at 10th, 50th and 90th percentiles of distribution of the exposure and pooled in random-effects meta-analysis. Alcohol at 0 g/day was chosen as reference. The table shows selected alcohol intake values and their corresponding RR (95% CI) estimated in the non-linear dose-response meta-analysis

**Supplementary Figure S22. Nonlinear dose-response meta-analyses of post-diagnosis alcohol intake and breast cancer mortality**

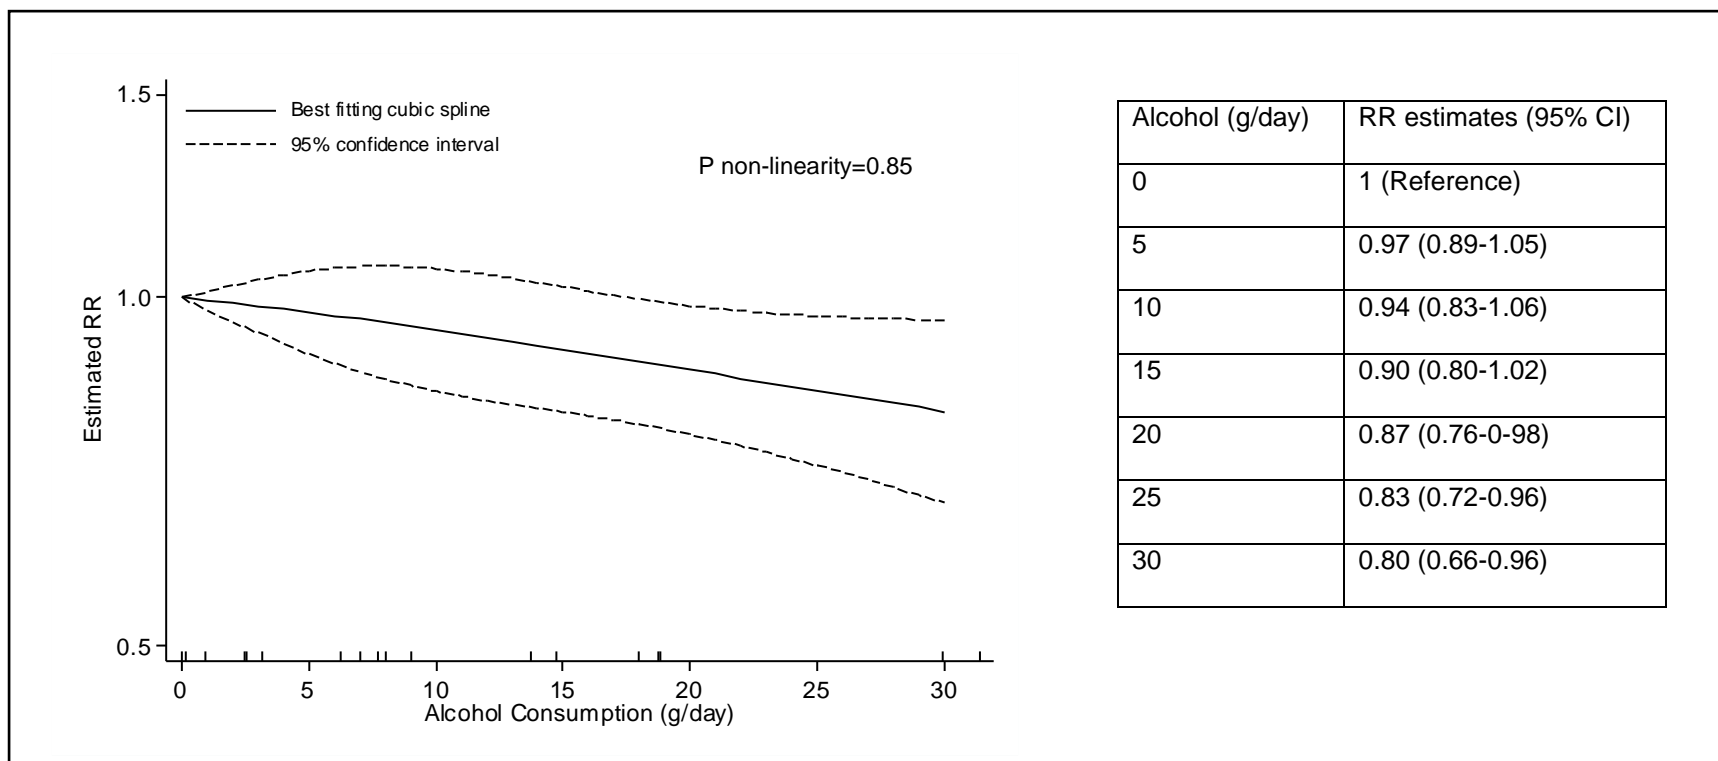

Non-linear curve was estimated using restricted cubic spline regression with three knots at 10th, 50th and 90th percentiles of distribution of the exposure and pooled in random-effects meta-analysis. Alcohol at 0 g/day was chosen as reference. The table shows selected alcohol intake values and their corresponding RR (95% CI) estimated in the non-linear dose-response meta-analysis

**Supplementary Figure S23. Forest plot of all-cause for the highest compared to the lowest level of vitamin D intake from diet and/or supplements after breast cancer diagnosis**

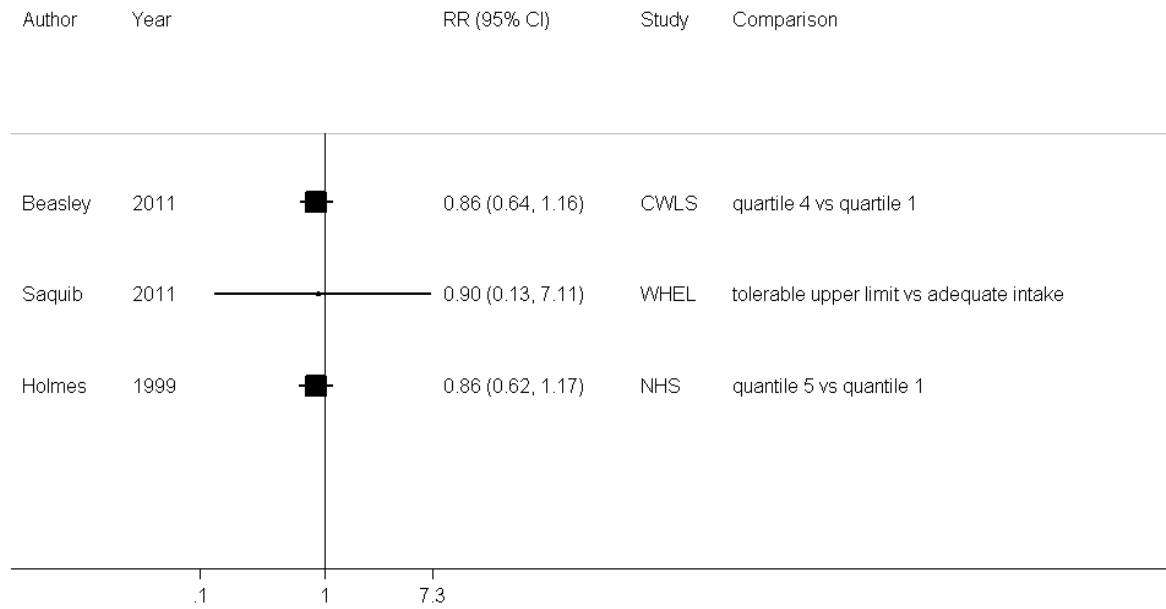

**Note:** The figure should not be interpreted as a quantitative summary.  
 CWLS, Collaborative Women’s Longevity Study; NHS, Nurses’ Health Study; RR, Relative Risk; WHEL, Women’s Healthy Eating and Living Study

**Supplementary Figure S24. Non-linear dose-response meta-analysis of post-diagnosis serum 25-hydroxyvitamin D and all-cause mortality**

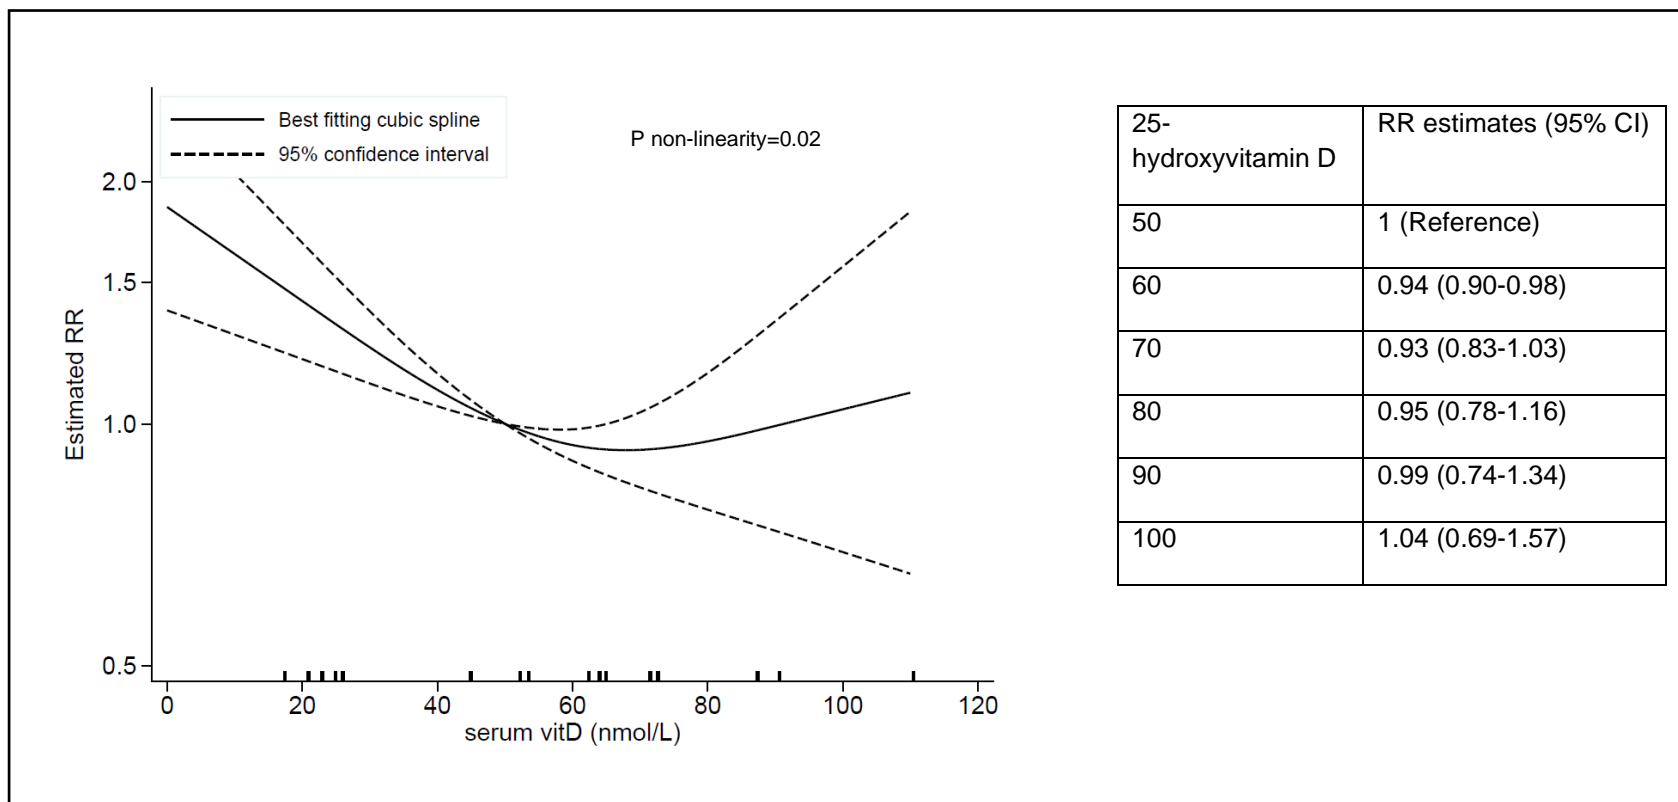

Non-linear curve was estimated using restricted cubic spline regression with three knots at 10th, 50th and 90th percentiles of distribution of the exposure and pooled in random-effects meta-analysis. Serum 25-hydroxyvitamin D at 50 nmol/L (20ng/ml) was chosen as reference. The table shows selected serum 25-hydroxyvitamin D values and their corresponding RR (95% CI) estimated in the non-linear dose-response meta-analysis

**Supplementary Figure S25. Meta-analysis for highest compared with the lowest level of post-diagnosis serum 25(OH)D collected before initiation treatment and all-cause mortality**

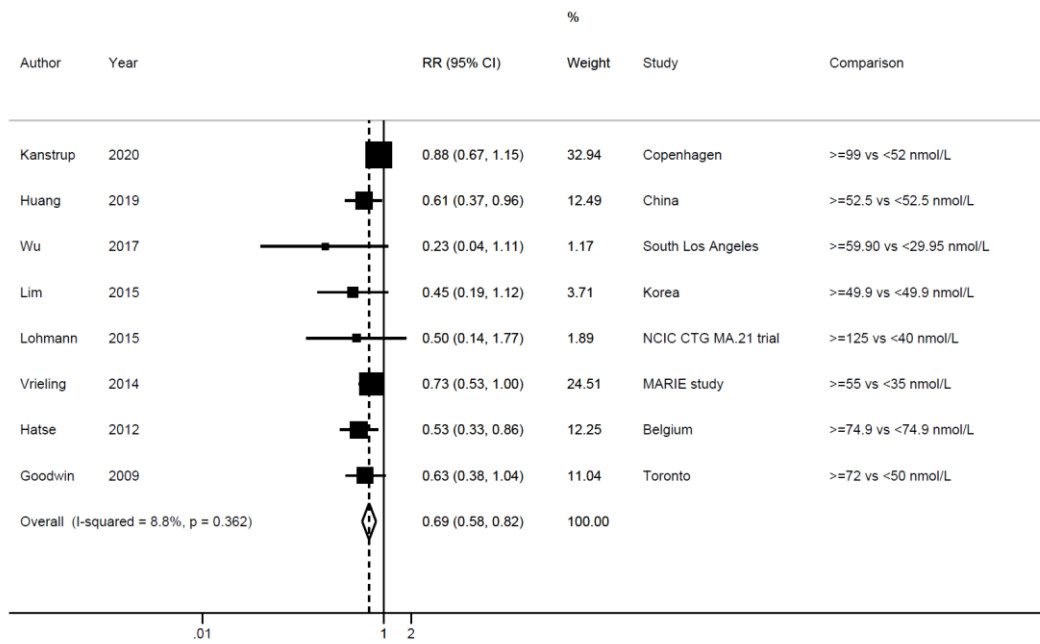

Data are expressed as relative risk and 95% confidence interval by using inverse-variance weighted DerSimonian-Laird random-effects model. Diamonds represents the pooled risk estimates.

NCIC CTG, National Cancer Institute of Canada Clinical Trials Group; MARIE, Mammary carcinoma risk factor Investigation;



**Supplementary Figure S26. Linear dose-response meta-analysis per 10 nmol/L increase of post-diagnosis serum 25(OH)D collected before initiation treatment and all-cause mortality**

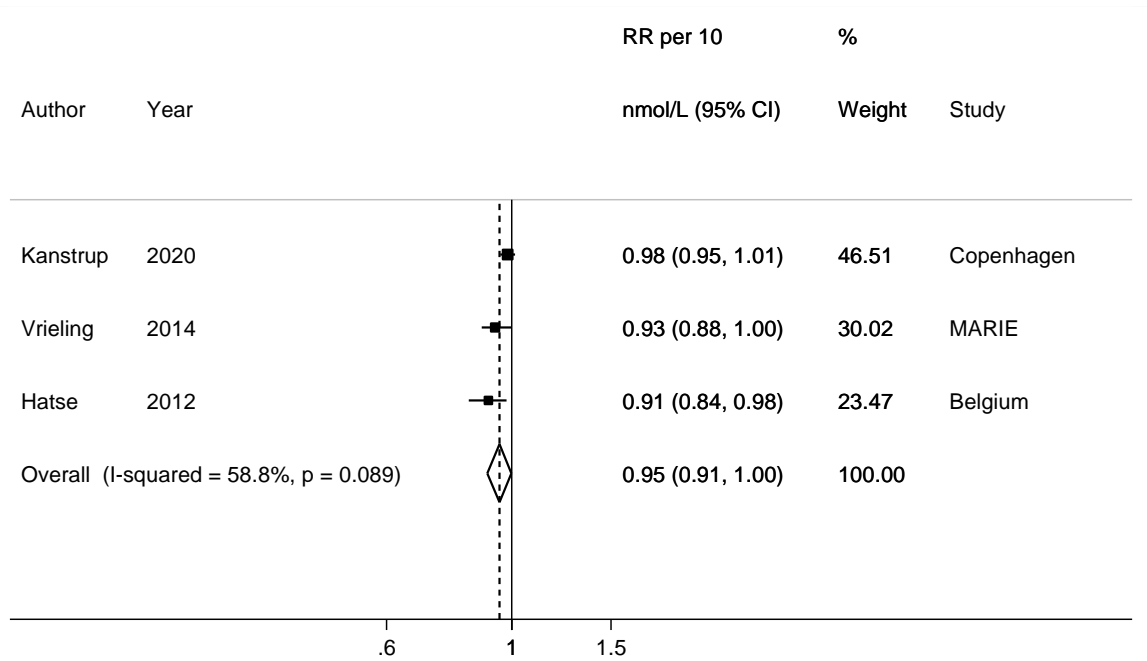

Data are expressed as relative risk and 95% confidence interval by using inverse-variance weighted DerSimonian-Laird random-effects model. Diamonds represents the pooled risk estimates.

Abbreviations: MARIE, Mammary carcinoma risk factor Investigation; RR, relative risk.

**Supplementary Figure S27. Meta-analysis for highest compared with the lowest level of post-diagnosis serum 25(OH)D collected before initiation treatment and breast cancer mortality**

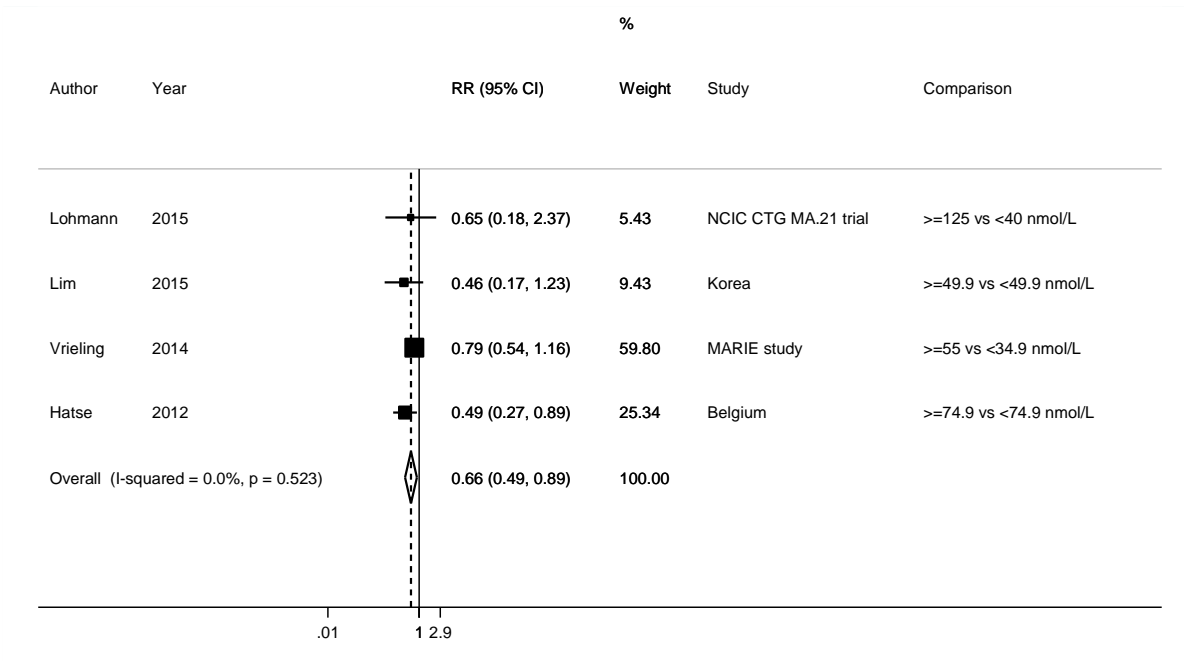

Data are expressed as relative risk and 95% confidence interval by using inverse-variance weighted DerSimonian-Laird random-effects model. Diamonds represents the pooled risk estimates.

NCIC CTG, National Cancer Institute of Canada Clinical Trials Group; MARIE, Mammary carcinoma risk factor Investigation;

## Supplementary Figure S28. Forest plot of breast cancer recurrence for the highest compared to the lowest level of serum 25(OH)D after breast cancer diagnosis

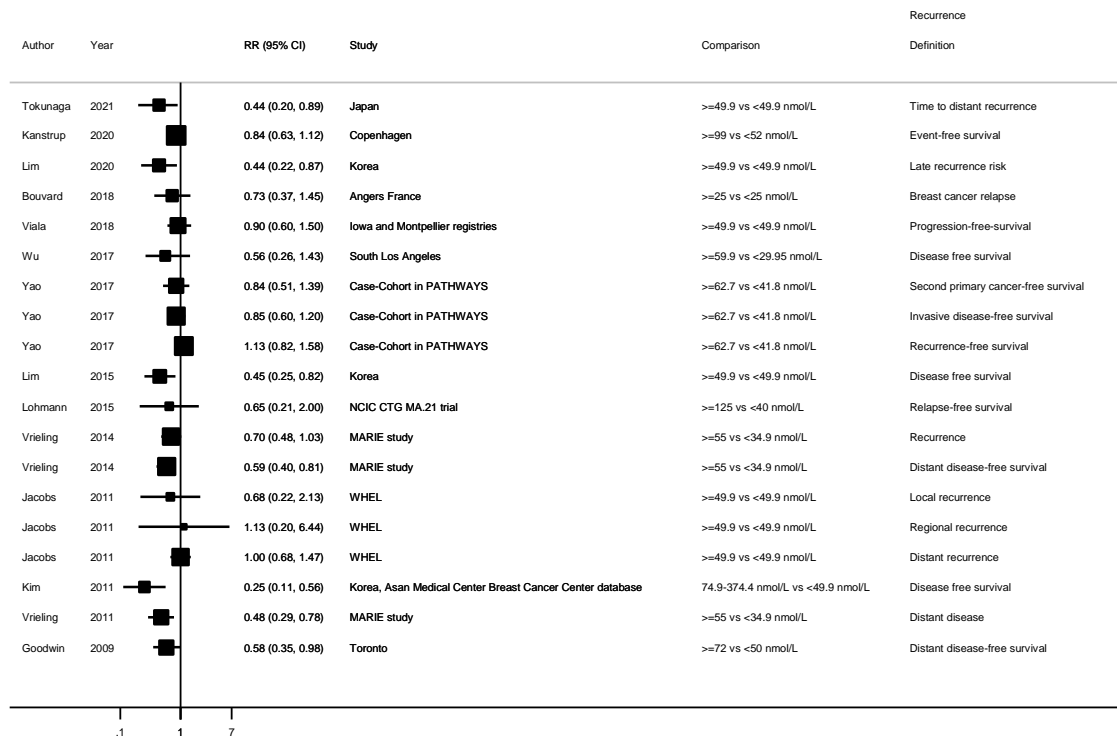

**Note:** The figure should not be interpreted as a quantitative summary. The same study may be represented more than once if different breast cancer recurrence definitions were investigated. The figure should not be interpreted as a quantitative summary.

MARIE, Mammary carcinoma risk factor Investigation; NCIC CTG, National Cancer Institute of Canada Clinical Trials Group; RR, Relative Risk; WHEL, Women's Healthy Eating and Living Study

## **APPENDIX 2**

### **Material and methods**

#### **Data extraction**

Relevant data were extracted in the CUP Global database at Imperial College London including author's last name, publication year, study name and study type, participants characteristics. Disease characteristics and treatment information. Inclusion, exclusion criteria of the participants in the study, dietary assessment method and if validated or not. Time between exposure assessment and diagnosis, follow-up time and time frame. Exposures and outcome of interest, effect size, 95% confidence intervals (CIs), and p-values and type of variables if they were quantiles, categories or continuous and adjustments. Authors of the reviewed studies were not contacted if there were missing, unclear data.

#### **Outcome definition**

Breast cancer recurrence was defined differently in the studies. In some studies, the term "recurrence/relapse-free survival" or "breast cancer recurrence" was used; while in others, the terms "disease-free survival", "event-free survival", "progression-free survival", or "additional breast cancer events" were used. In some studies, the events included in the definition of recurrence were local, regional and/or distant recurrence (metastasis). Other studies included second primary breast cancer or any primary cancer, breast cancer-related death, any cause of death, or any combination of these as events under recurrence. All such studies were reviewed under "recurrence", and when more than one "recurrence" outcomes were reported in a study, the outcome with the highest number of events, most often including any death (disease-free survival) was selected.

#### **Risk of bias assessment**

The quality of individual studies was not graded using a specific tool. Instead, relevant study characteristics that could be used to explore potential sources of bias were included into the CUP Global database. For all the included studies, information on potential for selection bias, information bias of exposure and outcome assessment, and residual confounding by cancer stage and treatment was retrieved after identifying the most likely influential sources of bias in cancer survival studies<sup>119, 120</sup>. Details on how the study authors addressed the potential biases were also included. In the Expert Panel meeting, whether the studies had serious quality issues were discussed when judging the evidence for each exposure-outcome association. When possible, the potential influence of measurement error, length of follow-up and

loss to follow-up, and adjustment for confounding factors on results was tested in subgroup meta-analyses and meta-regression analyses.

### **Statistical analysis**

Meta-analysis was conducted when at least three new studies per exposure and outcome (compared to the WCRF/AICR Third Expert Report with evidence up to 30 June 2012) were identified. The linear dose-response meta-analysis<sup>121, 122</sup> was the preferred option to summarize the strength of the associations. The relative risk (RR) and 95% CIs were summarized, using an inverse-variance weighted DerSimonian-Laird random-effects model<sup>123</sup>. We directly used the dose-response estimate provided in the original studies when available. The generalized least-square for trend estimation method described by Greenland and Longnecker<sup>121, 124</sup> was used to compute estimates per exposure increment unit in those studies reporting categorical risk estimates. To perform this method, information about risk estimates with their corresponding 95%CI, doses, and the total number of participants or person-years and cases for at least three categories of exposures were required. If directly reported, the mean or median within each exposure category was assigned to the RR. If studies reported ranges, we used the midpoint of each category. For open-ended extreme categories, the midpoint was estimated assuming its width to be the same as the adjacent category. If person-years or total number of participants per category were not available, we assumed equal size categories and divided the total number of persons or person-years by the number of quantiles. For studies not reporting the serving size, we used 80g as the unit of conversion for fruits. For total dairy products, 177g was used, which is a serving size reported in the US Department of Agriculture Food and Nutrient Database for Dietary Studies as most studies were from the USA. One study<sup>33</sup> on alcohol intake reported exposure as a percentage of energy intake from alcohol. It was converted to grams per day using the energy intake (kcal/day) of each quintile reported in the paper.

Subgroup meta-analysis based on exposure timing respective to cancer treatment (before, during, and/or after neoadjuvant/adjuvant treatment) was performed when sufficient studies were available.

Leave-one-out analysis was conducted to inspect influence from individual studies on the summary estimate<sup>125</sup>.

Potential non-linear dose-response associations were explored using restricted cubic splines with three knots at 10%, 50%, and 90% percentiles of the distribution, which were combined using multivariate meta-analysis<sup>126, 127</sup>. Non-linearity was tested using

the likelihood ratio test and comparing the linear- with the non-linear dose-response meta-analysis.

When linear and non-linear dose-response meta-analyses were not possible, we performed a descriptive synthesis, where the findings of the individual studies were systematically gathered, tabulated, and descriptively summarised by type of dietary exposure and outcome analysed. A forest plot for the RR comparing extreme exposure categories was presented to aid results interpretation.

Stata 13.1 (StataCorp, College Station, TX, USA) was used.

## References

1. Reddy G, D T. Dietary fat reduction improves relapse-free survival in postmenopausal women previously treated for early-stage breast cancer: Results from a phase III women's intervention nutrition study. *Clin Breast Cancer Journal Translated Name Clinical Breast Cancer* 2005;**6**: 112-4.
2. Chlebowski RTB, G. L. Thomson, C. A. Nixon, D. W. Shapiro, A. Hoy, M. K. Goodman, M. T. Giuliano, A. E. Karanja, N. McAndrew, P. Hudis, C. Butler, J. Merkel, D. Kristal, A. Caan, B. Michaelson, R. Vinciguerra, V. Del Prete, S. Winkler, M. Hall, R. Simon, M. Winters, B. L. Elashoff, R. M. Dietary fat reduction and breast cancer outcome: interim efficacy results from the Women's Intervention Nutrition Study. *Journal of the National Cancer Institute* 2006;**98**: 1767-76.
3. Pierce JPN, L. Caan, B. J. Parker, B. A. Greenberg, E. R. Flatt, S. W. Rock, C. L. Kealey, S. Al-Delaimy, W. K. Bardwell, W. A. Carlson, R. W. Emond, J. A. Faerber, S. Gold, E. B. Hajek, R. A. Hollenbach, K. Jones, L. A. Karanja, N. Madlensky, L. Marshall, J. Newman, V. A. Ritenbaugh, C. Thomson, C. A. Wasserman, L. Stefanick, M. L. Influence of a diet very high in vegetables, fruit, and fiber and low in fat on prognosis following treatment for breast cancer: the Women's Healthy Eating and Living (WHEL) randomized trial. *Jama* 2007;**298**: 289-98.
4. Gold EBP, J. P. Natarajan, L. Stefanick, M. L. Laughlin, G. A. Caan, B. J. Flatt, S. W. Emond, J. A. Saquib, N. Madlensky, L. Kealey, S. Wasserman, L. Thomson, C. A. Rock, C. L. Parker, B. A. Karanja, N. Jones, V. Hajek, R. A. Pu, M. Mortimer, J. E. Dietary pattern influences breast cancer prognosis in women without hot flashes: the women's healthy eating and living trial. *J Clin Oncol* 2009;**27**: 352-9.
5. Pierce JPN, L. Caan, B. J. Flatt, S. W. Kealey, S. Gold, E. B. Hajek, R. A. Newman, V. A. Rock, C. L. Pu, M. Saquib, N. Stefanick, M. L. Thomson, C. A. Parker, B. Dietary change and reduced breast cancer events among women without hot flashes after treatment of early-stage breast cancer: subgroup analysis of the Women's Healthy Eating and Living Study. *The American journal of clinical nutrition* 2009;**89**: 1565s-71s.
6. Rock C, L N, M P, C T, S F, B C, E G, W A-D, V N, R H, M S, J P, et al. Longitudinal biological exposure to carotenoids is associated with breast cancer-free survival in the women's healthy eating and living study. *Cancer Epidemiol Biomarkers Prev* 2009;**18**: 486-94.
7. Kroenke CHF, T. T. Hu, F. B. Holmes, M. D. Dietary patterns and survival after breast cancer diagnosis. *J Clin Oncol* 2005;**23**: 9295-303.
8. Kwan MLW, E. Kushi, L. H. Castillo, A. Slattery, M. L. Caan, B. J. Dietary patterns and breast cancer recurrence and survival among women with early-stage breast cancer. *J Clin Oncol* 2009;**27**: 919-26.
9. Lei Y, Ho SC, Kwok C, Cheng AC, Cheung KL, Lee R, Yeo W. Dietary Pattern at 18-Month Post-Diagnosis and Outcomes of Breast Cancer Among Chinese Women with Early-Stage Breast Cancer. *Cancer Manag Res* 2021;**13**: 4553-65.
10. Inoue-Choi M RK, Lazovich D. Adherence to the WCRF/AICR guidelines for cancer prevention is associated with lower mortality among older female cancer survivors. *Cancer Epidemiol Biomarkers Prev* 2013;**22**: 792-802.
11. Pierce JPS, M. L. Flatt, S. W. Natarajan, L. Sternfeld, B. Madlensky, L. Al-Delaimy, W. K. Thomson, C. A. Kealey, S. Hajek, R. Parker, B. A. Newman, V. A. Caan, B. Rock, C. L. Greater survival after breast cancer in physically active women with high vegetable-fruit intake regardless of obesity. *J Clin Oncol* 2007;**25**: 2345-51.
12. Jang HC, M. S. Kang, S. S. Park, Y. Association between the Dietary Inflammatory Index and Risk for Cancer Recurrence and Mortality among Patients with Breast Cancer. *Nutrients* 2018;**10**: 1095.

13. Zheng JT, F. K. Zhang, J. Liese, A. D. Shivappa, N. Ockene, J. K. Caan, B. Kroenke, C. H. Hébert, J. R. Steck, S. E. Association between Post-Cancer Diagnosis Dietary Inflammatory Potential and Mortality among Invasive Breast Cancer Survivors in the Women's Health Initiative. *Cancer epidemiology, biomarkers & prevention : a publication of the American Association for Cancer Research, cosponsored by the American Society of Preventive Oncology* 2018;**27**: 454-63.
14. Wang K, Sun JZ, Wu QX, Li ZY, Li DX, Xiong YF, Zhong GC, Shi Y, Li Q, Zheng J, Shivappa N, Hebert JR, et al. Long-term anti-inflammatory diet in relation to improved breast cancer prognosis: a prospective cohort study. *NPJ Breast Cancer* 2020;**6**: 36.
15. McCullough MLG, S. M. Shah, R. Campbell, P. T. Wang, Y. Doyle, C. Gaudet, M. M. Pre-and postdiagnostic diet in relation to mortality among breast cancer survivors in the CPS-II Nutrition Cohort. *Cancer causes & control : CCC* 2016;**27**: 1303-14.
16. Ergas IJ, Cespedes Feliciano EM, Bradshaw PT, Roh JM, Kwan ML, Cadenhead J, Santiago-Torres M, Troeschel AN, Laraia B, Madsen K, Kushi LH. Diet Quality and Breast Cancer Recurrence and Survival: The Pathways Study. *JNCI Cancer Spectr* 2021;**5**: pkab019.
17. George SMI, M. L. Smith, A. W. Neuhouser, M. L. Reedy, J. McTiernan, A. Alfano, C. M. Bernstein, L. Ulrich, C. M. Baumgartner, K. B. Moore, S. C. Albanes, D. Mayne, S. T. Gail, M. H. Ballard-Barbash, R. Postdiagnosis diet quality, the combination of diet quality and recreational physical activity, and prognosis after early-stage breast cancer. *Cancer causes & control : CCC* 2011;**22**: 589-98.
18. George SMB-B, R. Shikany, J. M. Caan, B. J. Freudenheim, J. L. Kroenke, C. H. Vitolins, M. Z. Beresford, S. A. Neuhouser, M. L. Better postdiagnosis diet quality is associated with reduced risk of death among postmenopausal women with invasive breast cancer in the women's health initiative. *Cancer epidemiology, biomarkers & prevention : a publication of the American Association for Cancer Research, cosponsored by the American Society of Preventive Oncology* 2014;**23**: 575-83.
19. Karavasiloglou N, Pestoni G, Faeh D, Rohrmann S. Post-Diagnostic Diet Quality and Mortality in Females with Self-Reported History of Breast or Gynecological Cancers: Results from the Third National Health and Nutrition Examination Survey (NHANES III). *Nutrients* 2019;**11**.
20. Sun YB, W. Liu, B. Caan, B. J. Lane, D. S. Millen, A. E. Simon, M. S. Thomson, C. A. Tinker, L. F. Van Horn, L. V. Vitolins, M. Z. Snetselaar, L. G. Changes in Overall Diet Quality in Relation to Survival in Postmenopausal Women with Breast Cancer: Results from the Women's Health Initiative. *Journal of the Academy of Nutrition and Dietetics* 2018;**118**: 1855-63.e6.
21. Wang F, Cai H, Gu K, Shi L, Yu D, Zhang M, Zheng W, Zheng Y, Bao P, Shu XO. Adherence to Dietary Recommendations among Long-Term Breast Cancer Survivors and Cancer Outcome Associations. *Cancer epidemiology, biomarkers & prevention : a publication of the American Association for Cancer Research, cosponsored by the American Society of Preventive Oncology* 2020;**29**: 386-95.
22. Kim EHW, W. C. Fung, T. Rosner, B. Holmes, M. D. Diet quality indices and postmenopausal breast cancer survival. *Nutrition and cancer* 2011;**63**: 381-8.
23. Izano MAF, T. T. Chiuve, S. S. Hu, F. B. Holmes, M. D. Are diet quality scores after breast cancer diagnosis associated with improved breast cancer survival? *Nutrition and cancer* 2013;**65**: 820-6.
24. Wang T, Farvid MS, Kang JH, Holmes MD, Rosner BA, Tamimi RM, Willett WC, Eliassen AH. Diabetes Risk Reduction Diet and Survival after Breast Cancer Diagnosis. *Cancer Res* 2021;**81**: 4155-62.



25. Anyene IC, Ergas IJ, Kwan ML, Roh JM, Ambrosone CB, Kushi LH, Cespedes Feliciano EM. Plant-Based Dietary Patterns and Breast Cancer Recurrence and Survival in the Pathways Study. *Nutrients* 2021;**13**.
26. Wu T, Hsu FC, Pierce JP. Increased Acid-Producing Diet and Past Smoking Intensity Are Associated with Worse Prognoses Among Breast Cancer Survivors: A Prospective Cohort Study. *J Clin Med* 2020;**9**.
27. Mohseny M, Shekarriz-Foumani R, Amiri P, Vejdani M, Farshidmehr P, Mahmoudabadi HZ, Amanpour F, Mohaghegh P, Tajdini F, Sayarifard A, Davoudi-Monfared E. Assessment of the fitness of Cox and parametric regression models of survival distribution for Iranian breast cancer patients' data. *J Adv Pharm Technol Res* 2019;**10**: 39-44.
28. Baghestani AR, Shahmirzalou P, Zayeri F, Akbari ME, Hadizadeh M. Prognostic factors for survival in patients with breast cancer referred to Cancer Research Center in Iran. *Asian Pacific journal of cancer prevention : APJCP* 2015;**16**: 5081-4.
29. Wu T, Hsu FC, Wang S, Luong D, Pierce JP. Hemoglobin A1c Levels Modify Associations between Dietary Acid Load and Breast Cancer Recurrence. *Nutrients* 2020;**12**.
30. Marinac CRN, S. H. Breen, C. I. Hartman, S. J. Natarajan, L. Pierce, J. P. Flatt, S. W. Sears, D. D. Patterson, R. E. Prolonged Nightly Fasting and Breast Cancer Prognosis. *JAMA oncology* 2016;**2**: 1049-55.
31. Farvid MS, Holmes MD, Chen WY, Rosner BA, Tamimi RM, Willett WC, Eliassen AH. Postdiagnostic Fruit and Vegetable Consumption and Breast Cancer Survival: Prospective Analyses in the Nurses' Health Studies. *Cancer Res* 2020;**80**: 5134-43.
32. Williams PT. Significantly greater reduction in breast cancer mortality from post-diagnosis running than walking. *Int J Cancer* 2014;**135**: 1195-202.
33. Beasley JMN, P. A. Trentham-Dietz, A. Hampton, J. M. Bersch, A. J. Passarelli, M. N. Holick, C. N. Titus-Ernstoff, L. Egan, K. M. Holmes, M. D. Willett, W. C. Post-diagnosis dietary factors and survival after invasive breast cancer. *Breast Cancer Res Treat* 2011;**128**: 229-36.
34. Holmes MDS, M. J. Colditz, G. A. Rosner, B. Hunter, D. J. Willett, W. C. Dietary factors and the survival of women with breast carcinoma. *Cancer* 1999;**86**: 826-35.
35. Nechuta SC, B. J. Chen, W. Y. Kwan, M. L. Lu, W. Cai, H. Poole, E. M. Flatt, S. W. Zheng, W. Pierce, J. P. Shu, X. O. Postdiagnosis cruciferous vegetable consumption and breast cancer outcomes: a report from the After Breast Cancer Pooling Project. *Cancer epidemiology, biomarkers & prevention : a publication of the American Association for Cancer Research, cosponsored by the American Society of Preventive Oncology* 2013;**22**: 1451-6.
36. Thomson CAR, C. L. Thompson, P. A. Caan, B. J. Cussler, E. Flatt, S. W. Pierce, J. P. Vegetable intake is associated with reduced breast cancer recurrence in tamoxifen users: a secondary analysis from the Women's Healthy Eating and Living Study. *Breast Cancer Res Treat* 2011;**125**: 519-27.
37. Hebert JRH, T. G. Ma, Y. The effect of dietary exposures on recurrence and mortality in early stage breast cancer. *Breast Cancer Res Treat* 1998;**51**: 17-28.
38. Andersen JLM, Hansen L, Thomsen BLR, Christiansen LR, Dragsted LO, Olsen A. Pre- and post-diagnostic intake of whole grain and dairy products and breast cancer prognosis: the Danish Diet, Cancer and Health cohort. *Breast Cancer Res Treat* 2020;**179**: 743-53.
39. Holmes MDW, J. Hankinson, S. E. Tamimi, R. M. Chen, W. Y. Protein Intake and Breast Cancer Survival in the Nurses' Health Study. *J Clin Oncol* 2017;**35**: 325-33.

40. Parada H, Jr. Steck, S. E. Bradshaw, P. T. Engel, L. S. Conway, K. Teitelbaum, S. L. Neugut, A. I. Santella, R. M. Gammon, M. D. Grilled, Barbecued, and Smoked Meat Intake and Survival Following Breast Cancer. *Journal of the National Cancer Institute* 2017;**109**.
41. Kroenke CHK, M. L. Sweeney, C. Castillo, A. Caan, B. J. High- and low-fat dairy intake, recurrence, and mortality after breast cancer diagnosis. *Journal of the National Cancer Institute* 2013;**105**: 616-23.
42. Zhang FFH, D. E. Terry, M. B. Knight, J. A. Andrulis, I. L. Daly, M. B. Buys, S. S. John, E. M. Dietary isoflavone intake and all-cause mortality in breast cancer survivors: The Breast Cancer Family Registry. *Cancer* 2017;**123**: 2070-9.
43. Nechuta SJC, B. J. Chen, W. Y. Lu, W. Chen, Z. Kwan, M. L. Flatt, S. W. Zheng, Y. Zheng, W. Pierce, J. P. Shu, X. O. Soy food intake after diagnosis of breast cancer and survival: an in-depth analysis of combined evidence from cohort studies of US and Chinese women. *The American journal of clinical nutrition* 2012;**96**: 123-32.
44. Zhang YFK, H. B. Li, B. L. Zhang, R. M. Positive effects of soy isoflavone food on survival of breast cancer patients in China. *Asian Pacific journal of cancer prevention : APJCP* 2012;**13**: 479-82.
45. Caan BJN, L. Parker, B. Gold, E. B. Thomson, C. Newman, V. Rock, C. L. Pu, M. Al-Delaimy, W. Pierce, J. P. Soy food consumption and breast cancer prognosis. *Cancer epidemiology, biomarkers & prevention : a publication of the American Association for Cancer Research, cosponsored by the American Society of Preventive Oncology* 2011;**20**: 854-8.
46. Guha NK, M. L. Quesenberry, C. P., Jr. Weltzien, E. K. Castillo, A. L. Caan, B. J. Soy isoflavones and risk of cancer recurrence in a cohort of breast cancer survivors: the Life After Cancer Epidemiology study. *Breast Cancer Res Treat* 2009;**118**: 395-405.
47. Shu XOZ, Y. Cai, H. Gu, K. Chen, Z. Zheng, W. Lu, W. Soy food intake and breast cancer survival. *Jama* 2009;**302**: 2437-43.
48. Farvid MS, Tamimi RM, Poole EM, Chen WY, Rosner BA, Willett WC, Holmes MD, Eliassen AH. Postdiagnostic Dietary Glycemic Index, Glycemic Load, Dietary Insulin Index, and Insulin Load and Breast Cancer Survival. *Cancer epidemiology, biomarkers & prevention : a publication of the American Association for Cancer Research, cosponsored by the American Society of Preventive Oncology* 2021;**30**: 335-43.
49. Farvid MS, Barnett JB, Spence ND, Rosner BA, Holmes MD. Types of carbohydrate intake and breast cancer survival. *European journal of nutrition* 2021;**60**: 4565-77.
50. Emond JAP, J. P. Natarajan, L. Gapuz, L. R. Nguyen, J. Parker, B. A. Varki, N. M. Patterson, R. E. Risk of breast cancer recurrence associated with carbohydrate intake and tissue expression of IGFI receptor. *Cancer epidemiology, biomarkers & prevention : a publication of the American Association for Cancer Research, cosponsored by the American Society of Preventive Oncology* 2014;**23**: 1273-9.
51. Belle FNK, E. McTiernan, A. Bernstein, L. Baumgartner, K. Baumgartner, R. Ambs, A. Ballard-Barbash, R. Neuhouser, M. L. Dietary fiber, carbohydrates, glycemic index, and glycemic load in relation to breast cancer prognosis in the HEAL cohort. *Cancer epidemiology, biomarkers & prevention : a publication of the American Association for Cancer Research, cosponsored by the American Society of Preventive Oncology* 2011;**20**: 890-9.
52. Rohan TEH, J. E. McMichael, A. J. Dietary factors and survival from breast cancer. *Nutrition and cancer* 1993;**20**: 167-77.
53. Borugian MJS, S. B. Kim-Sing, C. Van Patten, C. Potter, J. D. Dunn, B. Gallagher, R. P. Hislop, T. G. Insulin, macronutrient intake, and physical activity: are potential indicators of insulin

resistance associated with mortality from breast cancer? *Cancer epidemiology, biomarkers & prevention : a publication of the American Association for Cancer Research, cosponsored by the American Society of Preventive Oncology* 2004;**13**: 1163-72.

54. Ewertz MG, S. Meyer, L. Zedeler, K. Survival of breast cancer patients in relation to factors which affect the risk of developing breast cancer. *Int J Cancer* 1991;**49**: 526-30.

55. Nomura AMM, L. L. Kolonel, L. N. Hankin, J. H. The effect of dietary fat on breast cancer survival among Caucasian and Japanese women in Hawaii. *Breast Cancer Res Treat* 1991;**18 Suppl 1**: S135-41.

56. Newman SCM, A. B. Howe, G. R. A study of the effect of weight and dietary fat on breast cancer survival time. *American journal of epidemiology* 1986;**123**: 767-74.

57. Patterson REF, S. W. Newman, V. A. Natarajan, L. Rock, C. L. Thomson, C. A. Caan, B. J. Parker, B. A. Pierce, J. P. Marine fatty acid intake is associated with breast cancer prognosis. *The Journal of nutrition* 2011;**141**: 201-6.

58. Holmes MDC, W. Y. Hankinson, S. E. Willett, W. C. Physical activity's impact on the association of fat and fiber intake with survival after breast cancer. *American journal of epidemiology* 2009;**170**: 1250-6.

59. Schmidt G, Schneider C, Gerlinger C, Endrikat J, Gabriel L, Stroeder R, Mueller C, Juhasz-Boess I, Solomayer EF. Impact of body mass index, smoking habit, alcohol consumption, physical activity and parity on disease course of women with triple-negative breast cancer. *Arch Gynecol Obstet* 2020;**301**: 603-9.

60. Furrer D, Jacob S, Michaud A, Provencher L, Lemieux J, Diorio C. Association of Tobacco Use, Alcohol Consumption and HER2 Polymorphisms With Response to Trastuzumab in HER2-Positive Breast Cancer Patients. *Clin Breast Cancer Journal Translated Name Clinical Breast Cancer* 2018;**18**: E687-E94.

61. Knight JA, Fan J, Malone KE, John EM, Lynch CF, Langballe R, Bernstein L, Shore RE, Brooks JD, Reiner AS, Woods M, Liang XL, et al. Alcohol consumption and cigarette smoking in combination: A predictor of contralateral breast cancer risk in the WECARE study. *International Journal of Cancer* 2017;**141**: 916-24.

62. Veal CTH, V. Lakoski, S. G. Hampton, J. M. Gangnon, R. E. Newcomb, P. A. Higgins, S. T. Trentham-Dietz, A. Sprague, B. L. Health-related behaviors and mortality outcomes in women diagnosed with ductal carcinoma in situ. *Journal of cancer survivorship : research and practice* 2017;**11**: 320-8.

63. Nakamura KO, E. Ukawa, S. Hirata, M. Nagai, A. Yamagata, Z. Kiyohara, Y. Muto, K. Kamatani, Y. Ninomiya, T. Matsuda, K. Kubo, M. Nakamura, Y. Tamakoshi, A. Characteristics and prognosis of Japanese female breast cancer patients: The BioBank Japan project. *Journal of epidemiology* 2017;**27**: S58-s64.

64. Wu XY, Y. Barcenas, C. H. Chow, W. H. Meng, Q. H. Chavez-MacGregor, M. Hildebrandt, M. A. Zhao, H. Gu, X. Deng, Y. Wagar, E. Esteva, F. J. Tripathy, D. Hortobagyi, G. N. Personalized Prognostic Prediction Models for Breast Cancer Recurrence and Survival Incorporating Multidimensional Data. *Journal of the National Cancer Institute* 2017;**109**.

65. Lowry SJK, K. Chlebowski, R. Li, C. I. Alcohol Use and Breast Cancer Survival among Participants in the Women's Health Initiative. *Cancer epidemiology, biomarkers & prevention : a publication of the American Association for Cancer Research, cosponsored by the American Society of Preventive Oncology* 2016;**25**: 1268-73.

66. Nechuta SC, W. Y. Cai, H. Poole, E. M. Kwan, M. L. Flatt, S. W. Patterson, R. E. Pierce, J. P. Caan, B. J. Ou Shu, X. A pooled analysis of post-diagnosis lifestyle factors in association with late estrogen-receptor-positive breast cancer prognosis. *Int J Cancer* 2016;**138**: 2088-97.
67. Larsen SBK, N. Ibfelt, E. H. Christensen, J. Tjønneland, A. Dalton, S. O. Influence of metabolic indicators, smoking, alcohol and socioeconomic position on mortality after breast cancer. *Acta oncologica (Stockholm, Sweden)* 2015;**54**: 780-8.
68. Simonsson MM, A. Bendahl, P. O. Rose, C. Ingvar, C. Jernström, H. Pre- and postoperative alcohol consumption in breast cancer patients: impact on early events. *SpringerPlus* 2014;**3**: 261.
69. Ali AMS, M. K. Bolla, M. K. Wang, Q. Gago-Dominguez, M. Castelao, J. E. Carracedo, A. Garzón, V. M. Bojesen, S. E. Nordestgaard, B. G. Flyger, H. Chang-Claude, J. Vrieling, A. Rudolph, A. Seibold, P. Nevanlinna, H. Muranen, T. A. Aaltonen, K. Blomqvist, C. Matsuo, K. Ito, H. Iwata, H. Horio, A. John, E. M. Sherman, M. Lissowska, J. Figueroa, J. Garcia-Closas, M. Anton-Culver, H. Shah, M. Hopper, J. L. Trichopoulou, A. Bueno-de-Mesquita, B. Krogh, V. Weiderpass, E. Andersson, A. Clavel-Chapelon, F. Dossus, L. Fagherazzi, G. Peeters, P. H. Olsen, A. Wishart, G. C. Easton, D. F. Borgquist, S. Overvad, K. Barricarte, A. González, C. A. Sánchez, M. J. Amiano, P. Riboli, E. Key, T. Pharoah, P. D. Alcohol consumption and survival after a breast cancer diagnosis: a literature-based meta-analysis and collaborative analysis of data for 29,239 cases. *Cancer epidemiology, biomarkers & prevention : a publication of the American Association for Cancer Research, cosponsored by the American Society of Preventive Oncology* 2014;**23**: 934-45.
70. Kwan MLC, W. Y. Flatt, S. W. Weltzien, E. K. Nechuta, S. J. Poole, E. M. Holmes, M. D. Patterson, R. E. Shu, X. O. Pierce, J. P. Caan, B. J. Postdiagnosis alcohol consumption and breast cancer prognosis in the after breast cancer pooling project. *Cancer epidemiology, biomarkers & prevention : a publication of the American Association for Cancer Research, cosponsored by the American Society of Preventive Oncology* 2013;**22**: 32-41.
71. Newcomb PAK, E. Trentham-Dietz, A. Egan, K. M. Titus, L. J. Baron, J. A. Hampton, J. M. Passarelli, M. N. Willett, W. C. Alcohol consumption before and after breast cancer diagnosis: associations with survival from breast cancer, cardiovascular disease, and other causes. *J Clin Oncol* 2013;**31**: 1939-46.
72. Allin KHN, B. G. Flyger, H. Bojesen, S. E. Elevated pre-treatment levels of plasma C-reactive protein are associated with poor prognosis after breast cancer: a cohort study. *Breast cancer research : BCR* 2011;**13**: R55.
73. Kwan MLK, L. H. Weltzien, E. Tam, E. K. Castillo, A. Sweeney, C. Caan, B. J. Alcohol consumption and breast cancer recurrence and survival among women with early-stage breast cancer: the life after cancer epidemiology study. *J Clin Oncol* 2010;**28**: 4410-6.
74. Flatt SWT, C. A. Gold, E. B. Natarajan, L. Rock, C. L. Al-Delaimy, W. K. Patterson, R. E. Saquib, N. Caan, B. J. Pierce, J. P. Low to moderate alcohol intake is not associated with increased mortality after breast cancer. *Cancer epidemiology, biomarkers & prevention : a publication of the American Association for Cancer Research, cosponsored by the American Society of Preventive Oncology* 2010;**19**: 681-8.
75. Li CI, Daling JR, Porter PL, Tang MT, Malone KE. Relationship between potentially modifiable lifestyle factors and risk of second primary contralateral breast cancer among women diagnosed with estrogen receptor-positive invasive breast cancer. *J Clin Oncol* 2009;**27**: 5312-8.
76. Knight JA, Bernstein L, Largent J, Capanu M, Begg CB, Mellemkjaer L, Lynch CF, Malone KE, Reiner AS, Liang XL, Haile RW, Boice JD, et al. Alcohol Intake and Cigarette Smoking and Risk of a Contralateral Breast Cancer. *American journal of epidemiology* 2009;**169**: 962-8.

77. Barnett GCS, M. Redman, K. Easton, D. F. Ponder, B. A. Pharoah, P. D. Risk factors for the incidence of breast cancer: do they affect survival from the disease? *J Clin Oncol* 2008;**26**: 3310-6.
78. Brewster AMD, K. A. Thompson, P. A. Hahn, K. M. Sahin, A. A. Cao, Y. Stewart, M. M. Murray, J. L. Hortobagyi, G. N. Bondy, M. L. Relationship between epidemiologic risk factors and breast cancer recurrence. *J Clin Oncol* 2007;**25**: 4438-44.
79. Trentham-Dietz A, Newcomb PA, Nichols HB, Hampton JM. Breast cancer risk factors and second primary malignancies among women with breast cancer. *Breast Cancer Res Treat* 2007;**105**: 195-207.
80. Tominaga KA, J. Koyama, Y. Numao, S. Kurokawa, E. Ojima, M. Nagai, M. Family environment, hobbies and habits as psychosocial predictors of survival for surgically treated patients with breast cancer. *Japanese journal of clinical oncology* 1998;**28**: 36-41.
81. Ewertz M. Breast cancer in Denmark. Incidence, risk factors, and characteristics of survival. *Acta oncologica (Stockholm, Sweden)* 1993;**32**: 595-615.
82. Nechuta SL, W. Chen, Z. Zheng, Y. Gu, K. Cai, H. Zheng, W. Shu, X. O. Vitamin supplement use during breast cancer treatment and survival: a prospective cohort study. *Cancer epidemiology, biomarkers & prevention : a publication of the American Association for Cancer Research, cosponsored by the American Society of Preventive Oncology* 2011;**20**: 262-71.
83. Ambrosone CB, Zirpoli GR, Hutson AD, McCann WE, McCann SE, Barlow WE, Kelly KM, Cannioto R, Sucheston-Campbell LE, Hershman DL, Unger JM, Moore HCF, et al. Dietary Supplement Use During Chemotherapy and Survival Outcomes of Patients With Breast Cancer Enrolled in a Cooperative Group Clinical Trial (SWOG S0221). *J Clin Oncol* 2020;**38**: 804-14.
84. Jung AY, Cai X, Thoene K, Obi N, Jaskulski S, Behrens S, Flesch-Janys D, Chang-Claude J. Antioxidant supplementation and breast cancer prognosis in postmenopausal women undergoing chemotherapy and radiation therapy. *The American journal of clinical nutrition* 2019;**109**: 69-78.
85. Kwan ML, Greenlee H, Lee VS, Castillo A, Gunderson EP, Habel LA, Kushi LH, Sweeney C, Tam EK, Caan BJ. Multivitamin use and breast cancer outcomes in women with early-stage breast cancer: the Life After Cancer Epidemiology study. *Breast Cancer Res Treat* 2011;**130**: 195-205.
86. Poole EMS, X. Caan, B. J. Flatt, S. W. Holmes, M. D. Lu, W. Kwan, M. L. Nechuta, S. J. Pierce, J. P. Chen, W. Y. Postdiagnosis supplement use and breast cancer prognosis in the After Breast Cancer Pooling Project. *Breast Cancer Res Treat* 2013;**139**: 529-37.
87. Fleischauer ATS, N. Arab, L. Antioxidant supplements and risk of breast cancer recurrence and breast cancer-related mortality among postmenopausal women. *Nutrition and cancer* 2003;**46**: 15-22.
88. Saquib JP, B. A. Natarajan, L. Madlensky, L. Saquib, N. Patterson, R. E. Newman, V. A. Pierce, J. P. Prognosis following the use of complementary and alternative medicine in women diagnosed with breast cancer. *Complementary therapies in medicine* 2012;**20**: 283-90.
89. Madden JMM, L. Zgaga, L. Bennett, K. De novo vitamin D supplement use post-diagnosis is associated with breast cancer survival. *Breast Cancer Res Treat* 2018;**172**: 179-90.
90. Inoue-Choi MG, H. Oppeneer, S. J. Robien, K. The association between postdiagnosis dietary supplement use and total mortality differs by diet quality among older female cancer survivors. *Cancer epidemiology, biomarkers & prevention : a publication of the American Association for Cancer Research, cosponsored by the American Society of Preventive Oncology* 2014;**23**: 865-75.
91. Harris HRB, L. Wolk, A. Vitamin C intake and breast cancer mortality in a cohort of Swedish women. *British journal of cancer* 2013;**109**: 257-64.

92. Greenlee HK, M. L. Kushi, L. H. Song, J. Castillo, A. Weltzien, E. Quesenberry, C. P., Jr. Caan, B. J. Antioxidant supplement use after breast cancer diagnosis and mortality in the Life After Cancer Epidemiology (LACE) cohort. *Cancer* 2012;**118**: 2048-58.
93. Jacobs ETT, C. A. Flatt, S. W. Al-Delaimy, W. K. Hibler, E. A. Jones, L. A. Leroy, E. C. Newman, V. A. Parker, B. A. Rock, C. L. Pierce, J. P. Vitamin D and breast cancer recurrence in the Women's Healthy Eating and Living (WHEL) Study. *The American journal of clinical nutrition* 2011;**93**: 108-17.
94. Bruemmer BP, R. E. Cheney, C. Aker, S. N. Witherspoon, R. P. The association between vitamin C and vitamin E supplement use before hematopoietic stem cell transplant and outcomes to two years. *Journal of the American Dietetic Association* 2003;**103**: 982-90.
95. Zeichner SB, Koru-Sengul T, Shah N, Liu Q, Markward NJ, Montero AJ, Gluck S, Silva O, Ahn ER. Improved clinical outcomes associated with vitamin D supplementation during adjuvant chemotherapy in patients with HER2+ nonmetastatic breast cancer. *Clin Breast Cancer* 2015;**15**: e1-11.
96. Saquib JR, C. L. Natarajan, L. Saquib, N. Newman, V. A. Patterson, R. E. Thomson, C. A. Al-Delaimy, W. K. Pierce, J. P. Dietary intake, supplement use, and survival among women diagnosed with early-stage breast cancer. *Nutrition and cancer* 2011;**63**: 327-33.
97. Tokunaga E, Masuda T, Ijichi H, Tajiri W, Koga C, Koi Y, Nakamura Y, Ohno S, Taguchi K, Okamoto M. Impact of serum vitamin D on the response and prognosis in breast cancer patients treated with neoadjuvant chemotherapy. *Breast Cancer-Tokyo* 2022;**29**: 156-63.
98. Kanstrup C, Teilmann D, Rejnmark L, Biggaard JV, Eiken P, Kroman N, Tjønneland A, Mejdahl MK. 25-Hydroxyvitamin D at time of breast cancer diagnosis and breast cancer survival. *Breast Cancer Res Tr* 2020;**179**: 699-708.
99. Lim ST, Jeon YW, Gwak H, Suh YJ. Clinical Implications of Serum 25-Hydroxyvitamin D Status after 5-Year Adjuvant Endocrine Therapy for Late Recurrence of Hormone Receptor-positive Breast Cancer. *Journal of Breast Cancer* 2020;**23**: 498-508.
100. Huang YQ, Zhou C, Zhao R, Cui YP, Wu XT. The relationship between vitamin D, ratio of neutrophil to lymphocyte, and ratio of lymphocyte to monocyte in preoperative serum and prognosis of patients with breast conserving surgery in breast cancer. *Int J Clin Exp Med* 2019;**12**: 10537-48.
101. Robsahm TE, Tretli S, Torjesen PA, Babigumira R, Schwartz GG. Serum 25-hydroxyvitamin D levels predict cancer survival: a prospective cohort with measurements prior to and at the time of cancer diagnosis. *Clin Epidemiol* 2019;**11**: 695-705.
102. Tretli SS, G. G. Torjesen, P. A. Robsahm, T. E. Serum levels of 25-hydroxyvitamin D and survival in Norwegian patients with cancer of breast, colon, lung, and lymphoma: a population-based study. *Cancer causes & control : CCC* 2012;**23**: 363-70.
103. Thanasitthichai S, Prasitthipayong A, Boonmark K, Purisa W, Guayraksa K. Negative Impact of 25-hydroxyvitamin D Deficiency on Breast Cancer Survival. *Asian Pacific journal of cancer prevention : APJCP* 2019;**20**: 3101-6.
104. Bouvard B, Chatelais J, Soulie P, Hoppe E, Saulnier P, Capitain O, Mege M, Mesgouez-Nebout N, Jadaud E, Abadie-Lacourtoisie S, Campone M, Legrand E. Osteoporosis treatment and 10 years' oestrogen receptor+ breast cancer outcome in postmenopausal women treated with aromatase inhibitors. *Eur J Cancer* 2018;**101**: 87-94.

105. Mizrak Kaya DO, B. Kubilay, P. Onur, H. Utkan, G. Cay Senler, F. Alkan, A. Yerlikaya, H. Koksoy, E. B. Karci, E. Demirkazik, A. Akbulut, H. Icli, F. Diagnostic serum vitamin D level is not a reliable prognostic factor for resectable breast cancer. *Future Oncol* 2018;**14**: 1461-7.
106. Kim JSH, C. C. Kim, J. H. Lim, S. M. Yoon, K. H. Kim, J. Y. Park, H. S. Park, S. Kim, S. I. Cho, Y. U. Park, B. W. Association between Changes in Serum 25-Hydroxyvitamin D Levels and Survival in Patients with Breast Cancer Receiving Neoadjuvant Chemotherapy. *J Breast Cancer* 2018;**21**: 134-41.
107. Viala M, Chiba A, Thezenas S, Delmond L, Lamy PJ, Mott SL, Schroeder MC, Thomas A, Jacot W. Impact of vitamin D on pathological complete response and survival following neoadjuvant chemotherapy for breast cancer: a retrospective study. *BMC Cancer* 2018;**18**: 770.
108. Yao SK, M. L. Ergas, I. J. Roh, J. M. Cheng, T. D. Hong, C. C. McCann, S. E. Tang, L. Davis, W. Liu, S. Quesenberry, C. P., Jr. Lee, M. M. Ambrosone, C. B. Kushi, L. H. Association of Serum Level of Vitamin D at Diagnosis With Breast Cancer Survival: A Case-Cohort Analysis in the Pathways Study. *JAMA oncology* 2017;**3**: 351-7.
109. Wu YS, M. Clayton, S. Chlebowski, R. Vadgama, J. V. Association of Vitamin D3 Level with Breast Cancer Risk and Prognosis in African-American and Hispanic Women. *Cancers (Basel)* 2017;**9**.
110. Lim ST, Jeon YW, Suh YJ. Association between alterations in the serum 25-hydroxyvitamin d status during follow-up and breast cancer patient prognosis. *Asian Pacific journal of cancer prevention : APJCP* 2015;**16**: 2507-13.
111. Lohmann AEC, J. A. Burnell, M. J. Levine, M. N. Tsvetkova, E. Pritchard, K. I. Gelmon, K. A. O'Brien, P. Han, L. Rugo, H. S. Albain, K. S. Perez, E. A. Vandenberg, T. A. Chalchal, H. I. Sawhney, R. P. Shepherd, L. E. Goodwin, P. J. Prognostic associations of 25 hydroxy vitamin D in NCIC CTG MA.21, a phase III adjuvant randomized clinical trial of three chemotherapy regimens in high-risk breast cancer. *Breast Cancer Res Treat* 2015;**150**: 605-11.
112. Vrieling AS, P. Johnson, T. S. Heinz, J. Obi, N. Kaaks, R. Flesch-Janys, D. Chang-Claude, J. Circulating 25-hydroxyvitamin D and postmenopausal breast cancer survival: Influence of tumor characteristics and lifestyle factors? *Int J Cancer* 2014;**134**: 2972-83.
113. Villaseñor AB-B, R. Ambs, A. Bernstein, L. Baumgartner, K. Baumgartner, R. Ulrich, C. M. Hollis, B. W. McTiernan, A. Neuhauser, M. L. Associations of serum 25-hydroxyvitamin D with overall and breast cancer-specific mortality in a multiethnic cohort of breast cancer survivors. *Cancer causes & control : CCC* 2013;**24**: 759-67.
114. Hatse SL, D. Verstuyf, A. Smeets, A. Brouwers, B. Vandorpe, T. Brouckaert, O. Peuteman, G. Laenen, A. Verlinden, L. Kriebitzsch, C. Dieudonné, A. S. Paridaens, R. Neven, P. Christiaens, M. R. Bouillon, R. Wildiers, H. Vitamin D status at breast cancer diagnosis: correlation with tumor characteristics, disease outcome, and genetic determinants of vitamin D insufficiency. *Carcinogenesis* 2012;**33**: 1319-26.
115. Kim HJ, Lee YM, Ko BS, Lee JW, Yu JH, Son BH, Gong GY, Kim SB, Ahn SH. Vitamin D Deficiency is Correlated with Poor Outcomes in Patients with Luminal-type Breast Cancer. *Ann Surg Oncol* 2011;**18**: 1830-6.
116. Pritchard KIS, L. E. Chapman, J. A. Norris, B. D. Cantin, J. Goss, P. E. Dent, S. F. Walde, D. Vandenberg, T. A. Findlay, B. O'Reilly, S. E. Wilson, C. F. Han, L. Piura, E. Whelan, T. J. Pollak, M. N. Randomized trial of tamoxifen versus combined tamoxifen and octreotide LAR Therapy in the adjuvant treatment of early-stage breast cancer in postmenopausal women: NCIC CTG MA.14. *J Clin Oncol* 2011;**29**: 3869-76.

117. Vrieling AH, R. Abbas, S. Schneeweiss, A. Flesch-Janys, D. Chang-Claude, J. Serum 25-hydroxyvitamin D and postmenopausal breast cancer survival: a prospective patient cohort study. *Breast cancer research : BCR* 2011;**13**: R74.
118. Goodwin PJE, M. Pritchard, K. I. Koo, J. Hood, N. Prognostic effects of 25-hydroxyvitamin D levels in early breast cancer. *J Clin Oncol* 2009;**27**: 3757-63.
119. Chubak JB, D. M. Wirtz, H. S. McKnight, B. Weiss, N. S. Threats to validity of nonrandomized studies of postdiagnosis exposures on cancer recurrence and survival. *Journal of the National Cancer Institute* 2013;**105**: 1456-62.
120. Savitz DAW, G. A. Trikalinos, T. A. The Problem With Mechanistic Risk of Bias Assessments in Evidence Synthesis of Observational Studies and a Practical Alternative: Assessing the Impact of Specific Sources of Potential Bias. *American journal of epidemiology* 2019;**188**: 1581-5.
121. Orsini NB, R. Greenland, S. Generalized least squares for trend estimation of summarized dose-response data. *Stata J* 2006;**6**: 40-57.
122. Bekkering GEH, R. J. Thomas, S. Mayer, A. M. Beynon, R. Ness, A. R. Harbord, R. M. Bain, C. Smith, G. D. Sterne, J. A. How much of the data published in observational studies of the association between diet and prostate or bladder cancer is usable for meta-analysis? *American journal of epidemiology* 2008;**167**: 1017-26.
123. DerSimonian RL, N. Meta-analysis in clinical trials. *Control Clin Trials* 1986;**7**: 177-88.
124. Greenland SL, M. P. Methods for trend estimation from summarized dose-response data, with applications to meta-analysis. *American journal of epidemiology* 1992;**135**: 1301-9.
125. Viechtbauer WC, M. W. Outlier and influence diagnostics for meta-analysis. *Res Synth Methods* 2010;**1**: 112-25.
126. Orsini NL, R. Wolk, A. Khudyakov, P. Spiegelman, D. Meta-analysis for linear and nonlinear dose-response relations: examples, an evaluation of approximations, and software. *American journal of epidemiology* 2012;**175**: 66-73.
127. Jackson DW, I. R. Thompson, S. G. Extending DerSimonian and Laird's methodology to perform multivariate random effects meta-analyses. *Stat Med* 2010;**29**: 1282-97.
